# Supplementary material for: Cr-catalyzed chiral allenone synthesisviasequential radical–polar crossover and Oppenauer oxidation
Source: Royal Society of Chemistry journal article supplement (doi:10.1039/d2qo01676a), 2022-11-29
Supplement: d2qo01676a1.pdf [file d2qo01676a1.pdf]

# Cr-Catalyzed Chiral Allenone Synthesis via Sequential Radical-Polar Crossover and Oppenauer Oxidation

Xianrong Zeng<sup>1,2,3</sup>, Feng-Hua Zhang<sup>2,3\*</sup>, Zhaobin Wang<sup>2,3\*</sup>

**Affiliations:**<sup>1</sup> Department of Chemistry, Zhejiang University, Hangzhou 310058, China

<sup>2</sup> Key Laboratory of Precise Synthesis of Functional Molecules of Zhejiang Province, Department of Chemistry, School of Science, Westlake University, Hangzhou 310030, Zhejiang Province, China;

<sup>3</sup> Institute of Natural Sciences, Westlake Institute for Advanced Study, Hangzhou 310024, Zhejiang Province, China

\*Correspondence to: wangzhaobin@westlake.edu.cn; zhangfenghua@westlake.edu.cn

## Supporting Information

### Table of Contents

|       |                                                   |     |
|-------|---------------------------------------------------|-----|
| I.    | General Information .....                         | S2  |
| II.   | Preparation of Coupling Partners .....            | S3  |
| III.  | Catalytic Asymmetric Allenylation Reactions ..... | S6  |
| IV.   | Effect of Reaction Parameters .....               | S26 |
| V.    | Preliminary Mechanistic Study .....               | S28 |
| VI.   | Assignment of the Absolute Configuration .....    | S32 |
| VII.  | References .....                                  | S34 |
| VIII. | NMR Spectra .....                                 | S35 |
| IX.   | Stereoselectivity Analysis .....                  | S81 |

## I. General Information

Unless otherwise noted, reagents were used as received from Sigma-Aldrich, Alfa, TCI, Energy Chemical, J&K. The aldehydes used for the reaction had been purified by reduced pressure distillation or recrystallization. All reactions were performed under an atmosphere of dry nitrogen gas. Anhydrous THF was purchased from J&K and stored under nitrogen gas. Other solvents were purified with activated aluminum oxide using a solvent-purification system.

NMR spectra were recorded on a Bruker spectrometer with a Prodigy broadband cryoprobe (500 MHz and 600 MHz); chemical shifts ( $\delta$ ) are reported in ppm downfield from tetramethylsilane, using the solvent resonance as the internal standard. Optical rotation data were obtained with a Jasco P-2000 polarimeter at 589 nm, using a 50 mm path-length cell in the solvent and at the concentration indicated. High resolution mass spectrometric analysis was performed on ultra-performance liquid chromatography-time-of-flight mass spectrometer (Synapt-G2-Si, Waters, USA) with electron spray ionization (ESI) resource and atmosphere pressure chemical ionization (APCI) resource. SFC analysis was carried out on an Agilent 1260 series system with Daicel CHIRALPAK® or Daicel CHIRALCEL® columns (internal diameter 4.6 mm, column length 250 mm, particle size 3  $\mu$ m). HPLC analysis was carried out on Waters Arc HPLC system with Daicel CHIRALPAK® or Daicel CHIRALCEL® columns (internal diameter 4.6 mm, column length 250 mm, particle size 3  $\mu$ m).

## II. Preparation of Coupling Partners

**Ligand Preparation:** The ligand (*R,S*)-L1 and (*S,R*)-L1 were prepared according to a reported literature procedure, and all the analytical data matched the report (1).

### The structures of propargyl bromides

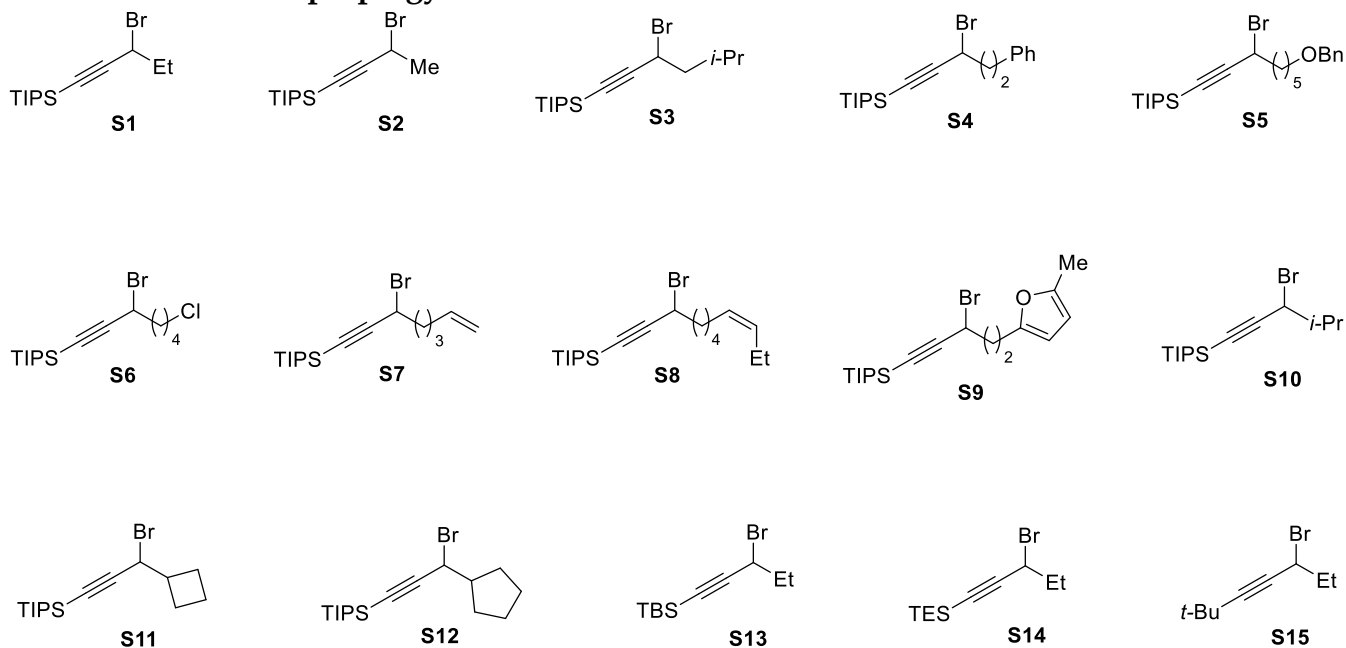

### Propargyl Bromides Preparation:

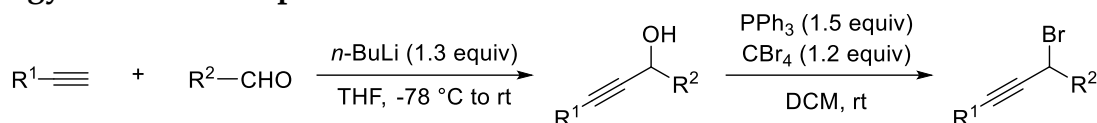

#### General Procedure 1 (GP-1): Preparation of propargyl bromides

A solution of the corresponding alkyne (20 mmol, 1.0 equiv) in 100 mL THF was cooled to  $-78\text{ }^\circ\text{C}$ , *n*-butyl lithium in *n*-hexane (26 mmol, 1.3 equiv) was added dropwise under nitrogen atmosphere. The mixture was stirred at  $-78\text{ }^\circ\text{C}$  for 20 minutes, followed by the dropwise addition of the corresponding aldehyde (24 mmol, 1.2 equiv). The resulting mixture was stirred at  $-78\text{ }^\circ\text{C}$  for 1 h, and then warmed to room temperature slowly and stirred overnight. Saturated  $\text{NH}_4\text{Cl}$  aqueous solution (30 mL) was added cautiously at  $0\text{ }^\circ\text{C}$ . The resulting mixture was extracted with EtOAc ( $2 \times 50\text{ mL}$ ), and the organic phase was combined, washed with brine (60 mL), dried with anhydrous  $\text{MgSO}_4$ , and concentrated. The resulting mixture was purified by flash chromatography (hexanes/ethyl acetate) to provide propargyl alcohols.

To the cooled solution of the propargyl alcohols (20 mmol, 1.0 equiv) in 50 mL DCM at  $0\text{ }^\circ\text{C}$ ,  $\text{CBr}_4$  (8.0 g, 24 mmol, 1.2 equiv) was added under air in one portion. The mixture was stirred at rt for 10 minutes, and then triphenylphosphine (7.9 g, 30 mmol, 1.5 equiv) in 20 mL DCM was added dropwise at  $0\text{ }^\circ\text{C}$ . The resulting mixture was stirred at rt for overnight. After completion of the reaction, the mixture was concentrated, purified by flash chromatography (hexanes/ethyl acetate), and further distilled under reduced pressure, which furnished the desired propargyl bromides.

Compound **S5**, **S6**, **S8** were prepared according to the **GP-1**.

Compound **S1-S4**, **S7**, **S9-S15** were prepared according to reported literature procedure, and all the analytical data matched the reports (2,3).

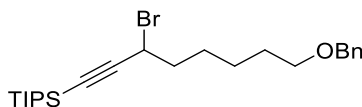

**(8-(benzyloxy)-3-bromooct-1-yn-1-yl)triisopropylsilane (S5).** The title compound was prepared according to the **GP-1**, using ethynyltriisopropylsilane and 6-(benzyloxy)hexanal, purified by flash column chromatography: 100% hexanes, 63% yield over 2 steps, colorless liquid.

$^1\text{H}$  NMR (600 MHz,  $\text{CDCl}_3$ )  $\delta$  7.33 (m, 4H), 7.26 (m, 1H), 4.52 (t,  $J = 6.7\text{ Hz}$ , 1H), 4.49 (s, 2H), 3.46 (t,  $J = 6.5\text{ Hz}$ , 2H), 2.00 (dd,  $J = 15.5, 6.8\text{ Hz}$ , 2H), 1.63 (m, 2H), 1.57 (m, 2H), 1.42 (m, 2H), 1.07 (d,  $J = 2.1\text{ Hz}$ , 21H).

$^{13}\text{C}$  NMR (151 MHz,  $\text{CDCl}_3$ )  $\delta$  138.5, 128.3, 127.5, 127.4, 105.9, 88.6, 72.9, 70.1, 39.7, 37.3, 29.5, 27.1, 25.3, 18.5, 11.1.

HRMS (APCI)  $m/z$   $[\text{M} - \text{Br}]^+$  calcd for  $\text{C}_{24}\text{H}_{39}\text{OSi}$ : 371.2770, found: 371.2766.



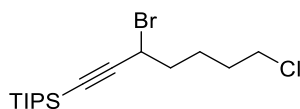

**(3-bromo-7-chlorohept-1-yn-1-yl)triisopropylsilane (S6).** The title compound was prepared according to the **GP-1**, using ethynyltriisopropylsilane and 5-chloropentanal, purified by flash column chromatography: 100% hexanes, 63% yield over 2 steps, colorless liquid.

$^1\text{H}$  NMR (500 MHz,  $\text{CDCl}_3$ )  $\delta$  4.56 (t,  $J$  = 6.6 Hz, 1H), 3.54 (t,  $J$  = 6.5 Hz, 2H), 2.07 – 2.01 (m, 2H), 1.86 – 1.79 (m, 2H), 1.77 – 1.70 (m, 2H), 1.07 (s, 21H).

$^{13}\text{C}$  NMR (126 MHz,  $\text{CDCl}_3$ )  $\delta$  105.4, 89.2, 44.5, 38.9, 36.8, 31.7, 24.7, 18.5, 11.1.

HRMS (APCI)  $m/z$   $[\text{M} - \text{Br}]^+$  calcd for  $\text{C}_{16}\text{H}_{30}\text{ClSi}$ : 285.1805, found: 285.1810.

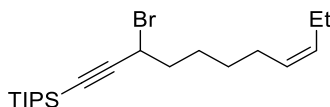

**(Z)-(3-bromoundec-8-en-1-yn-1-yl)triisopropylsilane (S8).** The title compound was prepared according to the **GP-1**, using ethynyltriisopropylsilane and (Z)-non-6-enal, purified by flash column chromatography: 100% hexanes, 57% yield over 2 steps, colorless liquid.

$^1\text{H}$  NMR (500 MHz,  $\text{CDCl}_3$ )  $\delta$  5.42 – 5.27 (m, 2H), 4.54 (t,  $J$  = 6.7 Hz, 1H), 2.08 – 1.98 (m, 6H), 1.61 – 1.54 (m, 2H), 1.43 – 1.36 (m, 2H), 1.08 (s, 21H), 0.96 (t,  $J$  = 7.6 Hz, 3H).

$^{13}\text{C}$  NMR (126 MHz,  $\text{CDCl}_3$ )  $\delta$  132.0, 128.5, 105.9, 88.7, 39.7, 37.3, 28.8, 27.0, 26.8, 20.5, 18.5, 14.3, 11.1.

HRMS (ESI)  $m/z$   $[\text{M} + \text{H}]^+$  calcd for  $\text{C}_{20}\text{H}_{37}\text{BrSi}$ : 305.2664, found: 305.2656.

### III. Catalytic Asymmetric Allenylation Reactions

#### General procedure 2 (GP-2): Catalytic Allenylation Reactions.

**Preparation of the catalyst solution:** In a nitrogen-filled glovebox, an oven-dried 20 mL vial with a magnetic stir bar, was charged the CrCl<sub>2</sub> (4.9 mg, 0.04 mmol, 10 mol% for product **1-27**, 2.5 mg, 0.02 mmol, 5 mol% for product **28-41**) and (*R,S*)-**L1** (29.0 mg, 0.06 mmol, 15 mol% for product **1-27**, 13.5 mg, 0.028 mmol, 7 mol% for product **28-41**). Then 8.0 mL THF was added and the vial was closed with a PTFE septum cap. The mixture was stirred at room temperature for 2 h.

**Catalytic asymmetric allenylation:** In a nitrogen-filled glovebox, to the prepared catalyst solution was added the propargyl bromide (0.4 mmol, 1.0 equiv), the LiBr (35 mg, 0.4 mmol, 1.0 equiv), the aldehyde (0.8 mmol, 2.0 equiv), the dissociation reagent TESCl (135  $\mu$ L, 0.8 mmol, 2.0 equiv), and Mn powder (44 mg, 0.8 mmol, 2.0 equiv) sequentially. Then the vial was closed with a PTFE septum cap, and taken out of the glovebox. The reaction mixture was stirred at 40 °C for 8 h.

**Work-up:** The reaction mixture was run through a short silica gel pad with hexanes/EtOAc (5:1) as the eluent. Then the solvent was removed the under reduced pressure, and the residue was purified by flash chromatography to provide the desired product.

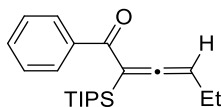

**1-phenyl-2-(triisopropylsilyl)hexa-2,3-dien-1-one (Scheme 2, entry 1).** The title compound was prepared according to the **GP-2** from benzaldehyde and (3-bromopent-1-yn-1-yl)triisopropylsilane, purified by flash column chromatography on silica gel: hexane, colorless liquid.

(*R,S*)-**L1**: 96 mg, 73% yield, 92% ee; (*S,R*)-**L1**: 96 mg, 73% yield, 92% ee.

HPLC analysis: The ee was determined on a CHIRALPAK: AD-3 column (0.5% *i*-PrOH in hexane, 1.0 mL/min); retention times for compound obtained using (*R,S*)-**L1**: 4.2 min (major), 4.5 min (minor).

<sup>1</sup>H NMR (500 MHz, CDCl<sub>3</sub>)  $\delta$  7.88 – 7.83 (m, 2H), 7.53 – 7.48 (m, 1H), 7.43 – 7.39 (m, 2H), 5.01 (t, *J* = 7.2 Hz, 1H), 2.10 (p, *J* = 7.4 Hz, 2H), 1.41 – 1.32 (m, 3H), 1.11 (dd, *J* = 7.5, 4.1 Hz, 18H), 0.97 (t, *J* = 7.5 Hz, 3H).

<sup>13</sup>C NMR (126 MHz, CDCl<sub>3</sub>)  $\delta$  215.3, 196.5, 138.4, 132.1, 129.3, 128.0, 98.0, 88.9, 21.5, 18.7 (two carbons), 14.0, 11.7.

HRMS (ESI) *m/z* [M + H]<sup>+</sup> calcd for C<sub>21</sub>H<sub>33</sub>OSi: 329.2301, found: 329.2290.

[ $\alpha$ ]<sub>D</sub><sup>24</sup> = -6.4 (*c* = 0.5, CHCl<sub>3</sub>); 92% ee, from (*R,S*)-**L1**.

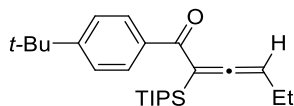

**1-(4-(*tert*-butyl)phenyl)-2-(triisopropylsilyl)hexa-2,3-dien-1-one (Scheme 2, entry 2).** The title compound was prepared according to the **GP-2** from 4-(*tert*-butyl)benzaldehyde and (3-bromopent-1-yn-1-yl)triisopropylsilane, purified by flash column chromatography on silica gel: hexane, colorless liquid.

(*R,S*)-**L1**: 108 mg, 70% yield, 90% ee; (*S,R*)-**L1**: 107 mg, 69% yield, 90% ee.

HPLC analysis: The ee was determined on a CHIRALPAK: AD-3 column (0.5% *i*-PrOH in hexane, 1.0 mL/min); retention times for compound obtained using (*R,S*)-**L1**: 4.4 min (major), 4.9 min (minor).

<sup>1</sup>H NMR (500 MHz, CDCl<sub>3</sub>) δ 7.87 – 7.81 (m, 2H), 7.45 – 7.40 (m, 2H), 5.01 (t, *J* = 7.2 Hz, 1H), 2.12 (p, *J* = 7.3 Hz, 2H), 1.40 – 1.33 (m, 12H), 1.15 – 1.09 (m, 18H), 1.00 (t, *J* = 7.4 Hz, 3H).

<sup>13</sup>C NMR (126 MHz, CDCl<sub>3</sub>) δ 214.5, 195.8, 155.7, 135.5, 129.4, 124.9, 97.8, 88.7, 35.0, 31.1, 21.6, 18.7 (two carbons), 14.0, 11.7.

HRMS (ESI) *m/z* [M + H]<sup>+</sup> calcd for C<sub>25</sub>H<sub>41</sub>OSi: 385.2927, found: 385.2925.

[α]<sub>D</sub><sup>24</sup> = +9.2 (*c* = 0.5, CHCl<sub>3</sub>); 90% ee, from (*R,S*)-**L1**.

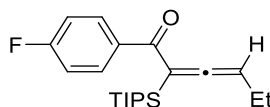

**1-(4-fluorophenyl)-2-(triisopropylsilyl)hexa-2,3-dien-1-one (Scheme 2, entry 3).** The title compound was prepared according to the **GP-2** from 4-fluorobenzaldehyde and (3-bromopent-1-yn-1-yl)triisopropylsilane, purified by flash column chromatography on silica gel: hexane, colorless liquid.

(*R,S*)-**L1**: 97 mg, 70% yield, 93% ee; (*S,R*)-**L1**: 97 mg, 70% yield, 93% ee.

HPLC analysis: The ee was determined on a CHIRALPAK: AD-3 column (0.5% *i*-PrOH in hexane, 1.0 mL/min); retention times for compound obtained using (*R,S*)-**L1**: 4.1 min (major), 4.4 min (minor).

<sup>1</sup>H NMR (500 MHz, CDCl<sub>3</sub>) δ 7.92 – 7.86 (m, 2H), 7.11 – 7.05 (m, 2H), 5.02 (t, *J* = 7.2 Hz, 1H), 2.10 (p, *J* = 7.4 Hz, 2H), 1.39 – 1.32 (m, 3H), 1.11 (dd, *J* = 7.5, 2.6 Hz, 18H), 0.98 (t, *J* = 7.4 Hz, 3H).

<sup>13</sup>C NMR (126 MHz, CDCl<sub>3</sub>) δ 214.9 (s), 194.8 (s), 165.2 (d, *J* = 253.3 Hz), 134.6 (d, *J* = 2.9 Hz), 131.8 (d, *J* = 9.1 Hz), 115.0 (d, *J* = 21.7 Hz), 98.0 (s), 89.0 (s), 21.5 (s), 18.7 (s, two carbons), 14.1 (s), 11.6 (s).

<sup>19</sup>F NMR (471 MHz, CDCl<sub>3</sub>) δ -106.89.

HRMS (ESI) *m/z* [M + H]<sup>+</sup> calcd for C<sub>21</sub>H<sub>32</sub>FOSi: 347.2206, found: 347.2193.

[α]<sub>D</sub><sup>24</sup> = +1.6 (*c* = 0.5, CHCl<sub>3</sub>); 93% ee, from (*R,S*)-**L1**.

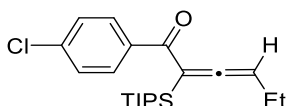

**1-(4-chlorophenyl)-2-(triisopropylsilyl)hexa-2,3-dien-1-one (Scheme 2, entry 4).** The title compound was prepared according to the **GP-2** from 4-chlorobenzaldehyde and (3-bromopent-1-yn-1-yl)triisopropylsilane, purified by flash column chromatography on silica gel: hexane,

colorless liquid.

(*R,S*)-**L1**: 94 mg, 65% yield, 90% ee; (*S,R*)-**L1**: 98 mg, 67% yield, 90% ee.

HPLC analysis: The ee was determined on a CHIRALPAK: AD-3 column (0.5% *i*-PrOH in hexane, 1.0 mL/min); retention times for compound obtained using (*R,S*)-**L1**: 4.3 min (major), 4.7 min (minor).

<sup>1</sup>H NMR (500 MHz, CDCl<sub>3</sub>) δ 7.82 – 7.77 (m, 2H), 7.40 – 7.35 (m, 2H), 5.03 (t, *J* = 7.2 Hz, 1H), 2.09 (p, *J* = 7.4 Hz, 2H), 1.39 – 1.31 (m, 3H), 1.10 (dd, *J* = 7.7, 2.8 Hz, 18H), 0.98 (t, *J* = 7.5 Hz, 3H).

<sup>13</sup>C NMR (126 MHz, CDCl<sub>3</sub>) δ 215.2, 195.0, 138.4, 136.6, 130.7, 128.3, 98.0, 89.1, 21.5, 18.7, 18.6, 14.0, 11.6.

HRMS (ESI) *m/z* [M + H]<sup>+</sup> calcd for C<sub>21</sub>H<sub>32</sub>ClOSi: 363.1911, found: 363.1906.

[α]<sub>D</sub><sup>24</sup> = +13.6 (*c* = 0.5, CHCl<sub>3</sub>); 90% ee, from (*R,S*)-**L1**.

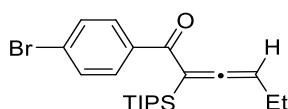

**1-(4-bromophenyl)-2-(triisopropylsilyl)hexa-2,3-dien-1-one (Scheme 2, entry 5).** The title compound was prepared according to the **GP-2** from 4-bromobenzaldehyde and (3-bromopent-1-yn-1-yl)triisopropylsilane, purified by flash column chromatography on silica gel: hexane, colorless liquid.

(*R,S*)-**L1**: 110 mg, 67% yield, 90% ee; (*S,R*)-**L1**: 118 mg, 72% yield, 90% ee.

HPLC analysis: The ee was determined on a CHIRALPAK: AD-3 column (0.5% *i*-PrOH in hexane, 1.0 mL/min); retention times for compound obtained using (*R,S*)-**L1**: 4.7 min (major), 5.3 min (minor).

<sup>1</sup>H NMR (500 MHz, CDCl<sub>3</sub>) δ 7.74 – 7.70 (m, 2H), 7.57 – 7.52 (m, 2H), 5.03 (t, *J* = 7.2 Hz, 1H), 2.09 (p, *J* = 7.4 Hz, 2H), 1.38 – 1.32 (m, 3H), 1.10 (dd, *J* = 7.6, 2.7 Hz, 18H), 0.98 (t, *J* = 7.5 Hz, 3H).

<sup>13</sup>C NMR (126 MHz, CDCl<sub>3</sub>) δ 215.2, 195.2, 137.0, 131.2, 130.8, 127.1, 98.0, 89.2, 21.5, 18.7 (two carbons), 14.0, 11.6.

HRMS (ESI) *m/z* [M + H]<sup>+</sup> calcd for C<sub>21</sub>H<sub>32</sub>BrOSi: 409.1388, found: 409.1399.

[α]<sub>D</sub><sup>24</sup> = +13.6 (*c* = 0.5, CHCl<sub>3</sub>); 90% ee, from (*R,S*)-**L1**.

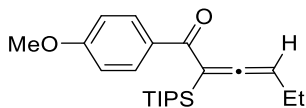

**1-(4-methoxyphenyl)-2-(triisopropylsilyl)hexa-2,3-dien-1-one (Scheme 2, entry 6).** The title compound was prepared according to the **GP-2** from 4-methoxybenzaldehyde and (3-bromopent-1-yn-1-yl)triisopropylsilane, purified by flash column chromatography on silica gel: hexane, colorless liquid.

(*R,S*)-**L1**: 90 mg, 63% yield, 93% ee; (*S,R*)-**L1**: 89 mg, 62% yield, 93% ee.

HPLC analysis: The ee was determined on a CHIRALPAK: AD-3 column (0.5% *i*-PrOH in hexane, 1.0 mL/min); retention times for compound obtained using (*R,S*)-**L1**: 6.7 min (major), 7.6 min (minor).

$^1\text{H}$  NMR (500 MHz,  $\text{CDCl}_3$ )  $\delta$  7.93 – 7.88 (m, 2H), 6.92 – 6.88 (m, 2H), 5.00 (t,  $J$  = 7.2 Hz, 1H), 3.85 (s, 3H), 2.11 (p,  $J$  = 7.4 Hz, 2H), 1.38 – 1.31 (m, 3H), 1.11 (dd,  $J$  = 7.6, 2.9 Hz, 18H), 1.00 (t,  $J$  = 7.5 Hz, 3H).

$^{13}\text{C}$  NMR (126 MHz,  $\text{CDCl}_3$ )  $\delta$  213.6, 194.6, 162.9, 131.7, 131.0, 113.2, 97.7, 88.4, 55.3, 21.6, 18.7 (two carbons), 14.1, 11.7.

HRMS (ESI)  $m/z$   $[\text{M} + \text{H}]^+$  calcd for  $\text{C}_{22}\text{H}_{35}\text{O}_2\text{Si}$ : 359.2406, found: 359.2409.

$[\alpha]^{24}_{\text{D}} = +26.0$  ( $c$  = 0.5,  $\text{CHCl}_3$ ); 93% ee, from (*R,S*)-**L1**.

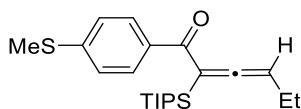

**1-(4-(methylthio)phenyl)-2-(triisopropylsilyl)hexa-2,3-dien-1-one (Scheme 2, entry 7).** The title compound was prepared according to the **GP-2** from 4-(methylthio)benzaldehyde and (3-bromopent-1-yn-1-yl)triisopropylsilane, purified by flash column chromatography on silica gel: hexane, colorless liquid.

(*R,S*)-**L1**: 108 mg, 72% yield, 93% ee; (*S,R*)-**L1**: 108 mg, 72% yield, 93% ee.

HPLC analysis: The ee was determined on a CHIRALPAK: AD-3 column (0.5% *i*-PrOH in hexane, 1.0 mL/min); retention times for compound obtained using (*R,S*)-**L1**: 7.4 min (major), 8.2 min (minor).

$^1\text{H}$  NMR (500 MHz,  $\text{CDCl}_3$ )  $\delta$  7.85 – 7.80 (m, 2H), 7.25 – 7.21 (m, 2H), 5.01 (t,  $J$  = 7.2 Hz, 1H), 2.51 (s, 3H), 2.10 (p,  $J$  = 7.4 Hz, 2H), 1.38 – 1.31 (m, 3H), 1.11 (dd,  $J$  = 7.6, 2.6 Hz, 18H), 0.99 (t,  $J$  = 7.5 Hz, 3H).

$^{13}\text{C}$  NMR (126 MHz,  $\text{CDCl}_3$ )  $\delta$  214.2, 195.1, 144.7, 134.5, 129.9, 124.6, 97.7, 88.7, 21.5, 18.7 (two carbons), 14.8, 14.1, 11.6.

HRMS (ESI)  $m/z$   $[\text{M} + \text{H}]^+$  calcd for  $\text{C}_{22}\text{H}_{35}\text{OSSi}$ : 375.2178, found: 375.2177.

$[\alpha]^{24}_{\text{D}} = +16.0$  ( $c$  = 0.5,  $\text{CHCl}_3$ ); 93% ee, from (*R,S*)-**L1**.

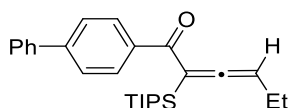

**1-([1,1'-biphenyl]-4-yl)-2-(triisopropylsilyl)hexa-2,3-dien-1-one (Scheme 2, entry 8).** The title compound was prepared according to the **GP-2** from [1,1'-biphenyl]-4-carbaldehyde and (3-bromopent-1-yn-1-yl)triisopropylsilane, purified by flash column chromatography on silica gel: hexane, colorless liquid.

(*R,S*)-**L1**: 127 mg, 78% yield, 91% ee; (*S,R*)-**L1**: 124 mg, 76% yield, 91% ee.

HPLC analysis: The ee was determined on a CHIRALCEL: OD-3 column (0.5% *i*-PrOH in hexane, 1.0 mL/min); retention times for compound obtained using (*R,S*)-**L1**: 4.9 min (major), 5.2 min (minor).

$^1\text{H}$  NMR (500 MHz,  $\text{CDCl}_3$ )  $\delta$  8.01 – 7.97 (m, 2H), 7.69 – 7.63 (m, 4H), 7.50 – 7.45 (m, 2H), 7.43 – 7.37 (m, 1H), 5.07 (t,  $J$  = 7.2 Hz, 1H), 2.16 (p,  $J$  = 7.4 Hz, 2H), 1.46 – 1.38 (m, 3H), 1.17 (dd,  $J$  = 7.7, 4.1 Hz, 18H), 1.03 (t,  $J$  = 7.5 Hz, 3H).

$^{13}\text{C}$  NMR (126 MHz,  $\text{CDCl}_3$ )  $\delta$  214.9, 195.8, 144.8, 140.1, 137.0, 129.9, 128.8, 128.0, 127.2, 126.6, 98.0, 88.9, 21.5, 18.7 (two carbons), 14.0, 11.7.

HRMS (ESI)  $m/z$   $[\text{M} + \text{H}]^+$  calcd for  $\text{C}_{27}\text{H}_{37}\text{OSi}$ : 405.2614, found: 405.2603.

$[\alpha]^{24}_{\text{D}} = +4.8$  ( $c = 0.5$ ,  $\text{CHCl}_3$ ); 91% ee, from (*R,S*)-**L1**.

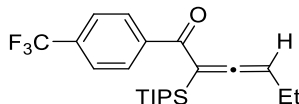

**1-(4-(trifluoromethyl)phenyl)-2-(triisopropylsilyl)hexa-2,3-dien-1-one (Scheme 2, entry 9).**

The title compound was prepared according to the **GP-2** from 4-(trifluoromethyl)benzaldehyde and (3-bromopent-1-yn-1-yl)triisopropylsilane, purified by flash column chromatography on silica gel: hexane, colorless liquid.

(*R,S*)-**L1**: 101 mg, 64% yield, 82% ee; (*S,R*)-**L1**: 98 mg, 62% yield, 82% ee.

HPLC analysis: The ee was determined on a CHIRALPAK: AD-3 column (0.5% *i*-PrOH in hexane, 1.0 mL/min); retention times for compound obtained using (*R,S*)-**L1**: 3.8 min (major), 4.1 min (minor).

$^1\text{H}$  NMR (500 MHz,  $\text{CDCl}_3$ )  $\delta$  7.94 – 7.90 (m, 2H), 7.70 – 7.65 (m, 2H), 5.06 (t,  $J = 7.2$  Hz, 1H), 2.10 (p,  $J = 7.4$  Hz, 2H), 1.41 – 1.34 (m, 3H), 1.12 (dd,  $J = 7.8, 2.8$  Hz, 18H), 0.97 (t,  $J = 7.5$  Hz, 3H).

$^{13}\text{C}$  NMR (126 MHz,  $\text{CDCl}_3$ )  $\delta$  216.3 (s), 195.5 (s), 141.5 (s), 133.3 (q,  $J = 32.5$  Hz), 129.4 (s), 125.0 (q,  $J = 3.7$  Hz), 123.8 (d,  $J = 272.5$  Hz), 98.4 (s), 89.6 (s), 21.4 (s), 18.7 (s, two carbons), 13.9 (s), 11.6 (s).

$^{19}\text{F}$  NMR (471 MHz,  $\text{CDCl}_3$ )  $\delta$  -63.00.

HRMS (ESI)  $m/z$   $[\text{M} + \text{H}]^+$  calcd for  $\text{C}_{22}\text{H}_{32}\text{F}_3\text{OSi}$ : 397.2174, found: 397.2170.

$[\alpha]^{24}_{\text{D}} = +4.0$  ( $c = 0.5$ ,  $\text{CHCl}_3$ ); 82% ee, from (*R,S*)-**L1**.

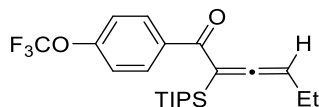

**1-(4-(trifluoromethoxy)phenyl)-2-(triisopropylsilyl)hexa-2,3-dien-1-one (Scheme 2, entry 10).** The title compound was prepared according to the **GP-2** from 4-(trifluoromethoxy)benzaldehyde and (3-bromopent-1-yn-1-yl)triisopropylsilane, purified by flash column chromatography on silica gel: hexane, colorless liquid.

(*R,S*)-**L1**: 93 mg, 56% yield, 84% ee; (*S,R*)-**L1**: 94 mg, 57% yield, 84% ee.

HPLC analysis: The ee was determined on a CHIRALCEL: OD-3 column (0.5% *i*-PrOH in hexane, 1.0 mL/min); retention times for compound obtained using (*R,S*)-**L1**: 3.5 min (major), 3.6 min (minor).

$^1\text{H}$  NMR (500 MHz,  $\text{CDCl}_3$ )  $\delta$  7.92 – 7.87 (m, 2H), 7.26 – 7.21 (m, 2H), 5.04 (t,  $J = 7.2$  Hz, 1H), 2.10 (p,  $J = 7.4$  Hz, 2H), 1.40 – 1.32 (m, 3H), 1.11 (dd,  $J = 7.5, 2.6$  Hz, 18H), 0.98 (t,  $J = 7.5$  Hz, 3H).

$^{13}\text{C}$  NMR (126 MHz,  $\text{CDCl}_3$ )  $\delta$  215.5 (s), 194.8 (s), 151.9 (d,  $J = 1.7$  Hz), 136.6 (s), 131.1 (s), 120.2 (d,  $J = 258.3$  Hz), 119.8 (s), 98.1 (s), 89.3 (s), 21.5 (s), 18.7 (s, two carbons), 14.0 (s), 11.6 (s).

$^{19}\text{F}$  NMR (471 MHz,  $\text{CDCl}_3$ )  $\delta$  -57.63.

HRMS (ESI)  $m/z$   $[M + H]^+$  calcd for  $C_{22}H_{32}F_3O_2Si$ : 413.2124, found: 413.2119.

$[\alpha]^{24}_D = +6.8$  ( $c = 0.5$ ,  $CHCl_3$ ); 84% ee, from (*R,S*)-**L1**.

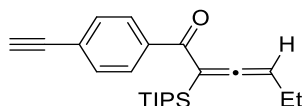

**1-(4-ethynylphenyl)-2-(triisopropylsilyl)hexa-2,3-dien-1-one (Scheme 2, entry 11).** The title compound was prepared according to the **GP-2** from 4-ethynylbenzaldehyde and (3-bromopent-1-yn-1-yl)triisopropylsilane, purified by flash column chromatography on silica gel: hexane, colorless liquid.

(*R,S*)-**L1**: 80 mg, 56% yield, 87% ee; (*S,R*)-**L1**: 77 mg, 54% yield, 87% ee.

HPLC analysis: The ee was determined on a CHIRALCEL: OD-3 column (0.5% *i*-PrOH in hexane, 1.0 mL/min); retention times for compound obtained using (*R,S*)-**L1**: 4.0 min (major), 4.1 min (minor).

$^1H$  NMR (500 MHz,  $CDCl_3$ )  $\delta$  7.80 (d,  $J = 8.4$  Hz, 2H), 7.52 (d,  $J = 8.4$  Hz, 2H), 5.02 (t,  $J = 7.2$  Hz, 1H), 3.20 (s, 1H), 2.09 (p,  $J = 7.4$  Hz, 2H), 1.35 (dt,  $J = 14.9, 7.5$  Hz, 3H), 1.11 (dd,  $J = 7.6, 3.3$  Hz, 18H), 0.97 (t,  $J = 7.5$  Hz, 3H).

$^{13}C$  NMR (126 MHz,  $CDCl_3$ )  $\delta$  215.5, 195.6, 138.3, 131.7, 129.1, 125.8, 98.1, 89.2, 83.0, 79.7, 21.5, 18.7 (two carbons), 14.0, 11.6.

HRMS (ESI)  $m/z$   $[M + H]^+$  calcd for  $C_{23}H_{33}OSi$ : 353.2301, found: 353.2294.

$[\alpha]^{24}_D = -37.6$  ( $c = 0.5$ ,  $CHCl_3$ ); 87% ee, from (*R,S*)-**L1**.

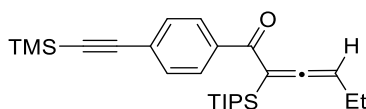

**2-(triisopropylsilyl)-1-(4-((trimethylsilyl)ethynyl)phenyl)hexa-2,3-dien-1-one (Scheme 2, entry 12).** The title compound was prepared according to the **GP-2** from 4-((trimethylsilyl)ethynyl)benzaldehyde and (3-bromopent-1-yn-1-yl)triisopropylsilane, purified by flash column chromatography on silica gel: hexane, colorless liquid.

(*R,S*)-**L1**: 90 mg, 53% yield, 87% ee; (*S,R*)-**L1**: 91 mg, 53% yield, 88% ee.

HPLC analysis: The ee was determined on a CHIRALCEL: OD-3 column (0.5% *i*-PrOH in hexane, 1.0 mL/min); retention times for compound obtained using (*R,S*)-**L1**: 3.4 min (major), 3.4 min (minor).

$^1H$  NMR (500 MHz,  $CDCl_3$ )  $\delta$  7.79 – 7.76 (m, 2H), 7.51 – 7.46 (m, 2H), 5.01 (t,  $J = 7.2$  Hz, 1H), 2.08 (p,  $J = 7.4$  Hz, 2H), 1.35 (dt,  $J = 11.3, 7.5$  Hz, 3H), 1.10 (dd,  $J = 7.6, 3.7$  Hz, 18H), 0.97 (t,  $J = 7.5$  Hz, 3H), 0.25 (s, 9H).

$^{13}C$  NMR (126 MHz,  $CDCl_3$ )  $\delta$  215.3, 195.6, 137.9, 131.5, 129.1, 126.8, 104.3, 98.1, 97.2, 89.1, 21.5, 18.7 (two carbons), 14.0, 11.6, -0.2.

HRMS (ESI)  $m/z$   $[M + H]^+$  calcd for  $C_{26}H_{41}OSi_2$ : 425.2696, found: 425.2691.

$[\alpha]^{24}_D = +18.8$  ( $c = 0.5$ ,  $CHCl_3$ ); 88% ee, from (*R,S*)-**L1**.

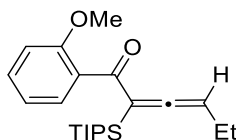

**1-(2-methoxyphenyl)-2-(triisopropylsilyl)hexa-2,3-dien-1-one (Scheme 2, entry 13).** The title compound was prepared according to the **GP-2** from 2-methoxybenzaldehyde and (3-bromopent-1-yn-1-yl)triisopropylsilane, purified by flash column chromatography on silica gel: hexane, colorless liquid.

(*R,S*)-**L1**: 58 mg, 40% yield, 77% ee; (*S,R*)-**L1**: 65 mg, 45% yield, 77% ee.

HPLC analysis: The ee was determined on a CHIRALPAK: AD-3 column (0.5% *i*-PrOH in hexane, 1.0 mL/min); retention times for compound obtained using (*R,S*)-**L1**: 8.0 min (major), 9.8 min (minor).

$^1\text{H}$  NMR (500 MHz,  $\text{CDCl}_3$ )  $\delta$  7.34 – 7.29 (m, 1H), 7.27 – 7.22 (m, 1H), 6.94 – 6.89 (m, 1H), 6.88 – 6.84 (m, 1H), 4.92 (t,  $J$  = 7.1 Hz, 1H), 3.78 (s, 3H), 1.92 (p,  $J$  = 7.3 Hz, 2H), 1.42 – 1.34 (m, 3H), 1.12 (d,  $J$  = 7.8 Hz, 18H), 0.81 (t,  $J$  = 7.5 Hz, 3H).

$^{13}\text{C}$  NMR (126 MHz,  $\text{CDCl}_3$ )  $\delta$  219.2, 198.9, 156.6, 131.1, 130.7, 128.6, 119.7, 110.7, 101.1, 89.3, 55.3, 20.9, 18.7 (two carbons), 13.9, 11.6.

HRMS (ESI)  $m/z$   $[\text{M} + \text{H}]^+$  calcd for  $\text{C}_{22}\text{H}_{35}\text{O}_2\text{Si}$ : 359.2406, found: 359.2397.

$[\alpha]^{24}_{\text{D}} = -8.0$  ( $c$  = 0.5,  $\text{CHCl}_3$ ); 77% ee, from (*R,S*)-**L1**.

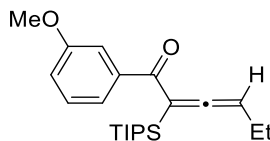

**1-(3-methoxyphenyl)-2-(triisopropylsilyl)hexa-2,3-dien-1-one (Scheme 2, entry 14).** The title compound was prepared according to the **GP-2** from 3-methoxybenzaldehyde and (3-bromopent-1-yn-1-yl)triisopropylsilane, purified by flash column chromatography on silica gel: hexane, colorless liquid.

(*R,S*)-**L1**: 98 mg, 68% yield, 90% ee; (*S,R*)-**L1**: 100 mg, 69% yield, 90% ee.

HPLC analysis: The ee was determined on a CHIRALCEL: OD-3 column (0.5% *i*-PrOH in hexane, 1.0 mL/min); retention times for compound obtained using (*R,S*)-**L1**: 4.4 min (major), 4.7 min (minor).

$^1\text{H}$  NMR (500 MHz,  $\text{CDCl}_3$ )  $\delta$  7.46 (d,  $J$  = 7.6 Hz, 1H), 7.41 – 7.38 (m, 1H), 7.31 (t,  $J$  = 7.9 Hz, 1H), 7.06 (dd,  $J$  = 8.1, 2.2 Hz, 1H), 5.02 (t,  $J$  = 7.2 Hz, 1H), 3.84 (s, 3H), 2.11 (p,  $J$  = 7.4 Hz, 2H), 1.39 – 1.32 (m, 3H), 1.11 (dd,  $J$  = 7.5, 4.4 Hz, 18H), 0.98 (t,  $J$  = 7.5 Hz, 3H).

$^{13}\text{C}$  NMR (126 MHz,  $\text{CDCl}_3$ )  $\delta$  215.0, 196.1, 159.4, 139.7, 128.8, 122.2, 118.7, 113.5, 98.0, 88.9, 55.3, 21.6, 18.7 (two carbons), 14.1, 11.7.

HRMS (ESI)  $m/z$   $[\text{M} + \text{H}]^+$  calcd for  $\text{C}_{22}\text{H}_{35}\text{O}_2\text{Si}$ : 359.2406, found: 359.2407.

$[\alpha]^{24}_{\text{D}} = -0.8$  ( $c$  = 0.5,  $\text{CHCl}_3$ ); 90% ee, from (*R,S*)-**L1**.



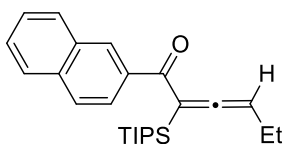

**1-(naphthalen-2-yl)-2-(triisopropylsilyl)hexa-2,3-dien-1-one (Scheme 2, entry 15).** The title compound was prepared according to the **GP-2** from 2-naphthaldehyde and (3-bromopent-1-yn-1-yl)triisopropylsilane, purified by flash column chromatography on silica gel: hexane, colorless liquid.

(*R,S*)-**L1**: 111 mg, 73% yield, 93% ee; (*S,R*)-**L1**: 107 mg, 71% yield, 93% ee.

HPLC analysis: The ee was determined on a CHIRALPAK: AD-3 column (0.5% *i*-PrOH in hexane, 1.0 mL/min); retention times for compound obtained using (*R,S*)-**L1**: 6.3 min (major), 7.3 min (minor).

<sup>1</sup>H NMR (500 MHz, CDCl<sub>3</sub>) δ 8.46 (s, 1H), 7.99 (dd, *J* = 8.6, 1.6 Hz, 1H), 7.95 (d, *J* = 8.0 Hz, 1H), 7.90 – 7.86 (m, 2H), 7.60 – 7.51 (m, 2H), 5.06 (t, *J* = 7.2 Hz, 1H), 2.17 (p, *J* = 7.4 Hz, 2H), 1.47 – 1.40 (m, 3H), 1.23 – 1.15 (m, 18H), 1.00 (t, *J* = 7.5 Hz, 3H).

<sup>13</sup>C NMR (126 MHz, CDCl<sub>3</sub>) δ 215.1, 196.1, 135.5, 135.2, 132.3, 130.9, 129.4, 127.9, 127.8, 127.7, 126.4, 125.3, 98.1, 88.8, 21.5, 18.7 (two carbons), 14.1, 11.7.

HRMS (ESI) *m/z* [M + H]<sup>+</sup> calcd for C<sub>25</sub>H<sub>35</sub>OSi: 379.2457, found: 379.2454.

[α]<sub>D</sub><sup>24</sup> = -10.4 (*c* = 0.5, CHCl<sub>3</sub>); 93% ee, from (*R,S*)-**L1**.

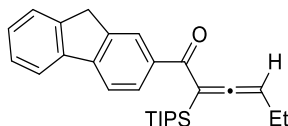

**1-(9H-fluoren-2-yl)-2-(triisopropylsilyl)hexa-2,3-dien-1-one (Scheme 2, entry 16).** The title compound was prepared according to the **GP-2** from 9H-fluorene-2-carbaldehyde and (3-bromopent-1-yn-1-yl)triisopropylsilane, purified by flash column chromatography on silica gel: hexane, white solid.

(*R,S*)-**L1**: 102 mg, 61% yield, 92% ee; (*S,R*)-**L1**: 105 mg, 63% yield, 92% ee.

HPLC analysis: The ee was determined on a CHIRALPAK: AD-3 column (1% *i*-PrOH in hexane, 1.0 mL/min); retention times for compound obtained using (*R,S*)-**L1**: 5.9 min (major), 6.5 min (minor).

<sup>1</sup>H NMR (500 MHz, CDCl<sub>3</sub>) δ 8.08 (s, 1H), 7.96 (d, *J* = 7.9 Hz, 1H), 7.85 – 7.79 (m, 2H), 7.58 (d, *J* = 7.3 Hz, 1H), 7.43 – 7.34 (m, 2H), 5.04 (t, *J* = 7.2 Hz, 1H), 3.95 (s, 2H), 2.15 (p, *J* = 7.4 Hz, 2H), 1.44 – 1.37 (m, 3H), 1.18 – 1.14 (m, 18H), 1.01 (t, *J* = 7.5 Hz, 3H).

<sup>13</sup>C NMR (126 MHz, CDCl<sub>3</sub>) δ 214.6, 196.1, 145.6, 144.4, 142.8, 140.7, 136.8, 128.9, 127.7, 126.9, 126.0, 125.2, 120.7, 119.1, 98.2, 88.7, 36.9, 21.6, 18.8, 18.7, 14.1, 11.7.

HRMS (ESI) *m/z* [M + H]<sup>+</sup> calcd for C<sub>28</sub>H<sub>37</sub>OSi: 417.2614, found: 417.2610.

[α]<sub>D</sub><sup>24</sup> = +8.0 (*c* = 0.5, CHCl<sub>3</sub>); 92% ee, from (*R,S*)-**L1**.

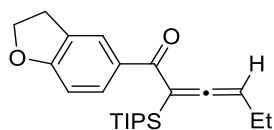

**1-(2,3-dihydrobenzofuran-5-yl)-2-(triisopropylsilyl)hexa-2,3-dien-1-one (Scheme 2, entry 17).** The title compound was prepared according to the **GP-2** from 2,3-dihydrobenzofuran-5-carbaldehyde and (3-bromopent-1-yn-1-yl)triisopropylsilane, purified by flash column chromatography on silica gel: hexane, colorless liquid.

(*R,S*)-**L1**: 92 mg, 62% yield, 90% ee; (*S,R*)-**L1**: 93 mg, 62% yield, 89% ee.

HPLC analysis: The ee was determined on a CHIRALPAK: AD-3 column (0.5% *i*-PrOH in hexane, 1.0 mL/min); retention times for compound obtained using (*R,S*)-**L1**: 7.2 min (major), 8.0 min (minor).

$^1\text{H}$  NMR (500 MHz,  $\text{CDCl}_3$ )  $\delta$  7.78 (m, 2H), 6.76 (d,  $J$  = 8.3 Hz, 1H), 4.98 (t,  $J$  = 7.2 Hz, 1H), 4.63 (t,  $J$  = 10.0, 7.6 Hz, 2H), 3.23 (t,  $J$  = 8.7 Hz, 2H), 2.11 (p,  $J$  = 7.4 Hz, 2H), 1.34 (dt,  $J$  = 14.9, 7.5 Hz, 3H), 1.11 (dd,  $J$  = 7.6, 4.6 Hz, 18H), 1.00 (t,  $J$  = 7.5 Hz, 3H).

$^{13}\text{C}$  NMR (126 MHz,  $\text{CDCl}_3$ )  $\delta$  213.4, 194.5, 163.9, 131.6, 131.2, 127.2, 126.5, 108.4, 97.7, 88.3, 72.0, 29.1, 21.6, 18.7 (two carbons), 14.1, 11.7.

HRMS (ESI)  $m/z$   $[\text{M} + \text{H}]^+$  calcd for  $\text{C}_{23}\text{H}_{35}\text{O}_2\text{Si}$ : 371.2406, found: 371.2404.

$[\alpha]^{24}_{\text{D}} = +9.2$  ( $c$  = 0.5,  $\text{CHCl}_3$ ); 90% ee, from (*R,S*)-**L1**.

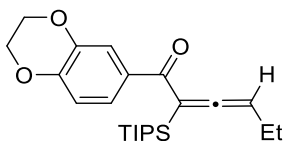

**1-(2,3-dihydrobenzo[b][1,4]dioxin-6-yl)-2-(triisopropylsilyl)hexa-2,3-dien-1-one (Scheme 2, entry 18).** The title compound was prepared according to the **GP-2** from 2,3-dihydrobenzo[b][1,4]dioxine-6-carbaldehyde and (3-bromopent-1-yn-1-yl)triisopropylsilane, purified by flash column chromatography on silica gel: hexane, colorless liquid.

(*R,S*)-**L1**: 92 mg, 59% yield, 91% ee; (*S,R*)-**L1**: 90 mg, 58% yield, 91% ee.

HPLC analysis: The ee was determined on a CHIRALPAK: AD-3 column (1% *i*-PrOH in hexane, 1.0 mL/min); retention times for compound obtained using (*R,S*)-**L1**: 6.0 min (major), 6.6 min (minor).

$^1\text{H}$  NMR (500 MHz,  $\text{CDCl}_3$ )  $\delta$  7.45 (d,  $J$  = 8.2 Hz, 2H), 6.87 (d,  $J$  = 8.1 Hz, 1H), 5.00 (t,  $J$  = 7.2 Hz, 1H), 4.28 (dd,  $J$  = 14.8, 4.4 Hz, 4H), 2.12 (p,  $J$  = 7.3 Hz, 2H), 1.33 (dt,  $J$  = 14.8, 7.4 Hz, 3H), 1.10 (dd,  $J$  = 7.4, 3.9 Hz, 18H), 1.00 (t,  $J$  = 7.4 Hz, 3H).

$^{13}\text{C}$  NMR (126 MHz,  $\text{CDCl}_3$ )  $\delta$  213.8, 194.4, 147.4, 142.8, 131.7, 123.5, 119.0, 116.7, 97.5, 88.5, 64.6, 64.1, 21.6, 18.7 (two carbons), 14.1, 11.6.

HRMS (ESI)  $m/z$   $[\text{M} + \text{H}]^+$  calcd for  $\text{C}_{23}\text{H}_{35}\text{O}_3\text{Si}$ : 387.2355, found: 387.2351.

$[\alpha]^{24}_{\text{D}} = +14.0$  ( $c$  = 0.5,  $\text{CHCl}_3$ ); 91% ee, from (*R,S*)-**L1**.

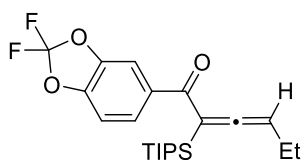

**1-(2,2-difluorobenzo[d][1,3]dioxol-5-yl)-2-(triisopropylsilyl)hexa-2,3-dien-1-one (Scheme 2, entry 19).** The title compound was prepared according to the **GP-2** from 2,2-difluorobenzo[d][1,3]dioxole-5-carbaldehyde and (3-bromopent-1-yn-1-yl)triisopropylsilane, purified by flash column chromatography on silica gel: hexane, colorless liquid.

(*R,S*)-**L1**: 90 mg, 55% yield, 92% ee; (*S,R*)-**L1**: 85 mg, 52% yield, 91% ee.

HPLC analysis: The ee was determined on a CHIRALCEL: OD-3 column (0.5% *i*-PrOH in hexane, 1.0 mL/min); retention times for compound obtained using (*R,S*)-**L1**: 3.7 min (major), 4.2 min (minor).

$^1\text{H}$  NMR (500 MHz,  $\text{CDCl}_3$ )  $\delta$  7.71 (dd,  $J$  = 8.3, 1.6 Hz, 1H), 7.60 (d,  $J$  = 1.5 Hz, 1H), 7.08 (d,  $J$  = 8.3 Hz, 1H), 5.06 (t,  $J$  = 7.2 Hz, 1H), 2.11 (p,  $J$  = 7.4 Hz, 2H), 1.38 – 1.31 (m, 3H), 1.11 (dd,  $J$  = 7.7, 1.9 Hz, 18H), 1.00 (t,  $J$  = 7.5 Hz, 3H).

$^{13}\text{C}$  NMR (126 MHz,  $\text{CDCl}_3$ )  $\delta$  214.7 (s), 193.7 (s), 146.5 (s), 143.7 (s), 134.6 (s), 131.7 (t,  $J$  = 256.8 Hz), 126.4 (s), 110.4 (s), 108.6 (s), 97.8 (s), 89.2 (s), 21.5 (s), 18.7 (s), 18.6 (s), 14.0 (s), 11.6 (s).

$^{19}\text{F}$  NMR (471 MHz,  $\text{CDCl}_3$ )  $\delta$  -49.79.

HRMS (ESI)  $m/z$   $[\text{M} + \text{H}]^+$  calcd for  $\text{C}_{22}\text{H}_{31}\text{F}_2\text{O}_3\text{Si}$ : 409.2010, found: 409.2008.

$[\alpha]^{24}_{\text{D}} = +16.0$  ( $c$  = 0.5,  $\text{CHCl}_3$ ); 92% ee, from (*R,S*)-**L1**.

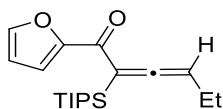

**1-(furan-2-yl)-2-(triisopropylsilyl)hexa-2,3-dien-1-one (Scheme 2, entry 20).** The title compound was prepared according to the **GP-2** from furan-2-carbaldehyde and (3-bromopent-1-yn-1-yl)triisopropylsilane, purified by flash column chromatography on silica gel: hexane, colorless liquid.

(*R,S*)-**L1**: 63 mg, 49% yield, 66% ee; (*S,R*)-**L1**: 64 mg, 50% yield, 67% ee.

HPLC analysis: The ee was determined on a CHIRALPAK: AD-3 column (0.5% *i*-PrOH in hexane, 1.0 mL/min); retention times for compound obtained using (*R,S*)-**L1**: 5.1 min (major), 5.4 min (minor).

$^1\text{H}$  NMR (500 MHz,  $\text{CDCl}_3$ )  $\delta$  7.56 (d,  $J$  = 0.9 Hz, 1H), 7.16 (d,  $J$  = 3.5 Hz, 1H), 6.47 (dd,  $J$  = 3.5, 1.7 Hz, 1H), 5.14 (t,  $J$  = 7.1 Hz, 1H), 2.17 (p,  $J$  = 7.4 Hz, 2H), 1.35 – 1.29 (m, 3H), 1.10 – 1.04 (m, 21H).

$^{13}\text{C}$  NMR (126 MHz,  $\text{CDCl}_3$ )  $\delta$  214.4, 182.7, 152.2, 146.2, 118.4, 111.6, 97.4, 89.0, 21.6, 18.6 (two carbons), 14.0, 11.5.

HRMS (ESI)  $m/z$   $[\text{M} + \text{H}]^+$  calcd for  $\text{C}_{19}\text{H}_{31}\text{O}_2\text{Si}$ : 319.2093, found: 319.2090.

$[\alpha]^{24}_{\text{D}} = -30.8$  ( $c$  = 0.5,  $\text{CHCl}_3$ ); 66% ee, from (*R,S*)-**L1**.

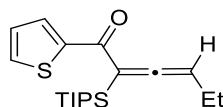

**1-(thiophen-2-yl)-2-(triisopropylsilyl)hexa-2,3-dien-1-one (Scheme 2, entry 21).** The title compound was prepared according to the **GP-2** from thiophene-2-carbaldehyde and (3-bromopent-1-yn-1-yl)triisopropylsilane, purified by flash column chromatography on silica gel: hexane, colorless liquid.

(*R,S*)-**L1**: 74 mg, 55% yield, 91% ee; (*S,R*)-**L1**: 75 mg, 56% yield, 90% ee.

HPLC analysis: The ee was determined on a CHIRALPAK: AD-3 column (0.5% *i*-PrOH in hexane, 1.0 mL/min); retention times for compound obtained using (*R,S*)-**L1**: 4.2 min (major), 4.4 min (minor).

$^1\text{H}$  NMR (500 MHz,  $\text{CDCl}_3$ )  $\delta$  7.79 – 7.74 (m, 1H), 7.59 – 7.55 (m, 1H), 7.10 – 7.06 (m, 1H), 5.15 (t,  $J = 7.2$  Hz, 1H), 2.19 (p,  $J = 7.4$  Hz, 2H), 1.34 (dt,  $J = 14.9, 7.5$  Hz, 3H), 1.12 – 1.04 (m, 21H).

$^{13}\text{C}$  NMR (126 MHz,  $\text{CDCl}_3$ )  $\delta$  213.7, 187.1, 144.1, 133.1, 132.9, 127.6, 98.5, 89.6, 21.8, 18.6 (two carbons), 14.0, 11.6.

HRMS (ESI)  $m/z$   $[\text{M} + \text{H}]^+$  calcd for  $\text{C}_{19}\text{H}_{31}\text{OSSi}$ : 335.1865, found: 335.1859.

$[\alpha]^{24}_{\text{D}} = +31.6$  ( $c = 0.5$ ,  $\text{CHCl}_3$ ); 91% ee, from (*R,S*)-**L1**.

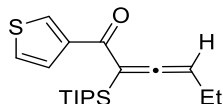

**1-(thiophen-3-yl)-2-(triisopropylsilyl)hexa-2,3-dien-1-one (Scheme 2, entry 22).** The title compound was prepared according to the **GP-2** from thiophene-3-carbaldehyde and (3-bromopent-1-yn-1-yl)triisopropylsilane, purified by flash column chromatography on silica gel: hexane, colorless liquid.

(*R,S*)-**L1**: 81 mg, 60% yield, 91% ee; (*S,R*)-**L1**: 82 mg, 61% yield, 91% ee.

HPLC analysis: The ee was determined on a CHIRALPAK: AD-3 column (0.5% *i*-PrOH in hexane, 1.0 mL/min); retention times for compound obtained using (*R,S*)-**L1**: 4.6 min (major), 5.0 min (minor).

$^1\text{H}$  NMR (500 MHz,  $\text{CDCl}_3$ )  $\delta$  8.03 (s, 1H), 7.52 (d,  $J = 4.8$  Hz, 1H), 7.28 – 7.24 (m, 1H), 5.09 (t,  $J = 7.0$  Hz, 1H), 2.15 (p,  $J = 7.1$  Hz, 2H), 1.38 – 1.31 (m, 3H), 1.10 (d,  $J = 7.9$  Hz, 18H), 1.04 (t,  $J = 7.4$  Hz, 3H).

$^{13}\text{C}$  NMR (126 MHz,  $\text{CDCl}_3$ )  $\delta$  214.2, 189.3, 142.4, 132.4, 128.0, 125.4, 99.0, 89.0, 21.8, 18.7, 18.6, 14.0, 11.6.

HRMS (ESI)  $m/z$   $[\text{M} + \text{H}]^+$  calcd for  $\text{C}_{19}\text{H}_{30}\text{OSSi}$ : 335.1865, found: 335.1859.

$[\alpha]^{24}_{\text{D}} = +31.2$  ( $c = 0.5$ ,  $\text{CHCl}_3$ ); 91% ee, from (*R,S*)-**L1**.

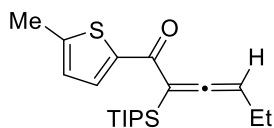

**1-(5-methylthiophen-2-yl)-2-(triisopropylsilyl)hexa-2,3-dien-1-one (Scheme 2, entry 23).**

The title compound was prepared according to the **GP-2** from 5-methylthiophene-2-carbaldehyde and (3-bromopent-1-yn-1-yl)triisopropylsilane, purified by flash column chromatography on silica gel: hexane, colorless liquid.

(*R,S*)-**L1**: 67 mg, 48% yield, 93% ee; (*S,R*)-**L1**: 70 mg, 50% yield, 93% ee.

HPLC analysis: The ee was determined on a CHIRALPAK: AD-3 column (0.5% *i*-PrOH in hexane, 1.0 mL/min); retention times for compound obtained using (*R,S*)-**L1**: 4.4 min (major), 4.8 min (minor).

<sup>1</sup>H NMR (500 MHz, CDCl<sub>3</sub>) δ 7.58 (s, 1H), 6.76 (s, 1H), 5.10 (t, *J* = 7.1 Hz, 1H), 2.51 (s, 3H), 2.17 (p, *J* = 7.2 Hz, 2H), 1.32 (dt, *J* = 14.7, 7.3 Hz, 3H), 1.11 – 1.04 (m, 21H).

<sup>13</sup>C NMR (126 MHz, CDCl<sub>3</sub>) δ 213.1, 186.8, 149.1, 141.9, 133.6, 126.4, 98.1, 89.3, 21.9, 18.6 (two carbons), 15.9, 14.0, 11.6.

HRMS (ESI) *m/z* [M + H]<sup>+</sup> calcd for C<sub>20</sub>H<sub>33</sub>OSSi: 349.2021, found: 349.2016.

[α]<sub>D</sub><sup>24</sup> = +42.4 (*c* = 0.5, CHCl<sub>3</sub>); 93% ee, from (*R,S*)-**L1**.

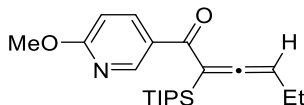

**1-(6-methoxypyridin-3-yl)-2-(triisopropylsilyl)hexa-2,3-dien-1-one (Scheme 2, entry 24).**

The title compound was prepared according to the **GP-2** from 6-methoxynicotinaldehyde and (3-bromopent-1-yn-1-yl)triisopropylsilane, purified by flash column chromatography on silica gel: hexane, colorless liquid.

(*R,S*)-**L1**: 107 mg, 74% yield, 94% ee; (*S,R*)-**L1**: 108 mg, 75% yield, 94% ee.

HPLC analysis: The ee was determined on a CHIRALCEL: OD-3 column (0.5% *i*-PrOH in hexane, 1.0 mL/min); retention times for compound obtained using (*R,S*)-**L1**: 4.6 min (major), 4.9 min (minor).

<sup>1</sup>H NMR (500 MHz, CDCl<sub>3</sub>) δ 8.74 (d, *J* = 2.3 Hz, 1H), 8.05 (dd, *J* = 8.7, 2.4 Hz, 1H), 6.74 (d, *J* = 8.7 Hz, 1H), 5.06 (t, *J* = 7.2 Hz, 1H), 3.97 (s, 3H), 2.10 (p, *J* = 7.4 Hz, 2H), 1.32 (dt, *J* = 14.9, 7.5 Hz, 3H), 1.08 (d, *J* = 7.9 Hz, 18H), 0.98 (t, *J* = 7.5 Hz, 3H).

<sup>13</sup>C NMR (126 MHz, CDCl<sub>3</sub>) δ 214.5, 193.5, 166.2, 150.1, 139.3, 127.6, 110.7, 97.9, 89.1, 53.9, 21.5, 18.7, 18.6, 14.1, 11.8, 11.6.

HRMS (ESI) *m/z* [M + H]<sup>+</sup> calcd for C<sub>21</sub>H<sub>34</sub>NO<sub>2</sub>Si: 360.2359, found: 360.2358.

[α]<sub>D</sub><sup>24</sup> = -48.4 (*c* = 0.5, CHCl<sub>3</sub>); 94% ee, from (*S,R*)-**L1**.

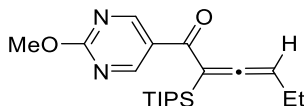

**1-(2-methoxypyrimidin-5-yl)-2-(triisopropylsilyl)hexa-2,3-dien-1-one (Scheme 2, entry 25).**

The title compound was prepared according to the **GP-2** from 2-methoxypyrimidine-5-carbaldehyde and (3-bromopent-1-yn-1-yl)triisopropylsilane, purified by flash column chromatography on silica gel: hexane, colorless liquid.

(*R,S*)-**L1**: 95 mg, 65% yield, 90% ee; (*S,R*)-**L1**: 96 mg, 66% yield, 90% ee.

HPLC analysis: The ee was determined on a CHIRALCEL: OD-3 column (0.5% *i*-PrOH in hexane, 1.0 mL/min); retention times for compound obtained using (*R,S*)-**L1**: 8.9 min (major), 12.5 min (minor).

<sup>1</sup>H NMR (500 MHz, CDCl<sub>3</sub>) δ 8.94 (s, 2H), 5.13 (t, *J* = 7.2 Hz, 1H), 4.05 (s, 3H), 2.15 – 2.08 (m, 2H), 1.32 (dt, *J* = 14.9, 7.4 Hz, 3H), 1.07 (d, *J* = 7.7 Hz, 18H), 0.99 (t, *J* = 7.4 Hz, 3H).

<sup>13</sup>C NMR (126 MHz, CDCl<sub>3</sub>) δ 215.9, 191.8, 166.6, 160.8, 125.7, 98.3, 90.0, 55.5, 21.5, 18.6 (two carbons), 13.9, 11.5.

HRMS (ESI) *m/z* [M + H]<sup>+</sup> calcd for C<sub>20</sub>H<sub>33</sub>N<sub>2</sub>O<sub>2</sub>Si: 361.2311, found: 361.2308.

[α]<sub>D</sub><sup>24</sup> = +29.6 (*c* = 0.5, CHCl<sub>3</sub>); 90% ee, from (*R,S*)-**L1**.

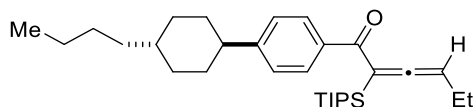

**1-(4-(4-butylcyclohexyl)phenyl)-2-(triisopropylsilyl)hexa-2,3-dien-1-one (Scheme 2, entry 26).** The title compound was prepared according to the **GP-2** from 4-(4-butylcyclohexyl)benzaldehyde and (3-bromopent-1-yn-1-yl)triisopropylsilane, purified by flash column chromatography on silica gel: hexane, colorless liquid.

(*R,S*)-**L1**: 110 mg, 59% yield, 90% de; (*S,R*)-**L1**: 112 mg, 60% yield, 90% de.

HPLC analysis: The de was determined on a CHIRALPAK: AD-3 column (0.5% *i*-PrOH in hexane, 1.0 mL/min); retention times for compound obtained using (*R,S*)-**L1**: 5.0 min (major), 5.7 min (minor).

<sup>1</sup>H NMR (500 MHz, CDCl<sub>3</sub>) δ 7.81 (d, *J* = 8.1 Hz, 2H), 7.24 (d, *J* = 8.1 Hz, 2H), 4.99 (t, *J* = 7.2 Hz, 1H), 2.50 (dd, *J* = 16.7, 7.5 Hz, 1H), 2.11 (p, *J* = 7.4 Hz, 2H), 1.89 (t, *J* = 11.2 Hz, 4H), 1.46 (dd, *J* = 22.8, 12.3 Hz, 2H), 1.39 – 1.23 (m, 10H), 1.14 – 1.08 (m, 20H), 0.98 (t, *J* = 7.4 Hz, 3H), 0.90 (t, *J* = 6.6 Hz, 3H).

<sup>13</sup>C NMR (126 MHz, CDCl<sub>3</sub>) δ 214.5, 195.8, 152.6, 136.0, 129.6, 126.5, 97.8, 88.6, 44.7, 37.2, 37.1, 34.0, 33.5, 29.2, 23.0, 21.6, 18.7 (two carbons), 14.1 (two carbons), 11.7.

HRMS (ESI) *m/z* [M + H]<sup>+</sup> calcd for C<sub>31</sub>H<sub>51</sub>OSi: 467.3709, found: 467.3706.

[α]<sub>D</sub><sup>24</sup> = +6.0 (*c* = 0.5, CHCl<sub>3</sub>); 90% de, from (*R,S*)-**L1**.

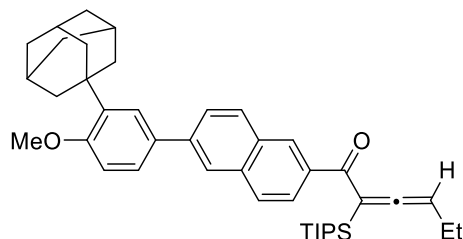

**1-(6-(3-(adamantan-1-yl)-4-methoxyphenyl)naphthalen-2-yl)-2-(triisopropylsilyl)hexa-2,3-dien-1-one (Scheme 2, entry 27).** The title compound was prepared according to the **GP-2** from 6-(3-(adamantan-1-yl)-4-methoxyphenyl)-2-naphthaldehyde and (3-bromopent-1-yn-1-yl)triisopropylsilane, purified by flash column chromatography on silica gel: hexane, white solid.

(*R,S*)-**L1**: 119 mg, 48% yield, 91% ee; (*S,R*)-**L1**: 117 mg, 47% yield, 90% ee.

HPLC analysis: The ee was determined on a CHIRALPAK: AD-3 column (3% *i*-PrOH in hexane, 1.0 mL/min); retention times for compound obtained using (*R,S*)-**L1**: 5.4 min (major), 6.6 min (minor).

<sup>1</sup>H NMR (500 MHz, CDCl<sub>3</sub>) δ 8.46 (s, 1H), 8.03 (s, 1H), 8.01 – 7.97 (m, 2H), 7.93 (d, *J* = 8.6 Hz, 1H), 7.81 (dd, *J* = 8.5, 1.6 Hz, 1H), 7.63 (d, *J* = 2.2 Hz, 1H), 7.56 (dd, *J* = 8.4, 2.2 Hz, 1H), 7.01 (d, *J* = 8.5 Hz, 1H), 5.08 (t, *J* = 7.2 Hz, 1H), 3.91 (s, 3H), 2.24 – 2.11 (m, 11H), 1.87 – 1.80 (m, 6H), 1.45 (dt, *J* = 14.9, 7.5 Hz, 3H), 1.19 (t, *J* = 7.5 Hz, 18H), 1.03 (t, *J* = 7.5 Hz, 3H).

<sup>13</sup>C NMR (126 MHz, CDCl<sub>3</sub>) δ 214.9, 196.0, 158.8, 141.2, 138.9, 135.7, 135.1, 132.6, 131.0, 130.8, 129.8, 127.9, 126.3, 125.9, 125.7 (two carbons), 124.7, 112.1, 98.1, 88.8, 55.1, 40.6, 37.2, 37.1, 29.1, 21.6, 18.8, 18.7, 14.1, 11.7.

HRMS (ESI) *m/z* [M + H]<sup>+</sup> calcd for C<sub>42</sub>H<sub>55</sub>O<sub>2</sub>Si: 619.3972, found: 619.3968.

[α]<sub>D</sub><sup>24</sup> = -3.6 (*c* = 0.5, CHCl<sub>3</sub>); 91% ee, from (*R,S*)-**L1**.

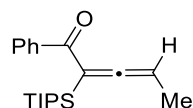

**1-phenyl-2-(triisopropylsilyl)penta-2,3-dien-1-one (Scheme 3, entry 28).** The title compound was prepared according to the **GP-2** from benzaldehyde and (3-bromobut-1-yn-1-yl)triisopropylsilane, purified by flash column chromatography on silica gel: hexane, colorless liquid.

(*R,S*)-**L1**: 80 mg, 63% yield, 87% ee; (*S,R*)-**L1**: 83 mg, 66% yield, 87% ee.

HPLC analysis: The ee was determined on a CHIRALPAK: AD-3 column (0.5% *i*-PrOH in hexane, 1.0 mL/min); retention times for compound obtained using (*R,S*)-**L1**: 4.3 min (major), 4.6 min (minor).

<sup>1</sup>H NMR (500 MHz, CDCl<sub>3</sub>) δ 7.91 – 7.85 (m, 2H), 7.54 – 7.49 (m, 1H), 7.45 – 7.39 (m, 2H), 5.00 (q, *J* = 7.2 Hz, 1H), 1.70 (d, *J* = 7.3 Hz, 3H), 1.40 – 1.33 (m, 3H), 1.15 – 1.10 (m, 18H).

<sup>13</sup>C NMR (126 MHz, CDCl<sub>3</sub>) δ 216.1, 196.3, 138.4, 132.2, 129.3, 128.0, 97.1, 81.7, 18.7 (two carbons), 12.7, 11.6.

HRMS (ESI) *m/z* [M + H]<sup>+</sup> calcd for C<sub>20</sub>H<sub>31</sub>OSi: 315.2144, found: 315.2136.

[α]<sub>D</sub><sup>24</sup> = -21.6 (*c* = 0.5, CHCl<sub>3</sub>); 87% ee, from (*R,S*)-**L1**.

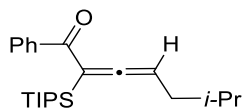

**6-methyl-1-phenyl-2-(triisopropylsilyl)hepta-2,3-dien-1-one (Scheme 3, entry 29).** The title compound was prepared according to the **GP-2** from benzaldehyde and (3-bromo-5-methylhex-1-yn-1-yl)triisopropylsilane, purified by flash column chromatography on silica gel: hexane, colorless liquid.

(*R,S*)-**L1**: 90 mg, 63% yield, 92% ee; (*S,R*)-**L1**: 91 mg, 63% yield, 93% ee.

HPLC analysis: The ee was determined on a CHIRALPAK: AD-3 column (0.5% *i*-PrOH in

hexane, 1.0 mL/min); retention times for compound obtained using (*R,S*)-**L1**: 4.0 min (major), 4.2 min (minor).

<sup>1</sup>H NMR (500 MHz, CDCl<sub>3</sub>) δ 7.88 – 7.82 (m, 2H), 7.52 – 7.47 (m, 1H), 7.43 – 7.37 (m, 2H), 4.98 (t, *J* = 7.7 Hz, 1H), 2.05 – 1.90 (m, 2H), 1.55 (dp, *J* = 13.4, 6.7 Hz, 1H), 1.41 – 1.33 (m, 3H), 1.12 (d, *J* = 7.6 Hz, 18H), 0.81 (d, *J* = 6.7 Hz, 3H), 0.75 (d, *J* = 6.7 Hz, 3H).

<sup>13</sup>C NMR (126 MHz, CDCl<sub>3</sub>) δ 215.9, 196.6, 138.5, 132.0, 129.3, 128.0, 97.1, 86.0, 37.2, 28.8, 22.1, 21.89, 18.7 (two carbons), 11.6.

HRMS (ESI)  $m/z$   $[M + H]^+$  calcd for  $C_{23}H_{37}OSi$ : 357.2614, found: 357.2606.

$[\alpha]^{24}_{\text{D}} = +14.0$  ( $c = 0.5$ ,  $\text{CHCl}_3$ ); 92% ee, from (*R,S*)-**L1**.

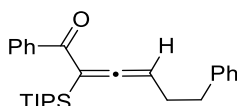

**1,6-diphenyl-2-(triisopropylsilyl)hexa-2,3-dien-1-one** (Scheme 3, entry 30). The title compound was prepared according to the **GP-2** from benzaldehyde and (3-bromo-5-phenylpent-1-yn-1-yl)triisopropylsilane, purified by flash column chromatography on silica gel: hexane, colorless liquid.

(*R,S*)-L1: 104 mg, 64% yield, 90% ee; (*S,R*)-L1: 107 mg, 66% yield, 90% ee.

HPLC analysis: The ee was determined on a CHIRALPAK: AD-3 column (0.5% *i*-PrOH in hexane, 1.0 mL/min); retention times for compound obtained using (*R,S*)-**L1**: 5.2 min (major), 5.8 min (minor).

<sup>1</sup>H NMR (500 MHz, CDCl<sub>3</sub>) δ 7.88 – 7.83 (m, 2H), 7.54 – 7.48 (m, 1H), 7.44 – 7.39 (m, 2H), 7.27 – 7.21 (m, 2H), 7.20 – 7.14 (m, 1H), 7.10 – 7.05 (m, 2H), 4.99 (t, *J* = 7.5 Hz, 1H), 2.68 – 2.56 (m, 2H), 2.42 – 2.36 (m, 2H), 1.37 – 1.29 (m, 3H), 1.10 (dd, *J* = 7.5, 3.7 Hz, 18H).

<sup>13</sup>C NMR (126 MHz, CDCl<sub>3</sub>) δ 215.1, 196.2, 141.0, 138.4, 132.2, 129.3, 128.4 (two carbons), 128.0, 126.1, 97.8, 86.5, 35.9, 30.1, 18.7, 11.6.

HRMS (ESI)  $m/z$   $[M + H]^+$  calcd for  $C_{27}H_{37}OSi$ : 405.2614, found: 405.2608.

$[\alpha]^{24}_{\text{D}} = +6.4$  ( $c = 0.5$ ,  $\text{CHCl}_3$ ); 90% ee, from (*R,S*)-**L1**.

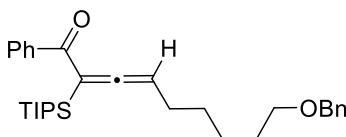

**9-(benzyloxy)-1-phenyl-2-(triisopropylsilyl)nona-2,3-dien-1-one (Scheme 3, entry 31).** The title compound was prepared according to the **GP-2** from benzaldehyde and (8-(benzyloxy)oct-1-yn-1-yl)triisopropylsilane, purified by flash column chromatography on silica gel: hexane, colorless liquid.

(*R,S*)-**L1**: 116 mg, 60% yield, 91% ee; (*S,R*)-**L1**: 117 mg, 61% yield, 90% ee.

HPLC analysis: The ee was determined on a CHIRALPAK: AD-3 column (0.5% *i*-PrOH in hexane, 1.0 mL/min); retention times for compound obtained using (*R,S*)-**L1**: 7.6 min (major), 8.9 min (minor).



$^1\text{H}$  NMR (500 MHz,  $\text{CDCl}_3$ )  $\delta$  7.86 – 7.82 (m, 2H), 7.47 (t,  $J$  = 7.4 Hz, 1H), 7.40 – 7.24 (m, 7H), 4.97 (t,  $J$  = 7.5 Hz, 1H), 4.47 (s, 2H), 3.37 (t,  $J$  = 6.6 Hz, 2H), 2.13 – 2.03 (m, 2H), 1.57 – 1.50 (m, 2H), 1.40 – 1.24 (m, 7H), 1.11 (dd,  $J$  = 7.6, 2.3 Hz, 18H).

$^{13}\text{C}$  NMR (126 MHz,  $\text{CDCl}_3$ )  $\delta$  215.5, 196.4, 138.6, 138.4, 132.1, 129.3, 128.3, 127.9, 127.6, 127.5, 97.6, 87.2, 72.9, 70.2, 29.5, 29.4, 28.0, 25.6, 18.7 (two carbons), 11.6.

HRMS (ESI)  $m/z$   $[\text{M} + \text{H}]^+$  calcd for  $\text{C}_{31}\text{H}_{45}\text{O}_2\text{Si}$ : 477.3189, found: 477.3181.

$[\alpha]^{24}_{\text{D}} = +5.6$  ( $c$  = 0.5,  $\text{CHCl}_3$ ); 91% ee, from (*R,S*)-**L1**.

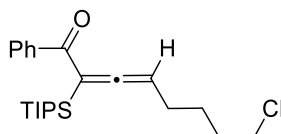

**8-chloro-1-phenyl-2-(triisopropylsilyl)octa-2,3-dien-1-one** (Scheme 3, entry 32). The title compound was prepared according to the **GP-2** from benzaldehyde and (3-bromo-7-chlorohept-1-yn-1-yl)triisopropylsilane, purified by flash column chromatography on silica gel: hexane, colorless liquid.

(*R,S*)-**L1**: 104 mg, 66% yield, 90% ee; (*S,R*)-**L1**: 102 mg, 65% yield, 90% ee.

HPLC analysis: The ee was determined on a CHIRALPAK: AD-3 column (0.5% *i*-PrOH in hexane, 1.0 mL/min); retention times for compound obtained using (*R,S*)-**L1**: 5.5 min (major), 6.5 min (minor).

$^1\text{H}$  NMR (500 MHz,  $\text{CDCl}_3$ )  $\delta$  7.86 – 7.82 (m, 2H), 7.53 – 7.48 (m, 1H), 7.44 – 7.39 (m, 2H), 4.98 (t,  $J$  = 7.5 Hz, 1H), 3.41 (t,  $J$  = 6.5 Hz, 2H), 2.15 – 2.05 (m, 2H), 1.66 – 1.59 (m, 2H), 1.53 – 1.43 (m, 2H), 1.37 (dt,  $J$  = 20.2, 7.5 Hz, 3H), 1.12 (d,  $J$  = 7.6 Hz, 18H).

$^{13}\text{C}$  NMR (126 MHz,  $\text{CDCl}_3$ )  $\delta$  215.4, 196.3, 138.4, 132.2, 129.2, 128.0, 98.0, 86.7, 44.6, 31.7, 27.3, 26.7, 18.7 (two carbons), 11.6.

HRMS (ESI)  $m/z$   $[\text{M} + \text{H}]^+$  calcd for  $\text{C}_{23}\text{H}_{36}\text{ClOSi}$ : 391.2224, found: 391.2222.

$[\alpha]^{24}_{\text{D}} = +24.8$  ( $c$  = 0.5,  $\text{CHCl}_3$ ); 90% ee, from (*R,S*)-**L1**.

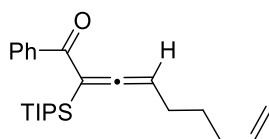

**1-phenyl-2-(triisopropylsilyl)nona-2,3,8-trien-1-one** (Scheme 3, entry 33). The title compound was prepared according to the **GP-2** from benzaldehyde and (3-bromooct-7-en-1-yn-1-yl)triisopropylsilane, purified by flash column chromatography on silica gel: hexane, colorless liquid.

(*R,S*)-**L1**: 68 mg, 46% yield, 91% ee; (*S,R*)-**L1**: 72 mg, 48% yield, 91% ee.

HPLC analysis: The ee was determined on a CHIRALPAK: AD-3 column (0.5% *i*-PrOH in hexane, 1.0 mL/min); retention times for compound obtained using (*R,S*)-**L1**: 4.2 min (major), 4.5 min (minor).

$^1\text{H}$  NMR (500 MHz,  $\text{CDCl}_3$ )  $\delta$  7.89 – 7.82 (m, 2H), 7.53 – 7.48 (m, 1H), 7.44 – 7.37 (m, 2H), 5.76 – 5.66 (m, 1H), 4.99 (t,  $J$  = 7.5 Hz, 1H), 4.96 – 4.89 (m, 2H), 2.13 – 2.04 (m, 2H), 1.94 (q,  $J$  = 7.3 Hz,

2H), 1.46 – 1.33 (m, 5H), 1.12 (d,  $J = 7.7$  Hz, 18H).

$^{13}\text{C}$  NMR (126 MHz,  $\text{CDCl}_3$ )  $\delta$  215.5, 196.4, 138.4, 138.1, 132.1, 129.3, 128.0, 114.8, 97.7, 87.0, 33.0, 28.7, 27.4, 18.7 (two carbons), 11.6.

HRMS (ESI)  $m/z$   $[\text{M} + \text{H}]^+$  calcd for  $\text{C}_{24}\text{H}_{36}\text{OSi}$ : 369.2614, found: 369.2614.

$[\alpha]^{24}_{\text{D}} = +15.2$  ( $c = 0.5$ ,  $\text{CHCl}_3$ ); 91% ee, from (*R,S*)-**L1**.

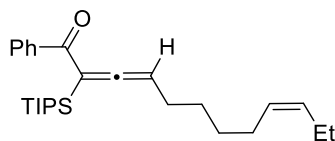

**(Z)-1-phenyl-2-(triisopropylsilyl)dodeca-2,3,9-trien-1-one (Scheme 3, entry 34).** The title compound was prepared according to the **GP-2** from benzaldehyde and (*Z*)-(3-bromoundec-8-en-1-yn-1-yl)triisopropylsilane, purified by flash column chromatography on silica gel: hexane, colorless liquid.

(*R,S*)-**L1**: 104 mg, 63% yield, 90% ee; (*S,R*)-**L1**: 106 mg, 64% yield, 90% ee.

HPLC analysis: The ee was determined on a CHIRALPAK: AD-3 column (0.5% *i*-PrOH in hexane, 1.0 mL/min); retention times for compound obtained using (*R,S*)-**L1**: 4.0 min (major), 4.3 min (minor).

$^1\text{H}$  NMR (500 MHz,  $\text{CDCl}_3$ )  $\delta$  7.85 (d,  $J = 7.3$  Hz, 2H), 7.53 – 7.46 (m, 1H), 7.43 – 7.37 (m, 2H), 5.43 – 5.19 (m, 2H), 4.99 (t,  $J = 7.5$  Hz, 1H), 2.13 – 1.92 (m, 6H), 1.41 – 1.31 (m, 5H), 1.28 – 1.23 (m, 2H), 1.12 (dd,  $J = 7.6, 2.6$  Hz, 18H), 0.94 (t,  $J = 7.6$  Hz, 3H).

$^{13}\text{C}$  NMR (126 MHz,  $\text{CDCl}_3$ )  $\delta$  215.6, 196.4, 138.4, 132.1 (two carbons), 131.8, 129.3, 128.8, 128.7, 127.9, 97.6, 87.3, 87.2, 29.1, 29.0, 27.9, 26.7, 20.5, 18.7 (two carbons), 14.3, 11.6.

HRMS (ESI)  $m/z$   $[\text{M} + \text{H}]^+$  calcd for  $\text{C}_{27}\text{H}_{43}\text{OSi}$ : 411.3083, found: 411.3070.

$[\alpha]^{24}_{\text{D}} = +11.2$  ( $c = 0.5$ ,  $\text{CHCl}_3$ ); 90% ee, from (*R,S*)-**L1**.

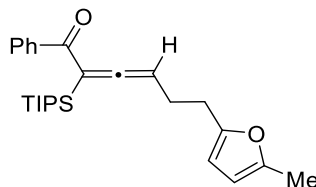

**6-(5-methylfuran-2-yl)-1-phenyl-2-(triisopropylsilyl)hexa-2,3-dien-1-one (Scheme 3, entry 35).** The title compound was prepared according to the **GP-2** from benzaldehyde and (3-bromo-5-(5-methylfuran-2-yl)pent-1-yn-1-yl)triisopropylsilane, purified by flash column chromatography on silica gel: hexane, colorless liquid.

(*R,S*)-**L1**: 106 mg, 64% yield, 88% ee; (*S,R*)-**L1**: 109 mg, 66% yield, 88% ee.

HPLC analysis: The ee was determined on a CHIRALPAK: AD-3 column (0.5% *i*-PrOH in hexane, 1.0 mL/min); retention times for compound obtained using (*R,S*)-**L1**: 4.7 min (major), 5.0 min (minor).

$^1\text{H}$  NMR (500 MHz,  $\text{CDCl}_3$ )  $\delta$  7.89 – 7.84 (m, 2H), 7.54 – 7.49 (m, 1H), 7.45 – 7.39 (m, 2H), 5.79 (d,  $J = 1.9$  Hz, 1H), 5.76 (d,  $J = 2.9$  Hz, 1H), 5.03 (t,  $J = 7.4$  Hz, 1H), 2.63 – 2.56 (m, 2H), 2.40 (ddd,  $J$

= 15.0, 7.4, 2.8 Hz, 2H), 2.23 (s, 3H), 1.39 – 1.32 (m, 3H), 1.12 (dd,  $J = 7.6, 3.0$  Hz, 18H).

$^{13}\text{C}$  NMR (126 MHz,  $\text{CDCl}_3$ )  $\delta$  215.0, 196.1, 152.7, 150.5, 138.3, 132.2, 129.3, 128.0, 106.0, 105.8, 97.9, 86.3, 28.1, 27.0, 18.7 (two carbons), 13.5, 11.6.

HRMS (ESI)  $m/z$   $[\text{M} + \text{H}]^+$  calcd for  $\text{C}_{26}\text{H}_{37}\text{O}_2\text{Si}$ : 409.2563, found: 409.2563.

$[\alpha]^{24}_{\text{D}} = +10.4$  ( $c = 0.5$ ,  $\text{CHCl}_3$ ); 88% ee, from (*R,S*)-**L1**.

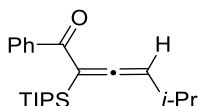

**5-methyl-1-phenyl-2-(triisopropylsilyl)hexa-2,3-dien-1-one (Scheme 3, entry 36).** The title compound was prepared according to the **GP-2** from benzaldehyde and (3-bromo-4-methylpent-1-yn-1-yl)triisopropylsilane, purified by flash column chromatography on silica gel: hexane, colorless liquid.

(*R,S*)-**L1**: 57 mg, 41% yield, 92% ee; (*S,R*)-**L1**: 78 mg, 57% yield, 92% ee.

HPLC analysis: The ee was determined on a CHIRALPAK: AD-3 column (0.5% *i*-PrOH in hexane, 1.0 mL/min); retention times for compound obtained using (*R,S*)-**L1**: 4.1 min (major), 4.3 min (minor).

$^1\text{H}$  NMR (500 MHz,  $\text{CDCl}_3$ )  $\delta$  7.86 – 7.82 (m, 2H), 7.52 – 7.47 (m, 1H), 7.42 – 7.38 (m, 2H), 4.95 (d,  $J = 7.8$  Hz, 1H), 2.46 – 2.38 (m, 1H), 1.40 – 1.34 (m, 3H), 1.12 (dd,  $J = 7.5, 4.2$  Hz, 18H), 1.01 (d,  $J = 6.8$  Hz, 3H), 0.93 (d,  $J = 6.7$  Hz, 3H).

$^{13}\text{C}$  NMR (126 MHz,  $\text{CDCl}_3$ )  $\delta$  214.6, 196.6, 138.5, 132.0, 129.3, 127.9, 99.1, 94.7, 28.6, 22.9 (two carbons), 18.8 (two carbons), 11.7.

HRMS (ESI)  $m/z$   $[\text{M} + \text{H}]^+$  calcd for  $\text{C}_{22}\text{H}_{35}\text{OSi}$ : 343.2457, found: 343.2444.

$[\alpha]^{24}_{\text{D}} = +5.2$  ( $c = 0.5$ ,  $\text{CHCl}_3$ ); 92% ee, from (*R,S*)-**L1**.

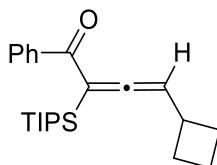

**4-cyclobutyl-1-phenyl-2-(triisopropylsilyl)buta-2,3-dien-1-one (Scheme 3, entry 37).** The title compound was prepared according to the **GP-2** from benzaldehyde and (3-bromo-3-cyclobutylprop-1-yn-1-yl)triisopropylsilane, purified by flash column chromatography on silica gel: hexane, colorless liquid.

(*R,S*)-**L1**: 74 mg, 52% yield, 90% ee; (*S,R*)-**L1**: 83 mg, 58% yield, 90% ee.

HPLC analysis: The ee was determined on a CHIRALPAK: AD-3 column (0.5% *i*-PrOH in hexane, 1.0 mL/min); retention times for compound obtained using (*R,S*)-**L1**: 4.3 min (major), 4.7 min (minor).

$^1\text{H}$  NMR (500 MHz,  $\text{CDCl}_3$ )  $\delta$  7.87 – 7.83 (m, 2H), 7.52 – 7.47 (m, 1H), 7.43 – 7.38 (m, 2H), 5.13 (d,  $J = 7.9$  Hz, 1H), 3.04 – 2.96 (m, 1H), 2.19 – 2.08 (m, 2H), 1.90 – 1.74 (m, 4H), 1.36 (dt,  $J = 15.0, 7.5$  Hz, 3H), 1.12 (dd,  $J = 7.6, 2.9$  Hz, 18H).

$^{13}\text{C}$  NMR (126 MHz,  $\text{CDCl}_3$ )  $\delta$  214.8, 196.3, 138.3, 132.0, 129.3, 127.9, 98.6, 92.5, 34.2, 29.5 29.3, 18.7 (three carbons), 11.7.

HRMS (ESI)  $m/z$   $[\text{M} + \text{H}]^+$  calcd for  $\text{C}_{23}\text{H}_{35}\text{OSi}$ : 355.2457, found: 355.2461.

$[\alpha]^{24}_{\text{D}} = +0.8$  ( $c = 0.5$ ,  $\text{CHCl}_3$ ); 90% ee, from (*R,S*)-**L1**.

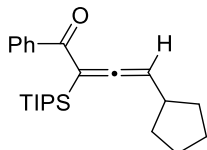

**4-cyclopentyl-1-phenyl-2-(triisopropylsilyl)buta-2,3-dien-1-one (Scheme 3, entry 38).** The title compound was prepared according to the **GP-2** from benzaldehyde and (3-bromo-3-cyclopentylprop-1-yn-1-yl)triisopropylsilane, purified by flash column chromatography on silica gel: hexane, colorless liquid.

(*R,S*)-**L1**: 101 mg, 68% yield, 96% ee; (*S,R*)-**L1**: 102 mg, 69% yield, 96% ee.

HPLC analysis: The ee was determined on a CHIRALPAK: AD-3 column (0.5% *i*-PrOH in hexane, 1.0 mL/min); retention times for compound obtained using (*R,S*)-**L1**: 4.2 min (major), 4.6 min (minor).

$^1\text{H}$  NMR (500 MHz,  $\text{CDCl}_3$ )  $\delta$  7.88 – 7.82 (m, 2H), 7.52 – 7.46 (m, 1H), 7.43 – 7.37 (m, 2H), 5.00 (d,  $J = 8.1$  Hz, 1H), 2.60 – 2.52 (m, 1H), 1.88 – 1.79 (m, 1H), 1.77 – 1.69 (m, 1H), 1.58 – 1.49 (m, 4H), 1.41 – 1.33 (m, 3H), 1.28 – 1.25 (m, 1H), 1.21 – 1.17 (m, 1H), 1.12 (dd,  $J = 7.5, 5.5$  Hz, 18H).

$^{13}\text{C}$  NMR (126 MHz,  $\text{CDCl}_3$ )  $\delta$  215.4, 196.5, 138.4, 132.0, 129.3, 127.9, 98.5, 92.5, 39.2, 33.3, 33.1, 24.9, 18.8, 18.7, 11.7.

HRMS (ESI)  $m/z$   $[\text{M} + \text{H}]^+$  calcd for  $\text{C}_{24}\text{H}_{37}\text{OSi}$ : 369.2614, found: 369.2619.

$[\alpha]^{24}_{\text{D}} = -5.6$  ( $c = 0.5$ ,  $\text{CHCl}_3$ ); 96% ee, from (*R,S*)-**L1**.

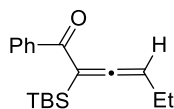

**2-(tert-butyl)dimethylsilyl-1-phenylhexa-2,3-dien-1-one (Scheme 3, entry 39).** The title compound was prepared according to the **GP-2** from benzaldehyde and (3-bromopent-1-yn-1-yl)(*tert*-butyl)dimethylsilane, purified by flash column chromatography on silica gel: hexane, colorless liquid.

(*R,S*)-**L1**: 79 mg, 52% yield, 74% ee; (*S,R*)-**L1**: 72 mg, 48% yield, 74% ee.

HPLC analysis: The ee was determined on a CHIRALPAK: AD-3 column (0.5% *i*-PrOH in hexane, 1.0 mL/min); retention times for compound obtained using (*R,S*)-**L1**: 4.3 min (major), 4.6 min (minor).

$^1\text{H}$  NMR (500 MHz,  $\text{CDCl}_3$ )  $\delta$  7.89 – 7.82 (m, 2H), 7.53 – 7.48 (m, 1H), 7.44 – 7.38 (m, 2H), 5.07 (t,  $J = 7.0$  Hz, 1H), 2.13 – 2.05 (m, 2H), 1.00 (t,  $J = 7.5$  Hz, 3H), 0.97 (s, 9H), 0.21 (d,  $J = 5.2$  Hz, 6H).

$^{13}\text{C}$  NMR (126 MHz,  $\text{CDCl}_3$ )  $\delta$  214.5, 196.0, 138.3, 132.2, 129.3, 128.0, 100.2, 88.9, 26.9, 21.2, 18.0, 13.9, -5.1, -5.3.

HRMS (ESI)  $m/z$   $[\text{M} + \text{H}]^+$  calcd for  $\text{C}_{18}\text{H}_{27}\text{OSi}$ : 287.1831, found: 287.1831.

$[\alpha]^{24}_{\text{D}} = +1.6$  ( $c = 0.5$ ,  $\text{CHCl}_3$ ); 74% ee, from (*R,S*)-**L1**.

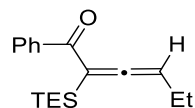

**1-phenyl-2-(triethylsilyl)hexa-2,3-dien-1-one (Scheme 3, entry 40).** The title compound was prepared according to the **GP-2** from benzaldehyde and (3-bromopent-1-yn-1-yl)triethylsilane, purified by flash column chromatography on silica gel: hexane, colorless liquid.

(*R,S*)-**L1**: 68 mg, 59% yield, 70% ee; (*S,R*)-**L1**: 65 mg, 55% yield, 70% ee.

HPLC analysis: The ee was determined on a CHIRALPAK: AD-3 column (0.5% *i*-PrOH in hexane, 1.0 mL/min); retention times for compound obtained using (*R,S*)-**L1**: 4.6 min (major), 5.0 min (minor).

$^1\text{H}$  NMR (500 MHz,  $\text{CDCl}_3$ )  $\delta$  7.88 – 7.82 (m, 2H), 7.53 – 7.48 (m, 1H), 7.43 – 7.38 (m, 2H), 5.08 (t,  $J = 6.9$  Hz, 1H), 2.13 – 2.05 (m, 2H), 1.03 – 0.96 (m, 12H), 0.80 – 0.74 (m, 6H).

$^{13}\text{C}$  NMR (126 MHz,  $\text{CDCl}_3$ )  $\delta$  214.7, 196.3, 138.3, 132.1, 129.2, 127.9, 99.3, 88.6, 21.2, 13.9, 7.4, 3.5.

HRMS (ESI)  $m/z$   $[\text{M} + \text{H}]^+$  calcd for  $\text{C}_{18}\text{H}_{26}\text{OSi}$ : 287.1831, found: 287.1826.

$[\alpha]^{24}_{\text{D}} = +15.6$  ( $c = 0.5$ ,  $\text{CHCl}_3$ ); 70% ee, from (*R,S*)-**L1**.

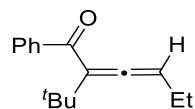

**2-(tert-butyl)-1-phenylhexa-2,3-dien-1-one (Scheme 3, entry 41).** The title compound was prepared according to the **GP-2** from benzaldehyde and 5-bromo-2,2-dimethylhept-3-yne, purified by flash column chromatography on silica gel: hexane, colorless liquid.

(*R,S*)-**L1**: 20 mg, 21% yield, 95% ee; (*S,R*)-**L1**: 17 mg, 18% yield, 95% ee.

HPLC analysis: The ee was determined on a CHIRALPAK: AD-3 column (0.5% *i*-PrOH in hexane, 1.0 mL/min); retention times for compound obtained using (*R,S*)-**L1**: 4.6 min (major), 4.8 min (minor).

$^1\text{H}$  NMR (500 MHz,  $\text{CDCl}_3$ )  $\delta$  7.75 (d,  $J = 7.3$  Hz, 2H), 7.49 – 7.45 (m, 1H), 7.38 (t,  $J = 7.6$  Hz, 2H), 5.35 (t,  $J = 6.7$  Hz, 1H), 2.04 (qd,  $J = 7.5, 1.5$  Hz, 2H), 1.27 (s, 9H), 0.95 (t,  $J = 7.4$  Hz, 3H).

$^{13}\text{C}$  NMR (126 MHz,  $\text{CDCl}_3$ )  $\delta$  209.4, 196.0, 139.8, 131.8, 129.0, 127.8, 115.9, 97.3, 30.9, 29.7, 21.9, 13.3.

HRMS (ESI)  $m/z$   $[\text{M} + \text{H}]^+$  calcd for  $\text{C}_{16}\text{H}_{20}\text{O}$ : 229.1592, found: 229.1590.

$[\alpha]^{24}_{\text{D}} = +10.20$  ( $c = 0.5$ ,  $\text{CHCl}_3$ ); 95% ee, from (*R,S*)-**L1**.

## IV. Effect of Reaction Parameters

### General procedure 3 (GP-3): Catalytic Allenylation Reactions.

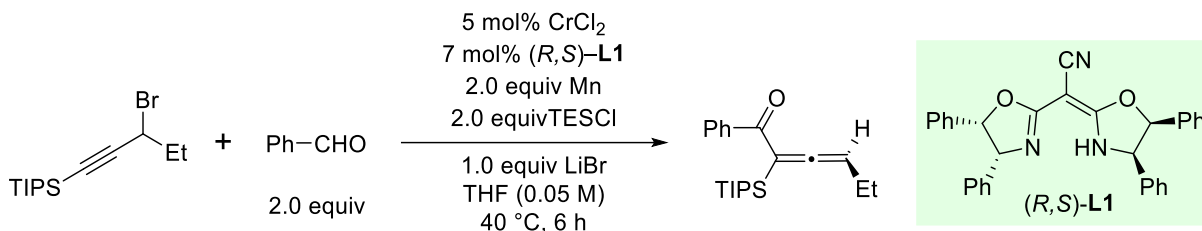

**Preparation of the catalyst solution:** In a nitrogen-filled glovebox, an oven-dried 4 mL vial with a magnetic stir bar, were charged the CrCl<sub>2</sub> (0.6 mg, 0.005 mmol, 5 mol%) and (R,S)-L1 (3.4 mg, 0.007 mmol, 7 mol%). Then 2.0 mL THF was added and the vial was closed with a PTFE septum cap. The mixture was stirred at room temperature for 1 h.

**Catalytic asymmetric allenylation:** In a nitrogen-filled glovebox, to the prepared catalyst solution were added the propargyl bromide (30 mg, 0.1 mmol, 1.0 equiv), the LiBr (8.7 mg, 0.1 mmol, 1.0 equiv), the aldehyde (20  $\mu$ L, 0.2 mmol, 2.0 equiv), the dissociation reagent TESCI (34  $\mu$ L, 0.2 mmol, 2.0 equiv), and Mn powder (11 mg, 0.2 mmol, 2.0 equiv) sequentially. Then the vial was closed with a PTFE septum cap, and taken out of the glovebox. The reaction mixture was stirred at 40 °C for 6 h.

**Work-up:** The reaction mixture was run through a short silica gel pad with hexanes/EtOAc (10:1) as the eluent. Then the solvent was removed the under reduced pressure. The yield was determined via <sup>1</sup>H NMR analysis of the crude reaction mixture. The ee was determined via HPLC analysis after further purification by prep-TLC.

**Table S1. Effect of Reaction Parameters.**

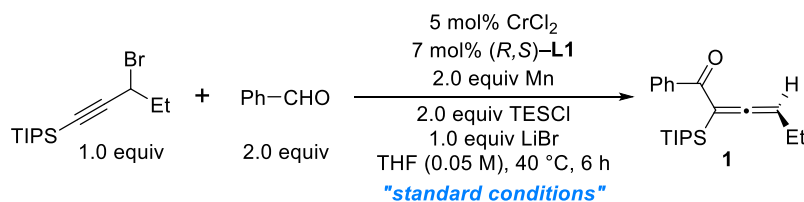

| entry           | variation from the "standard conditions"                            | Yield <sup>a</sup> (%) | ee <sup>b</sup> (%) |
|-----------------|---------------------------------------------------------------------|------------------------|---------------------|
| 1               | None                                                                | 83                     | 91                  |
| 2               | No CrCl <sub>2</sub> , No <b>L1</b>                                 | <1                     | —                   |
| 3               | No CrCl <sub>2</sub>                                                | <1                     | —                   |
| 4               | No <b>L1</b>                                                        | 13                     | 0                   |
| 5               | <b>L2</b> , instead of <b>L1</b>                                    | 40                     | 88                  |
| 6               | <b>L3</b> , instead of <b>L1</b>                                    | 14                     | <2                  |
| 7               | <b>L4</b> , instead of <b>L1</b>                                    | 13                     | 18                  |
| 8               | <b>L5</b> , instead of <b>L1</b>                                    | 11                     | 20                  |
| 9               | <b>L6</b> , instead of <b>L1</b>                                    | 10                     | 11                  |
| 10              | <b>L7</b> , instead of <b>L1</b>                                    | 14                     | 21                  |
| 11              | <b>L8</b> , instead of <b>L1</b>                                    | <1                     | —                   |
| 12              | Zn, instead of Mn                                                   | <1                     | —                   |
| 13              | No TESCI                                                            | <1                     | —                   |
| 14              | TMSCI, instead of TESCI                                             | 73                     | 81                  |
| 15              | 0.1 M, instead of 0.05 M, in THF                                    | 85                     | 86                  |
| 16              | CrCl <sub>3</sub> (THF) <sub>3</sub> , instead of CrCl <sub>2</sub> | 74                     | 88                  |
| 17              | No LiBr                                                             | 36                     | 82                  |
| 18              | 0.5 equiv LiBr                                                      | 66                     | 90                  |
| 19              | 2 mol% CrCl <sub>2</sub> , 3 mol% <b>L1</b>                         | 42                     | 89                  |
| 20              | 1.5 equiv aldehyde                                                  | 59                     | 89                  |
| 21              | 1.5 equiv Mn                                                        | 73                     | 89                  |
| 22              | 1.5 equiv TESCI                                                     | 58                     | 88                  |
| 23              | DME, instead of THF                                                 | 56                     | 88                  |
| 24              | rt, instead of 40 °C                                                | 42                     | 87                  |
| 25              | 1.0 equiv H <sub>2</sub> O was added                                | 21                     | 87                  |
| 26              | 1 mL air, added via syringe                                         | <1                     | —                   |
| 27 <sup>c</sup> | 1.0 equiv aldehyde                                                  | 40                     | 76                  |

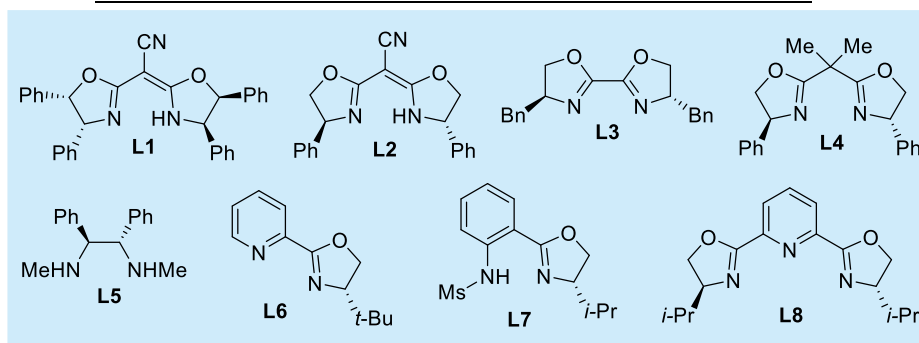

<sup>a</sup> All datas are the average of two experiments. <sup>b</sup> Yield and dr were determined via <sup>1</sup>H NMR analysis. <sup>c</sup> ee was determined via HPLC analysis. <sup>c</sup> The corresponding allenol was obtained with 21% yield, 5:1 dr and 92% ee.

## V. Preliminary Mechanistic Study

### Deuterium labelling experiment

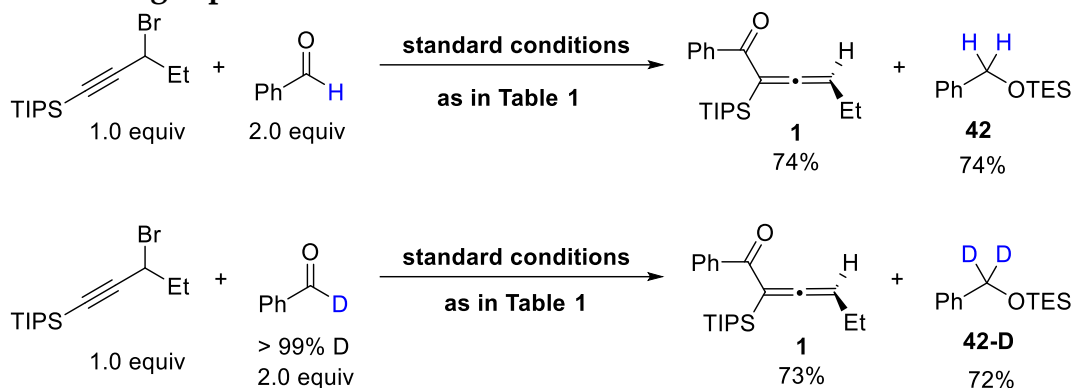

This reaction was conducted according to the **GP-3**.

Data for product **42**:

$^1\text{H}$  NMR (500 MHz,  $\text{CDCl}_3$ )  $\delta$  7.35 – 7.22 (m, 5H), 4.74 (s, 2H), 0.98 (t,  $J$  = 8.0 Hz, 9H), 0.66 (q,  $J$  = 8.0 Hz, 6H).

$^{13}\text{C}$  NMR (126 MHz,  $\text{CDCl}_3$ )  $\delta$  141.3, 128.2, 126.9, 126.2, 64.7, 6.8, 4.5.

Data for product **42-D**:

$^1\text{H}$  NMR (500 MHz,  $\text{CDCl}_3$ )  $\delta$  7.36 – 7.21 (m, 5H), 0.98 (t,  $J$  = 7.9 Hz, 9H), 0.65 (q,  $J$  = 7.9 Hz, 6H).

$^{13}\text{C}$  NMR (126 MHz,  $\text{CDCl}_3$ )  $\delta$  141.2, 128.2, 127.0, 126.3, 64.2, 6.8, 4.5.

### General procedure 4 (GP-4): Catalytic Allenylation Reactions.

**Preparation of the catalyst solution:** In a nitrogen-filled glovebox, and oven-dried 20 mL vial with a magnetic stir bar, were charged the  $\text{CrCl}_2$  (2.5 mg, 0.02 mmol, 5 mol%) and (*R,S*)-**L1** (13.5 mg, 0.028 mmol, 7 mol%). Then 8.0 mL THF was added and the vial was closed with a PTFE septum cap, and then stirred at room temperature for 2 h.

**Catalytic asymmetric allenylation:** In a nitrogen-filled glovebox, to the prepared catalyst solution were added the propargyl bromide (121 mg, 0.4 mmol, 1.0 equiv), the LiBr (35 mg, 0.4 mmol, 1.0 equiv), benzaldehyde (85 mg, 0.8 mmol, 2.0 equiv), TESCl (135  $\mu\text{L}$ , 0.8 mmol, 2.0 equiv), Mn powder (44 mg, 0.8 mmol, 2.0 equiv) and radical scavenger (0.8 mmol, 2.0 equiv) sequentially. Then the vial was closed with a PTFE septum cap, and taken out of the glovebox. The reaction mixture was stirred at 40  $^\circ\text{C}$  for 8 h.

**Work-up:** The reaction mixture was run through a short silica gel pad with hexanes/EtOAc (5:1) as the eluent. Then the solvent was removed the under reduced pressure, and the residue was purified by flash chromatography to provide the desired product.



## Radical trapping experiments

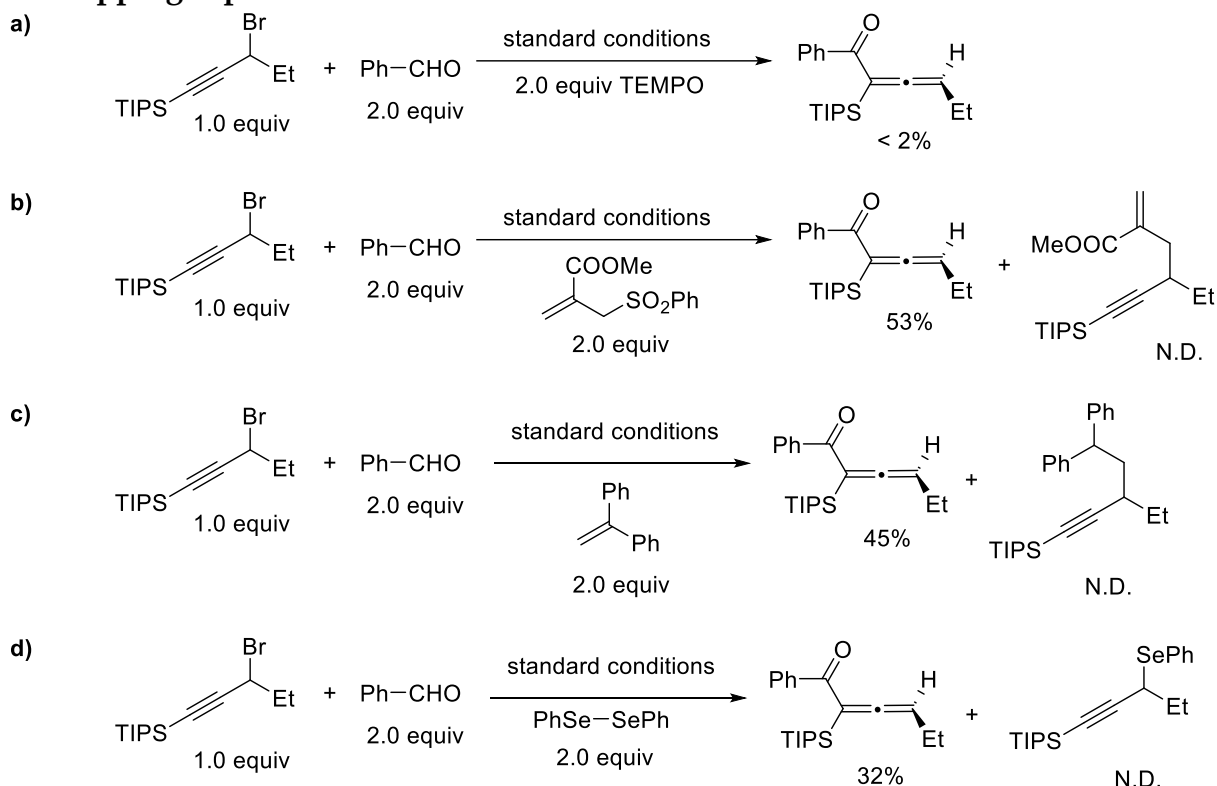

According to the **GP-4**, the reaction was proceeded with **a**) TEMPO (125 mg, 0.8 mmol, 2.0 equiv), **b**) methyl 2-((phenylsulfonyl)methyl)acrylate (192 mg, 0.8 mmol, 2.0 equiv), **c**) ethene-1,1-diyl(dibenzene) (144 mg, 0.8 mmol, 2.0 equiv), **d**) 1,2-diphenyldiselenane (249 mg, 0.8 mmol, 2.0 equiv) as radical scavenger respectively.

## Secondary isotope effect

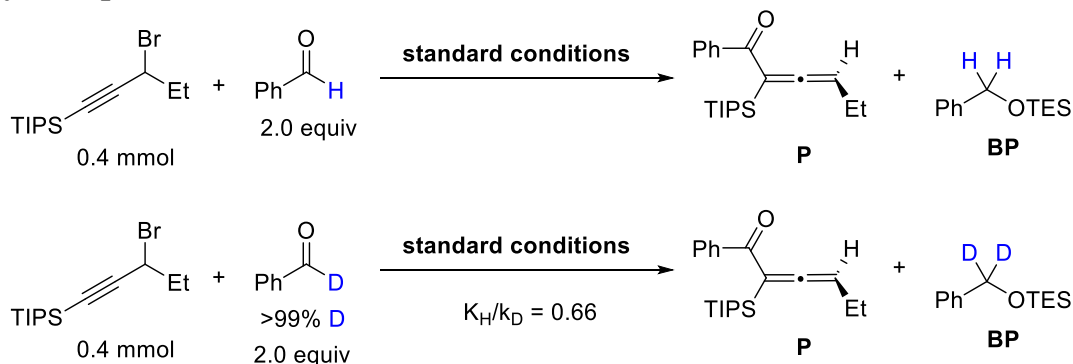

This reaction was conducted according to the **GP-2** with 1,3,5-trimethoxybenzene as an internal standard. In a nitrogen-filled glovebox, 200  $\mu$ L of reaction mixture was taken every 5 minutes and the reaction mixture was run through a short silica gel pad with hexanes/EtOAc (3:1) as the eluent immediately. Then the solvent was removed the under reduced pressure. The yield was determined by  $^1\text{H}$  NMR analysis of the crude product. Each experiment was repeated 2 times. The reactions were repeated with benzaldehyde- $\alpha$ - $\text{d}_1$  under otherwise identical conditions.

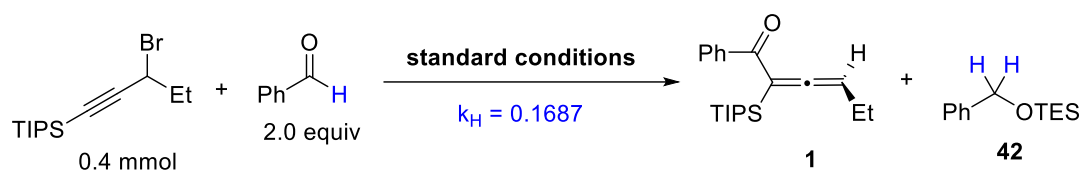

| Time   | 1 (% , First run) | 1 (% , Second run) |
|--------|-------------------|--------------------|
| 5 min  | 0.27              | 0.23               |
| 10 min | 0.92              | 1.12               |
| 15 min | 1.75              | 1.80               |
| 20 min | 2.67              | 2.82               |
| 25 min | 3.60              | 3.61               |

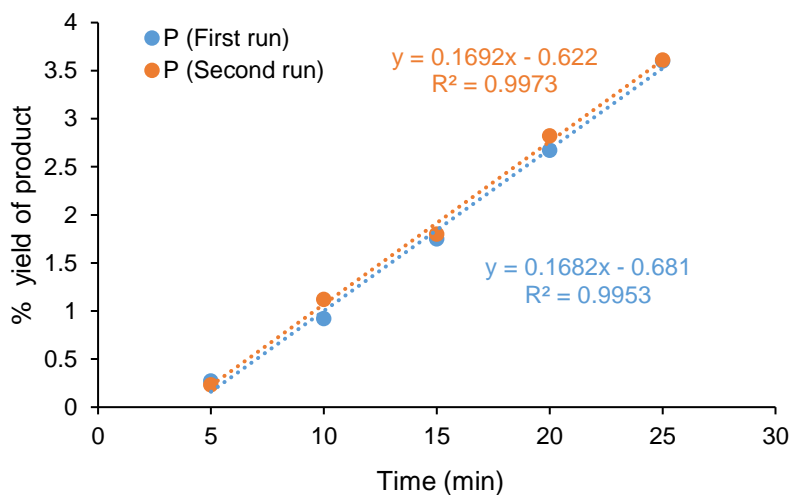

**Scheme S1.** Representative initial data of **42**

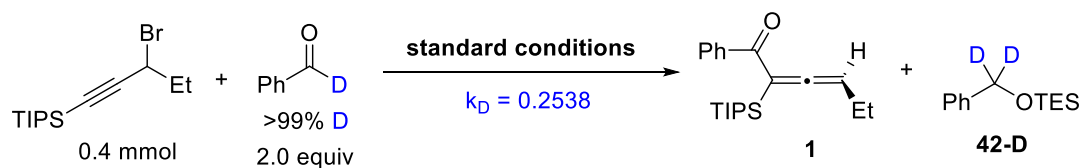

| Time   | 1 (% , First run) | 1 (% , Second run) |
|--------|-------------------|--------------------|
| 5 min  | 0.32              | 0.52               |
| 10 min | 1.45              | 1.68               |
| 15 min | 2.44              | 3.18               |
| 20 min | 3.80              | 3.93               |
| 25 min | 5.36              | 5.87               |

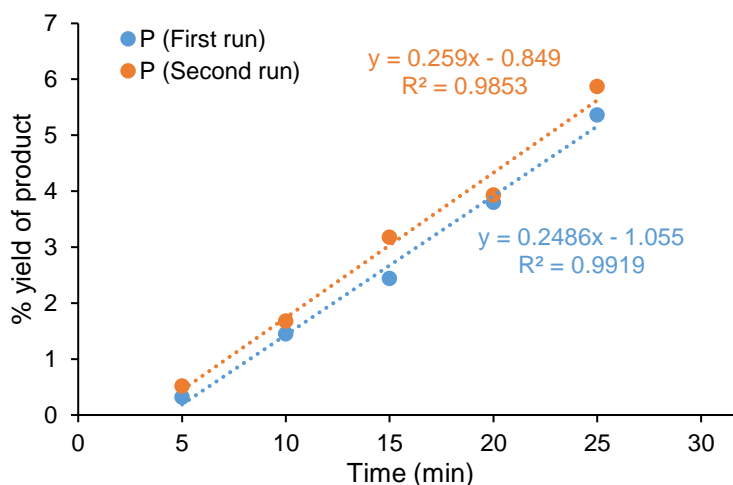

**Scheme S2.** Representative initial data of **42-D**

$$\text{KIE} = k_{\text{H}} / k_{\text{D}} = 0.1687 / 0.2538 = 0.66$$

### Non-linear effect study

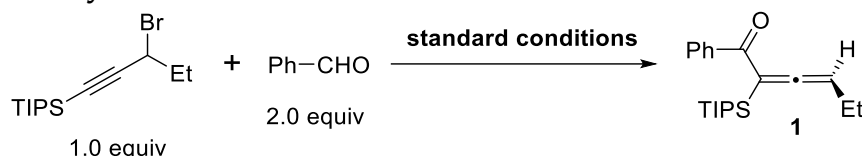

According to the **GP-3**, the reaction was proceeded in 9 times with chiral ligands (*S,R*)-**L1** and (*R,S*)-**L1** mixed in different proportions. The ee value of product **1** was determined by HPLC analysis: a CHIRALPAK: AD-3 column (0.5% *i*-PrOH in hexane, 1.0 mL/min); retention times for compound obtained using (*R,S*)-**L1**: 4.2 min (major), 4.5 min (minor). And the ee value of catalyst was determined by SFC analysis: a CHIRALCEL IG-3 column (20% MeOH in CO<sub>2</sub>, 2.0 mL/min); retention times for catalyst: 3.6 min and 5.5 min.

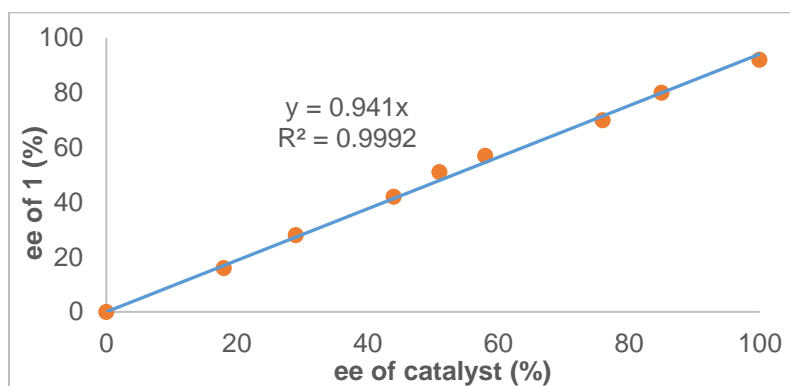

**Scheme S3.** Non-linear effect study of **1**

## VI. Assignment of the Absolute Configuration

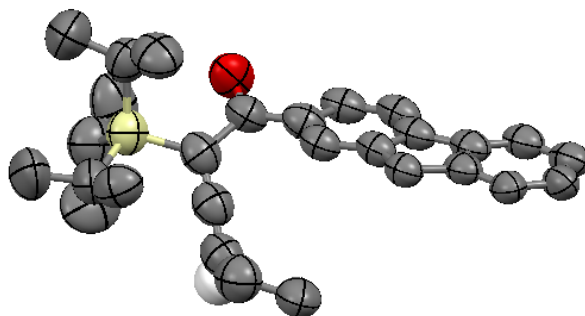

**Scheme S4.** Thermal ellipsoid plot at the 50% probability level. Hydrogen atoms are omitted for clarity.

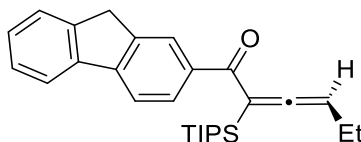

**(R)-1-(9H-fluoren-2-yl)-2-(triisopropylsilyl)hexa-2,3-dien-1-one (Scheme 2, entry 16).** X-ray quality crystals were obtained by slow evaporation of a saturated solution in MeCN of a sample synthesized with (*R,S*)-**L1**. A single crystal of  $C_{28}H_{36}OSi$  was selected and mounted in a nylon loop in parabar oil. All measurements were performed on a Bruker Photon III diffractometer with filtered Cu-K $\alpha$  radiation at a temperature of 100 K. Using Olex2 (4), the structure was solved with the ShelXS structure solution program (5) using Direct Methods and refined with the ShelXL refinement package (6) using Least Squares minimization. The absolute stereochemistry was determined on the basis of the absolute structure parameter. Crystal data, data collection parameters, and structure refinement details are given in **Table S2** and **Table S3**.

**Table S2. Sample and crystal data.**

|                      |                        |                     |
|----------------------|------------------------|---------------------|
| Identification code  | CU-ORTH-FULL4-NO14_a_a |                     |
| Chemical formula     | $C_{28}H_{36}OSi$      |                     |
| Formula weight       | 416.66 g/mol           |                     |
| Temperature          | 100(2) K               |                     |
| Wavelength           | 1.54178 Å              |                     |
| Crystal system       | orthorhombic           |                     |
| Space group          | P 21 21 21             |                     |
| Unit cell dimensions | $a = 7.2879(5)$ Å      | $\alpha = 90^\circ$ |
|                      | $b = 8.1290(6)$ Å      | $\beta = 90^\circ$  |
|                      | $c = 41.692(3)$ Å      | $\gamma = 90^\circ$ |

|                        |                                       |
|------------------------|---------------------------------------|
| Volume                 | 2470.0(3) Å <sup>3</sup>              |
| Z                      | 4                                     |
| Density (calculated)   | 1.120 g/cm <sup>3</sup>               |
| Absorption coefficient | 0.942 mm <sup>-1</sup>                |
| F(000)                 | 904                                   |
| Crystal size           | 0.100 x 0.100 x 0.080 mm <sup>3</sup> |

**Table S3. Data collection and structure refinement.**

|                                   |                                             |
|-----------------------------------|---------------------------------------------|
| Theta range for data collection   | 4.241 to 74.907°                            |
| Index ranges                      | -8<=h<=9, -10<=k<=9, -52<=l<=52             |
| Reflections collected             | 60775                                       |
| Independent reflections           | 5059 [R(int) = 0.0732]                      |
| Completeness to theta = 67.679°   | 99.8%                                       |
| Absorption correction             | Semi-empirical from equivalents             |
| Max. and min. transmission        | 0.927 and 0.910                             |
| Refinement method                 | Full-matrix least-squares on F <sup>2</sup> |
| Data / restraints / parameters    | 5059 / 849 / 498                            |
| Goodness-of-fit on F <sup>2</sup> | 0.977                                       |
| Final R indices [I>2sigma(I)]     | R1 = 0.0666, wR2 = 0.1704                   |
| R indices (all data)              | R1 = 0.0891, wR2 = 0.1909                   |
| Absolute structure parameter      | 0.01(2)                                     |
| Extinction coefficient            | n/a                                         |
| Largest diff. peak and hole       | 0.257 and -0.280 e.Å <sup>-3</sup>          |

## VII. References

- (1) Nolin, K. A.; Ahn, R. W.; Kobayashi, Y.; Kennedy-Smith, J. J.; Toste, F. D., Enantioselective Reduction of Ketones and Imines Catalyzed by (CN-Box)Re<sup>V</sup>-Oxo Complexes. *Chem. Eur. J.* **2010**, *16*, 9555.
- (2) Zhang, F.-H.; Guo, X.; Zeng, X.; Wang, Z., Catalytic Enantioconvergent Allenylation of Aldehydes with Propargyl Halides. *Angew. Chem., Int. Ed.* **2022**, e202117114.
- (3) Wang, P.-F.; Yu, J.; Guo, K.-X.; Jiang, S.-P.; Chen, J.-J.; Gu, Q.-S.; Liu, J.-R.; Hong, X.; Li, Z.-L.; Liu, X.-Y., Design of Hemilabile N,N,N-Ligands in Copper-Catalyzed Enantioconvergent Radical Cross-Coupling of Benzyl/Propargyl Halides with Alkenylboronate Esters. *J. Am. Chem. Soc.* **2022**, *144*, 6442.
- (4) Dolomanov, O. V.; Bourhis, L. J.; Gildea, R. J.; Howard, J. A. K.; Puschmann, H., OLEX2: a Complete Structure Solution, Refinement, and Analysis Program. *J. Appl. Cryst.* **2009**, *42*, 339.
- (5) Sheldrick, G., SHELXT - Integrated Space-Group and Crystal-Structure Determination. *Acta Cryst. A* **2015**, *71*, 3.
- (6) Sheldrick, G., Crystal Structure Refinement with SHELXL. *Acta Cryst. C* **2015**, *71*, 3.

<sup>1</sup>H NMR (600 MHz, CDCl<sub>3</sub>)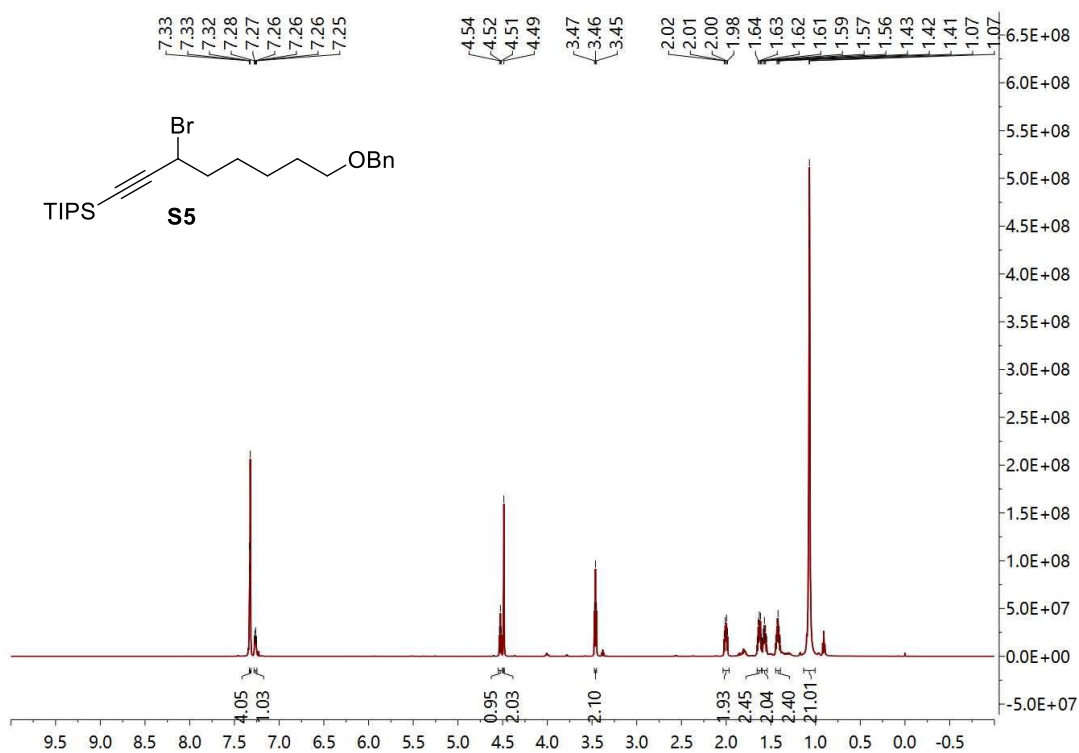 $^{13}\text{C}$  NMR (151 MHz,  $\text{CDCl}_3$ )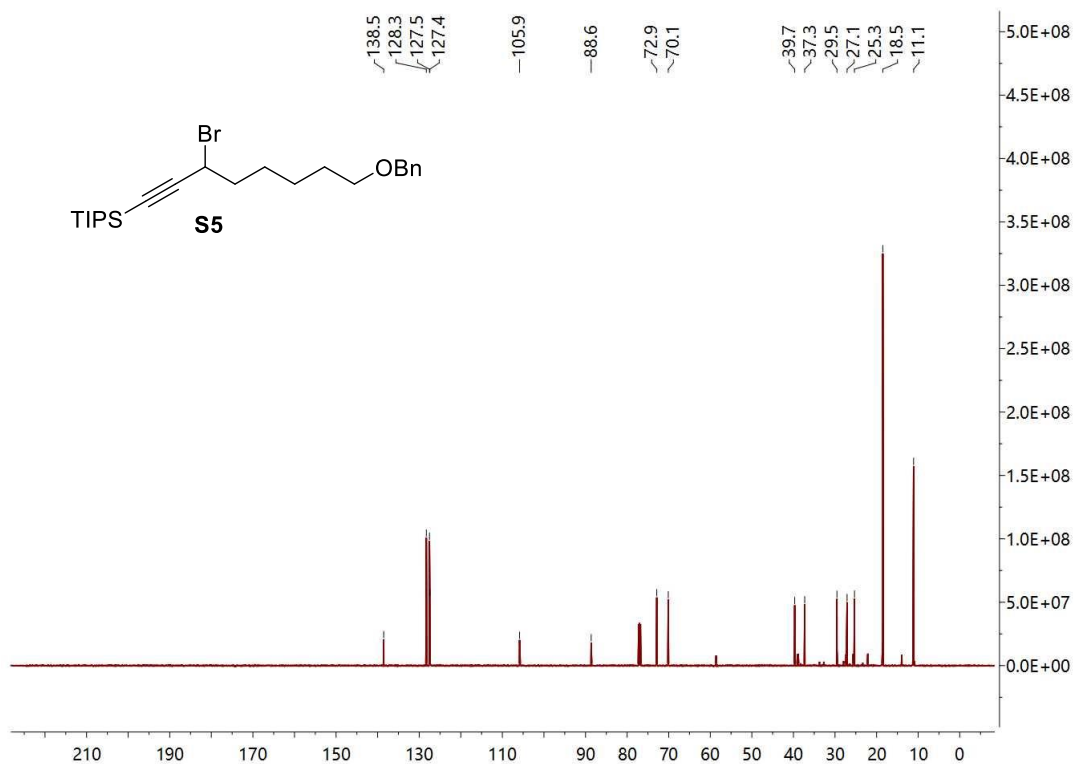

<sup>1</sup>H NMR (500 MHz, CDCl<sub>3</sub>)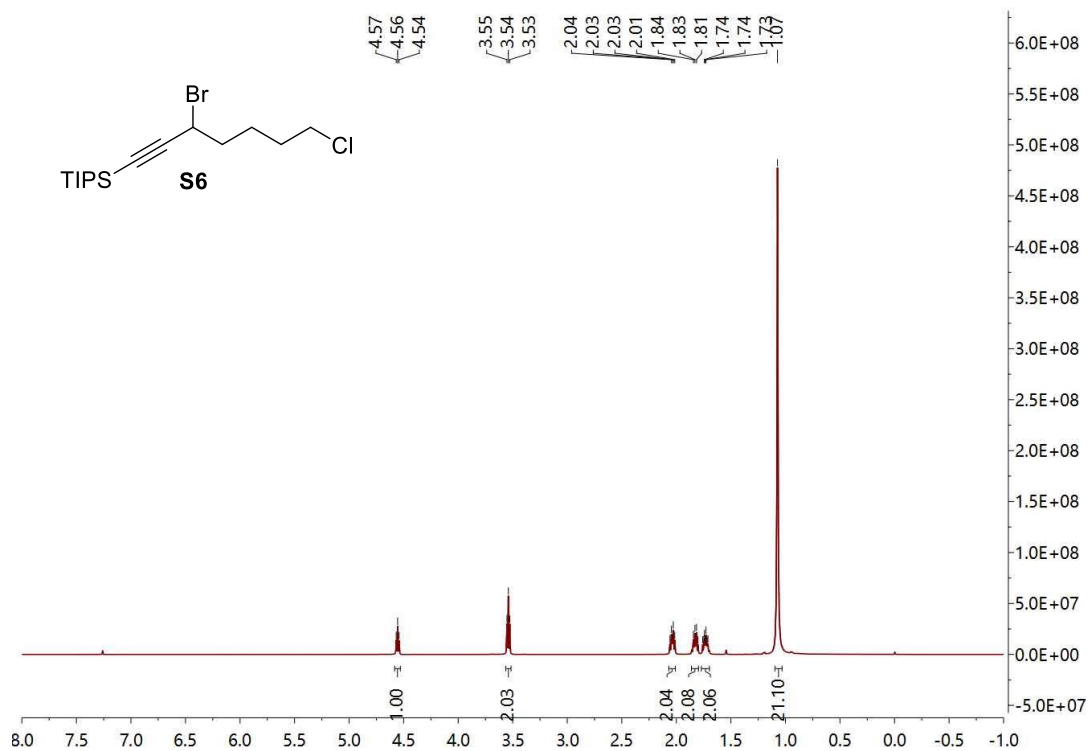

**<sup>13</sup>C NMR (126 MHz, CDCl<sub>3</sub>)**

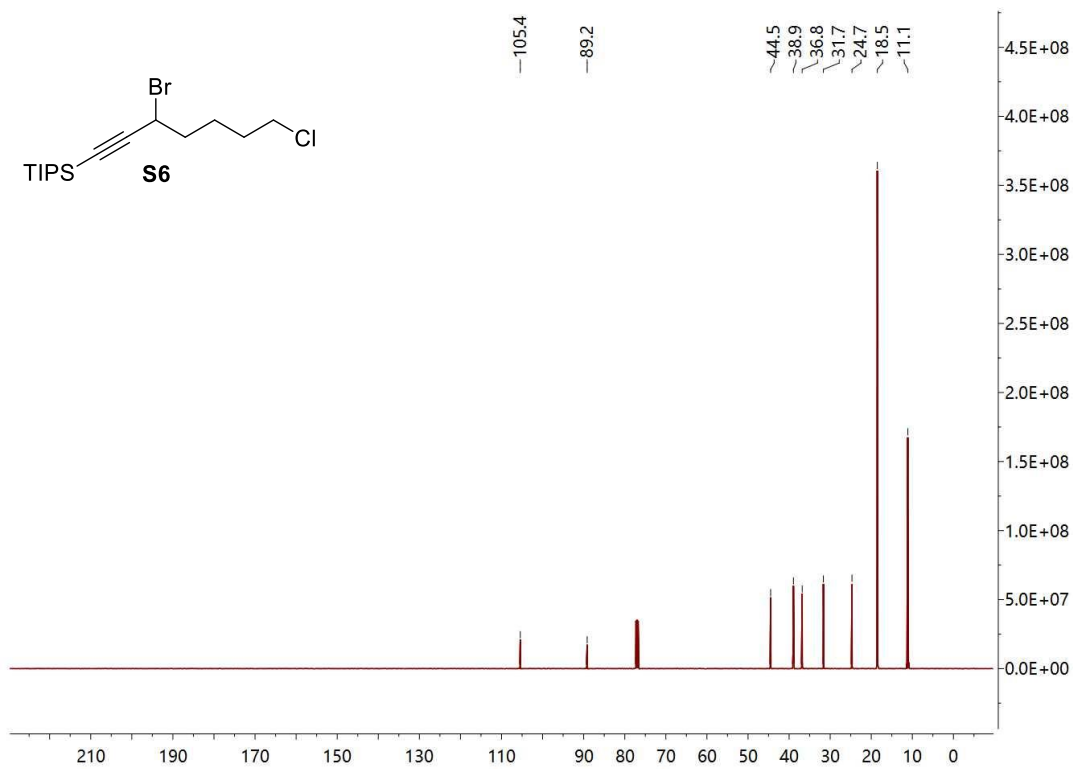



<sup>1</sup>H NMR (500 MHz, CDCl<sub>3</sub>)

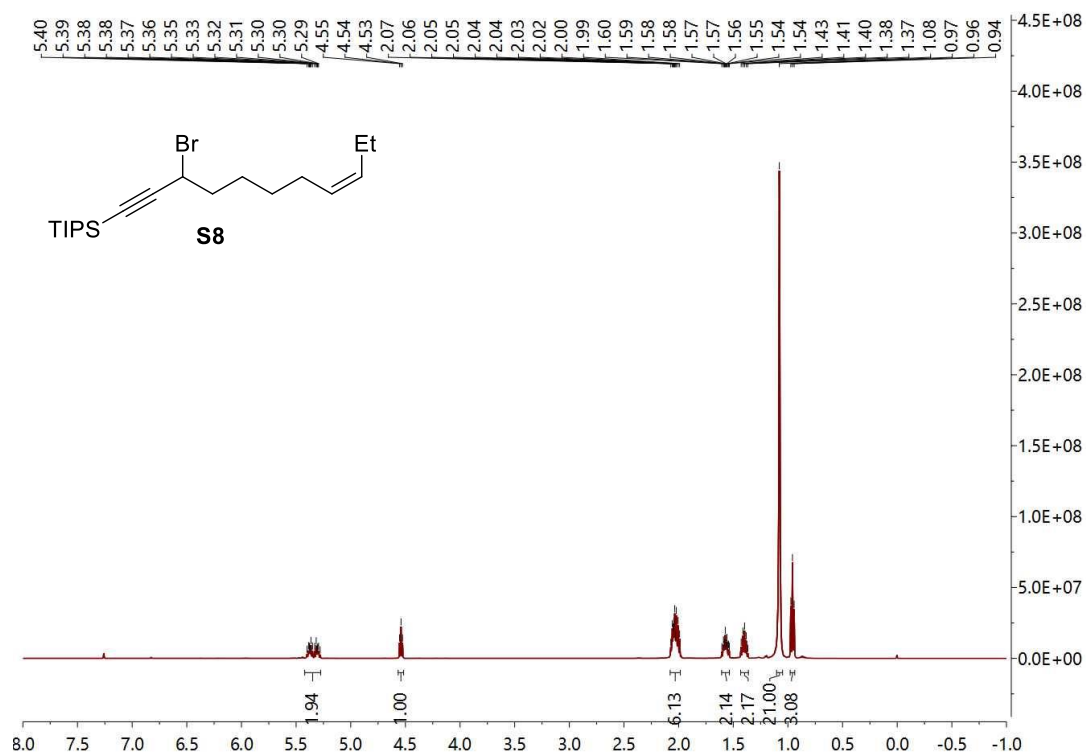

<sup>13</sup>C NMR (126 MHz, CDCl<sub>3</sub>)

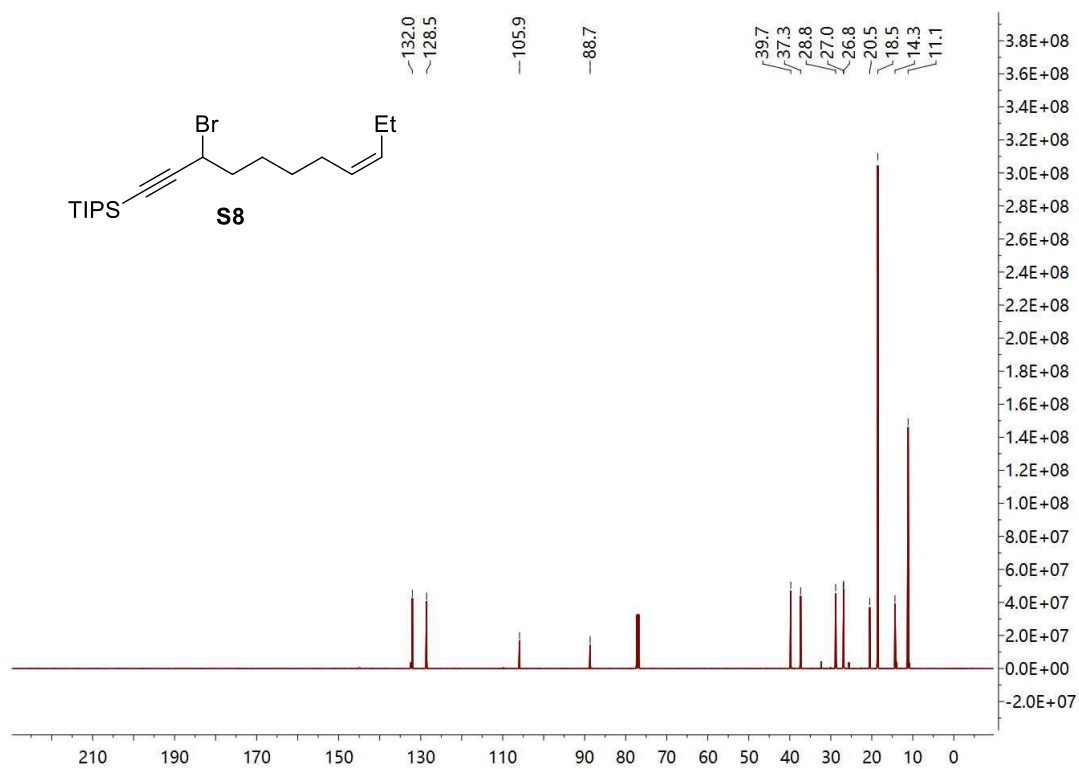

<sup>1</sup>H NMR (500 MHz, CDCl<sub>3</sub>)

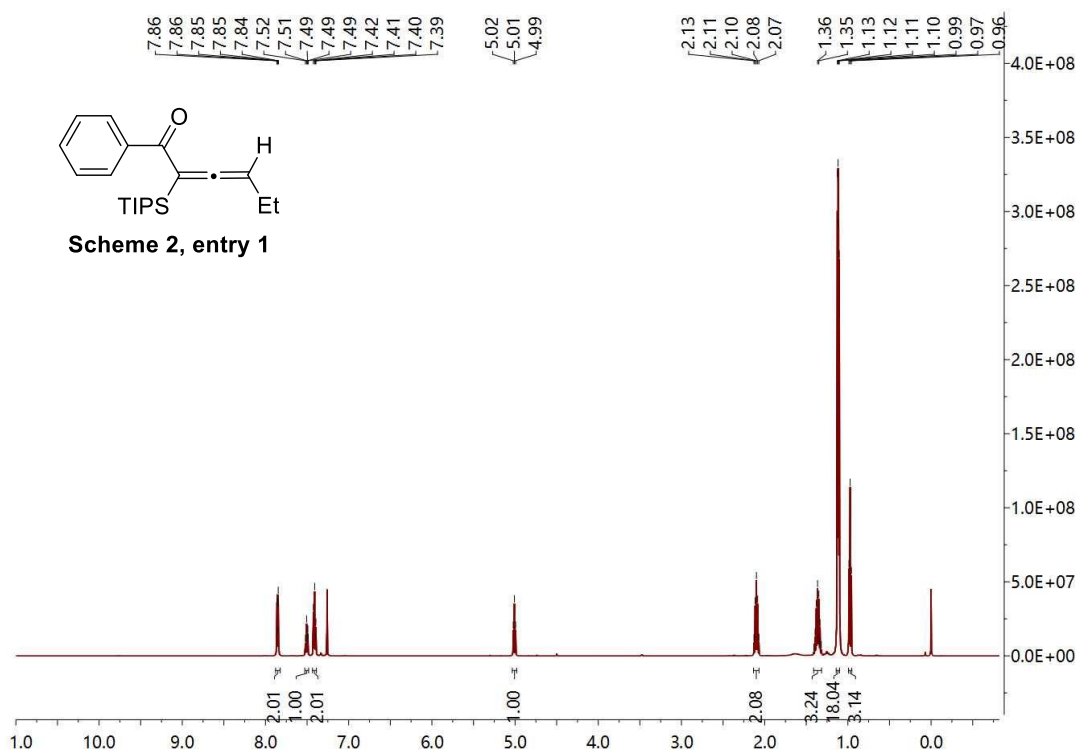

<sup>13</sup>C NMR (126 MHz, CDCl<sub>3</sub>)

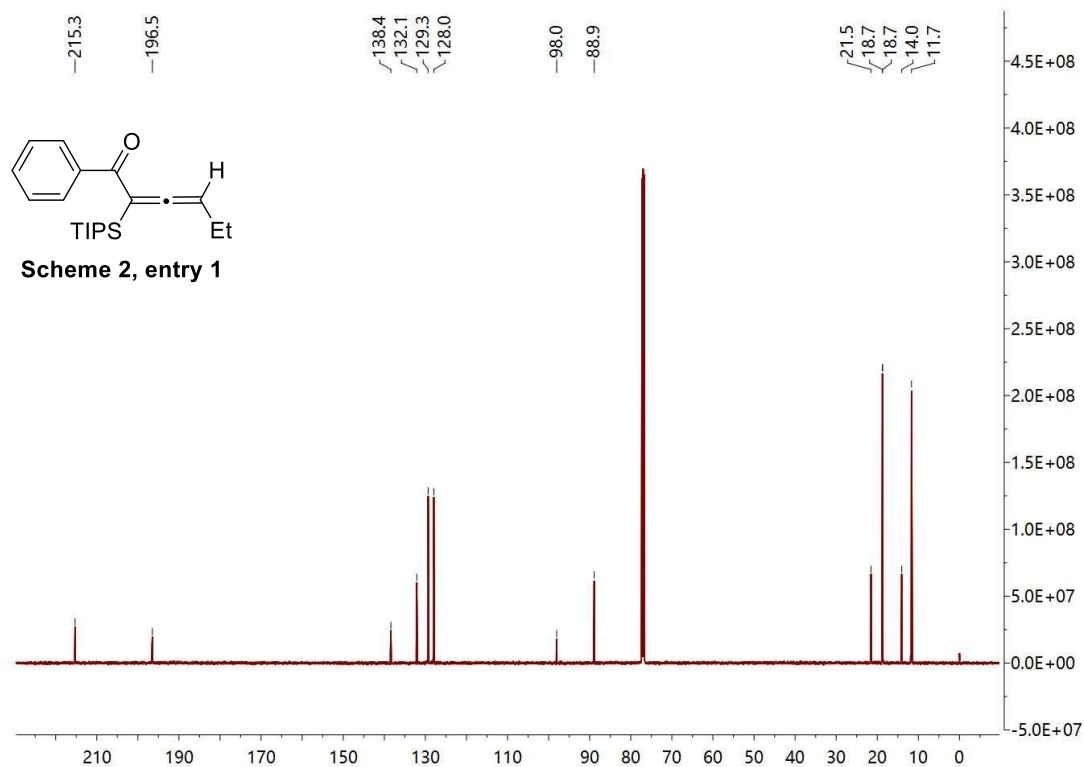

$^1\text{H}$  NMR (500 MHz,  $\text{CDCl}_3$ )

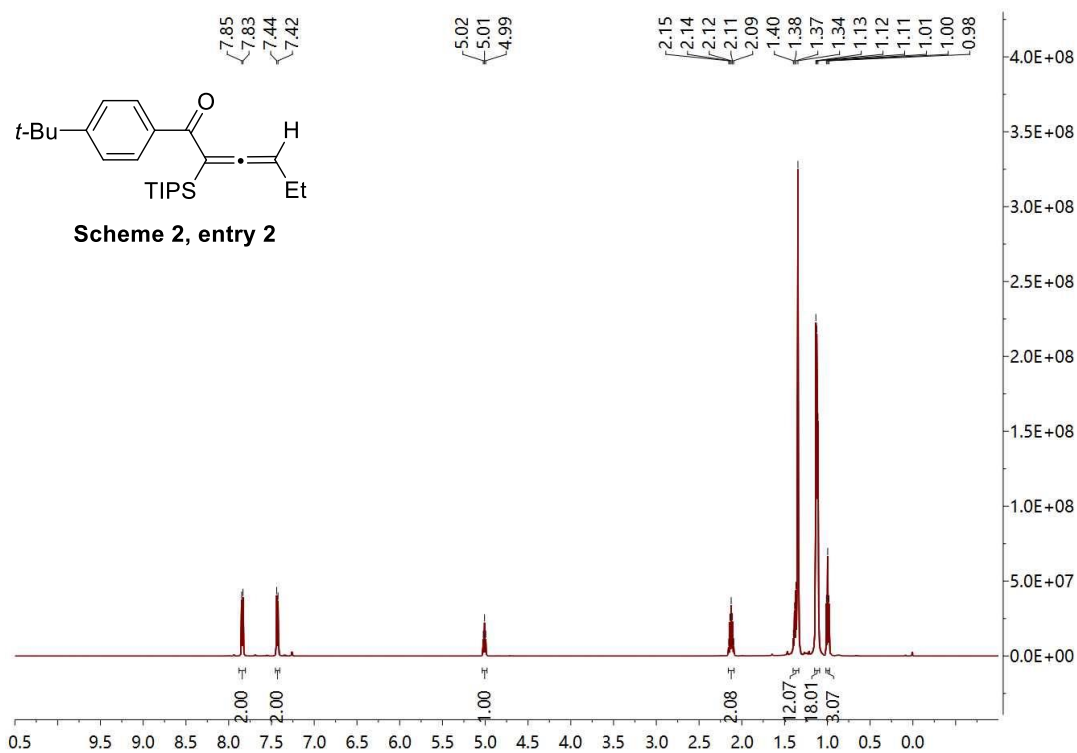

$^{13}\text{C}$  NMR (126 MHz,  $\text{CDCl}_3$ )

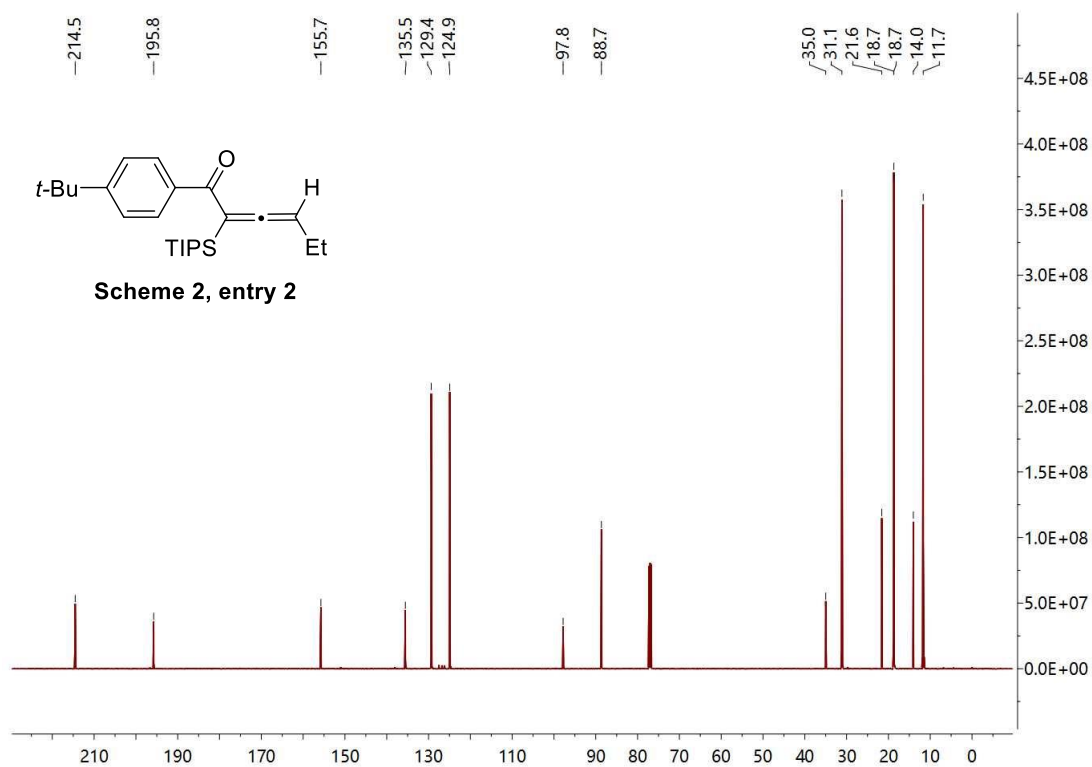

**$^1\text{H}$  NMR (500 MHz,  $\text{CDCl}_3$ )**

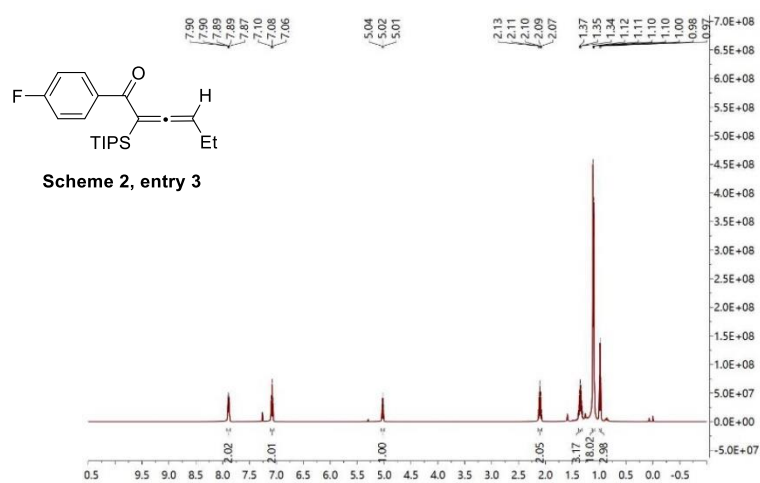

**$^{13}\text{C}$  NMR (126 MHz,  $\text{CDCl}_3$ )**

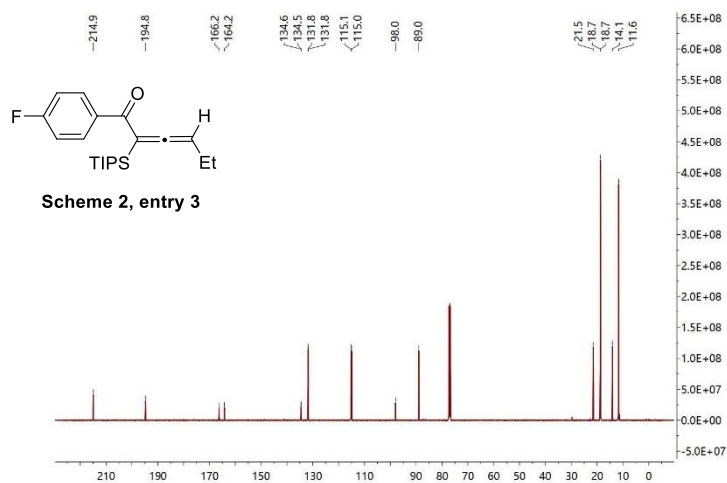

**$^{19}\text{F}$  NMR (471 MHz,  $\text{CDCl}_3$ )**

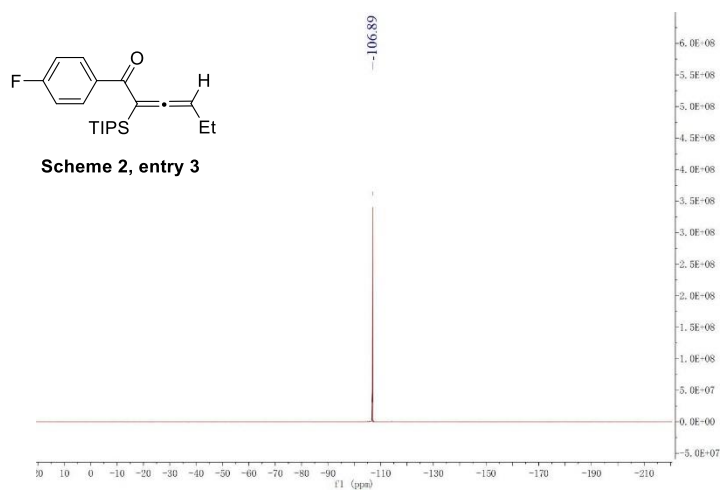

$^1\text{H}$  NMR (500 MHz,  $\text{CDCl}_3$ )

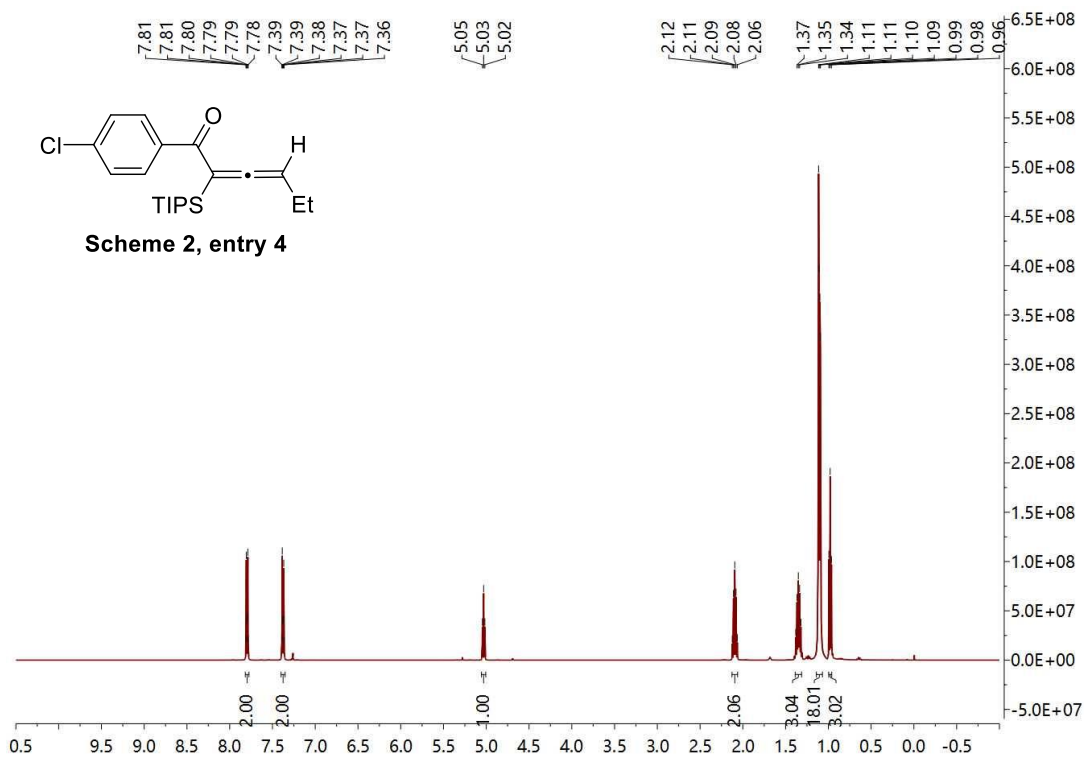

$^{13}\text{C}$  NMR (126 MHz,  $\text{CDCl}_3$ )

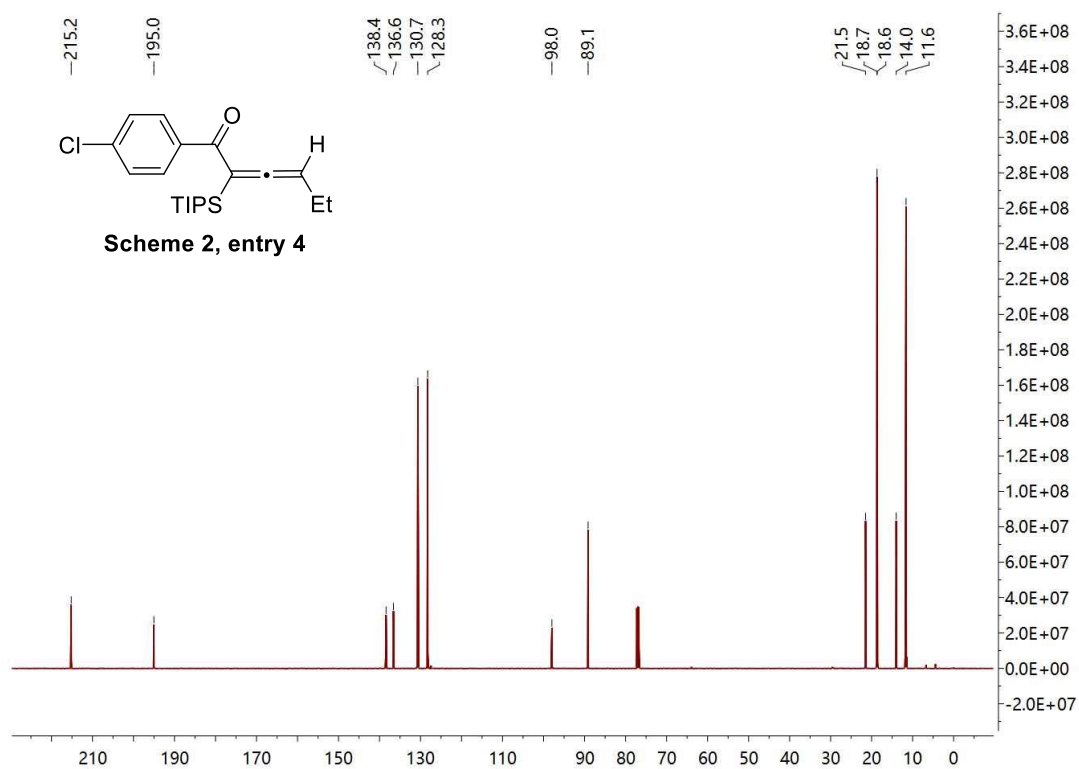

**$^1\text{H}$  NMR (500 MHz,  $\text{CDCl}_3$ )**

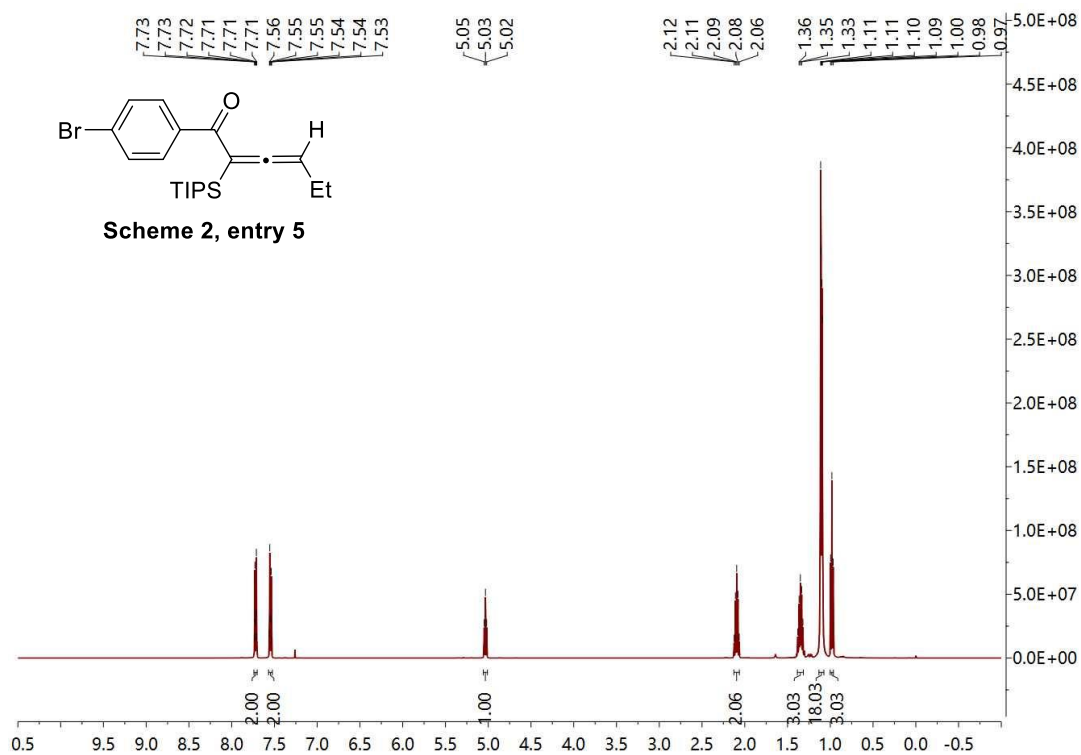

**$^{13}\text{C}$  NMR (126 MHz,  $\text{CDCl}_3$ )**

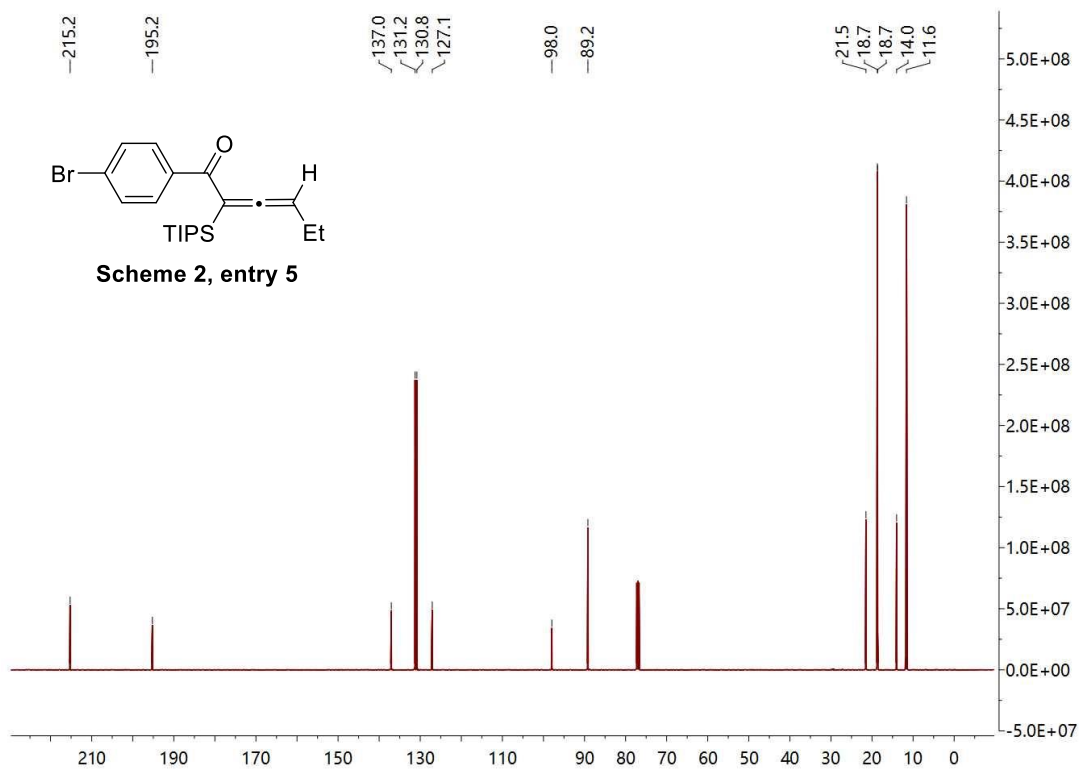

$^1\text{H}$  NMR (500 MHz,  $\text{CDCl}_3$ )

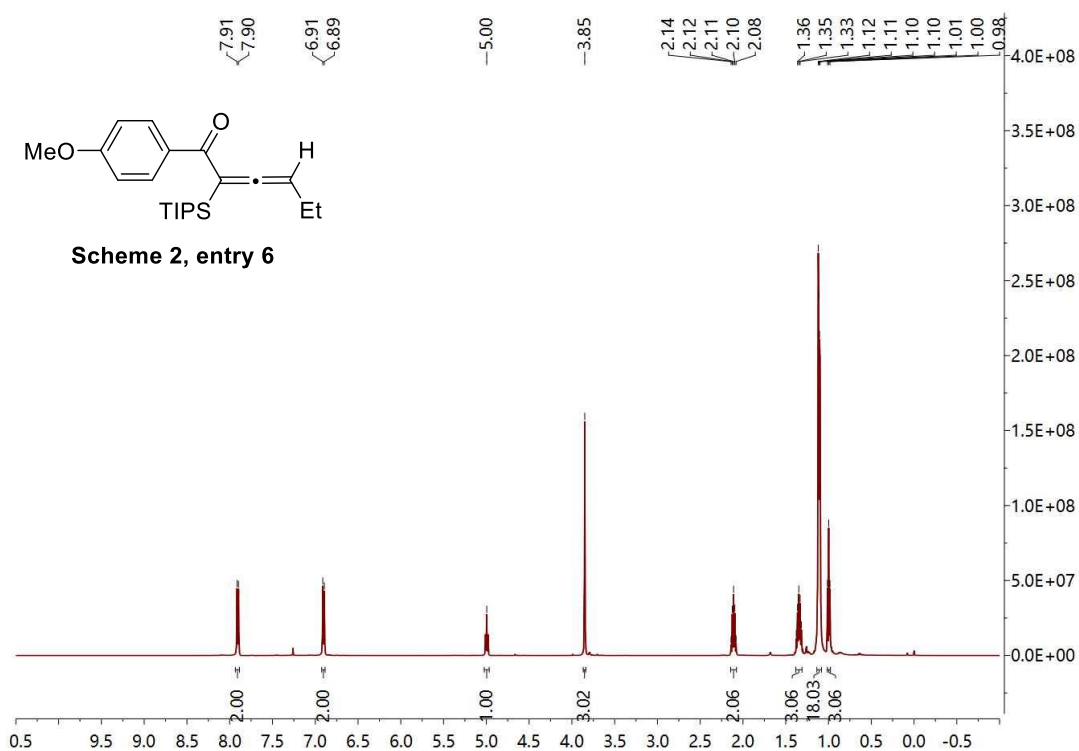

$^{13}\text{C}$  NMR (126 MHz,  $\text{CDCl}_3$ )

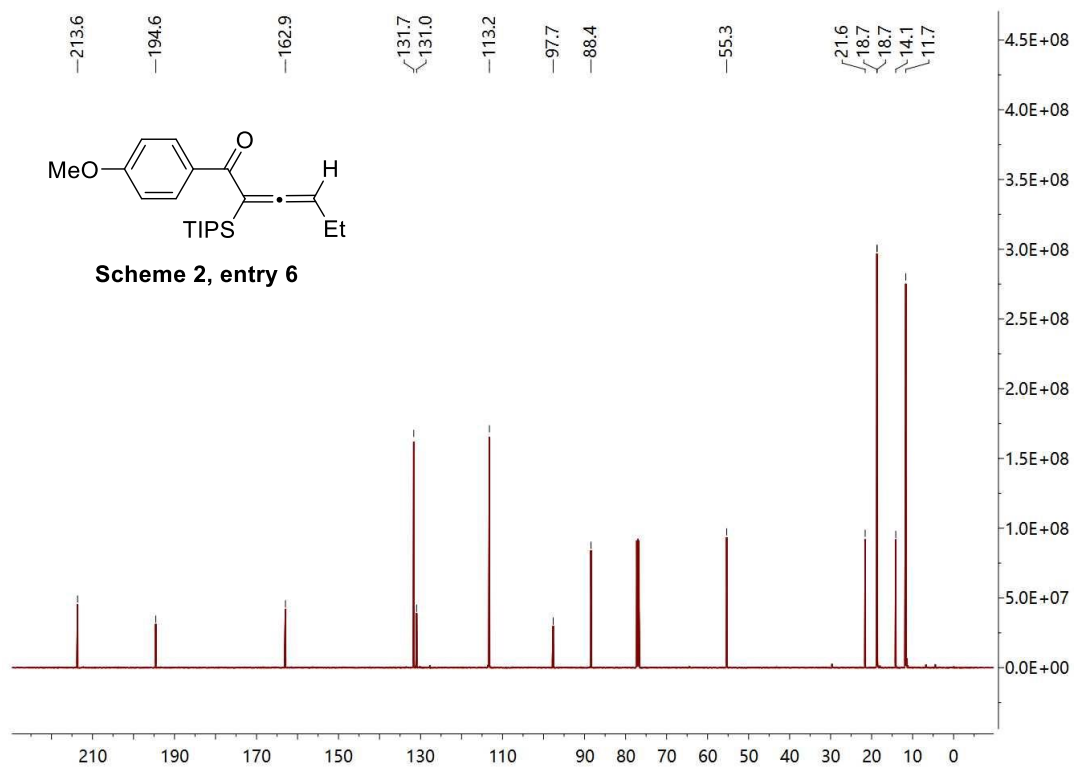

<sup>1</sup>H NMR (500 MHz, CDCl<sub>3</sub>)

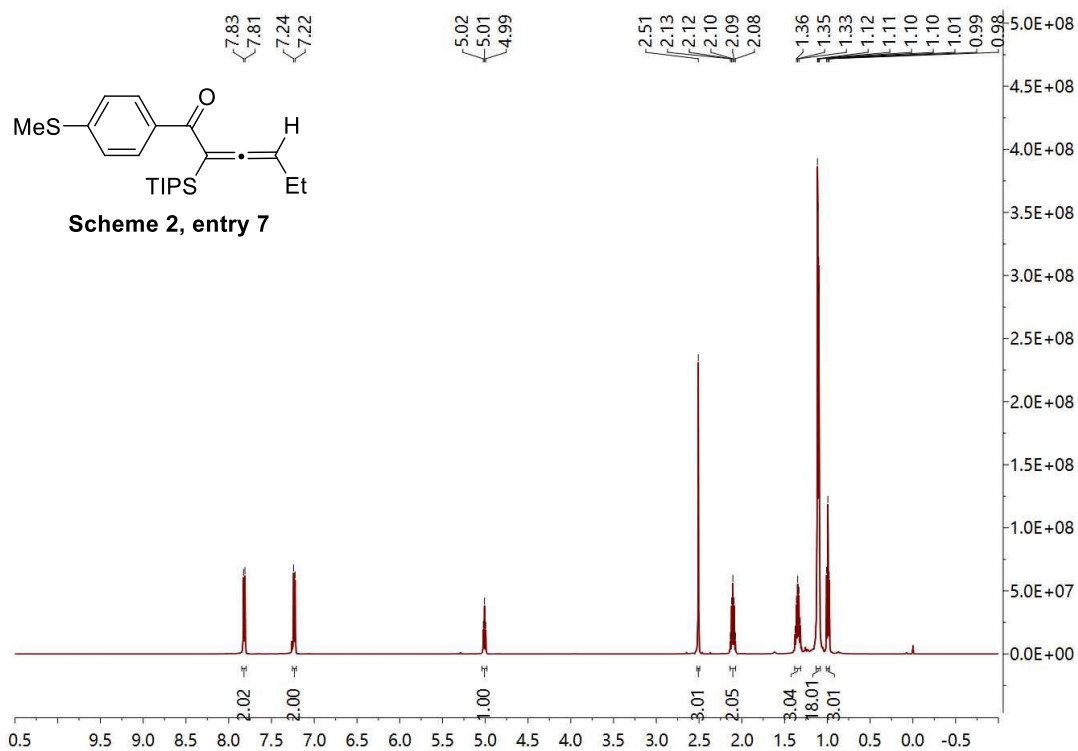

<sup>13</sup>C NMR (126 MHz, CDCl<sub>3</sub>)

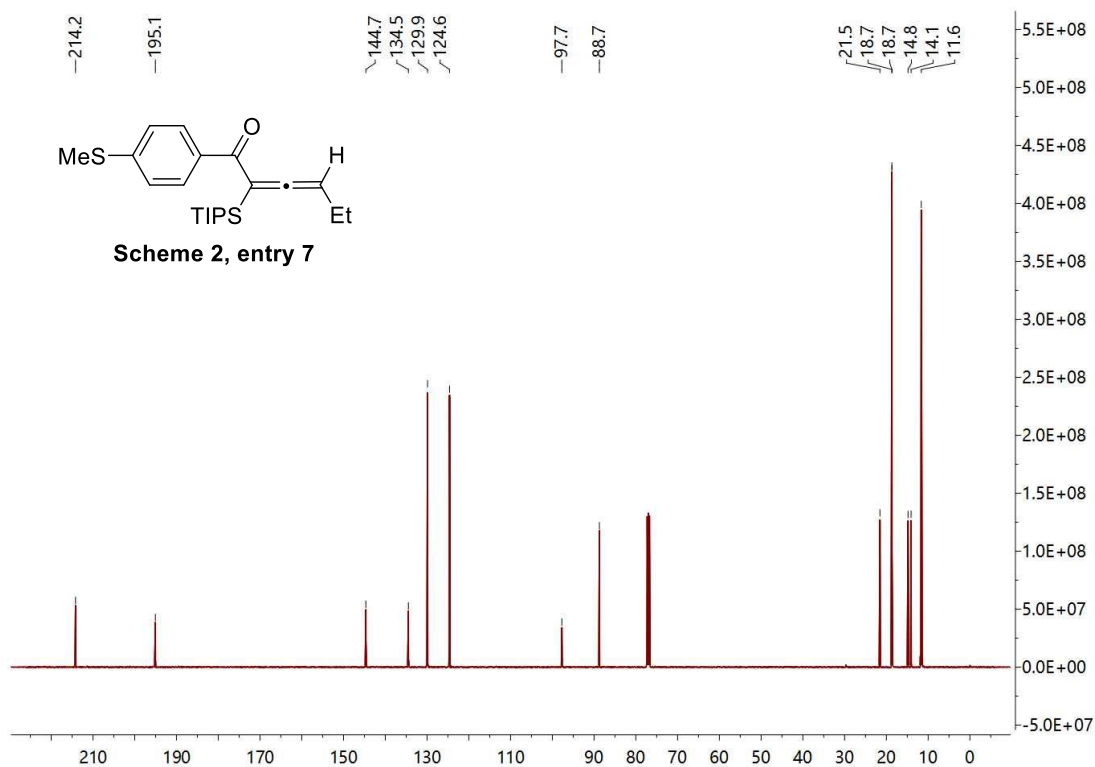



$^1\text{H}$  NMR (500 MHz,  $\text{CDCl}_3$ )

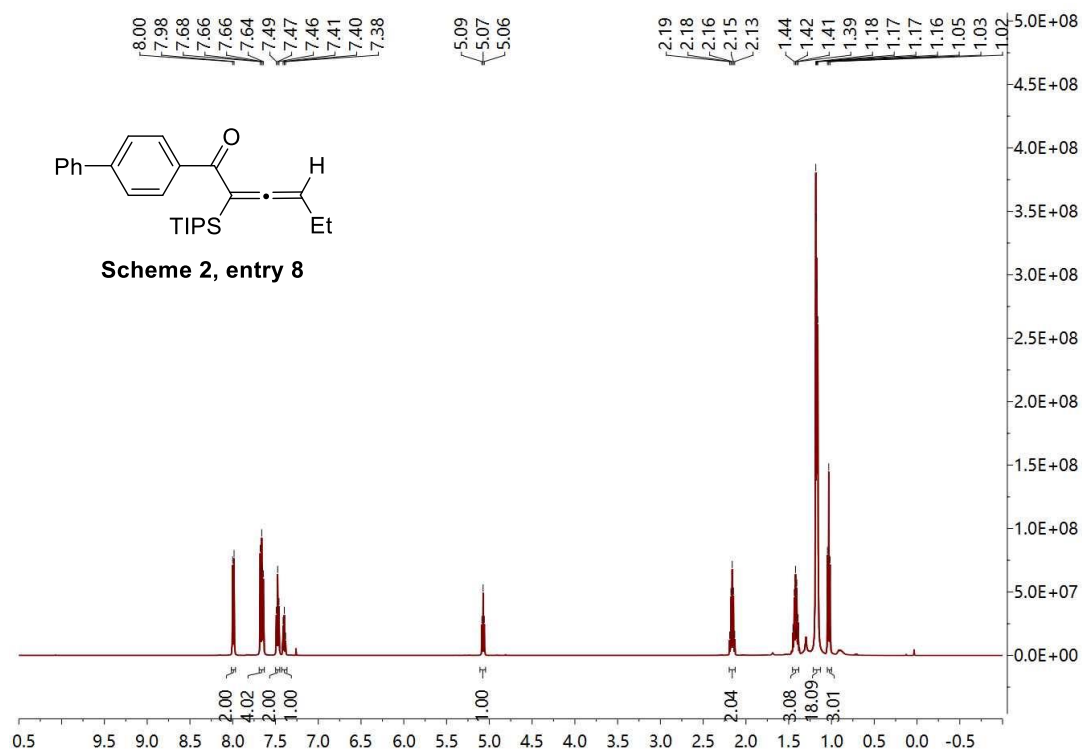

$^{13}\text{C}$  NMR (126 MHz,  $\text{CDCl}_3$ )

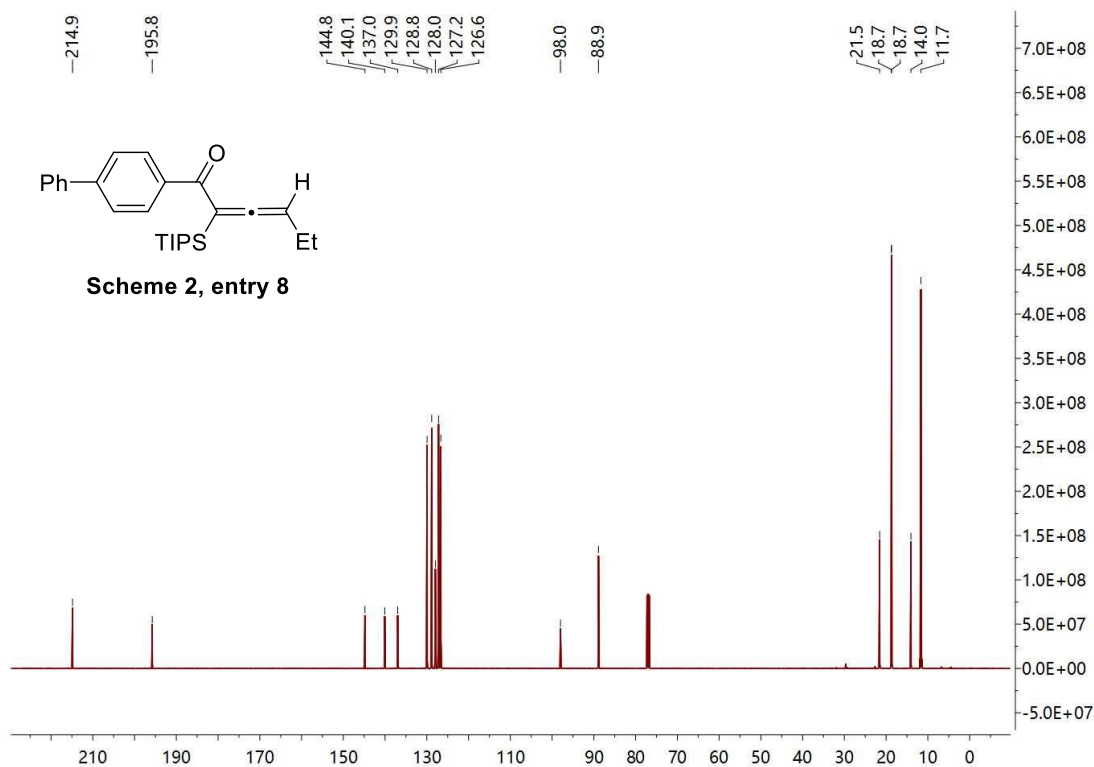

<sup>1</sup>H NMR (500 MHz, CDCl<sub>3</sub>)

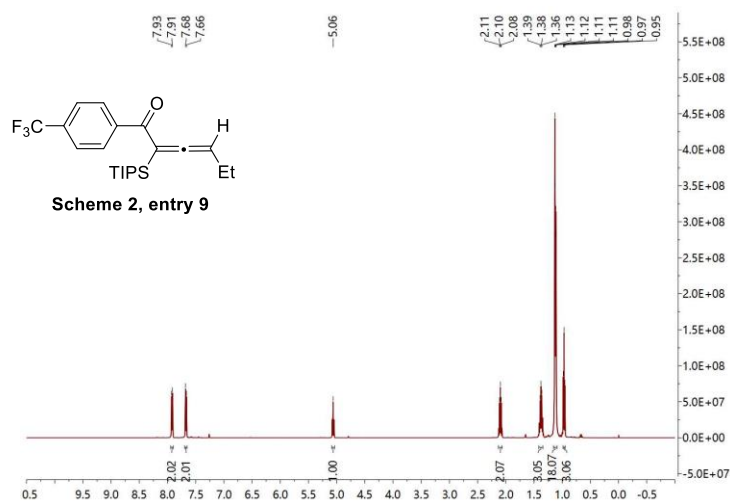

<sup>13</sup>C NMR (126 MHz, CDCl<sub>3</sub>)

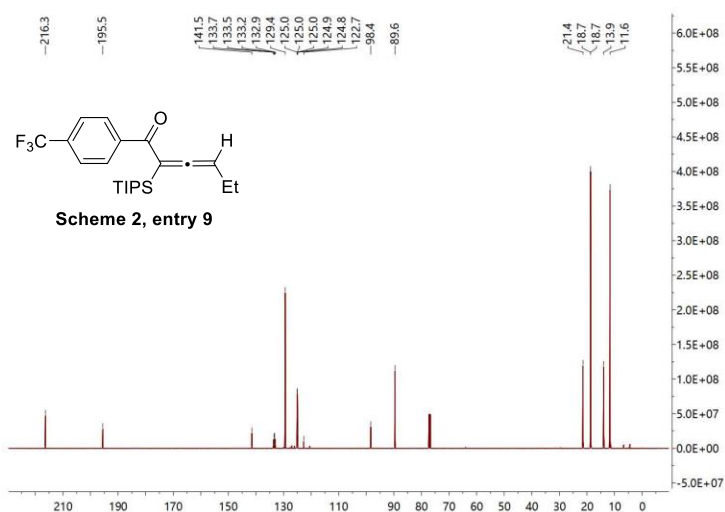

<sup>19</sup>F NMR (471 MHz, CDCl<sub>3</sub>)

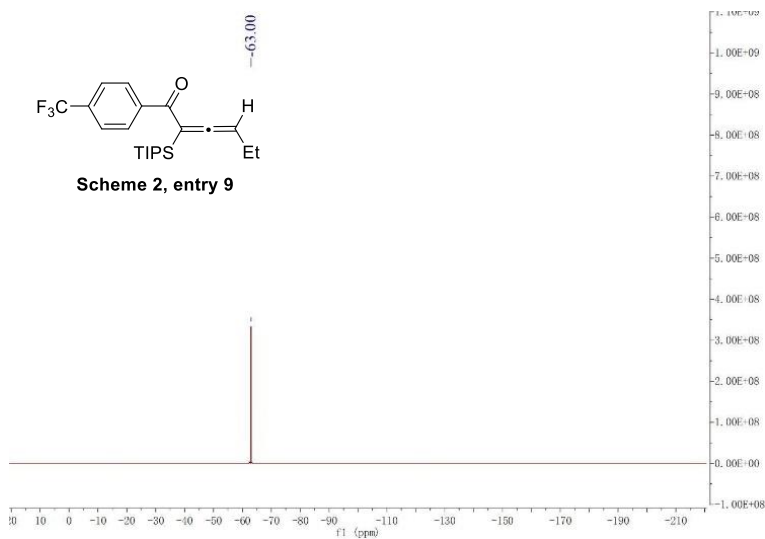

**<sup>1</sup>H NMR (500 MHz, CDCl<sub>3</sub>)**

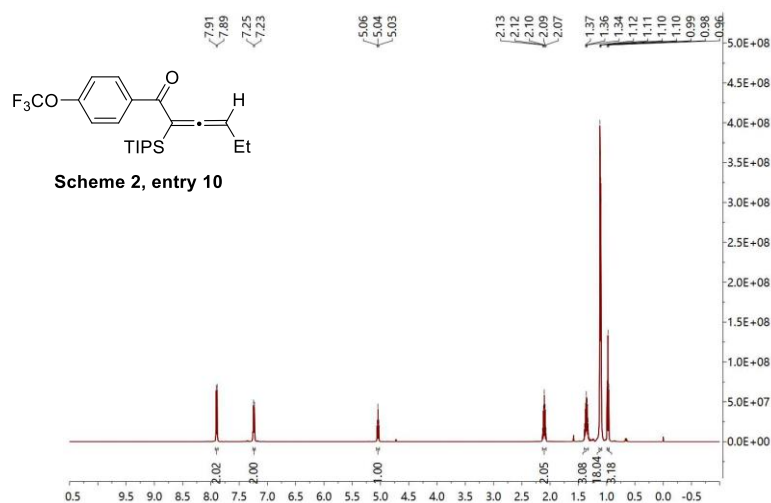

**<sup>13</sup>C NMR (126 MHz, CDCl<sub>3</sub>)**

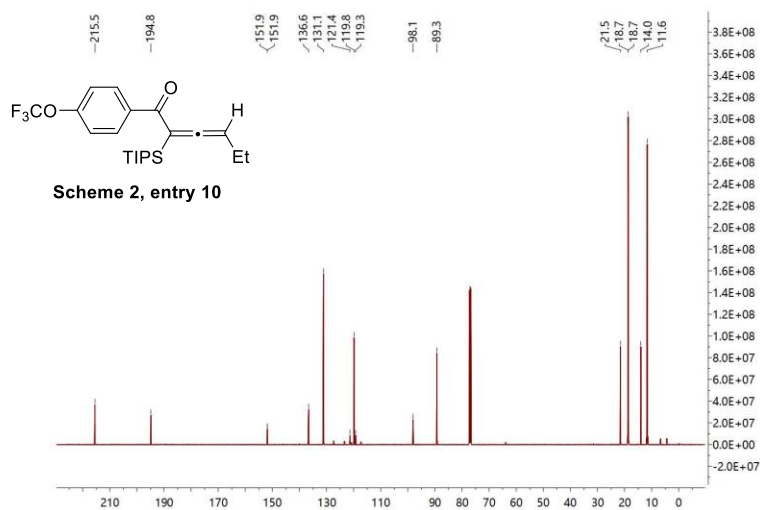

**<sup>19</sup>F NMR (471 MHz, CDCl<sub>3</sub>)**

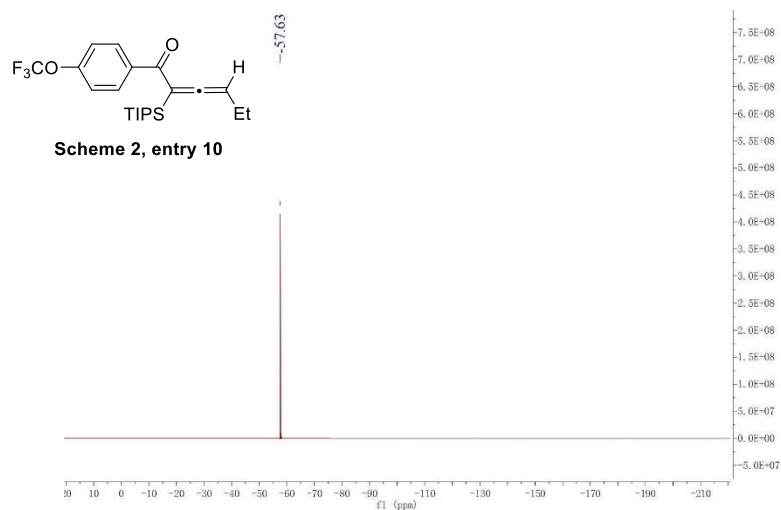

$^1\text{H}$  NMR (500 MHz,  $\text{CDCl}_3$ )

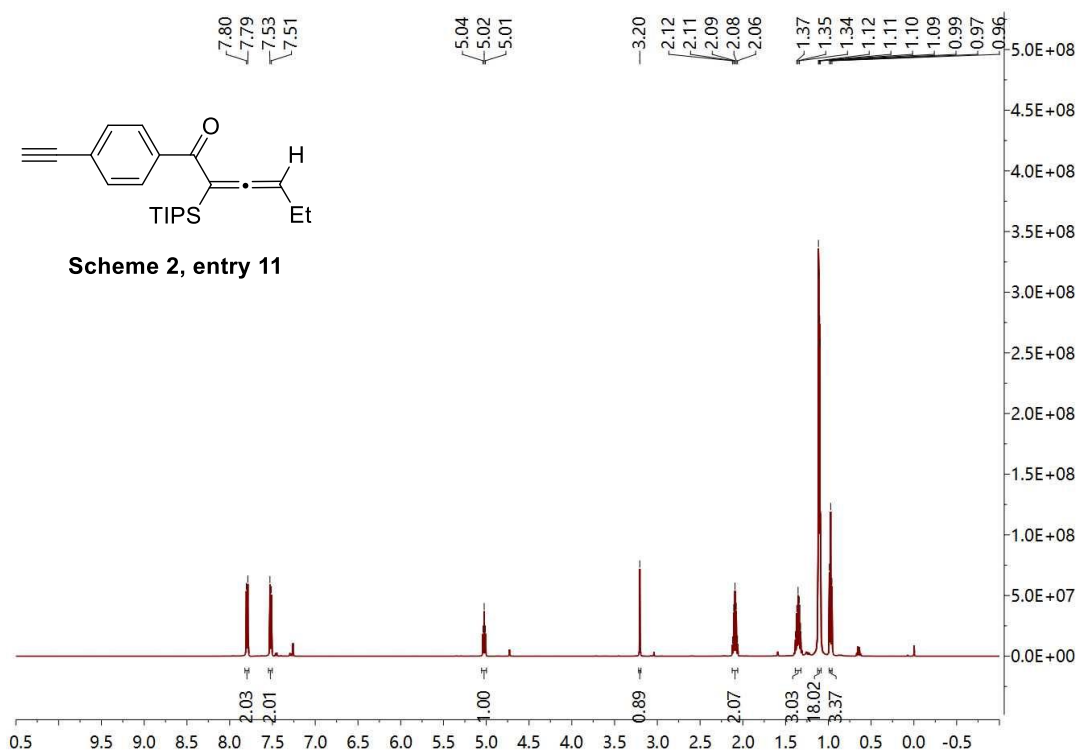

$^{13}\text{C}$  NMR (126 MHz,  $\text{CDCl}_3$ )

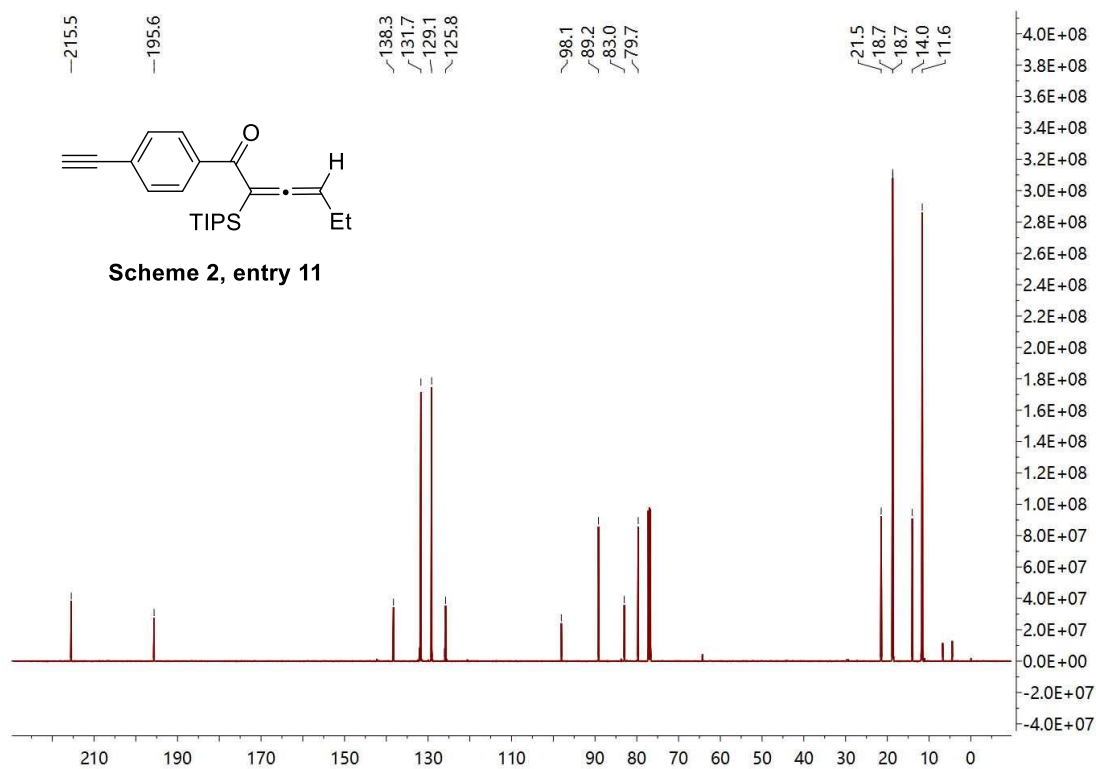

$^1\text{H}$  NMR (500 MHz,  $\text{CDCl}_3$ )

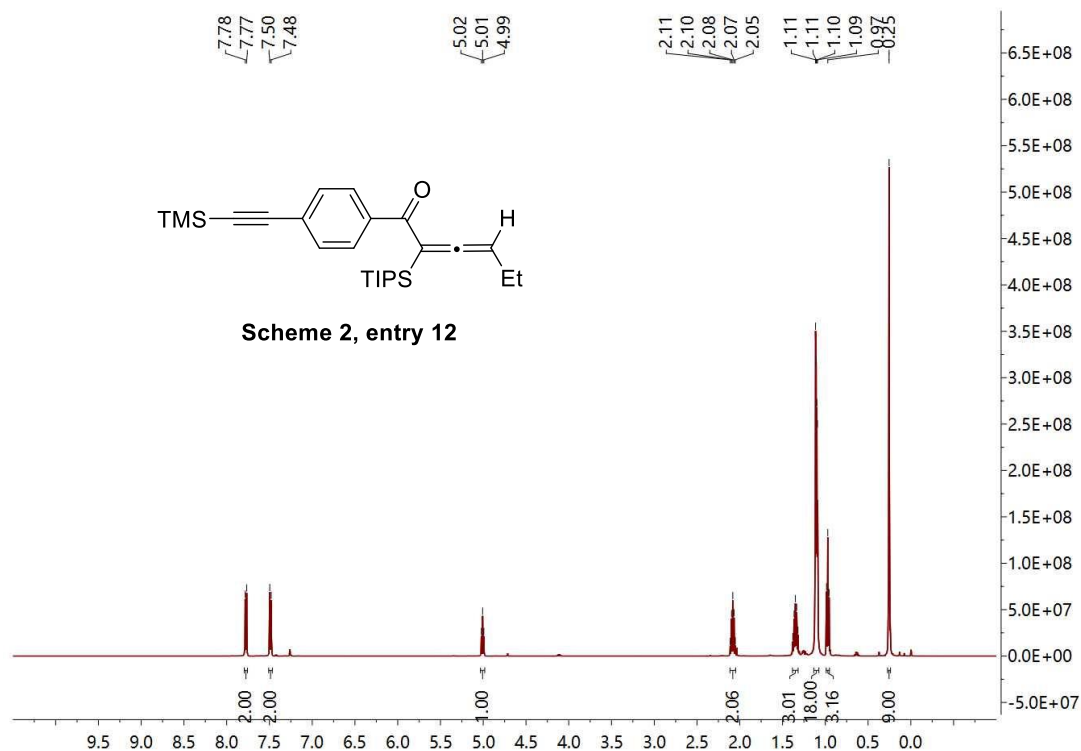

$^{13}\text{C}$  NMR (126 MHz,  $\text{CDCl}_3$ )

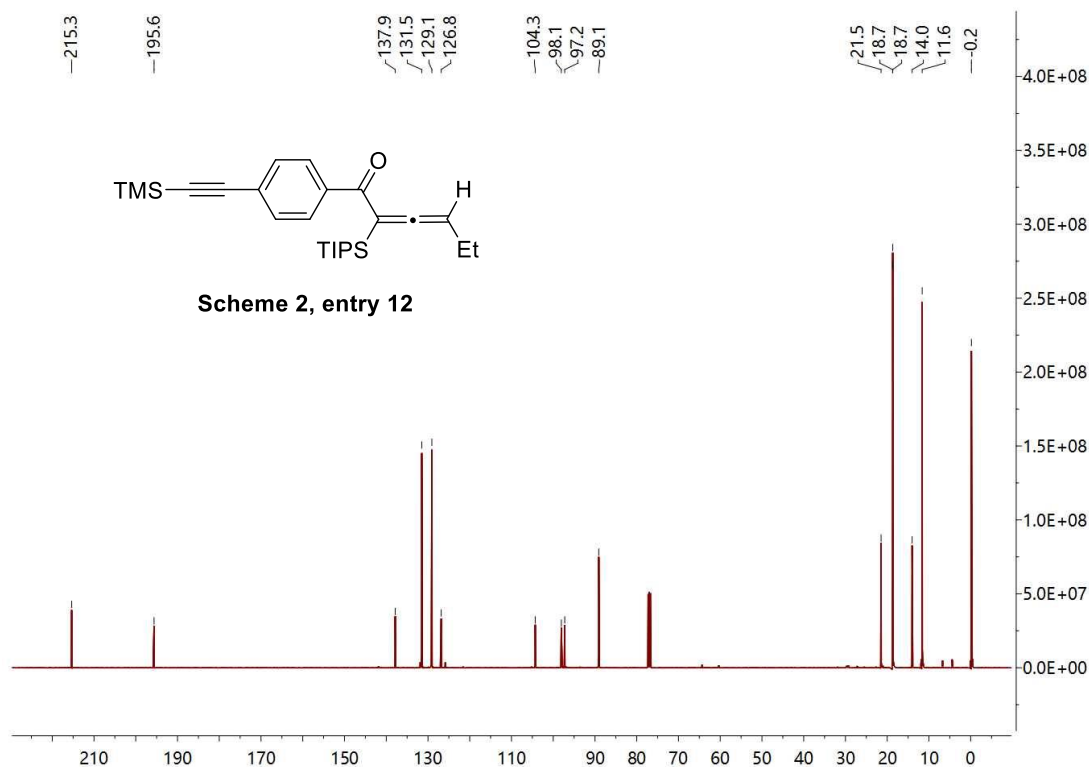

$^1\text{H}$  NMR (500 MHz,  $\text{CDCl}_3$ )

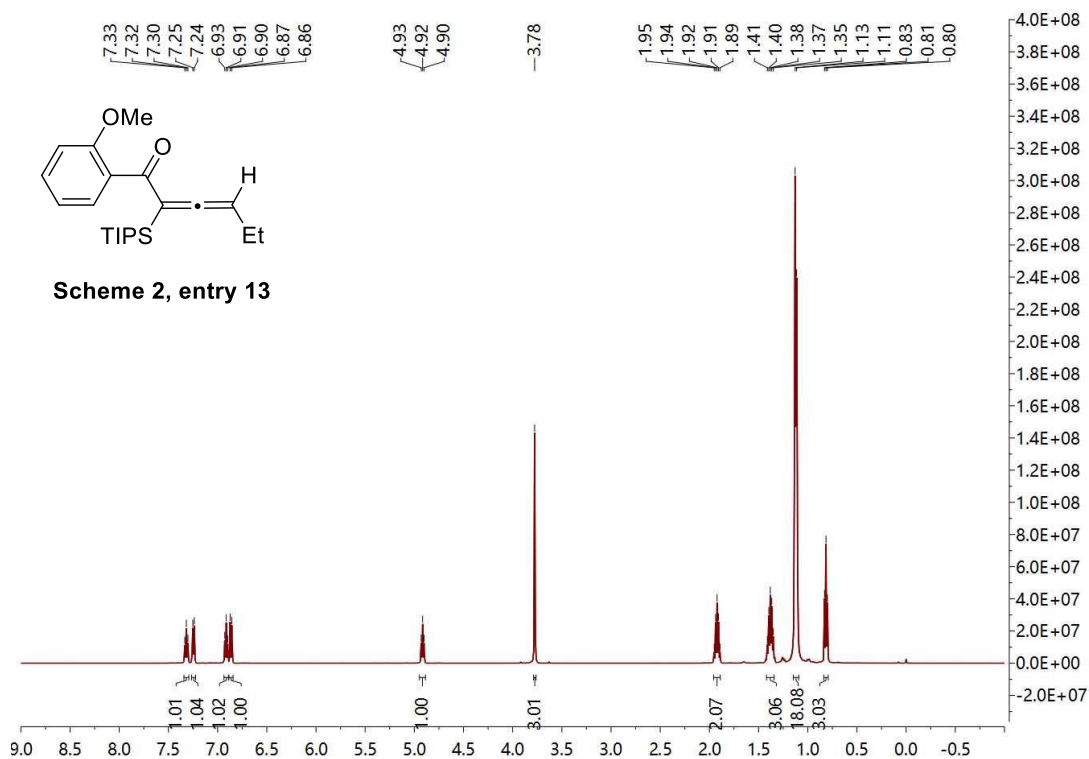

$^{13}\text{C}$  NMR (126 MHz,  $\text{CDCl}_3$ )

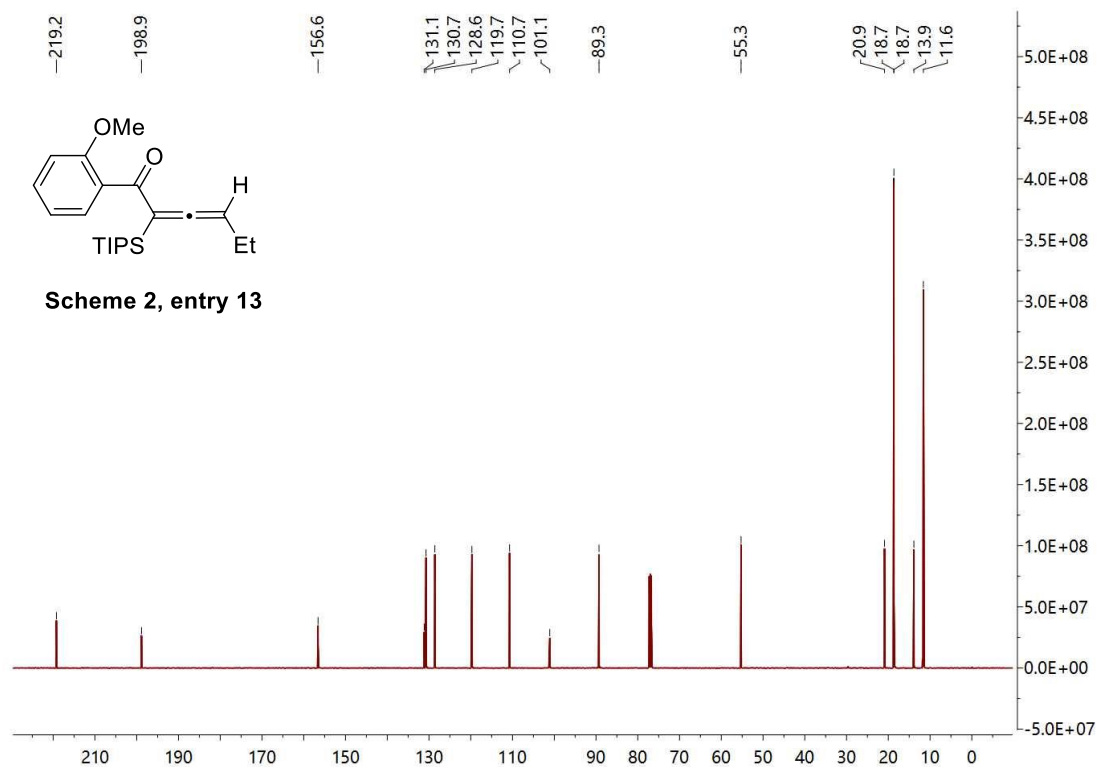

<sup>1</sup>H NMR (500 MHz, CDCl<sub>3</sub>)

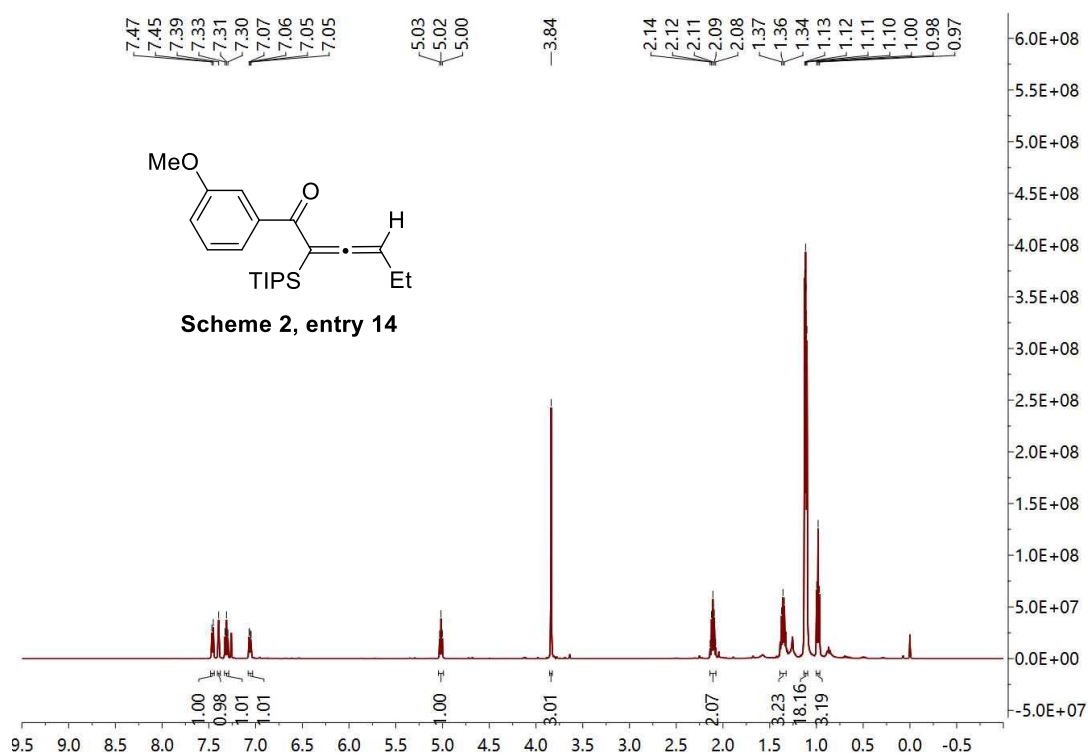

<sup>13</sup>C NMR (126 MHz, CDCl<sub>3</sub>)

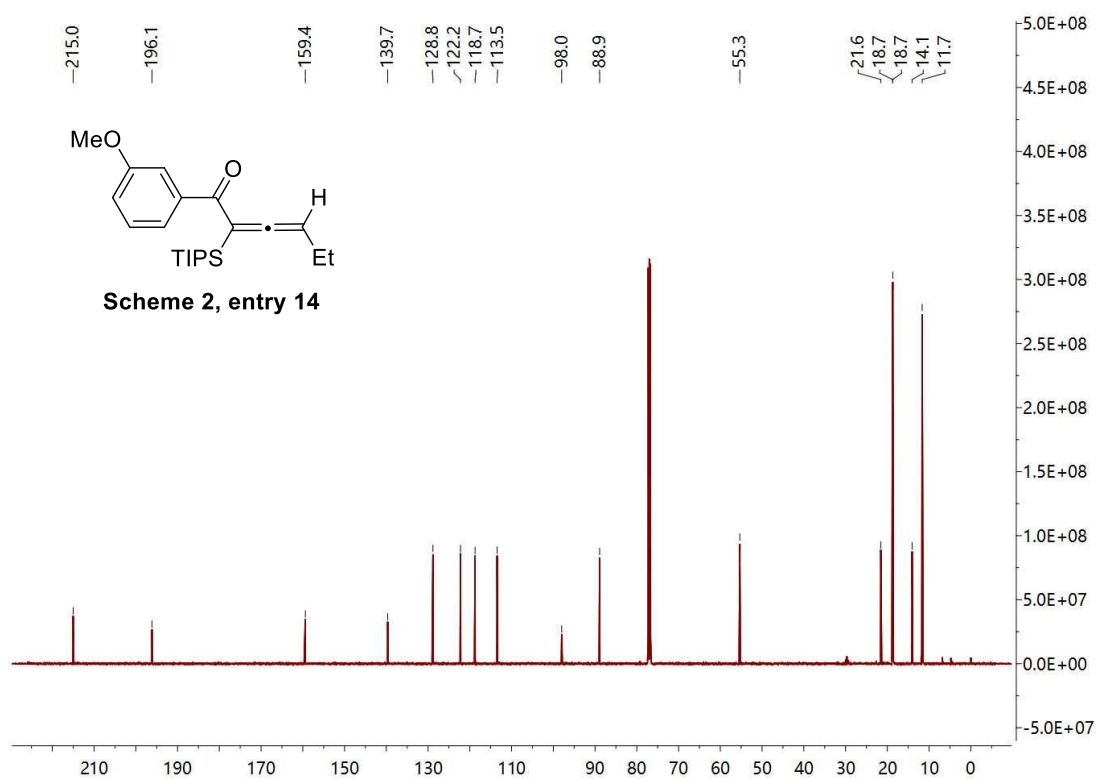

$^1\text{H}$  NMR (500 MHz,  $\text{CDCl}_3$ )

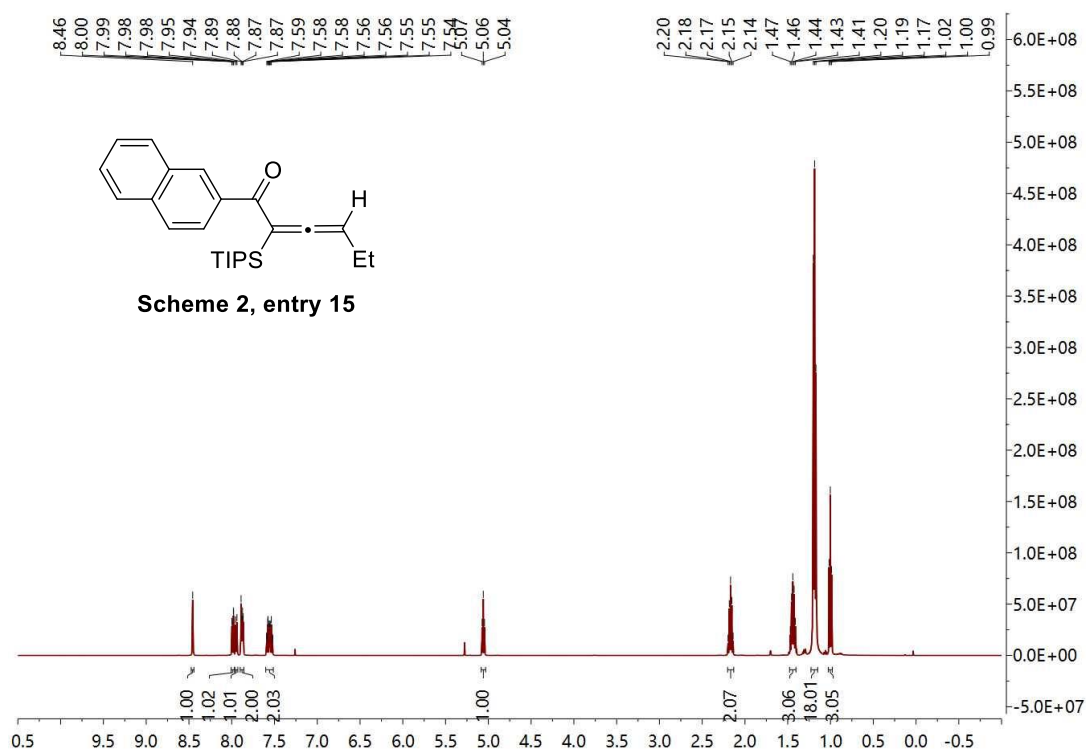

$^{13}\text{C}$  NMR (126 MHz,  $\text{CDCl}_3$ )

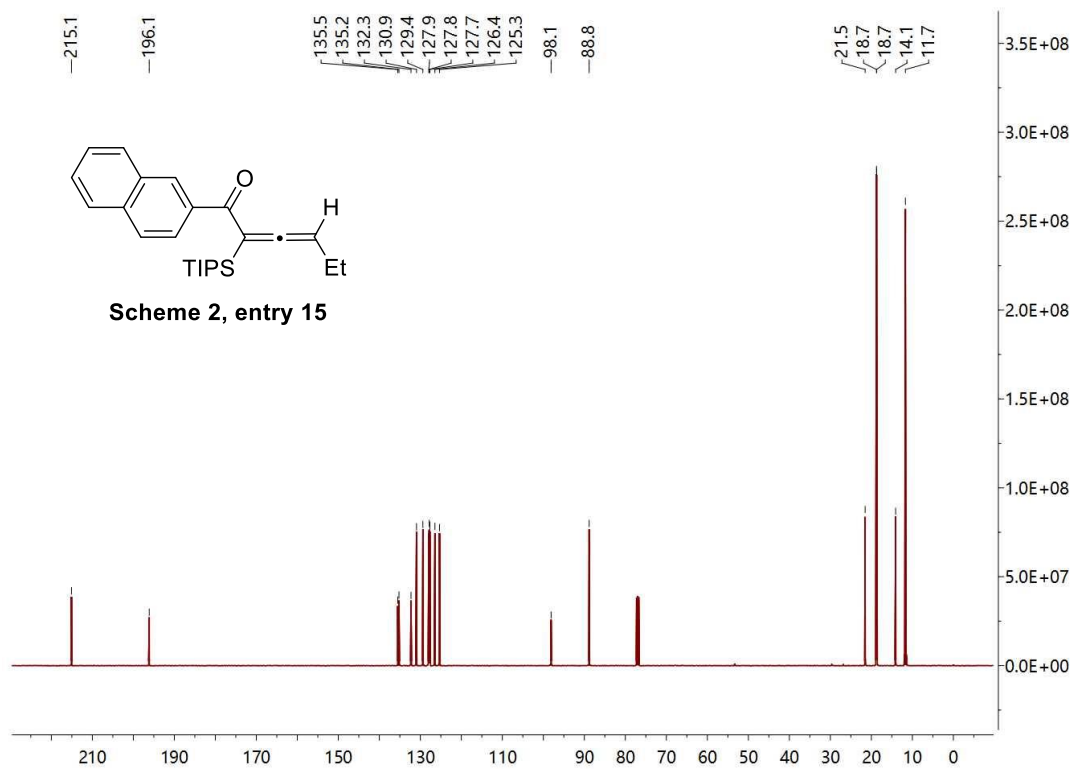



<sup>1</sup>H NMR (500 MHz, CDCl<sub>3</sub>)

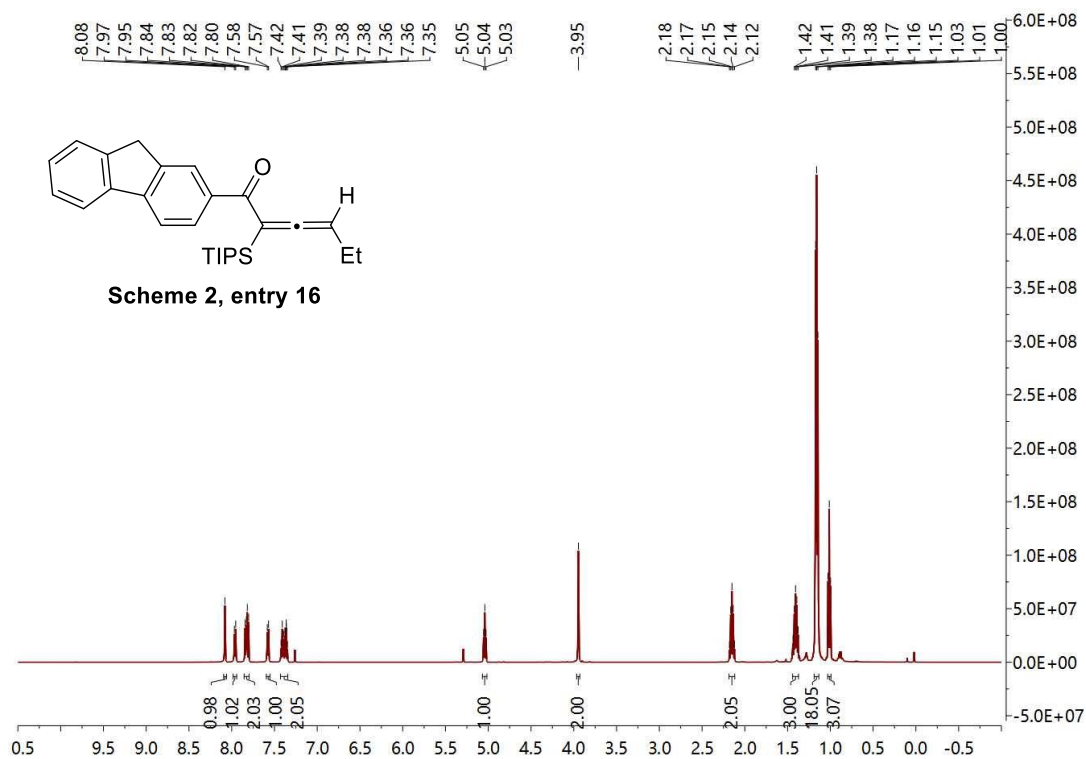

<sup>13</sup>C NMR (126 MHz, CDCl<sub>3</sub>)

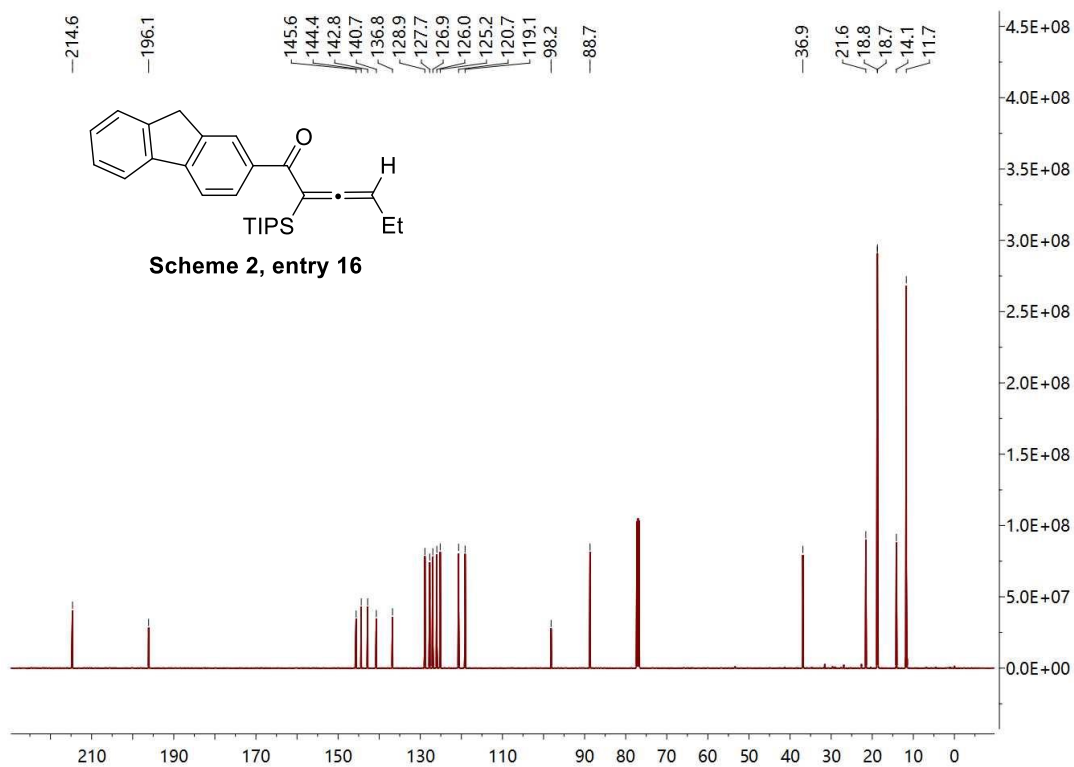

<sup>1</sup>H NMR (500 MHz, CDCl<sub>3</sub>)

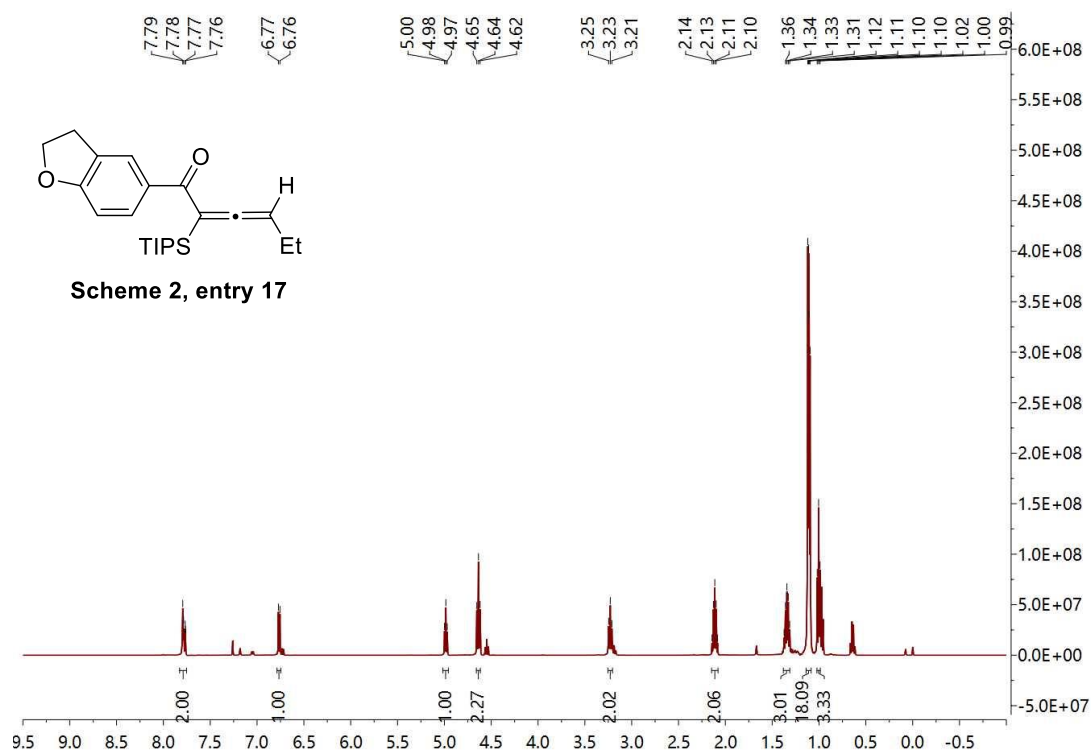

<sup>13</sup>C NMR (126 MHz, CDCl<sub>3</sub>)

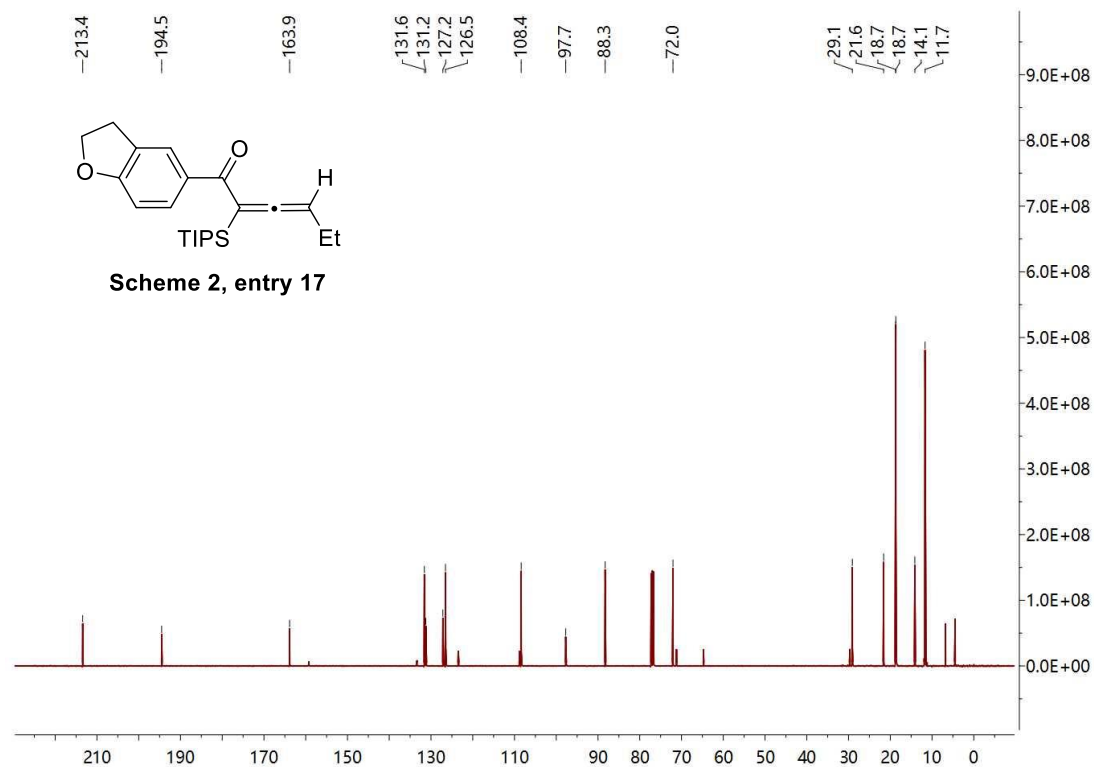

$^1\text{H}$  NMR (500 MHz,  $\text{CDCl}_3$ )

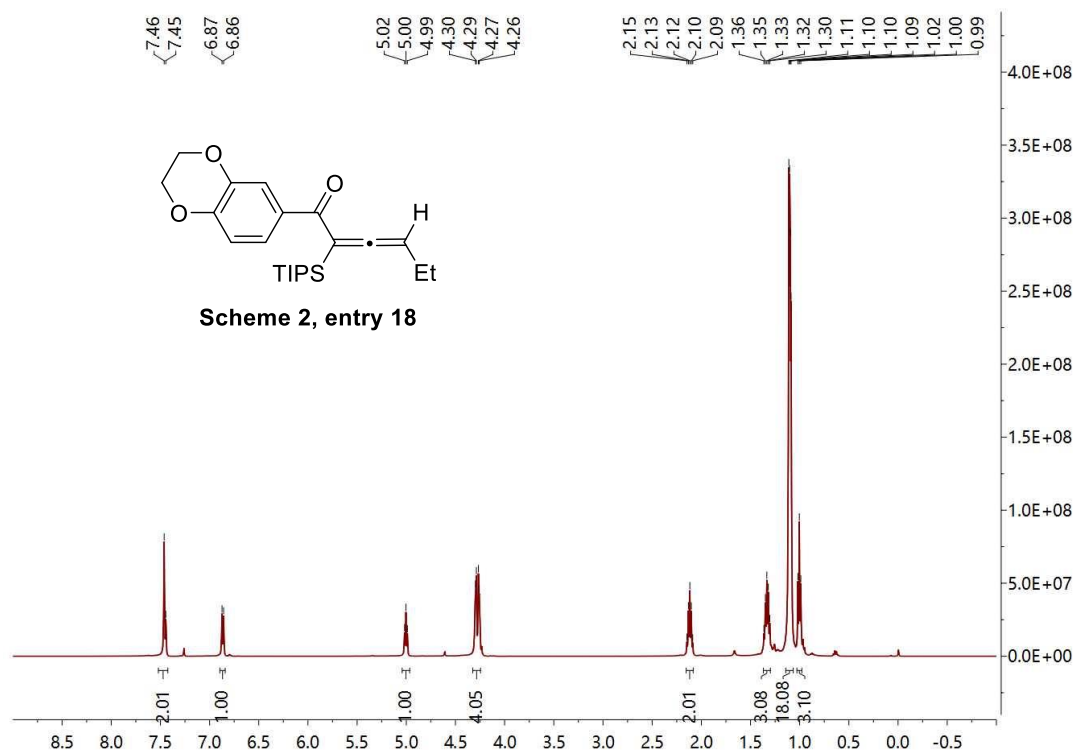

$^{13}\text{C}$  NMR (126 MHz,  $\text{CDCl}_3$ )

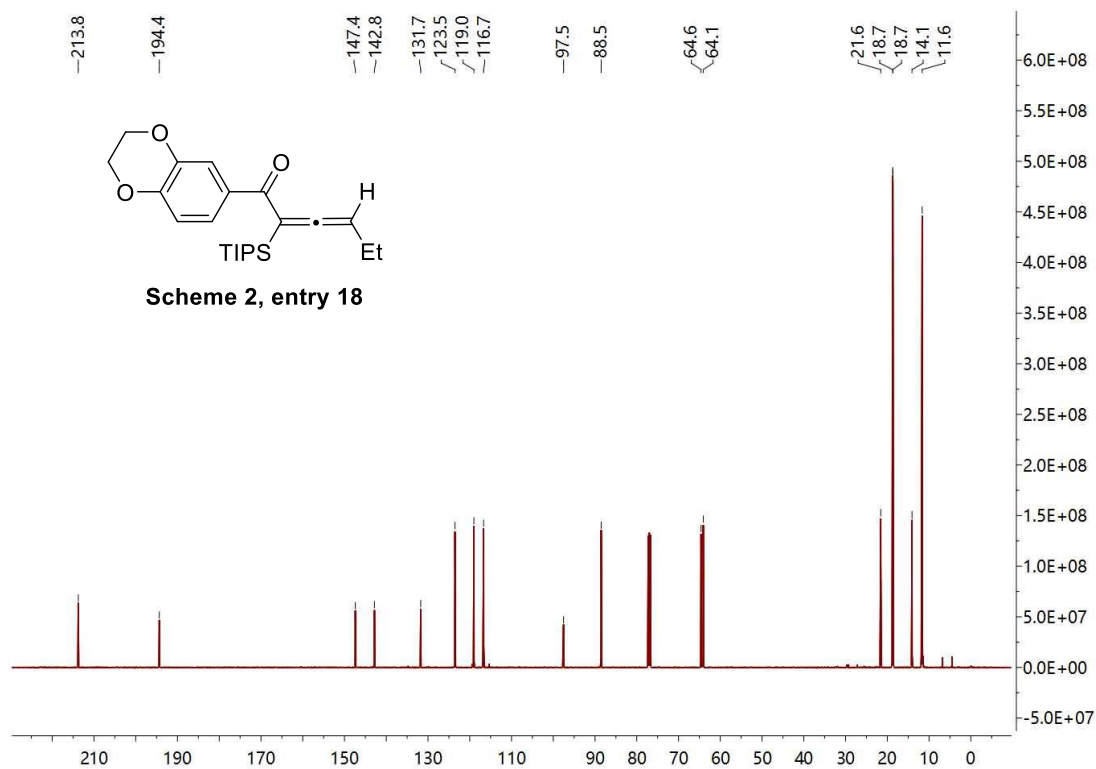

**$^1\text{H}$  NMR (500 MHz,  $\text{CDCl}_3$ )**

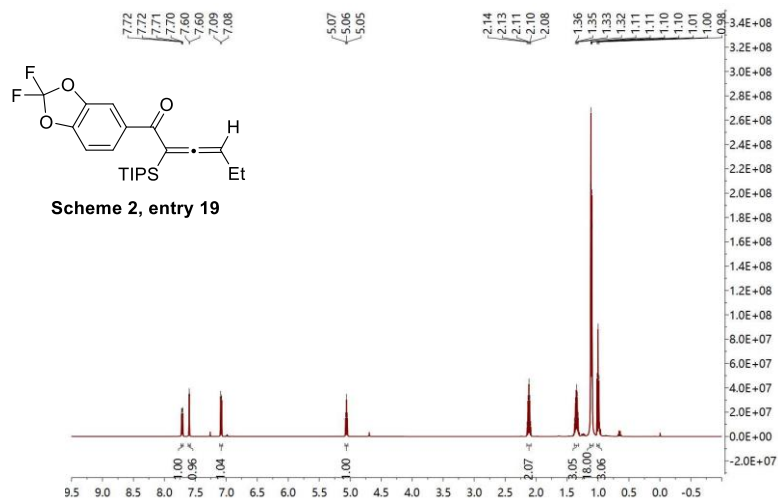

**$^{13}\text{C}$  NMR (126 MHz,  $\text{CDCl}_3$ )**

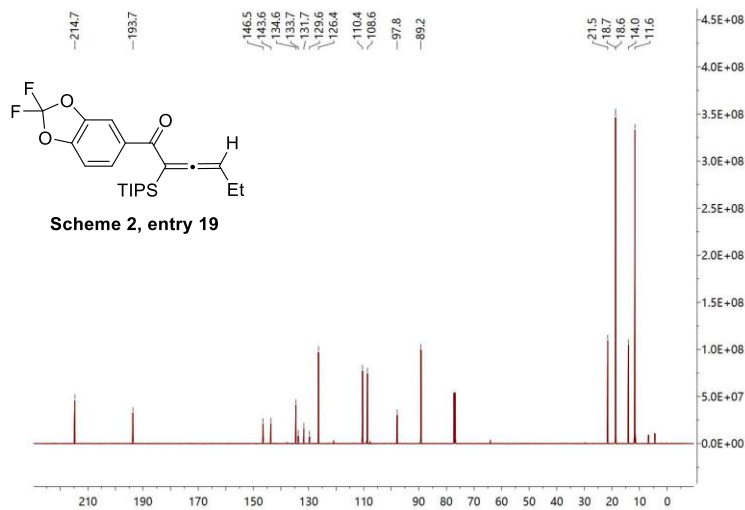

**$^{19}\text{F}$  NMR (471 MHz,  $\text{CDCl}_3$ )**

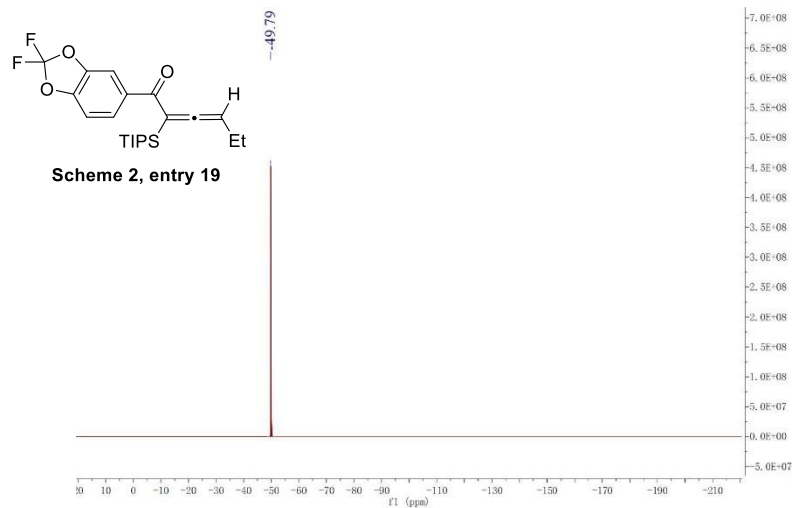

<sup>1</sup>H NMR (500 MHz, CDCl<sub>3</sub>)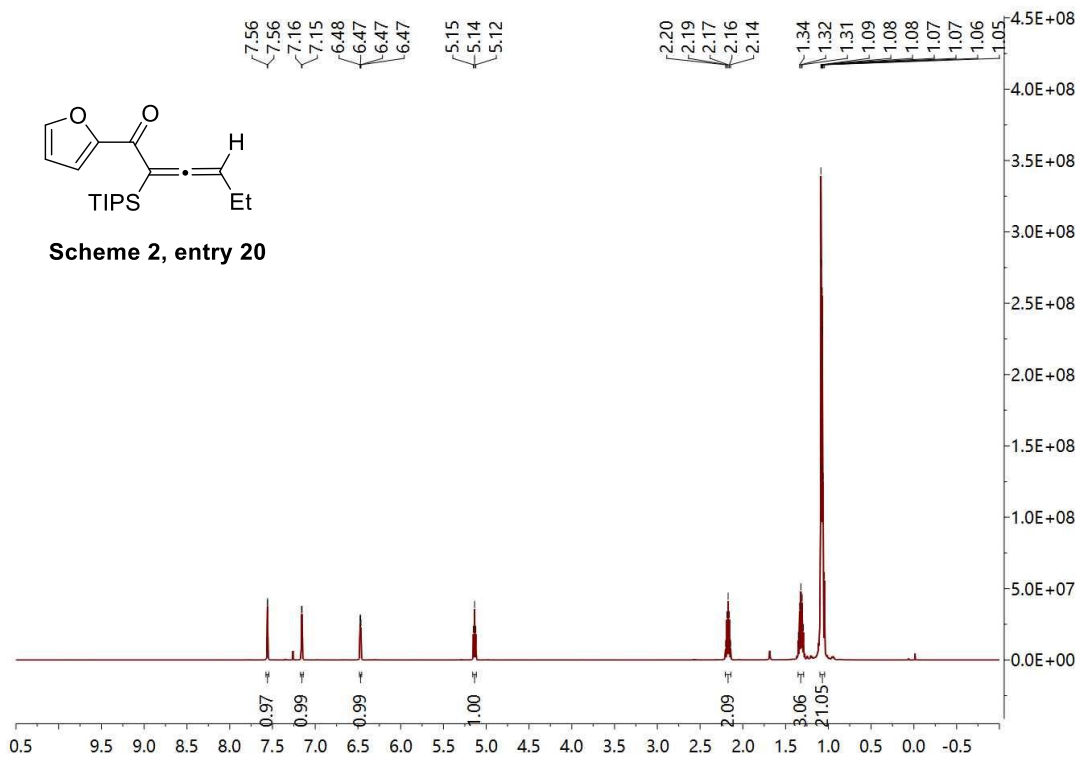

**<sup>13</sup>C NMR (126 MHz, CDCl<sub>3</sub>)**

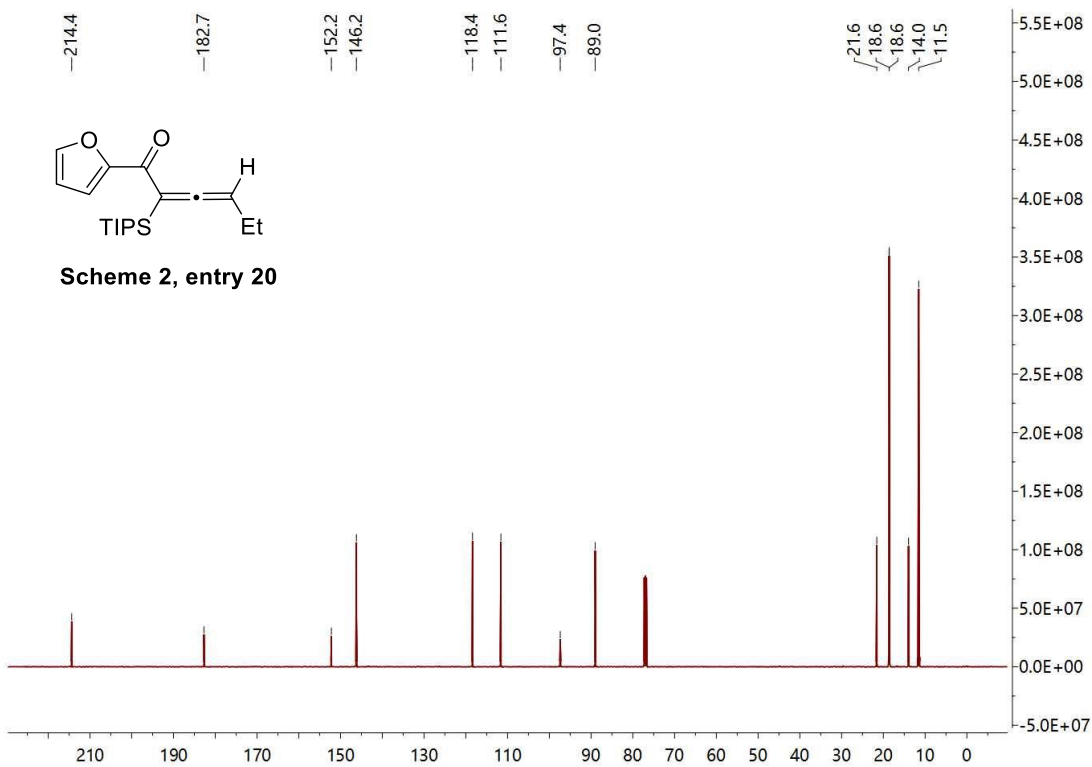

$^1\text{H}$  NMR (500 MHz,  $\text{CDCl}_3$ )

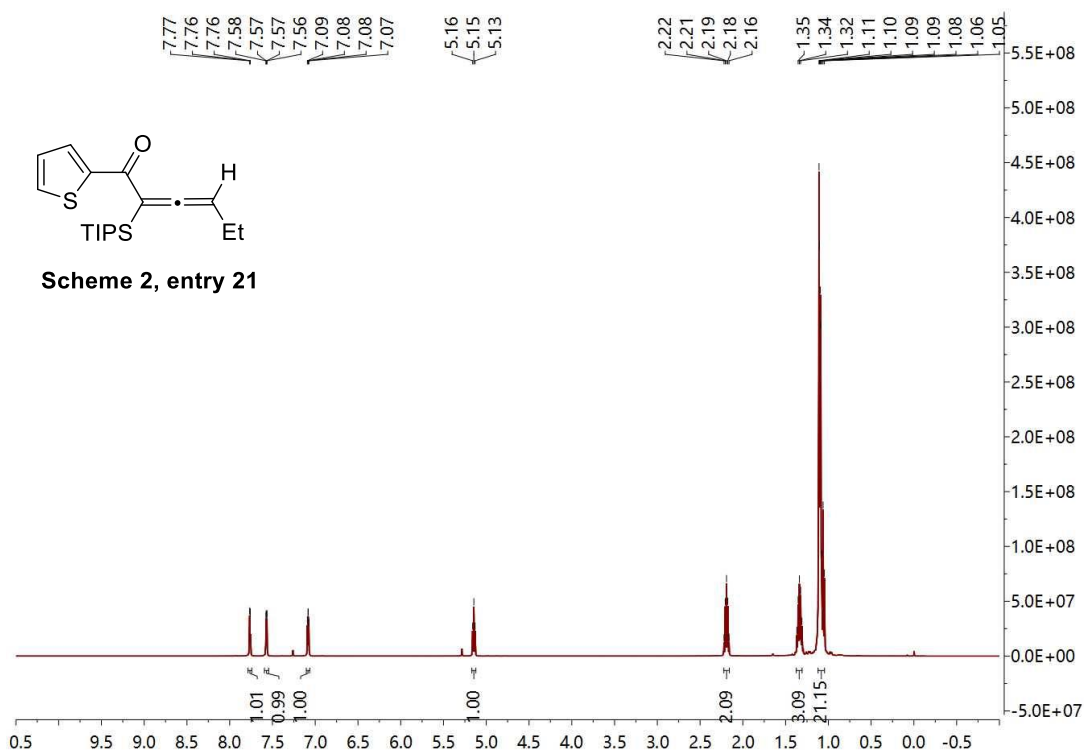

Scheme 2, entry 21

$^{13}\text{C}$  NMR (126 MHz,  $\text{CDCl}_3$ )

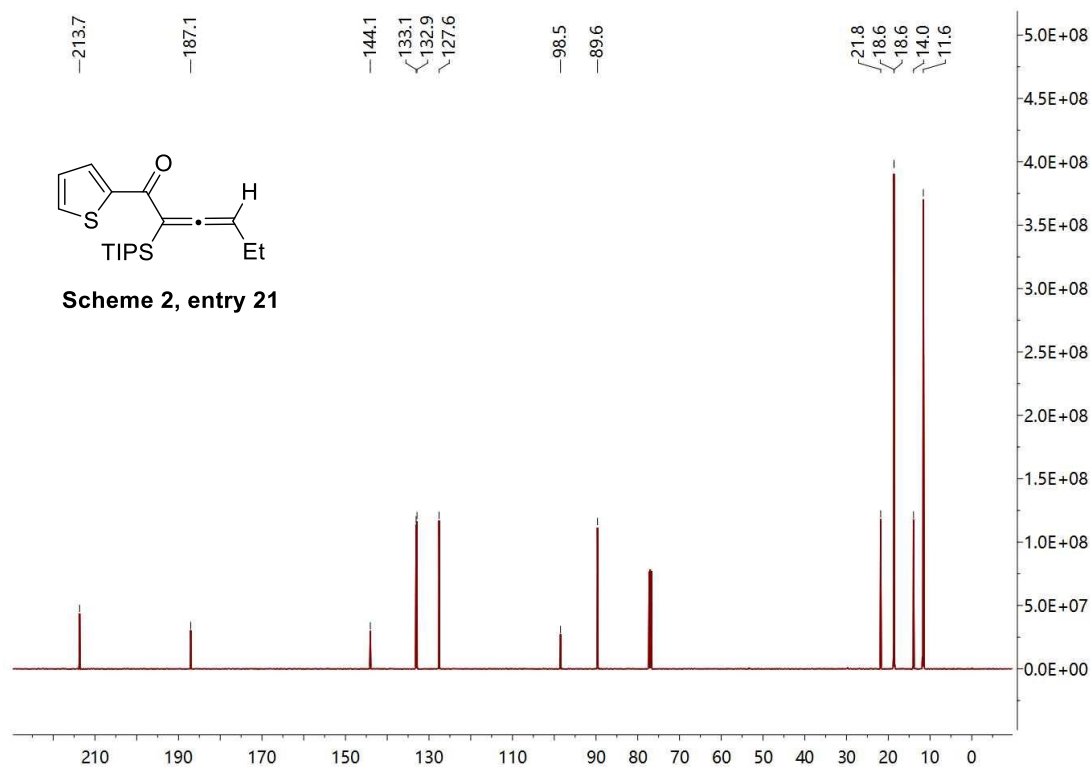

Scheme 2, entry 21

<sup>1</sup>H NMR (500 MHz, CDCl<sub>3</sub>)

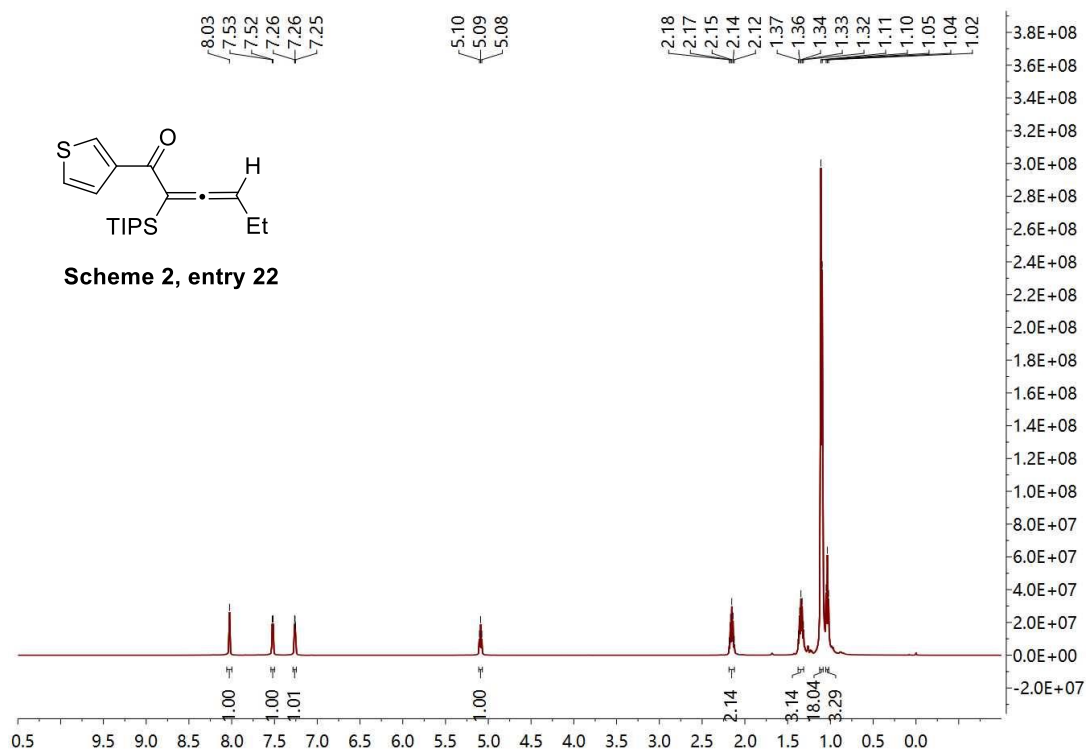

<sup>13</sup>C NMR (126 MHz, CDCl<sub>3</sub>)

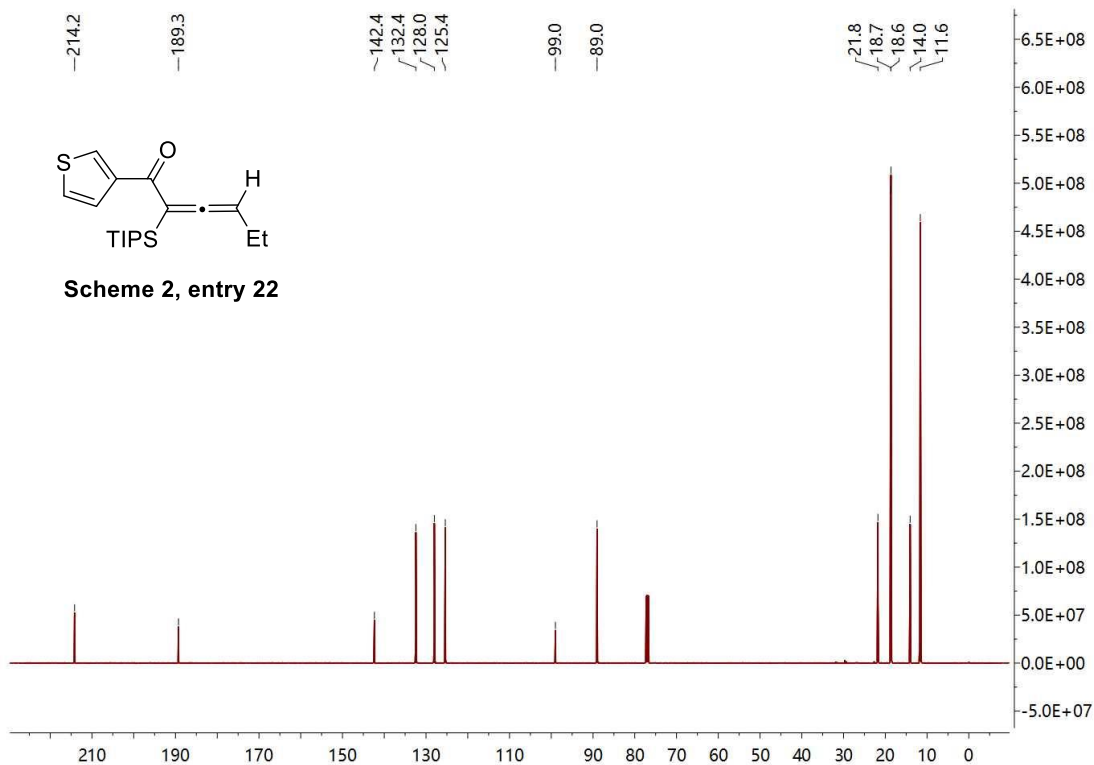

$^1\text{H}$  NMR (500 MHz,  $\text{CDCl}_3$ )

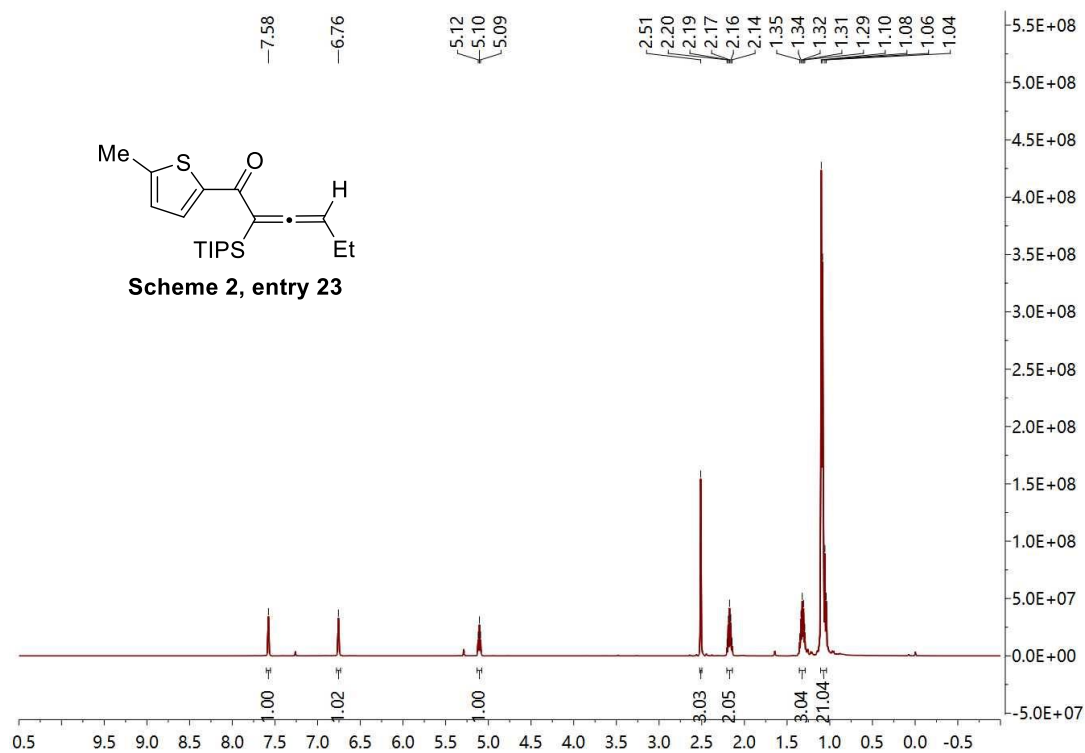

$^{13}\text{C}$  NMR (126 MHz,  $\text{CDCl}_3$ )

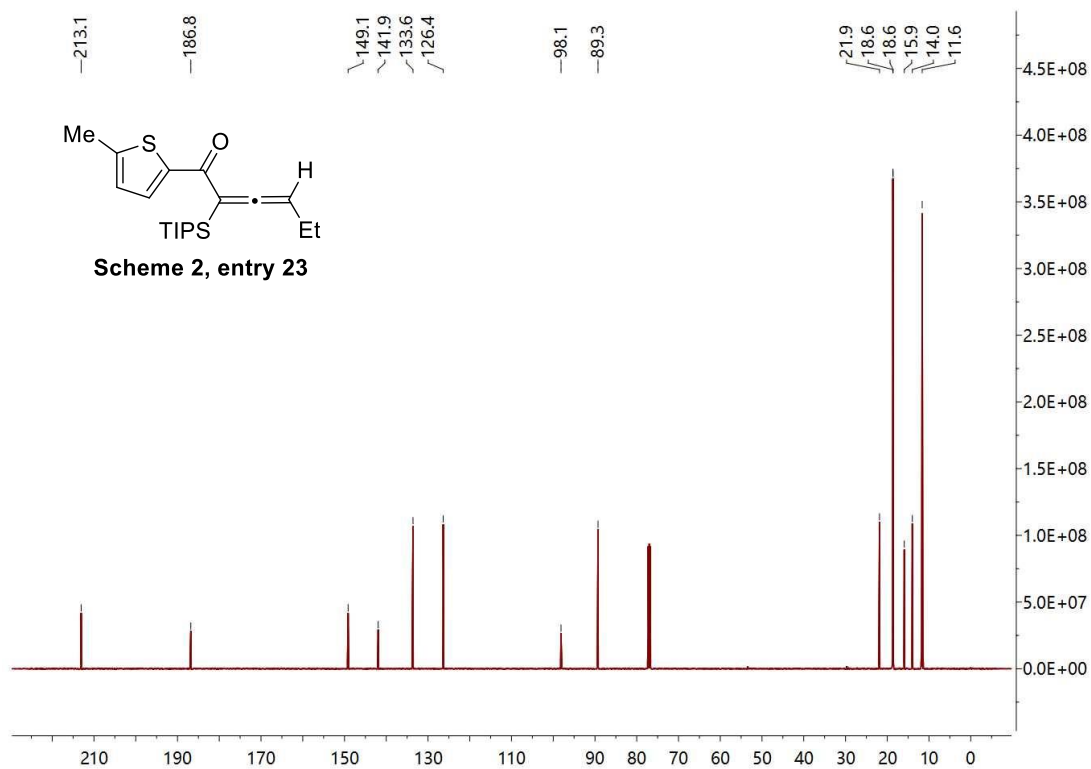



<sup>1</sup>H NMR (500 MHz, CDCl<sub>3</sub>)

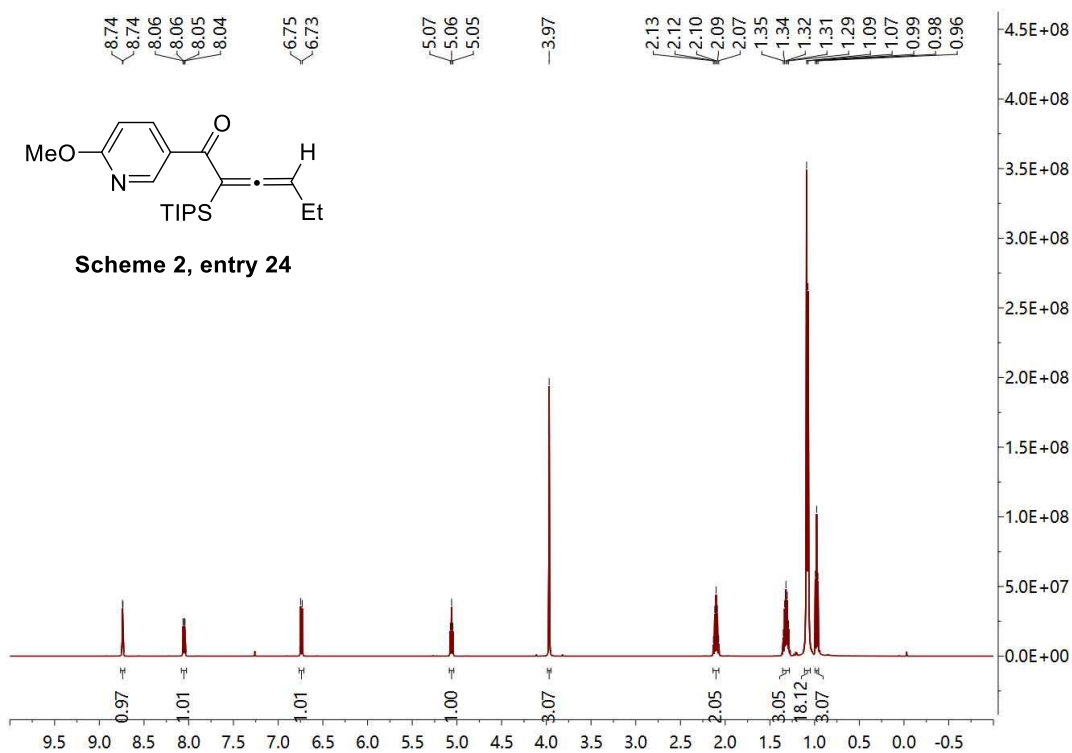

<sup>13</sup>C NMR (126 MHz, CDCl<sub>3</sub>)

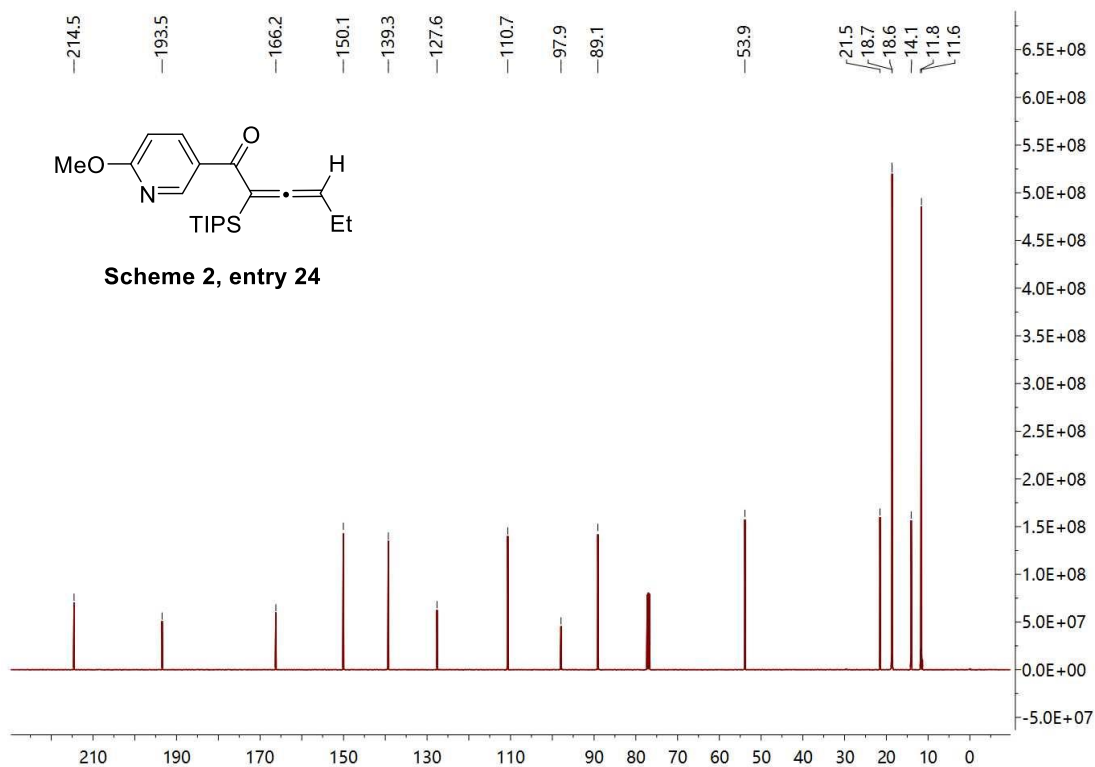

<sup>1</sup>H NMR (500 MHz, CDCl<sub>3</sub>)

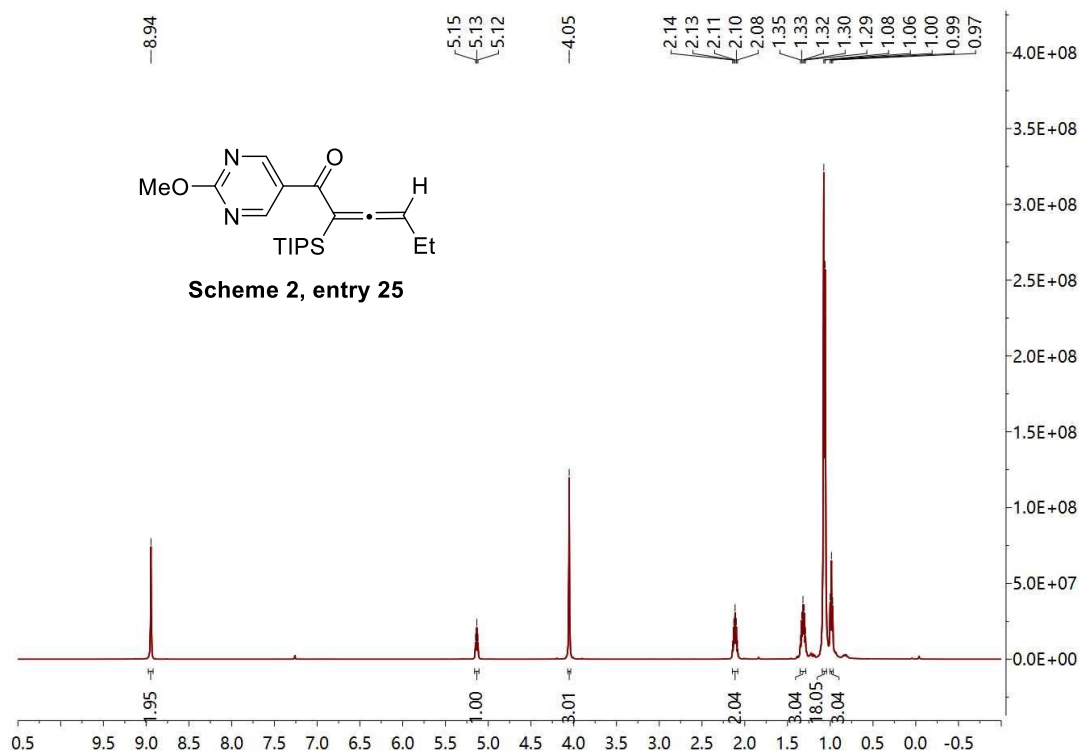

<sup>13</sup>C NMR (126 MHz, CDCl<sub>3</sub>)

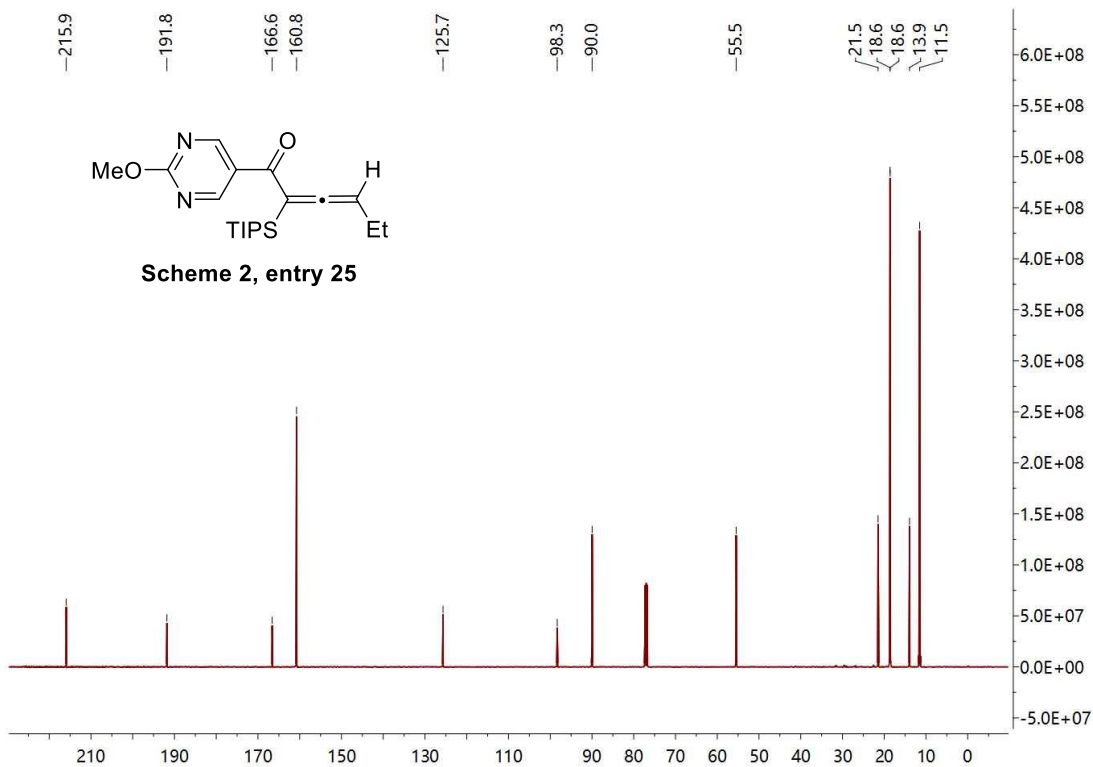

<sup>1</sup>H NMR (500 MHz, CDCl<sub>3</sub>)

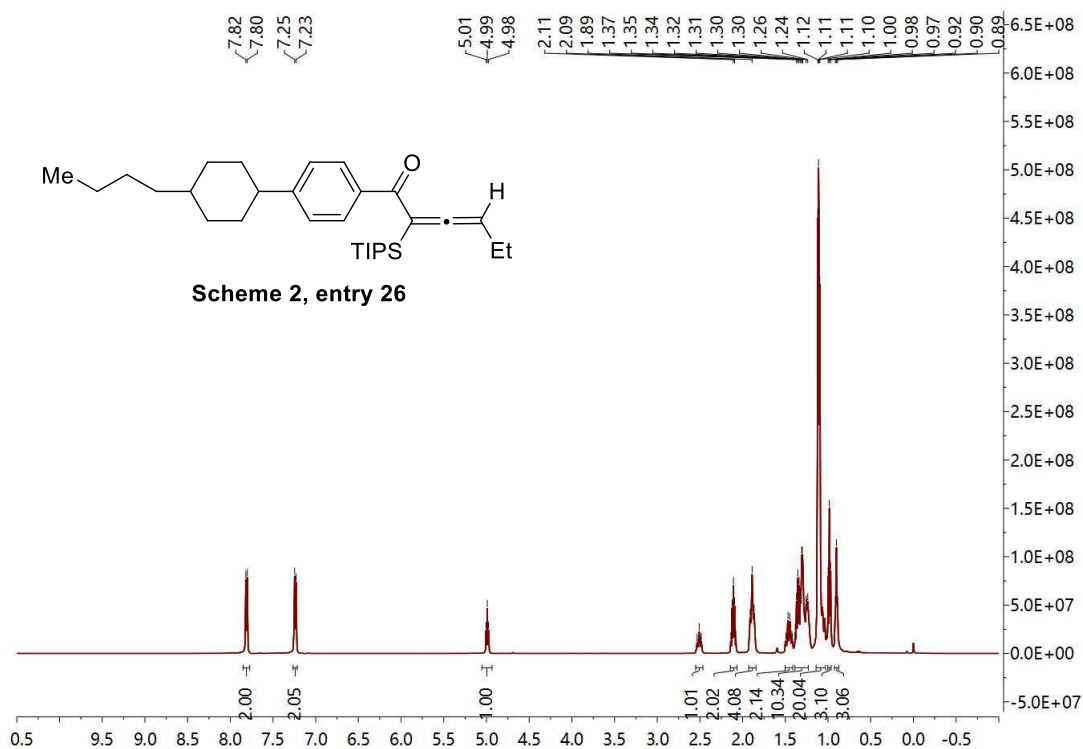

<sup>13</sup>C NMR (126 MHz, CDCl<sub>3</sub>)

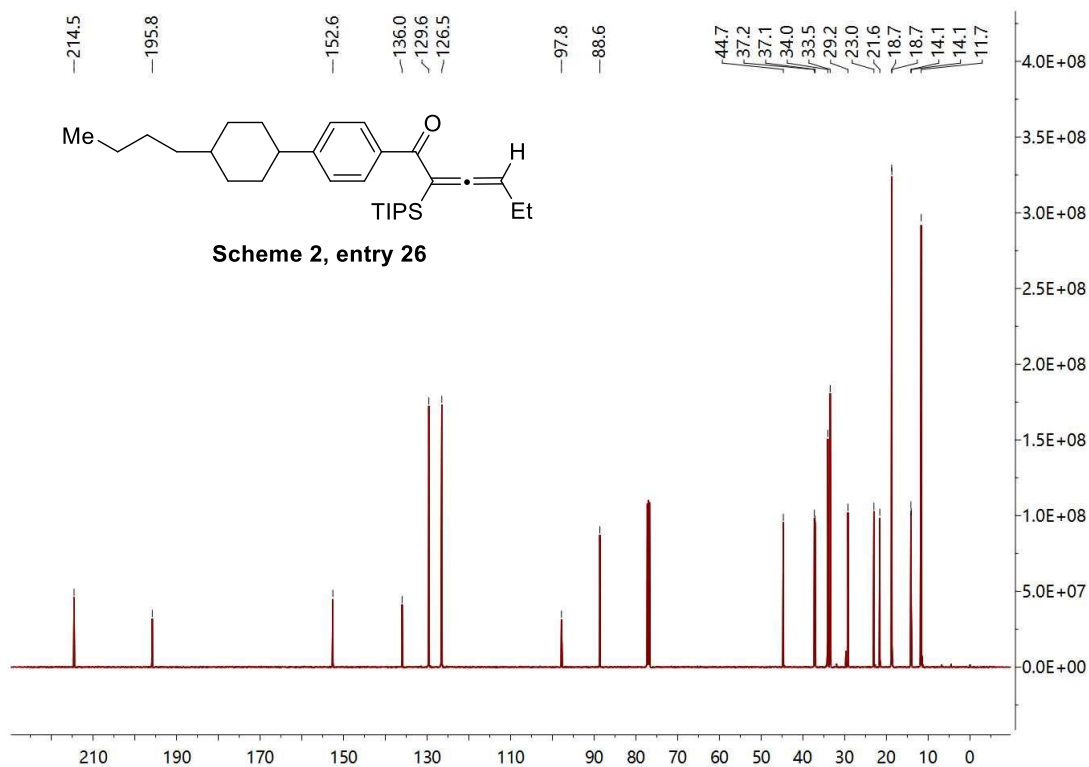

<sup>1</sup>H NMR (500 MHz, CDCl<sub>3</sub>)

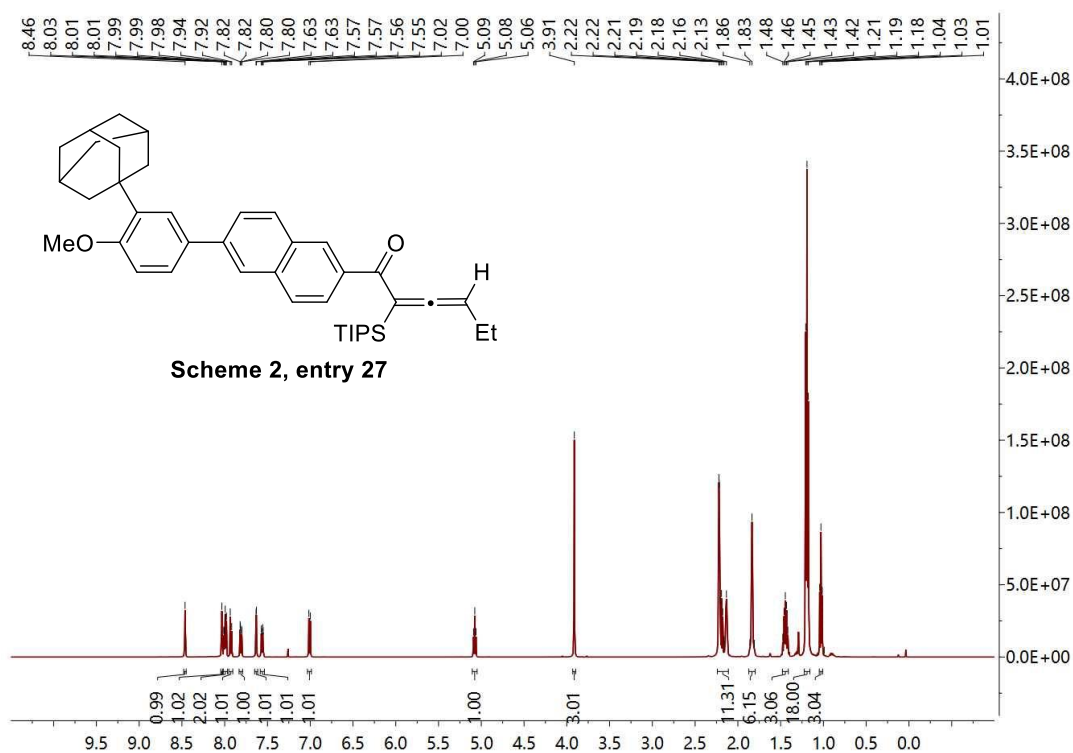

<sup>13</sup>C NMR (126 MHz, CDCl<sub>3</sub>)

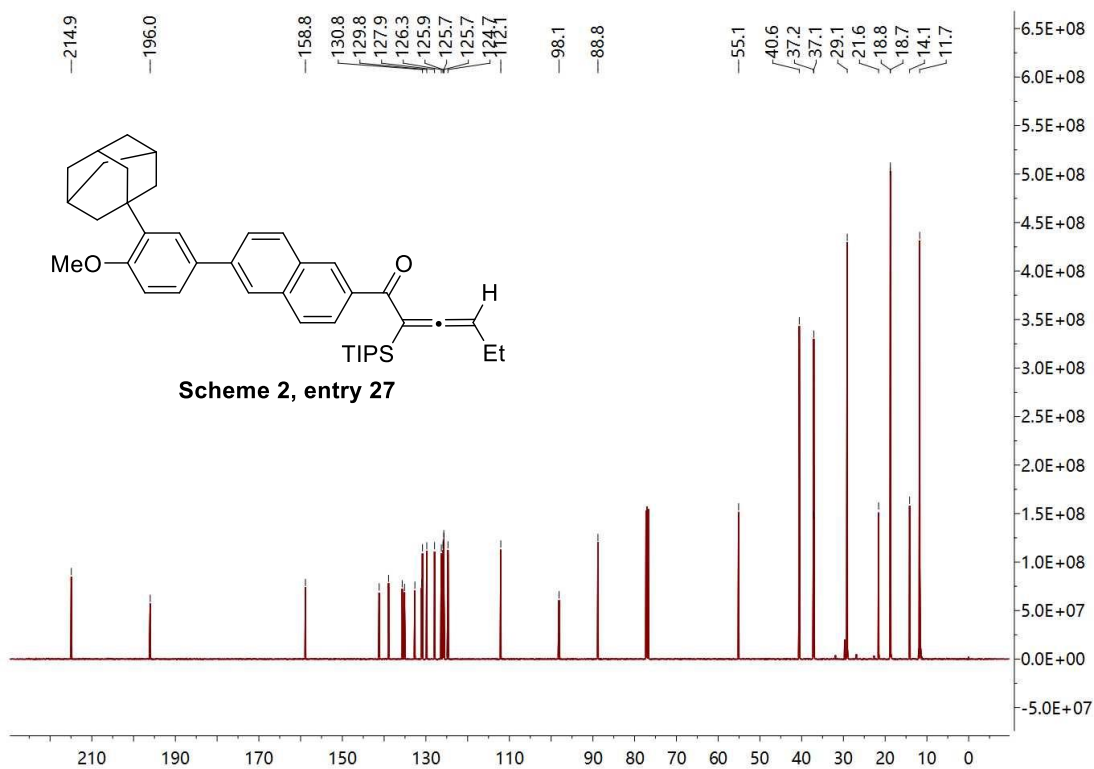

<sup>1</sup>H NMR (500 MHz, CDCl<sub>3</sub>)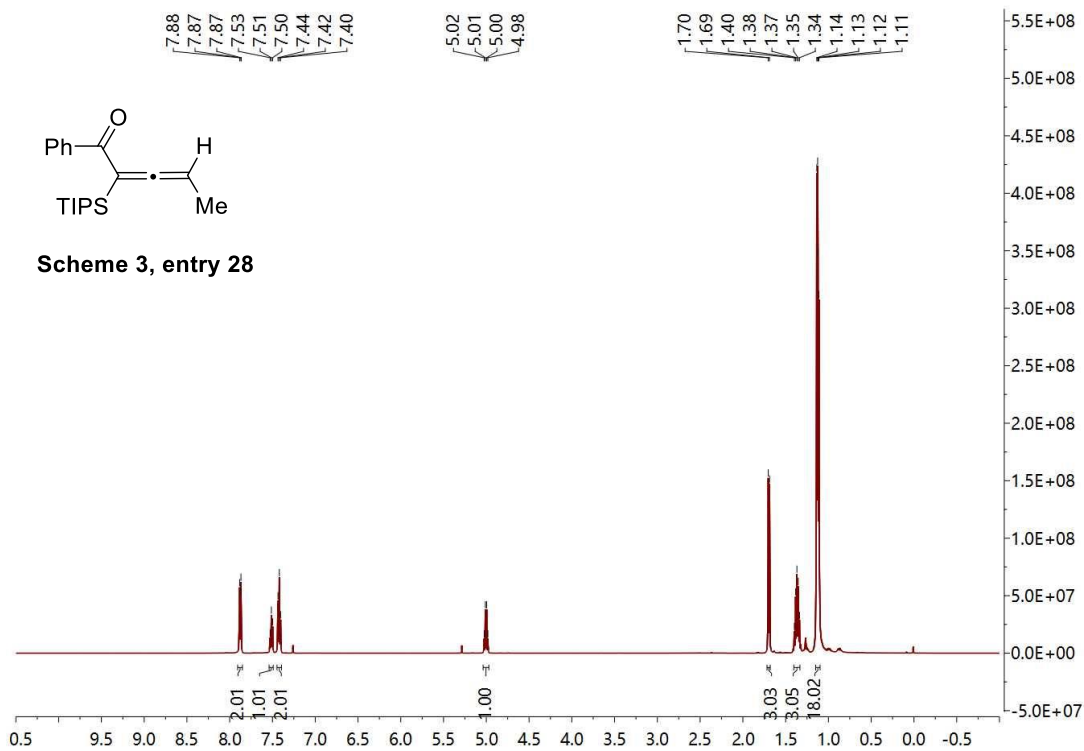

**<sup>13</sup>C NMR (126 MHz, CDCl<sub>3</sub>)**

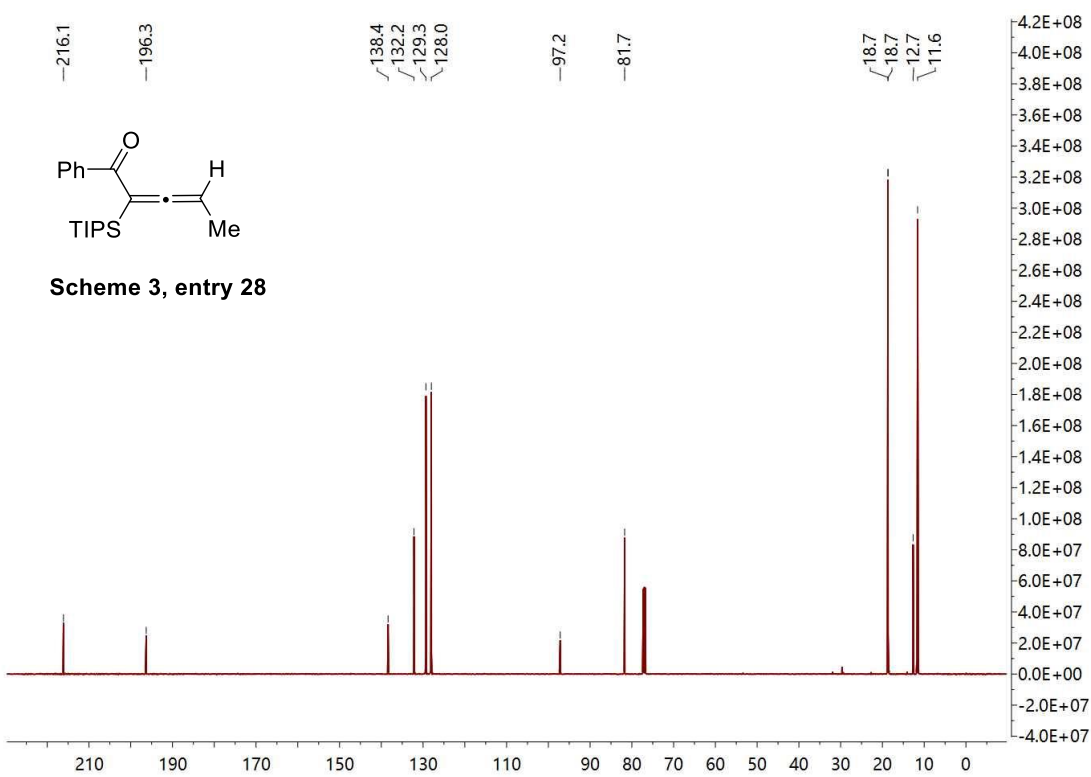

<sup>1</sup>H NMR (500 MHz, CDCl<sub>3</sub>)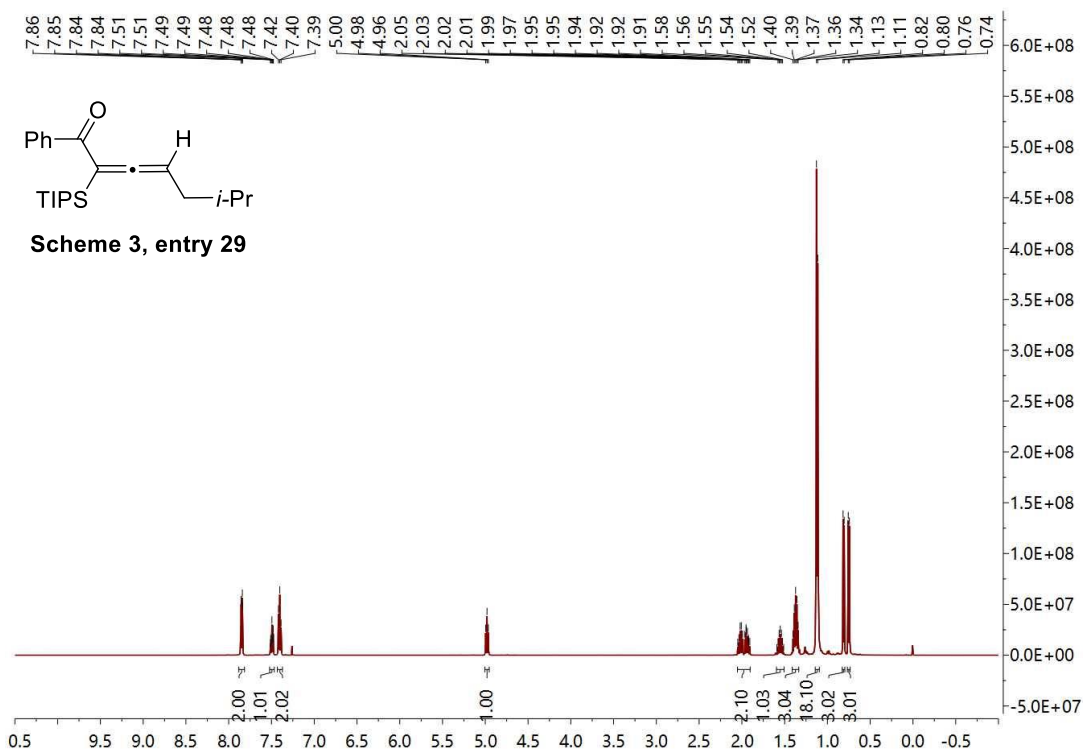

**<sup>13</sup>C NMR (126 MHz, CDCl<sub>3</sub>)**

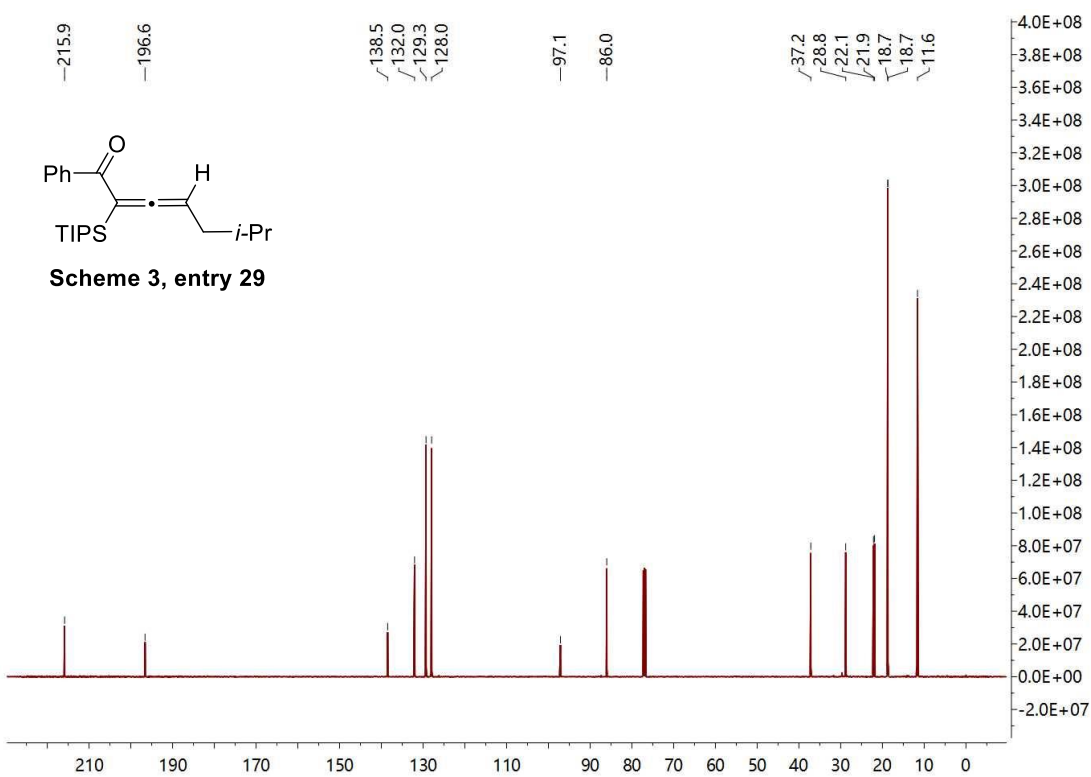

<sup>1</sup>H NMR (500 MHz, CDCl<sub>3</sub>)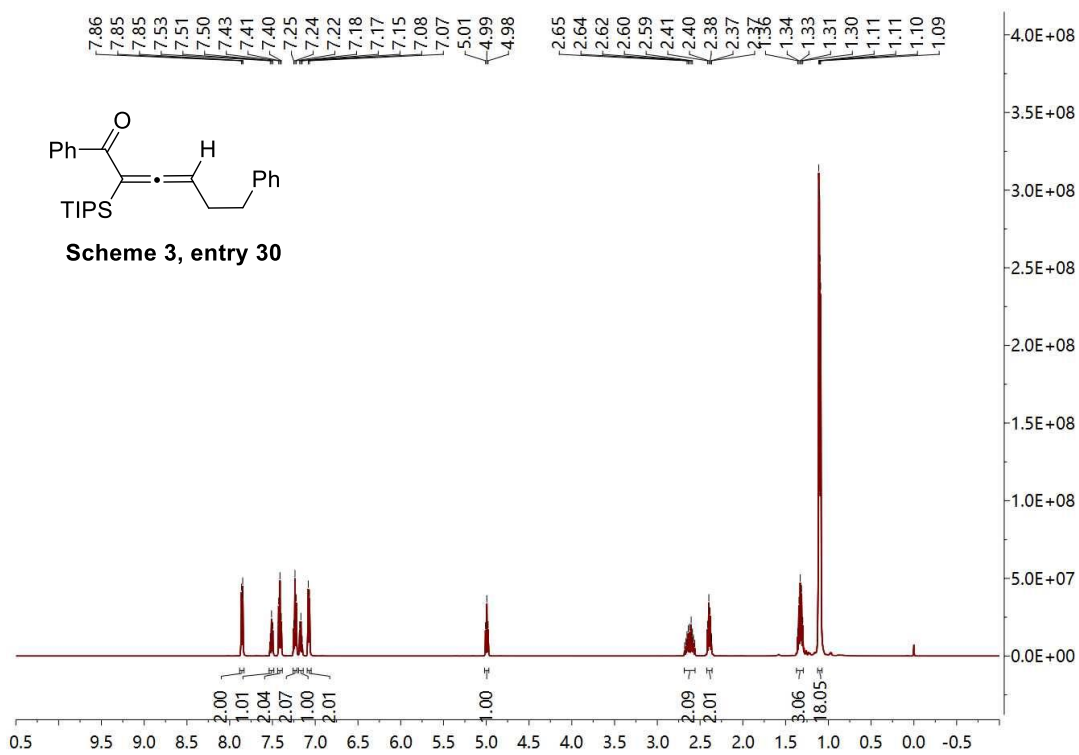

**<sup>13</sup>C NMR (126 MHz, CDCl<sub>3</sub>)**

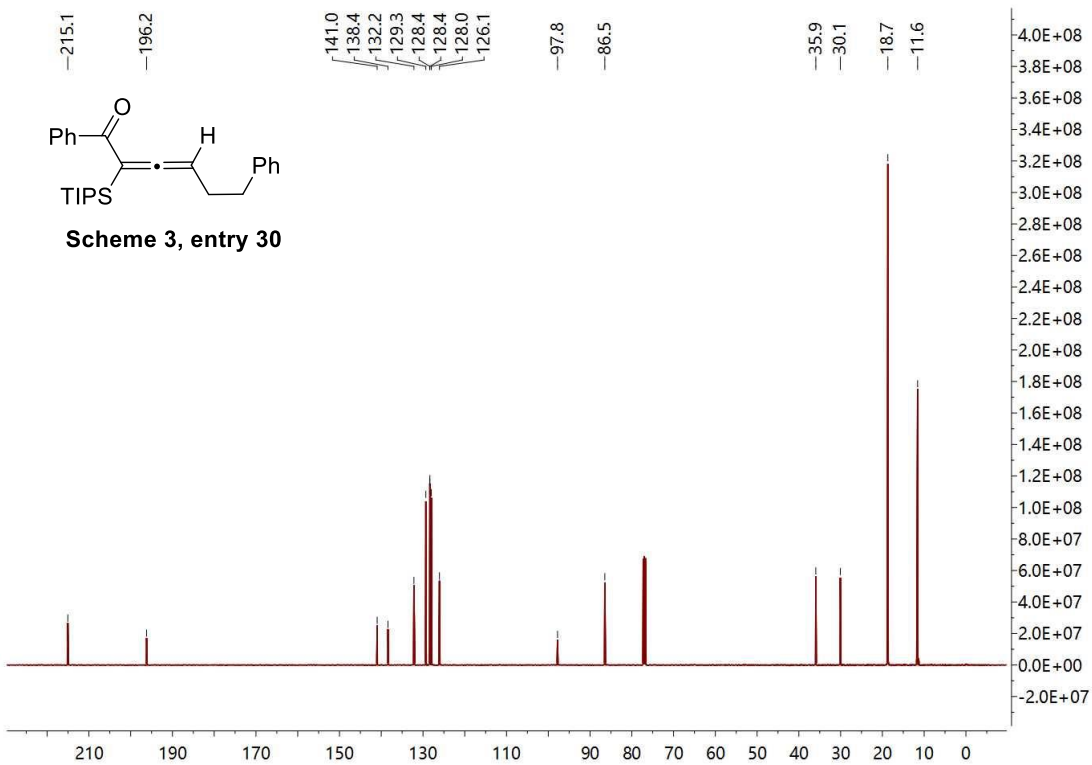

<sup>1</sup>H NMR (500 MHz, CDCl<sub>3</sub>)

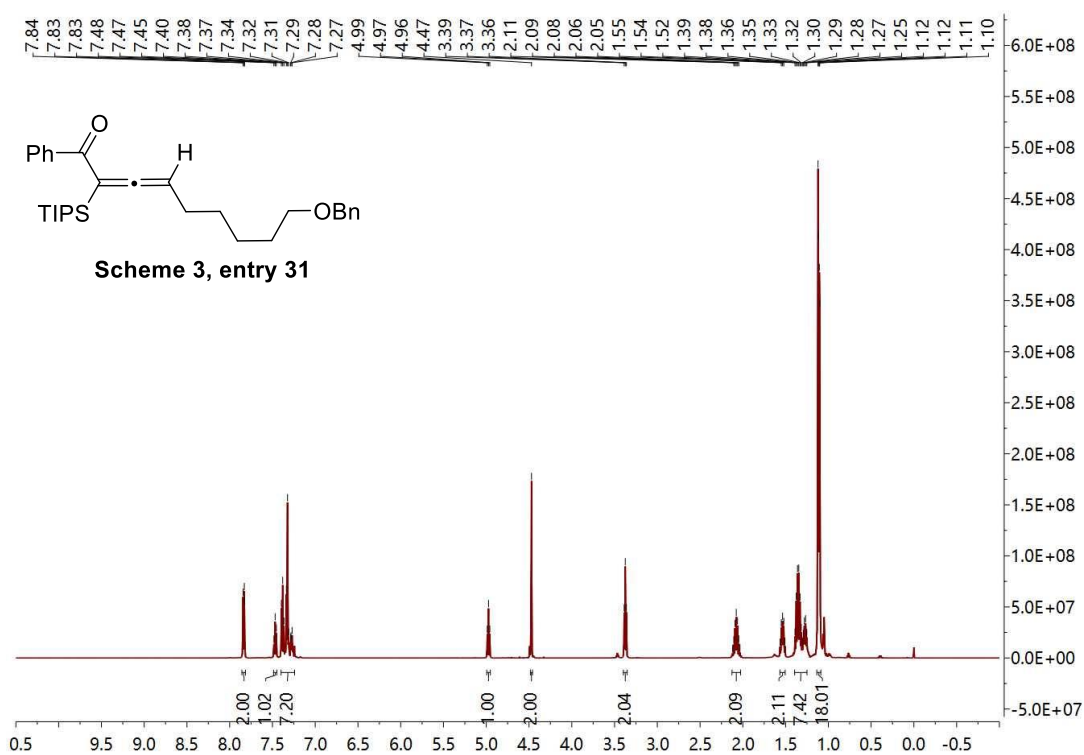

<sup>13</sup>C NMR (126 MHz, CDCl<sub>3</sub>)

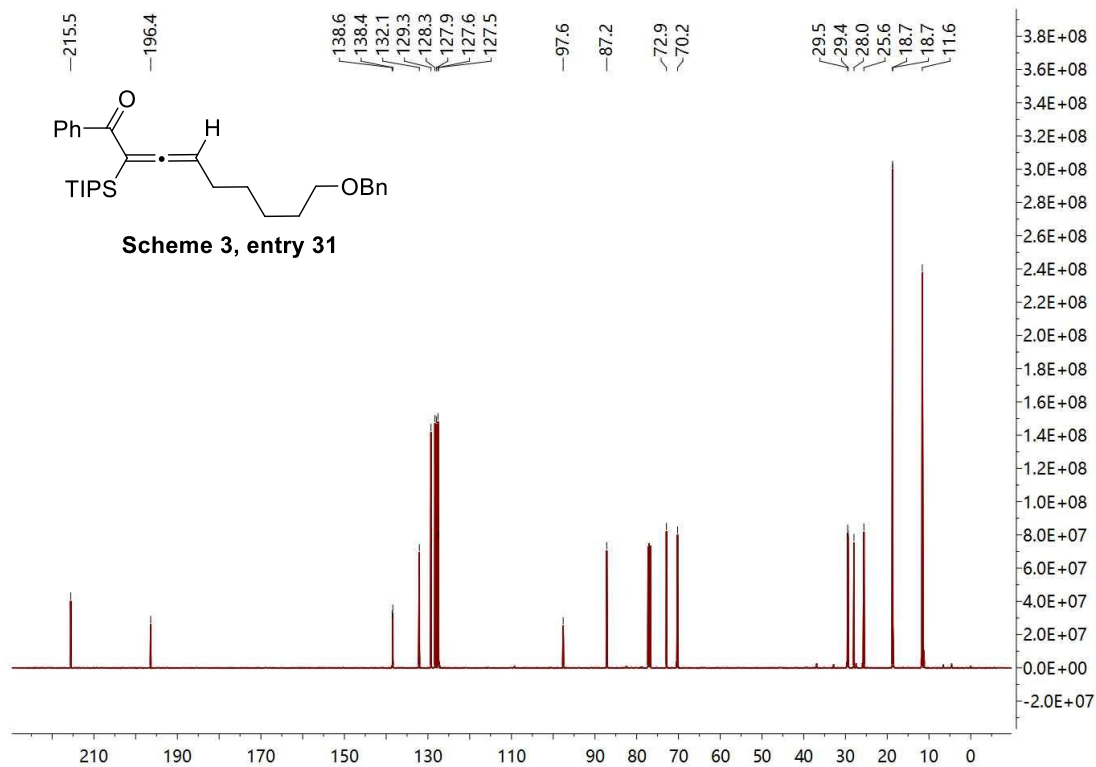



<sup>1</sup>H NMR (500 MHz, CDCl<sub>3</sub>)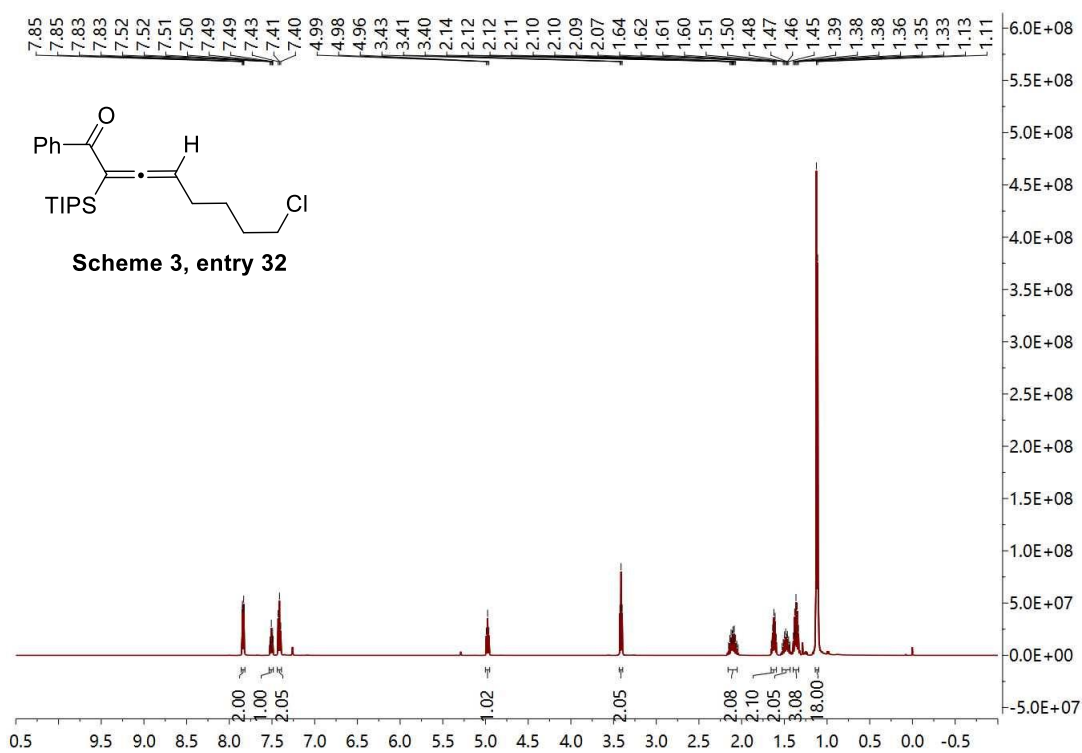

**<sup>13</sup>C NMR (126 MHz, CDCl<sub>3</sub>)**

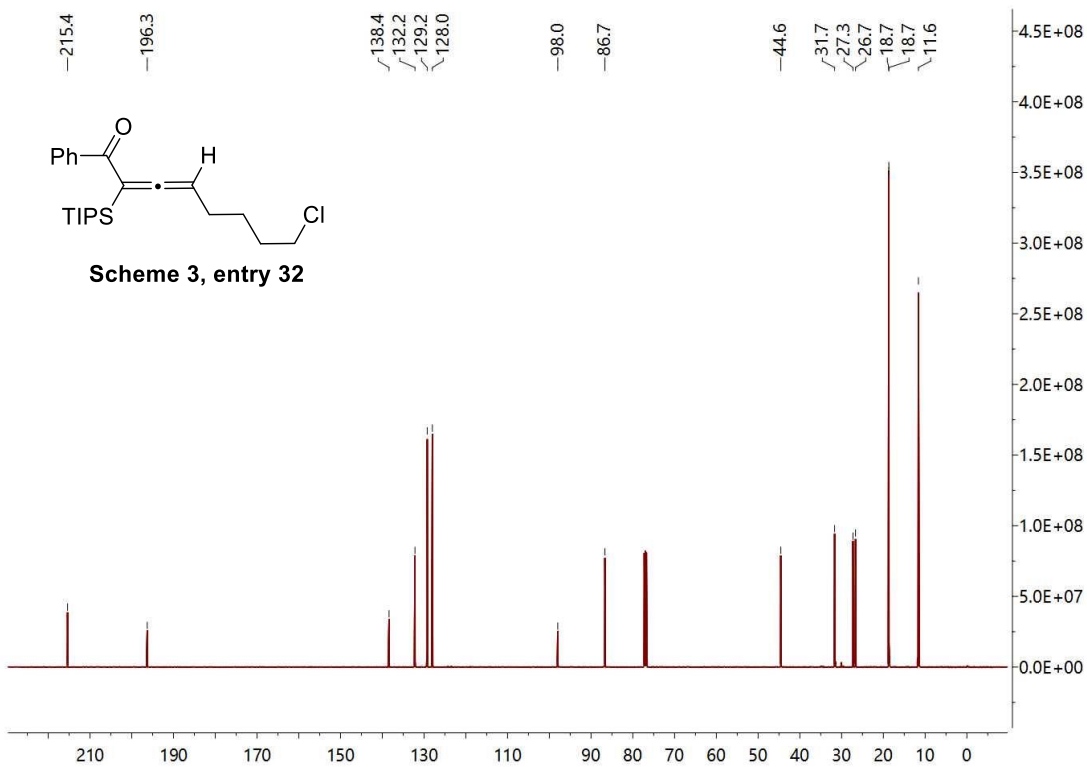

<sup>1</sup>H NMR (500 MHz, CDCl<sub>3</sub>)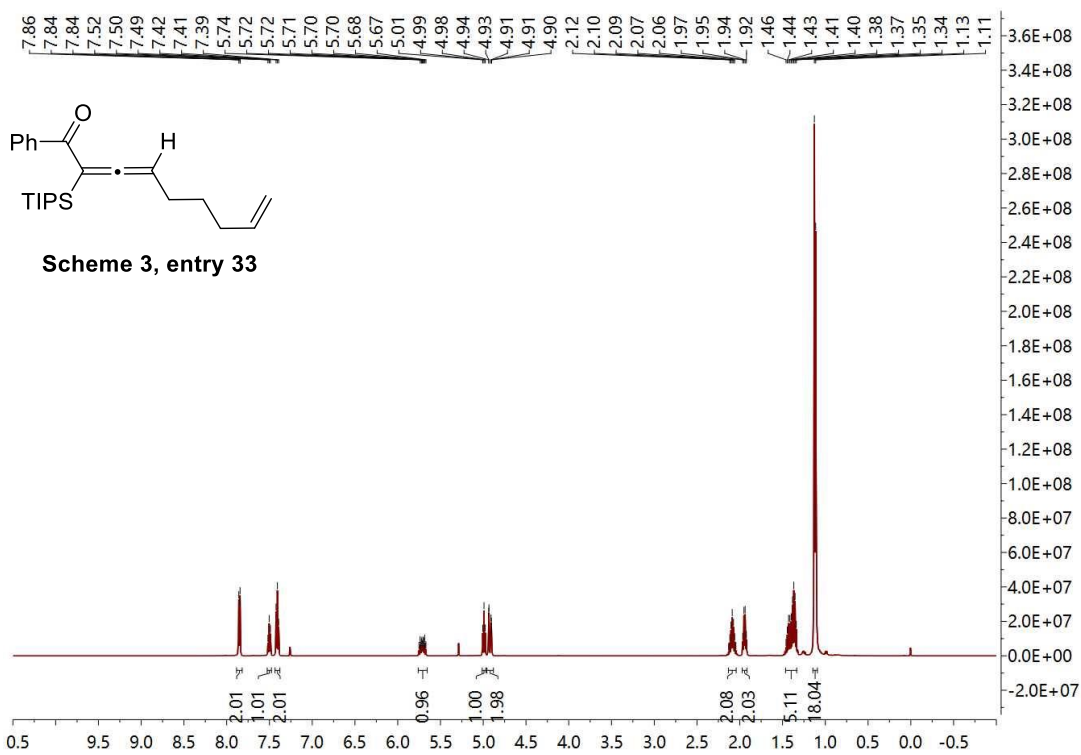

**<sup>13</sup>C NMR (126 MHz, CDCl<sub>3</sub>)**

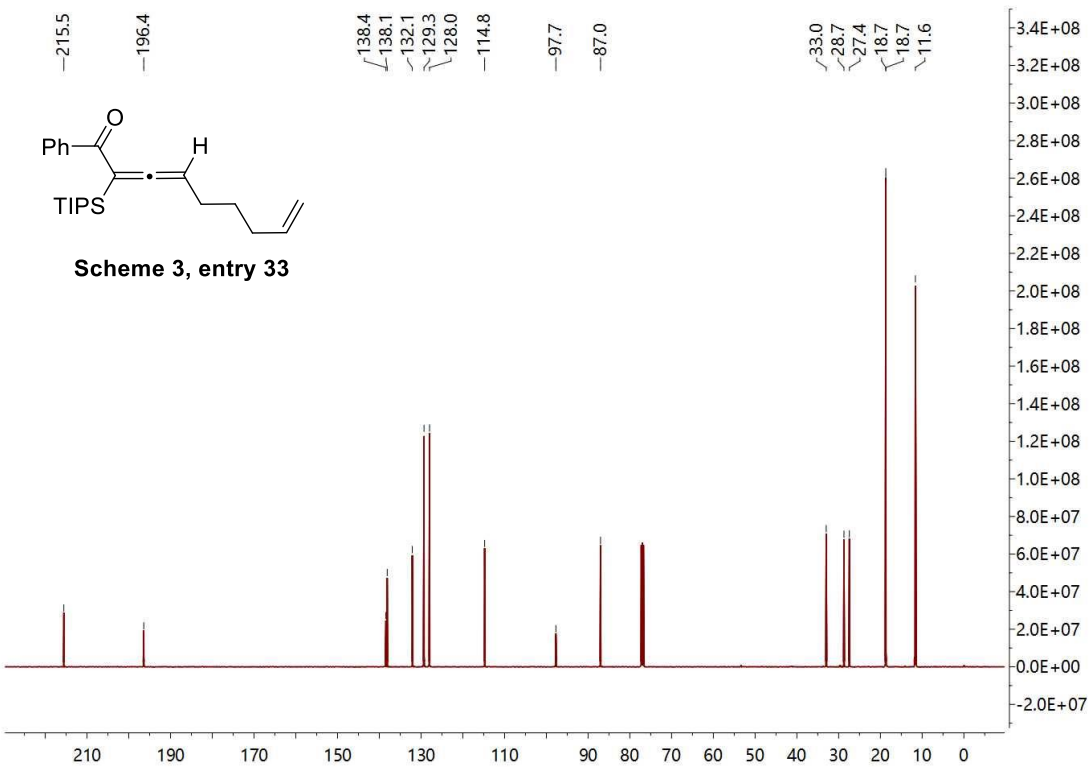

<sup>1</sup>H NMR (500 MHz, CDCl<sub>3</sub>)

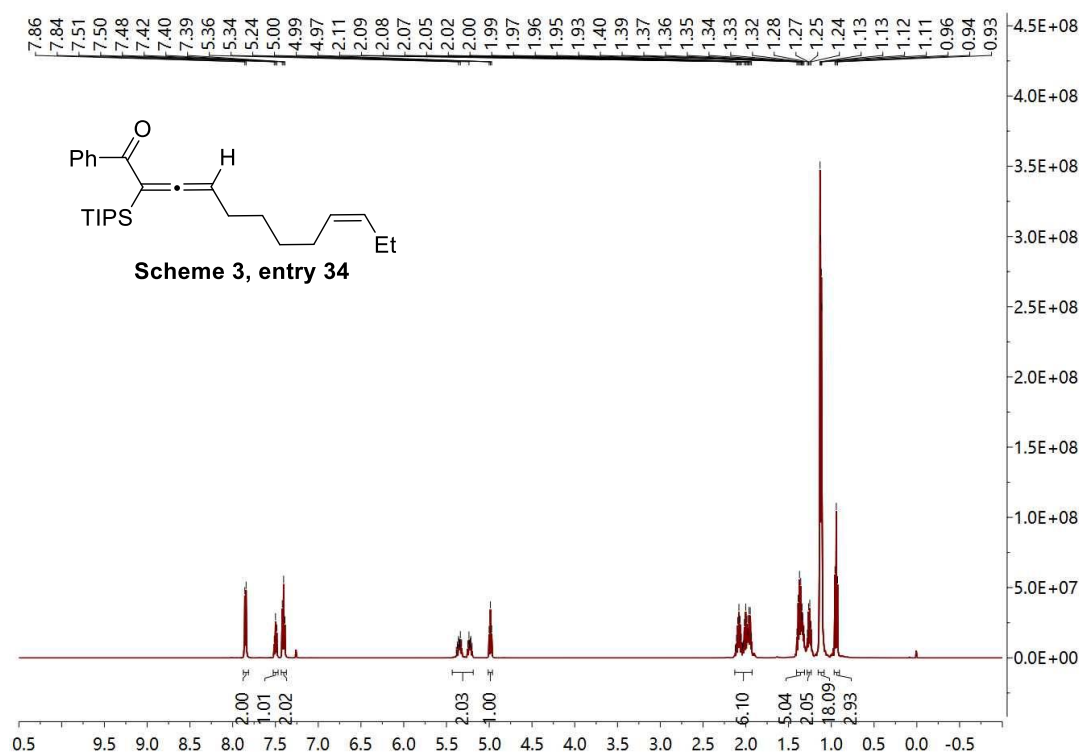

<sup>13</sup>C NMR (126 MHz, CDCl<sub>3</sub>)

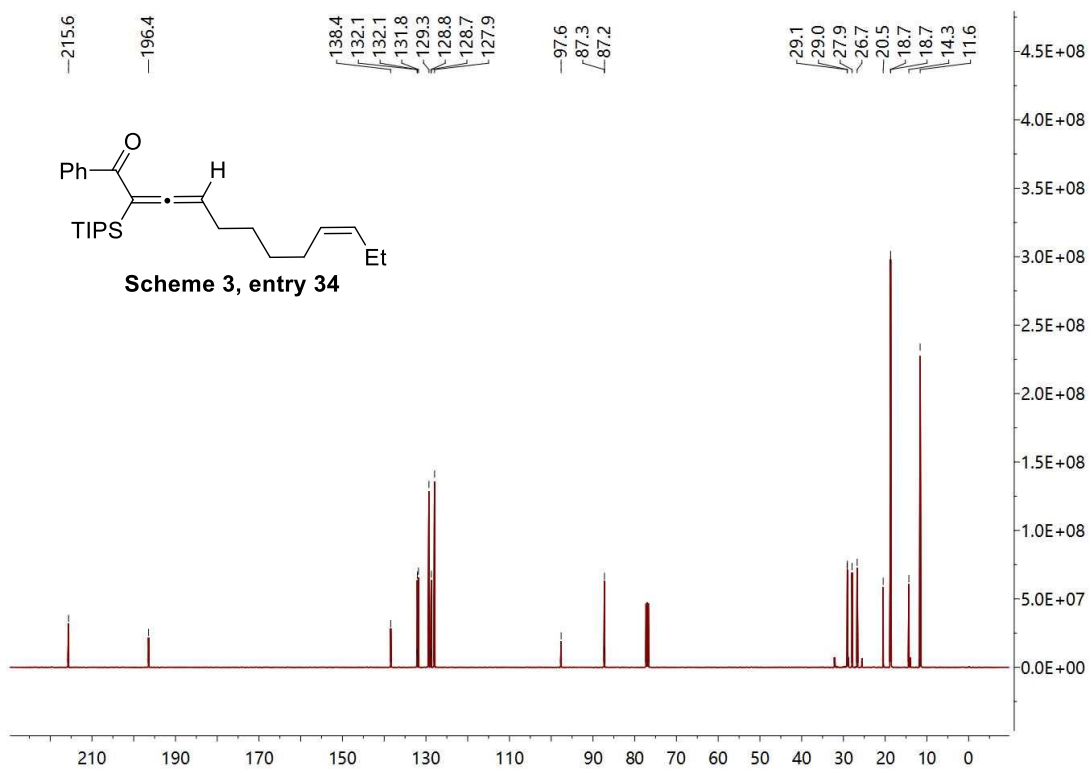

<sup>1</sup>H NMR (500 MHz, CDCl<sub>3</sub>)

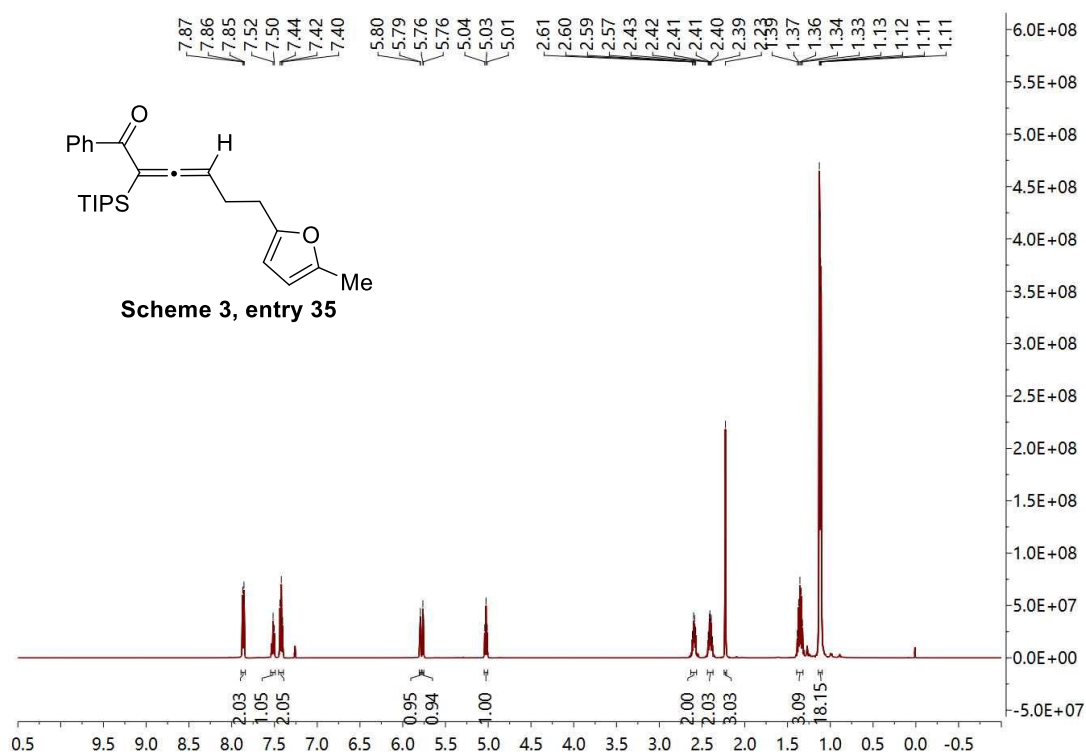

<sup>13</sup>C NMR (126 MHz, CDCl<sub>3</sub>)

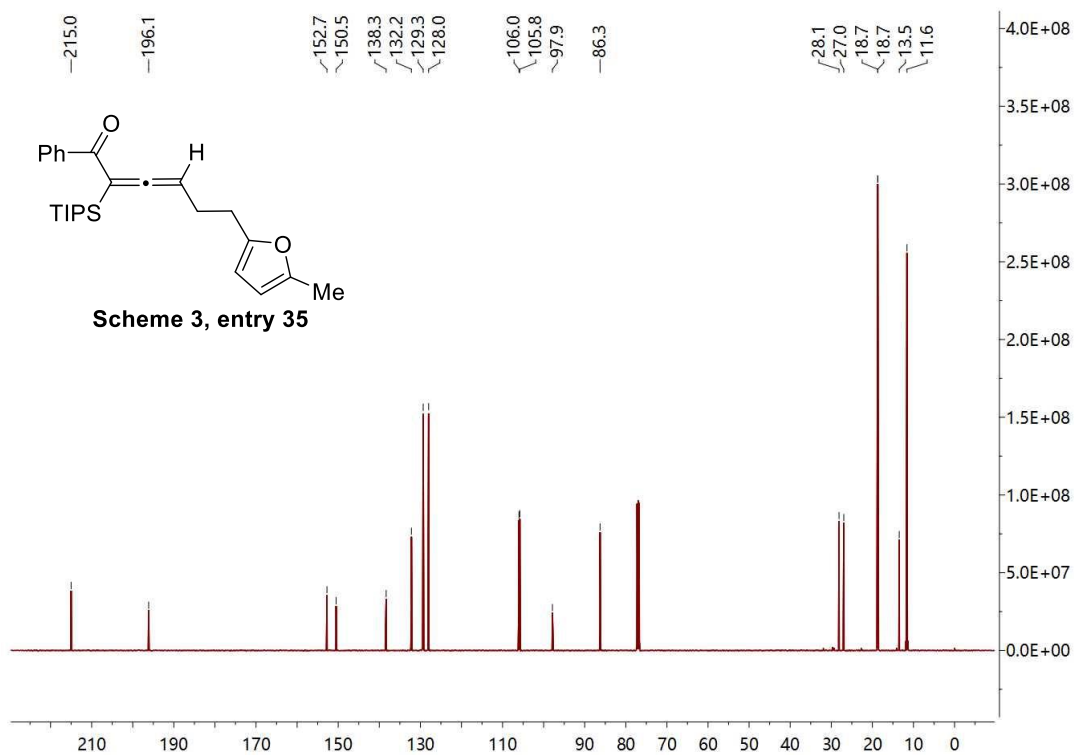

$^1\text{H}$  NMR (500 MHz,  $\text{CDCl}_3$ )

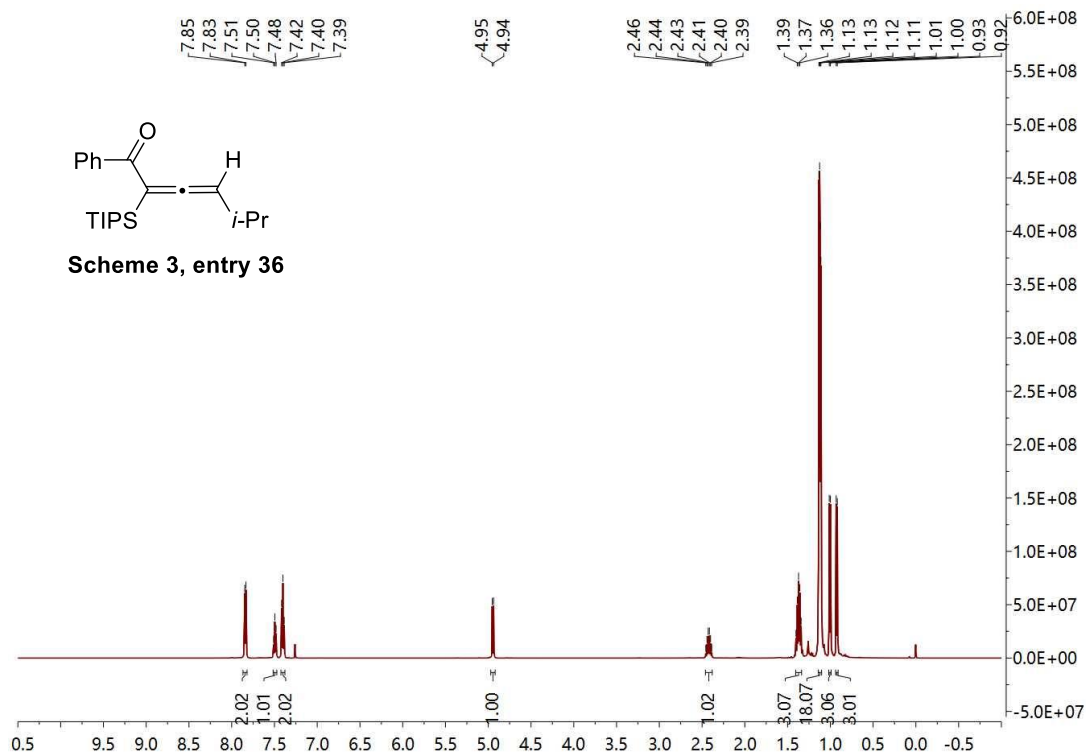

$^{13}\text{C}$  NMR (126 MHz,  $\text{CDCl}_3$ )

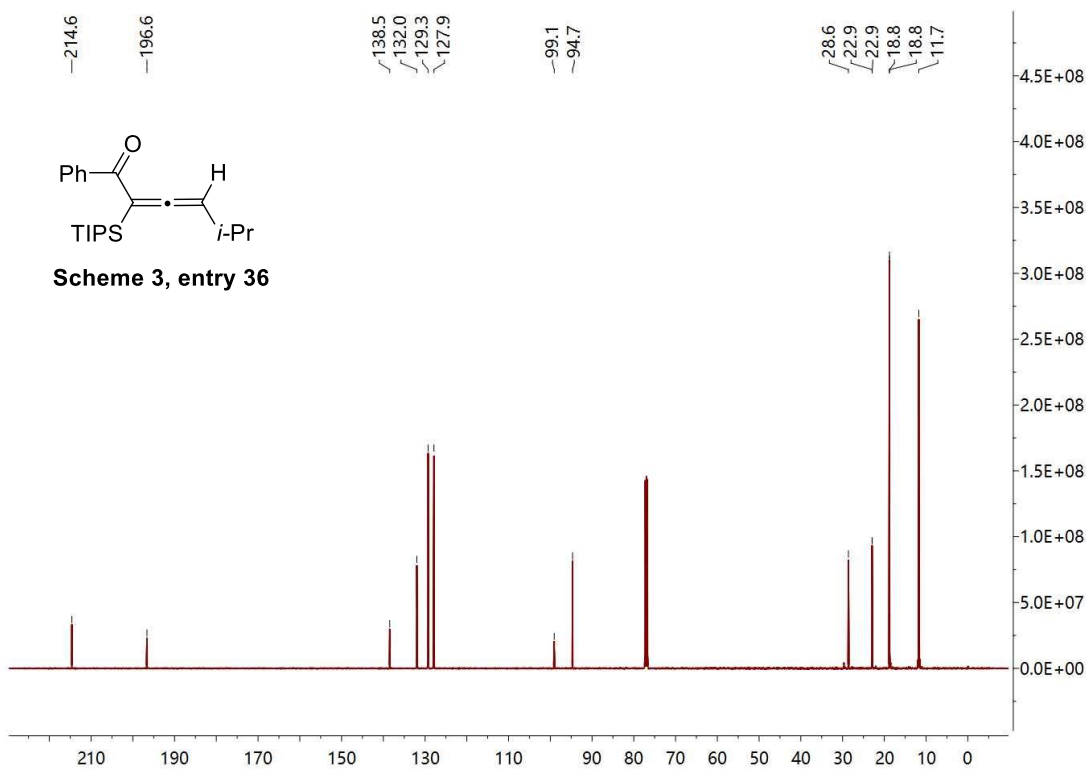

$^1\text{H}$  NMR (500 MHz,  $\text{CDCl}_3$ )

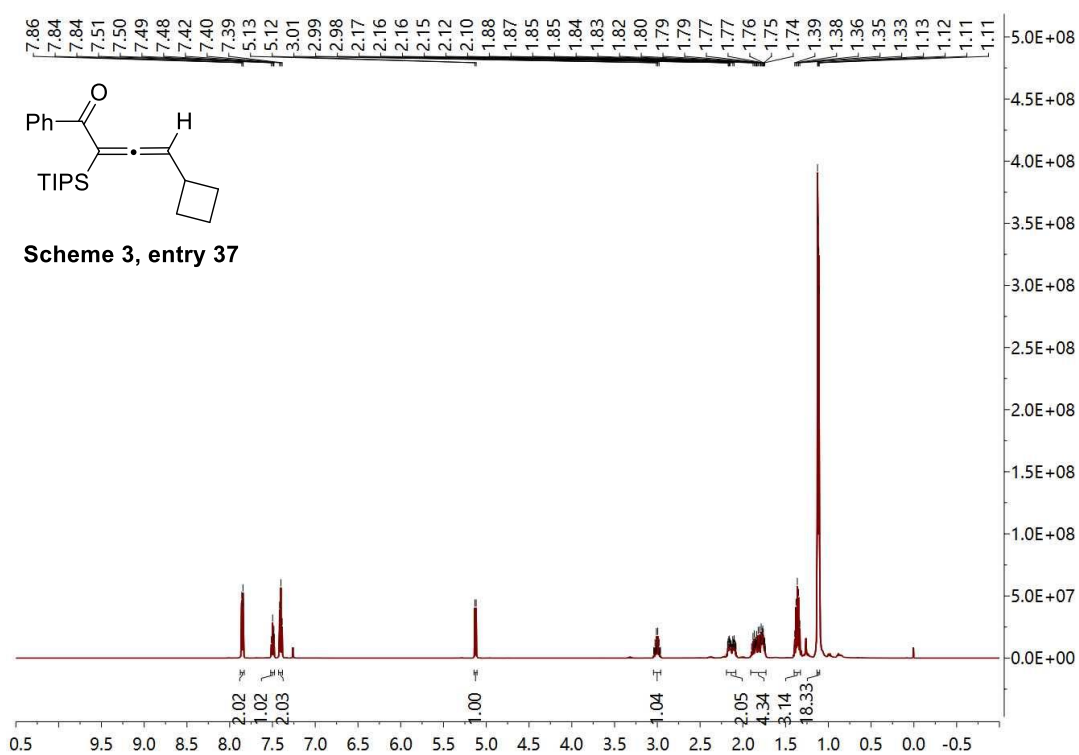

Scheme 3, entry 37

$^{13}\text{C}$  NMR (126 MHz,  $\text{CDCl}_3$ )

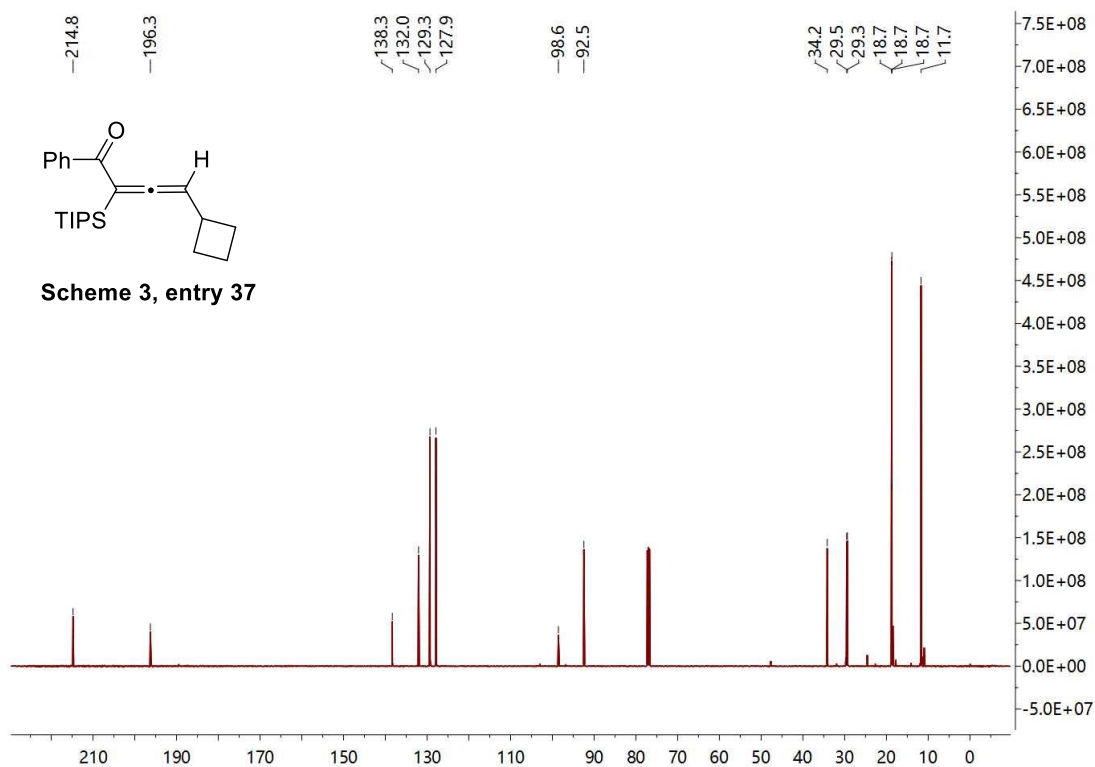

Scheme 3, entry 37

<sup>1</sup>H NMR (500 MHz, CDCl<sub>3</sub>)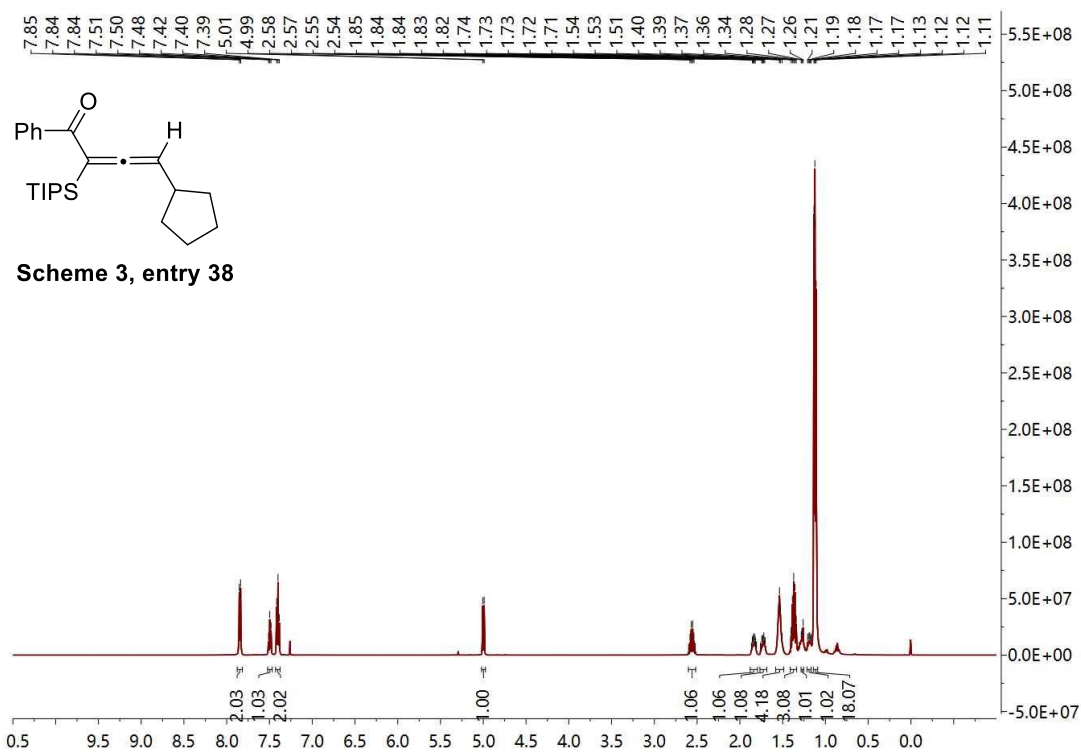

**<sup>13</sup>C NMR (126 MHz, CDCl<sub>3</sub>)**

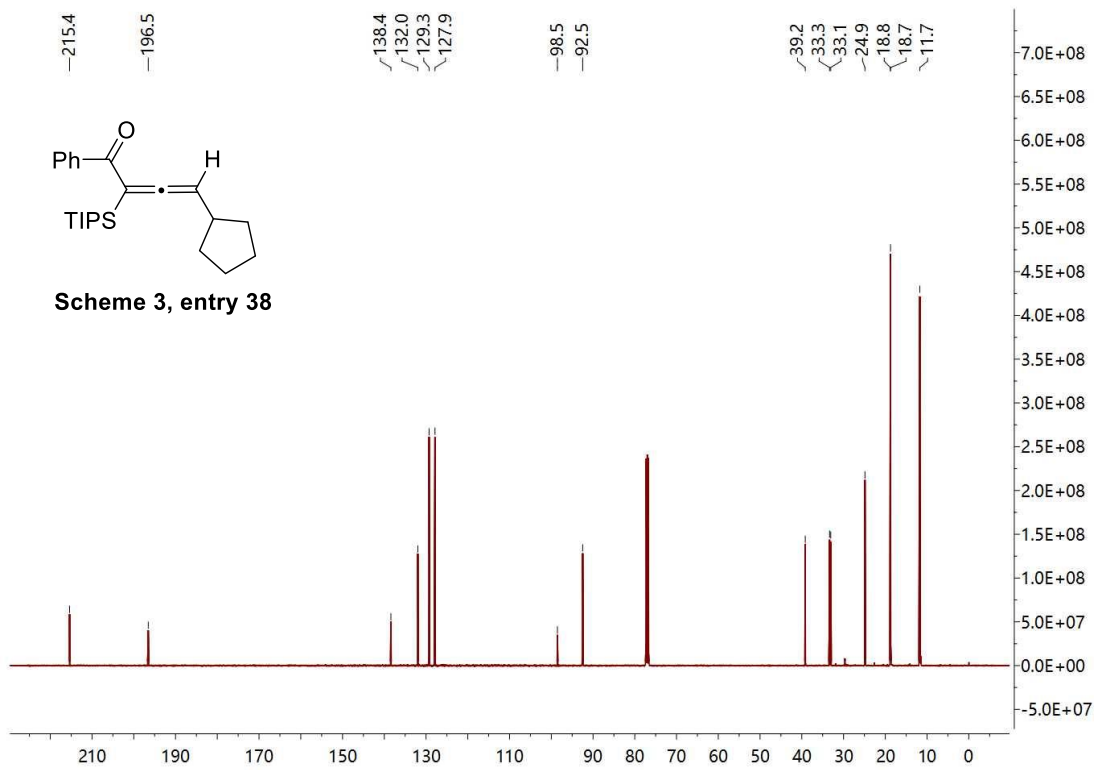

$^1\text{H}$  NMR (500 MHz,  $\text{CDCl}_3$ )

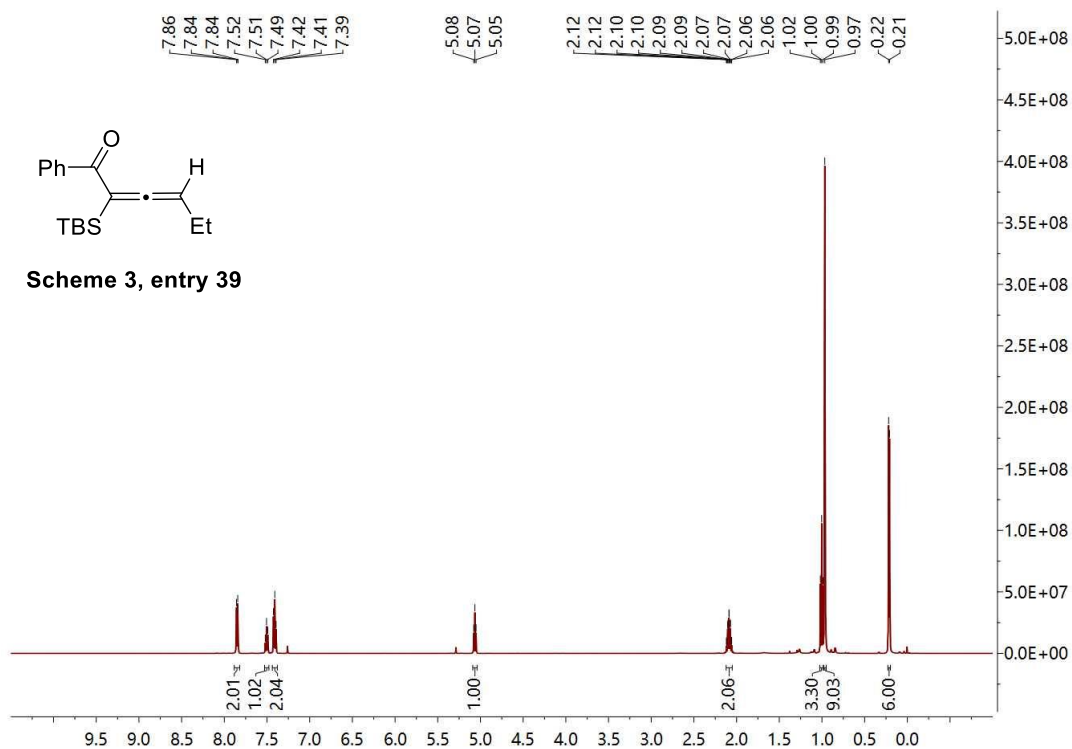

$^{13}\text{C}$  NMR (126 MHz,  $\text{CDCl}_3$ )

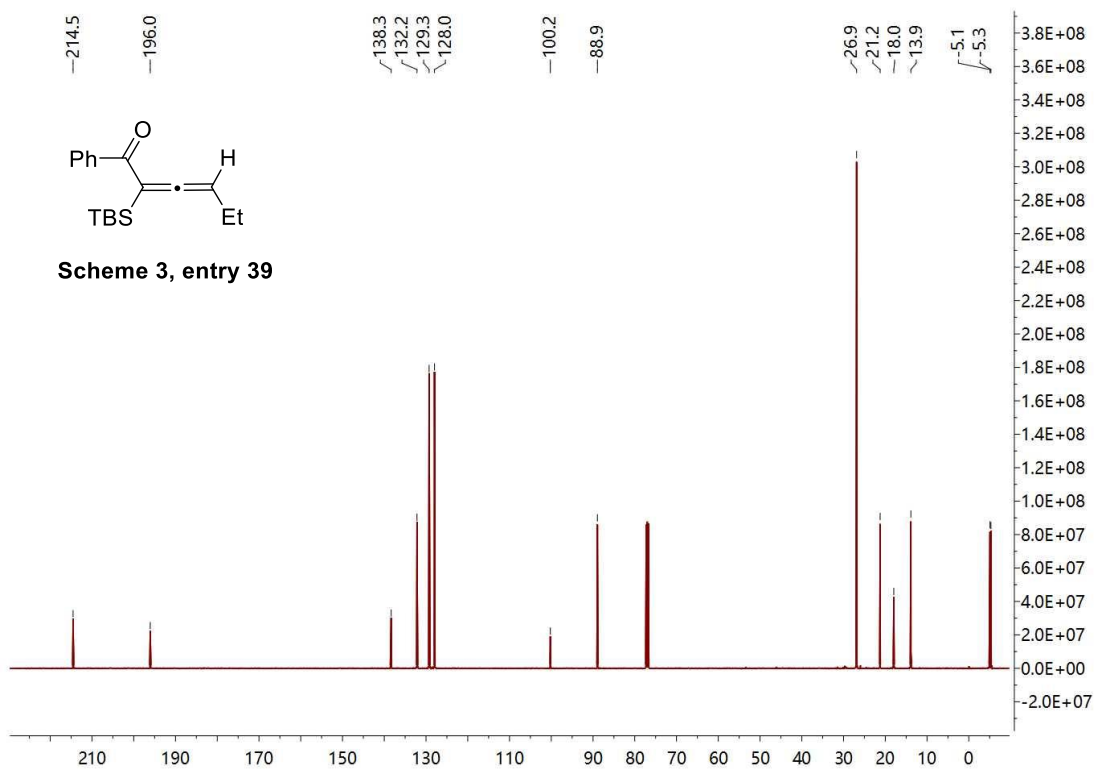



<sup>1</sup>H NMR (500 MHz, CDCl<sub>3</sub>)

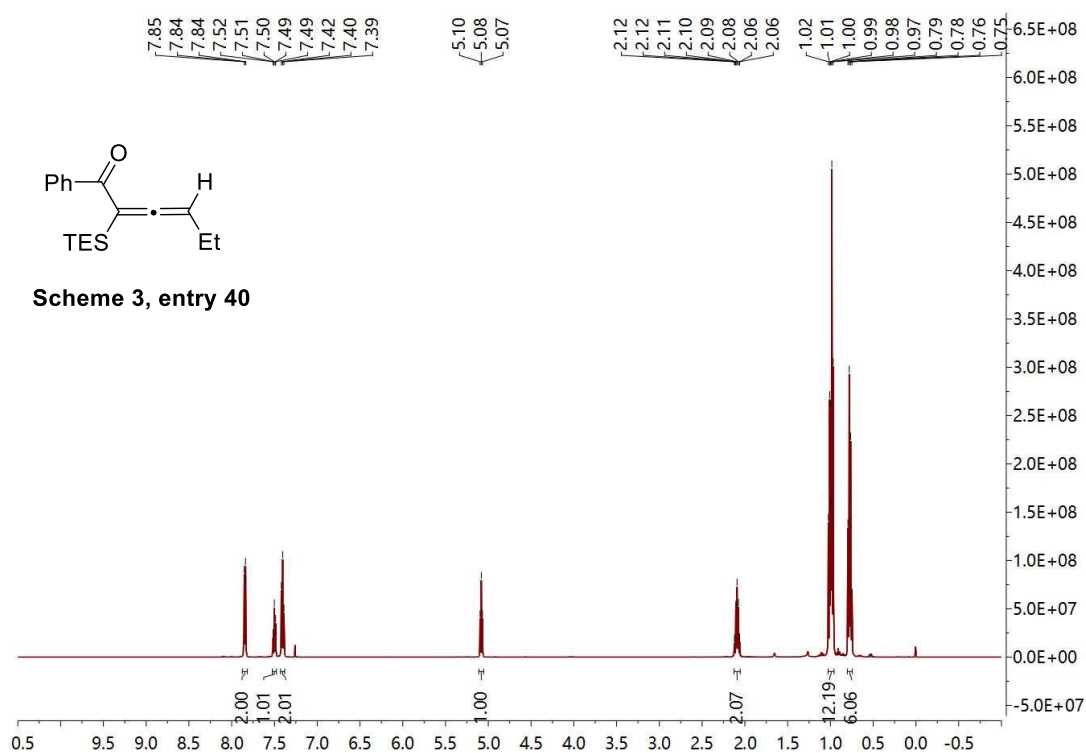

Scheme 3, entry 40

<sup>13</sup>C NMR (126 MHz, CDCl<sub>3</sub>)

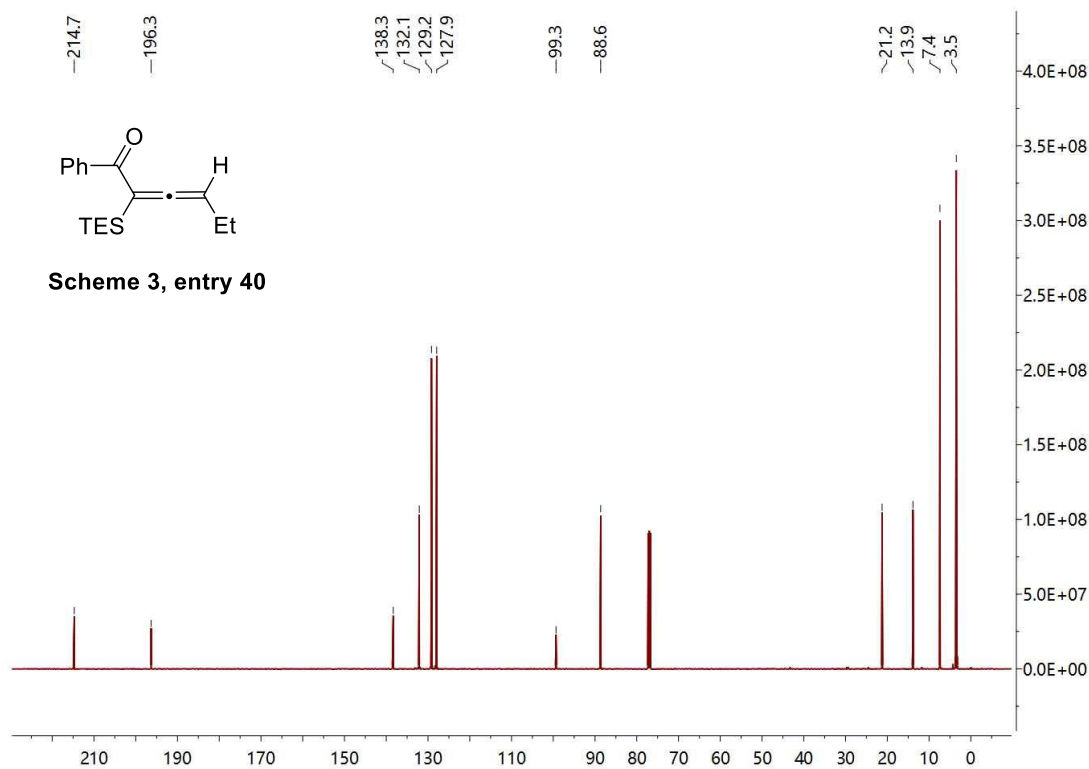

Scheme 3, entry 40

<sup>1</sup>H NMR (500 MHz, CDCl<sub>3</sub>)

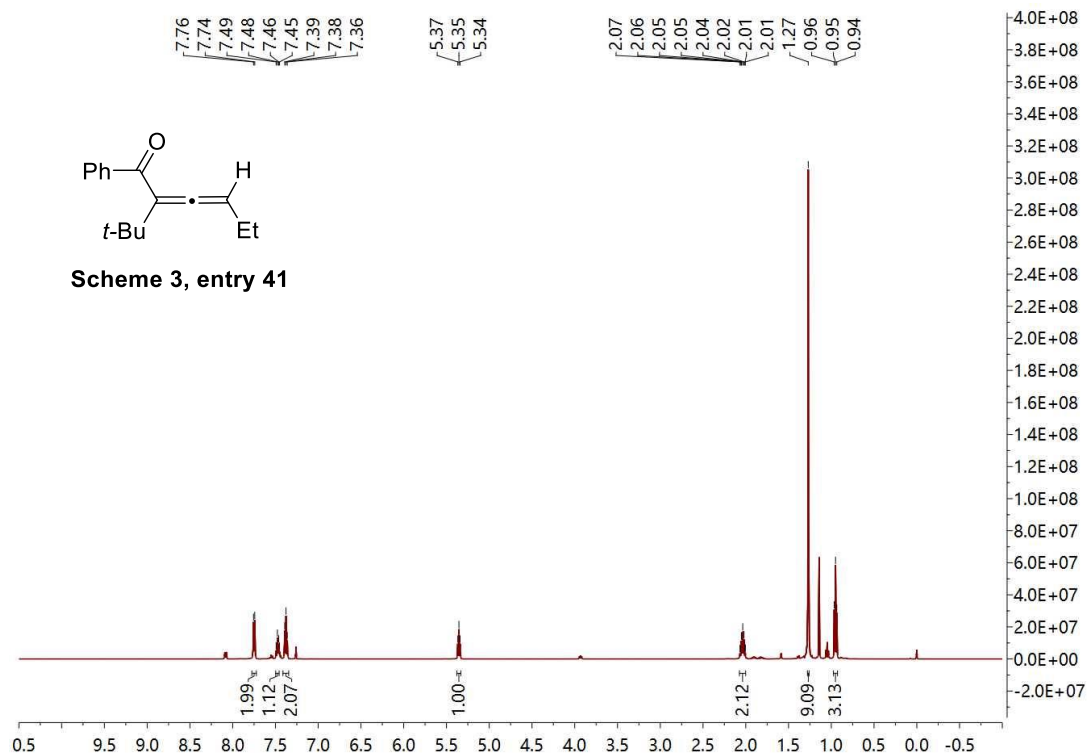

<sup>13</sup>C NMR (126 MHz, CDCl<sub>3</sub>)

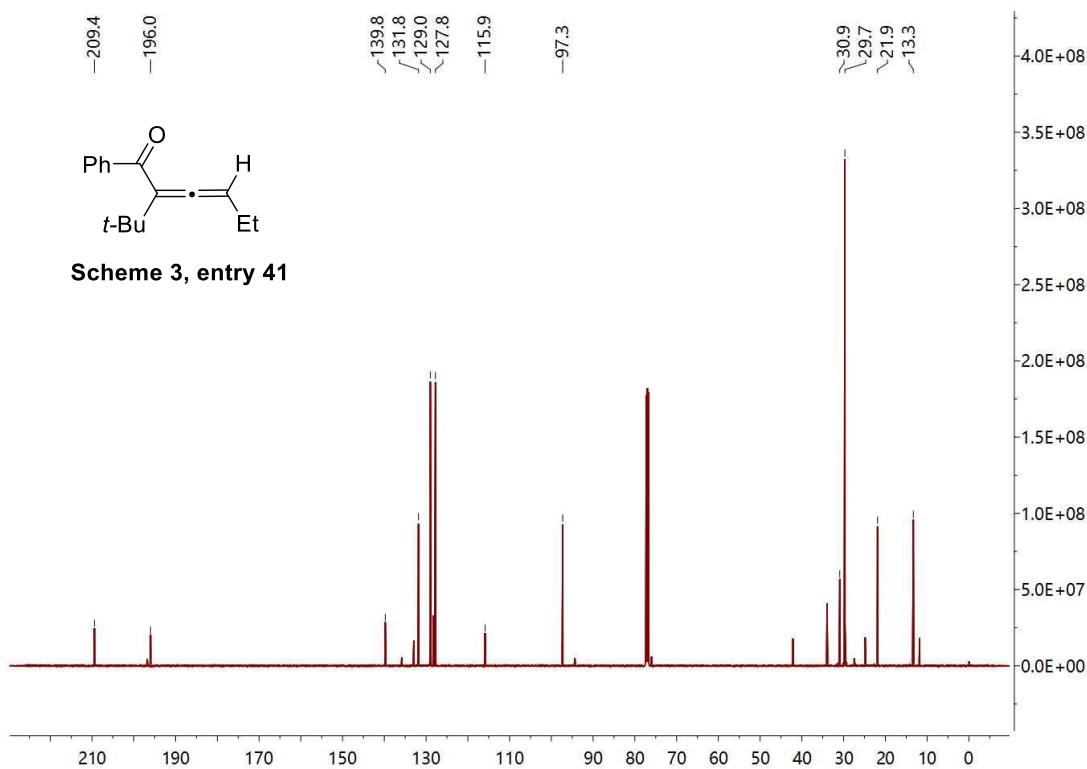

$^1\text{H}$  NMR (500 MHz,  $\text{CDCl}_3$ )

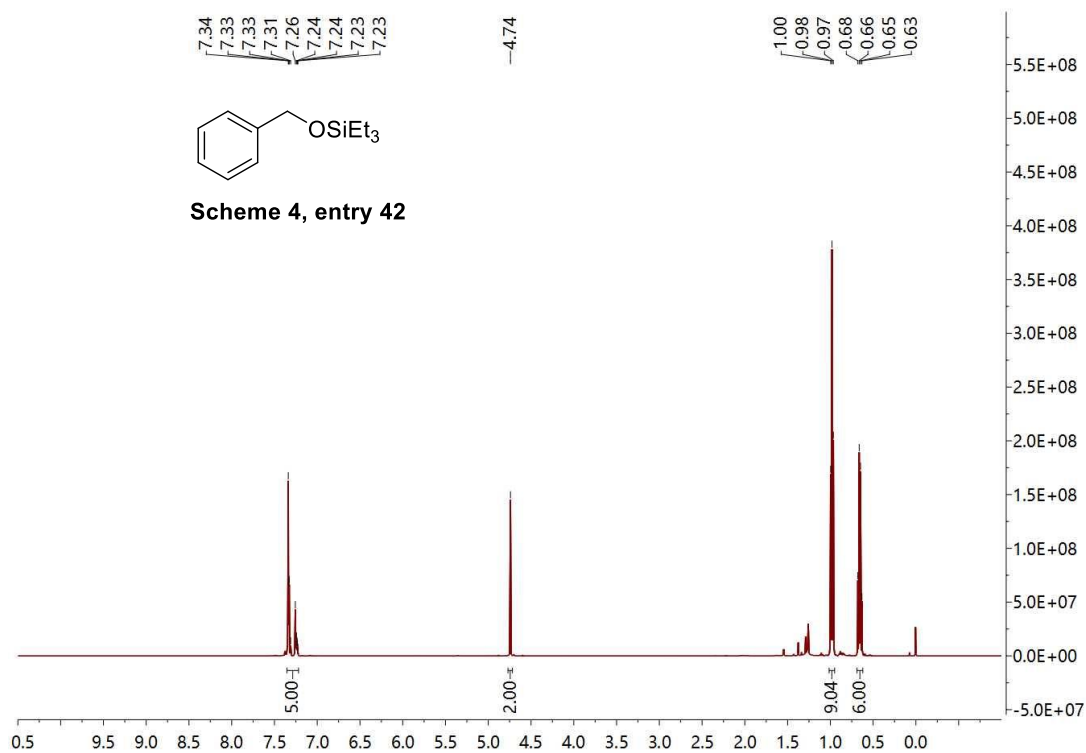

$^{13}\text{C}$  NMR (126 MHz,  $\text{CDCl}_3$ )

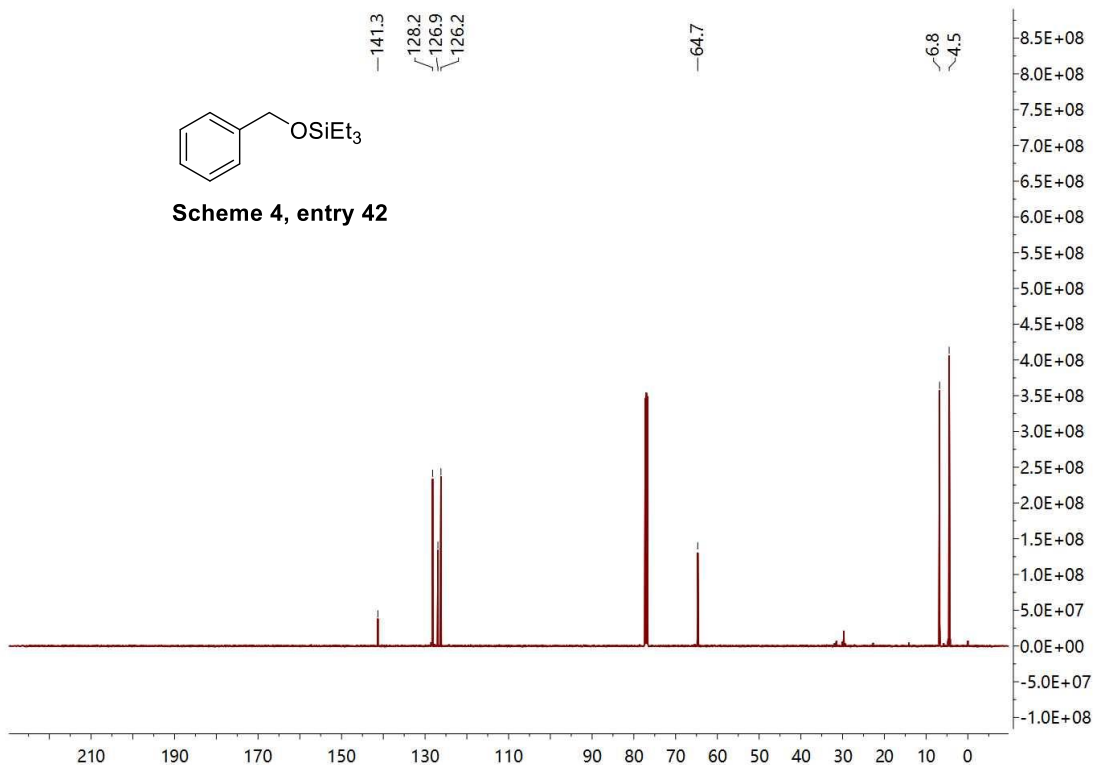

$^1\text{H}$  NMR (500 MHz,  $\text{CDCl}_3$ )

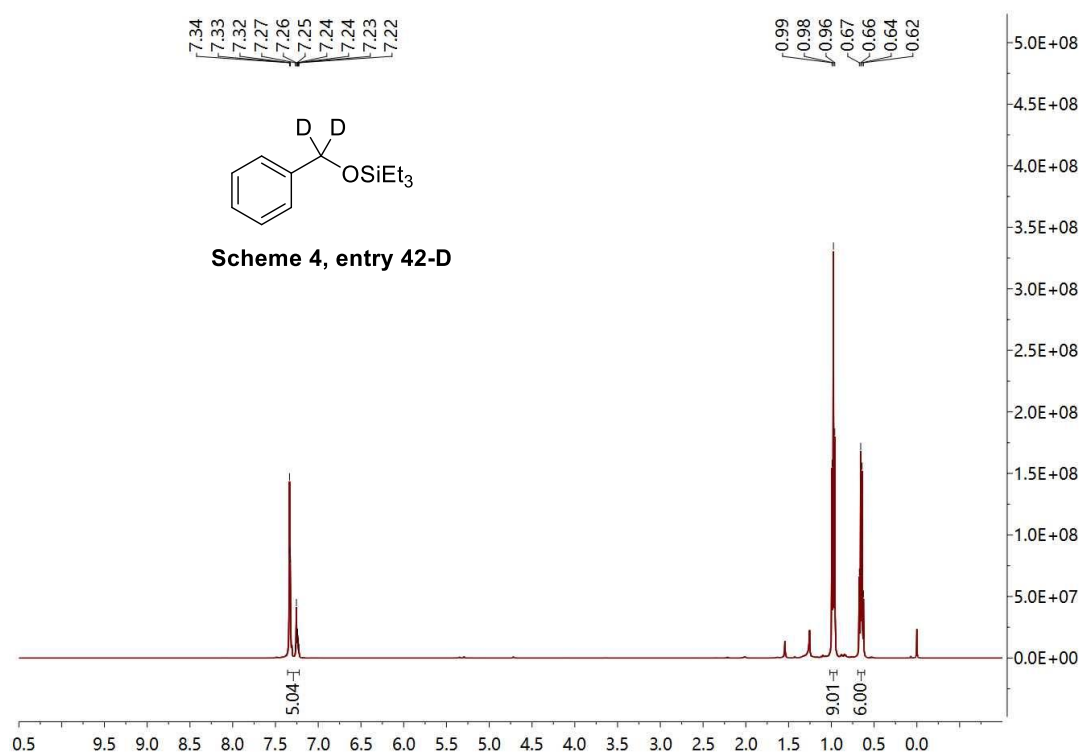

$^{13}\text{C}$  NMR (126 MHz,  $\text{CDCl}_3$ )

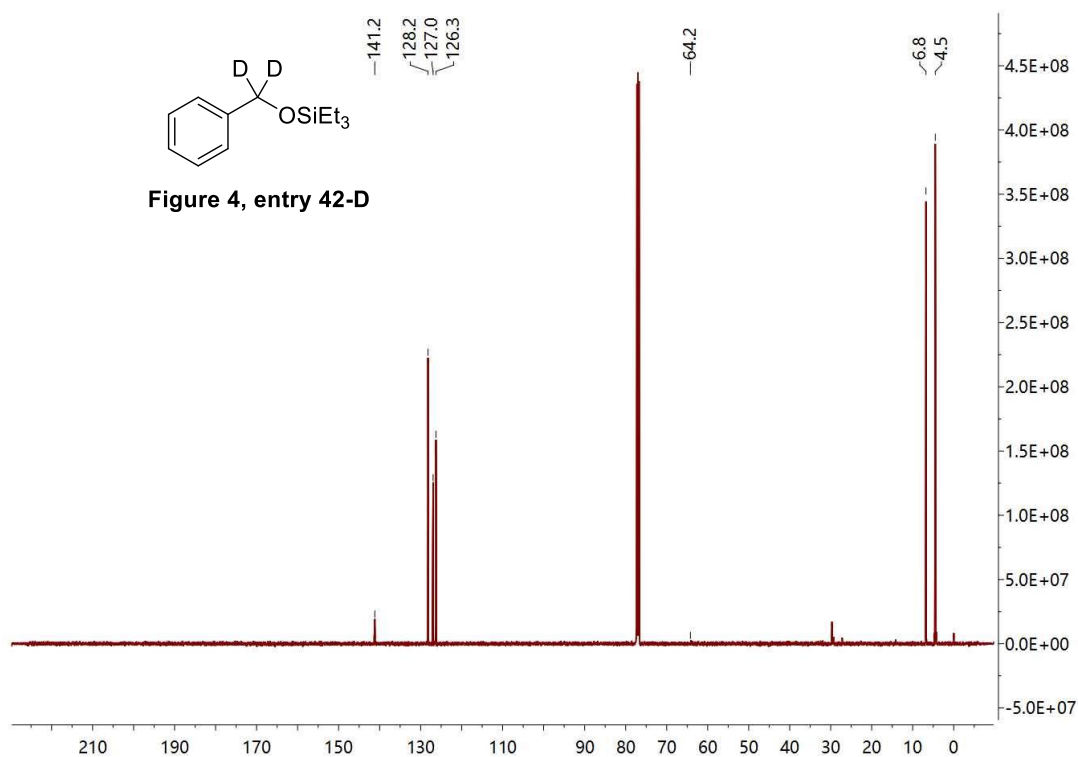

## IX. Stereoselectivity Analysis

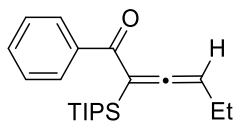

**Scheme 2, entry 1**  
(*R,S*)-L1: 92% ee; (*S,R*)-L1: 92% ee

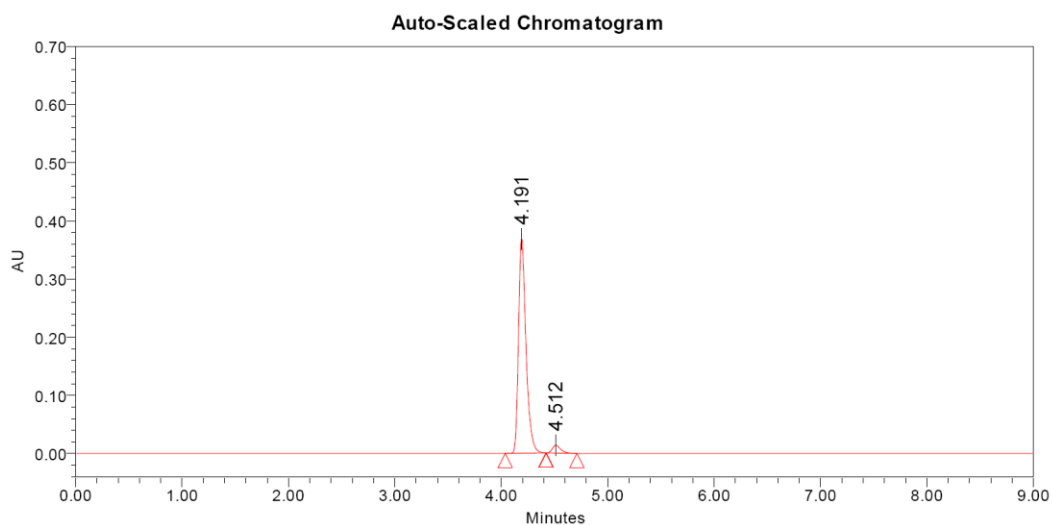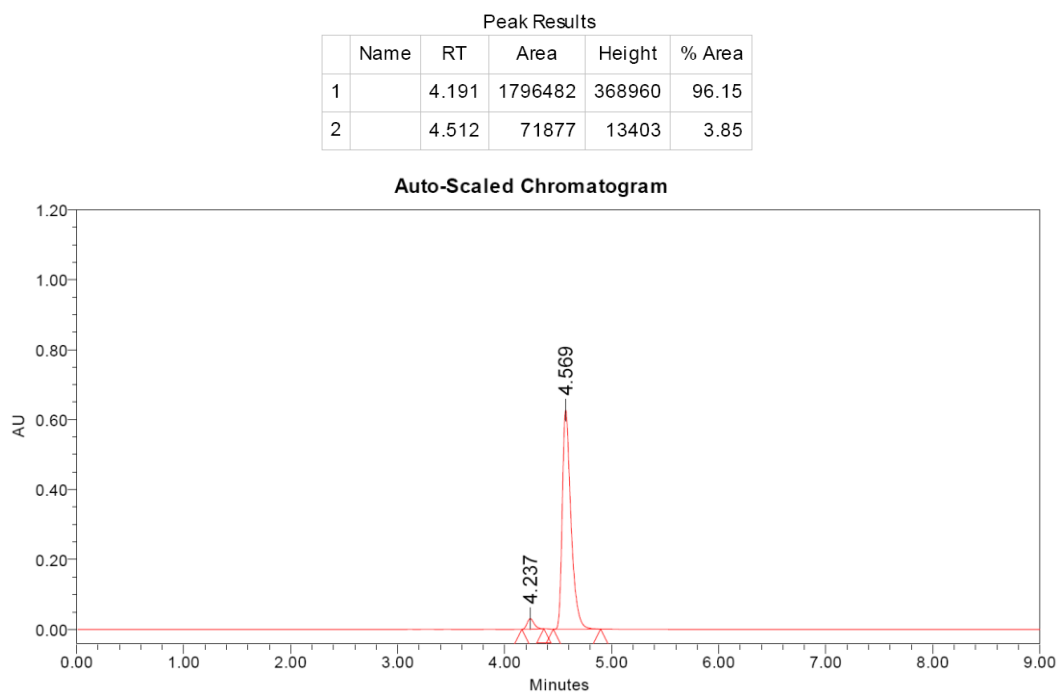

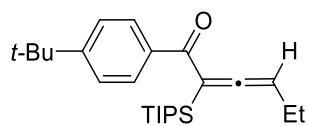

**Scheme 2, entry 2**  
*(R,S)*-L1: 90% ee; *(S,R)*-L1: 90% ee

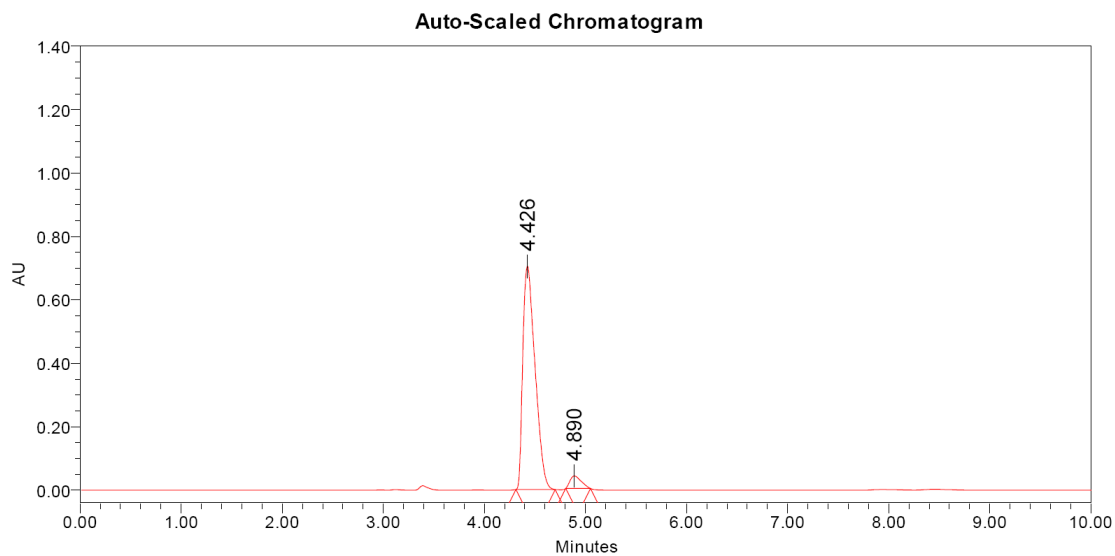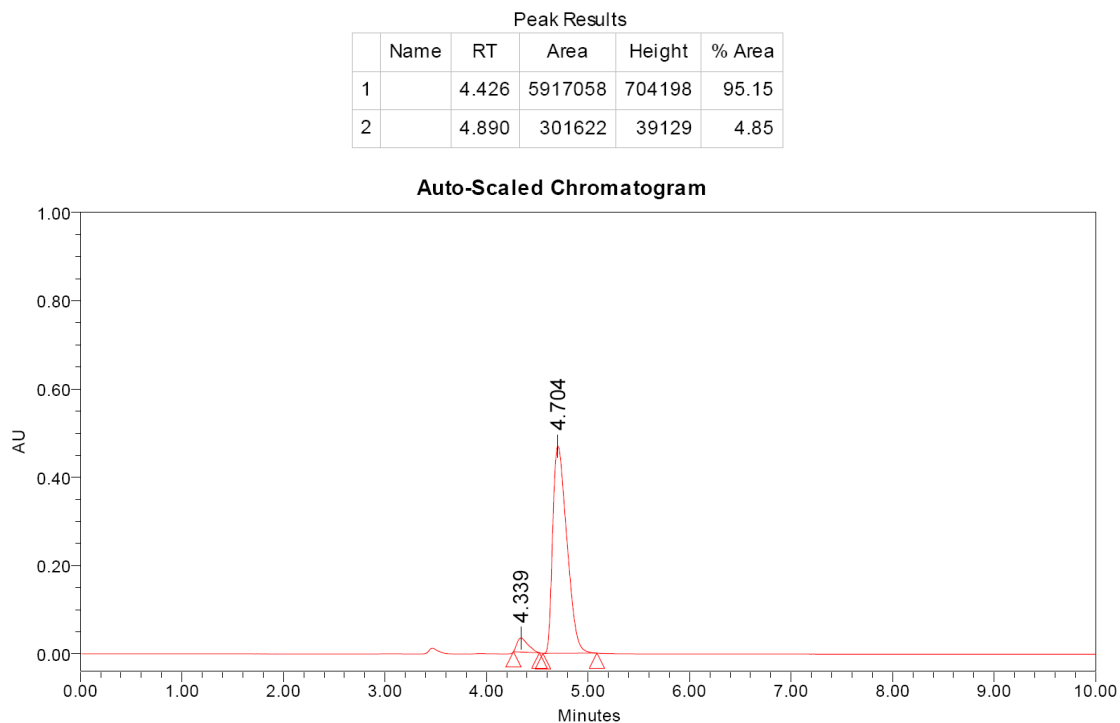

Peak Results

|   | Name | RT    | Area    | Height | % Area |
|---|------|-------|---------|--------|--------|
| 1 |      | 4.339 | 236757  | 31530  | 4.95   |
| 2 |      | 4.704 | 4543441 | 469727 | 95.05  |

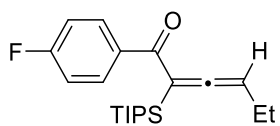

**Scheme 2, entry 3**  
 (R,S)-L1: 93% ee; (S,R)-L1: 93% ee

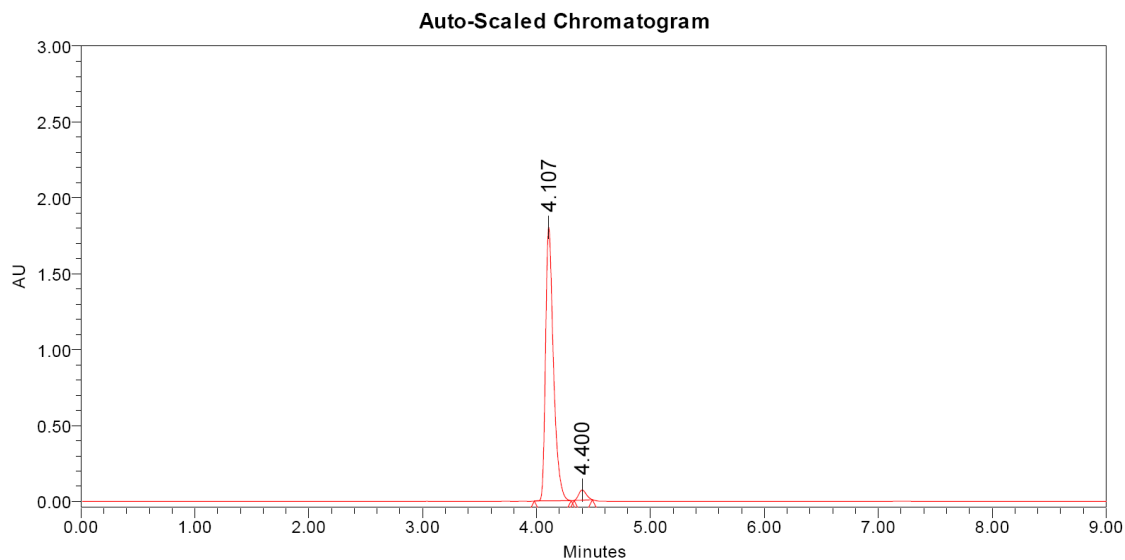

Peak Results

|   | Name | RT    | Area    | Height  | % Area |
|---|------|-------|---------|---------|--------|
| 1 |      | 4.107 | 8671829 | 1803111 | 96.61  |
| 2 |      | 4.400 | 304472  | 66695   | 3.39   |

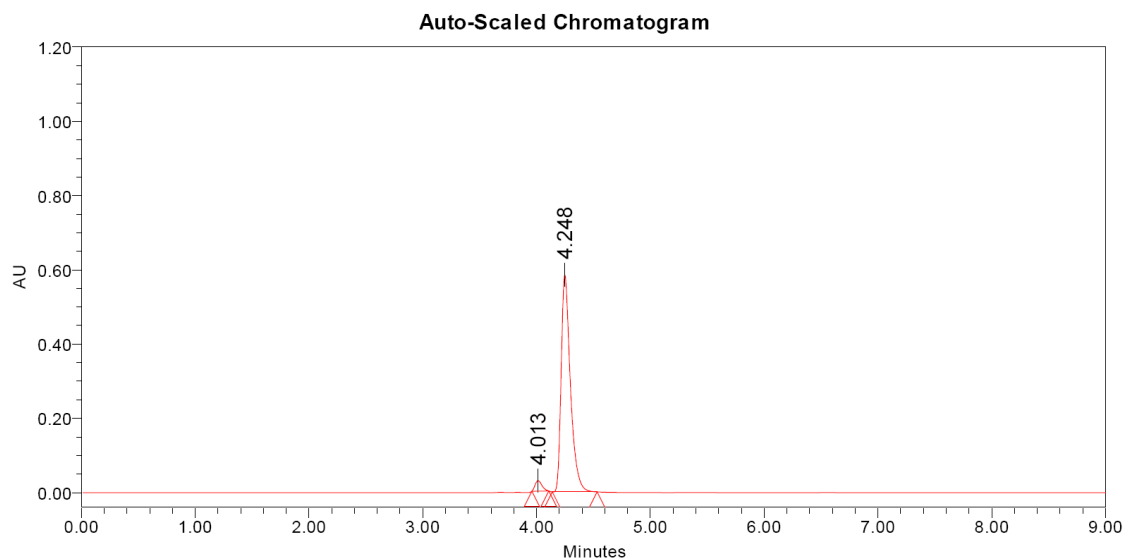

Peak Results

|   | Name | RT    | Area    | Height | % Area |
|---|------|-------|---------|--------|--------|
| 1 |      | 4.013 | 117556  | 28229  | 3.45   |
| 2 |      | 4.248 | 3287456 | 584515 | 96.55  |

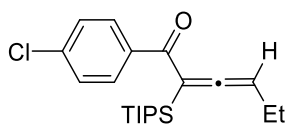

**Scheme 2, entry 4**  
*(R,S)*-L1: 90% ee; *(S,R)*-L1: 90% ee

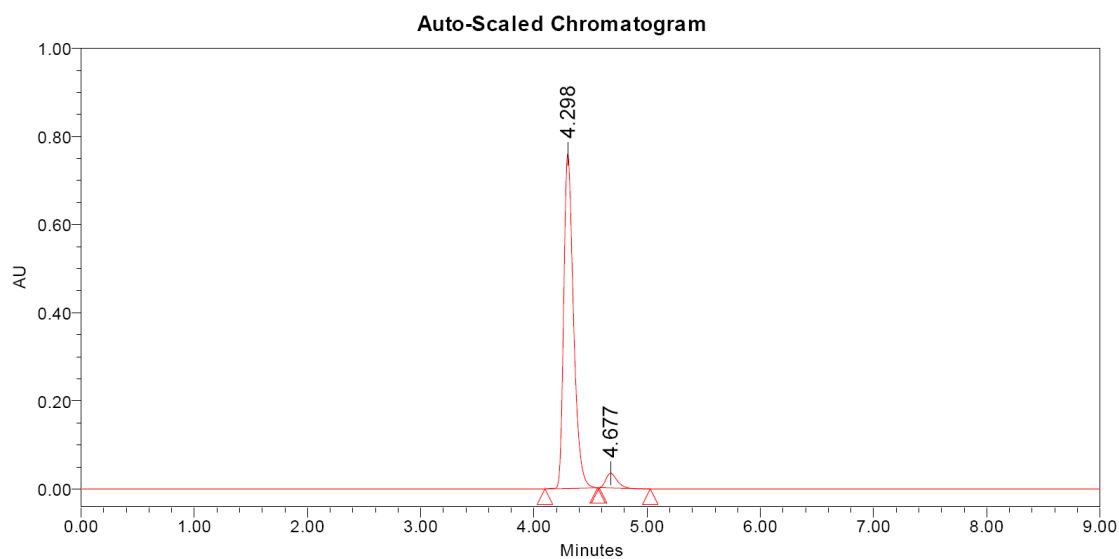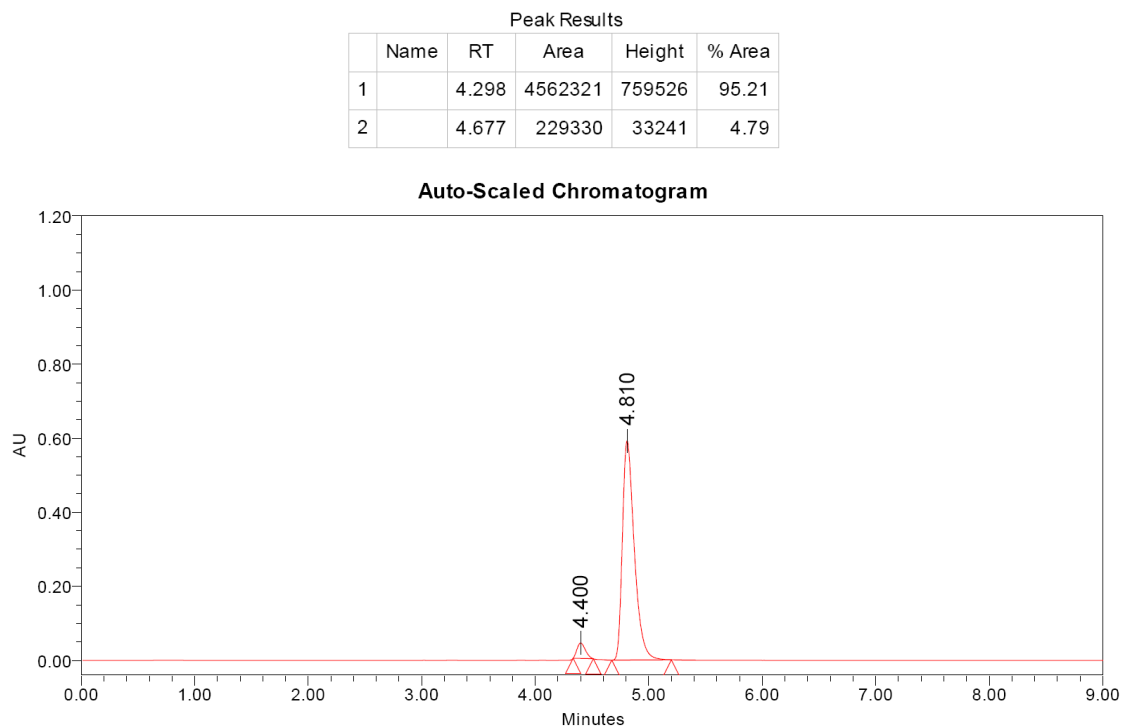

**Peak Results**

|   | Name | RT    | Area    | Height | % Area |
|---|------|-------|---------|--------|--------|
| 1 |      | 4.400 | 214420  | 41867  | 4.74   |
| 2 |      | 4.810 | 4307473 | 592514 | 95.26  |



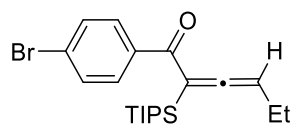

**Scheme 2, entry 5**  
*(R,S)*-L1: 90% ee; *(S,R)*-L1: 90% ee

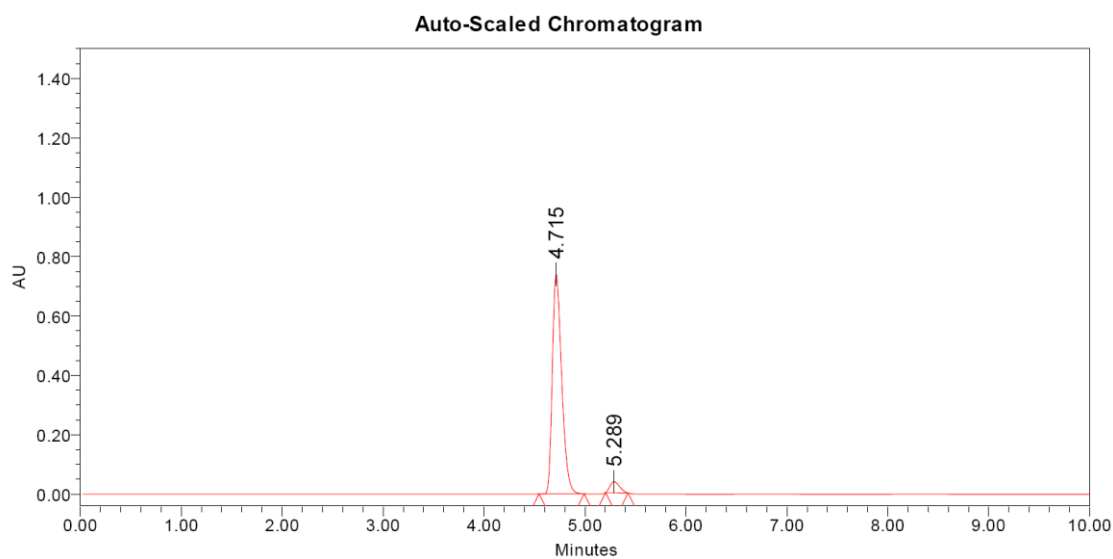

| Peak Results |      |       |         |        |        |
|--------------|------|-------|---------|--------|--------|
|              | Name | RT    | Area    | Height | % Area |
| 1            |      | 4.715 | 4773449 | 739356 | 95.07  |
| 2            |      | 5.289 | 247273  | 37243  | 4.93   |

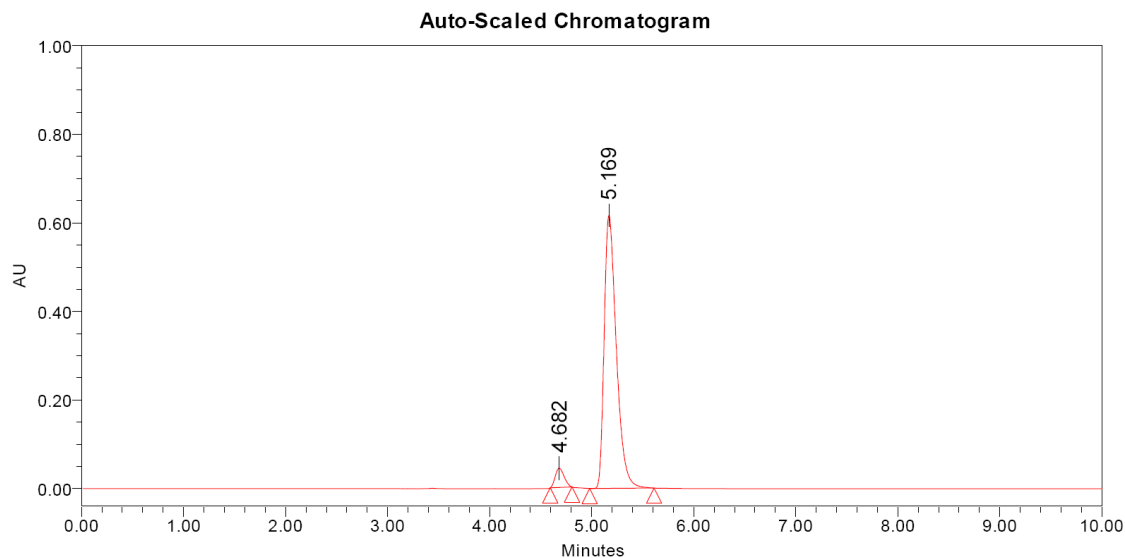

| Peak Results |      |       |         |        |        |
|--------------|------|-------|---------|--------|--------|
|              | Name | RT    | Area    | Height | % Area |
| 1            |      | 4.682 | 262132  | 43525  | 4.90   |
| 2            |      | 5.169 | 5090827 | 616535 | 95.10  |

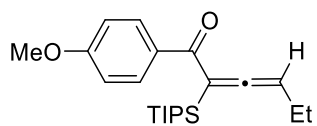

**Scheme 2, entry 6**  
*(R,S)*-L1: 93% ee; *(S,R)*-L1: 93% ee

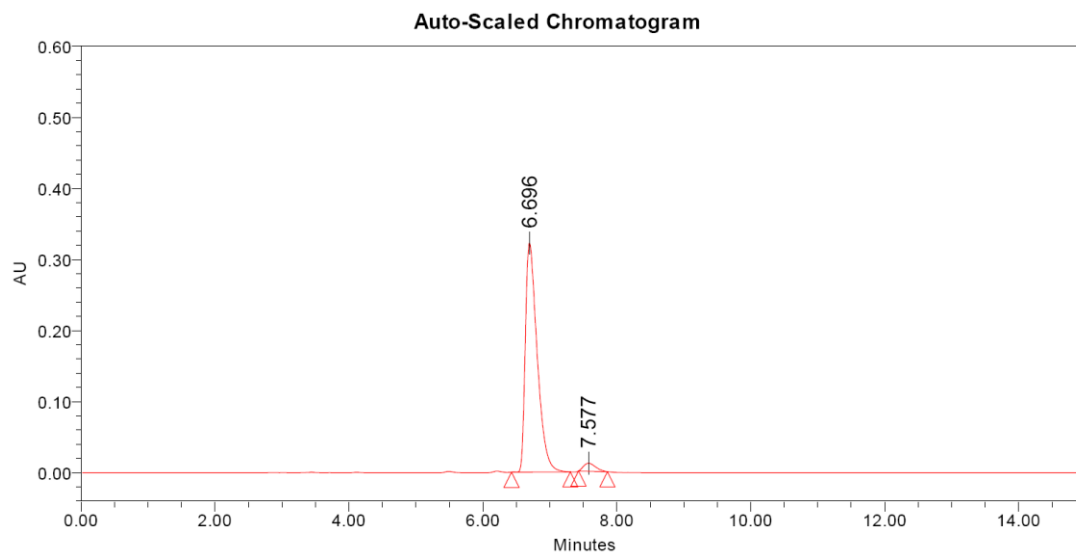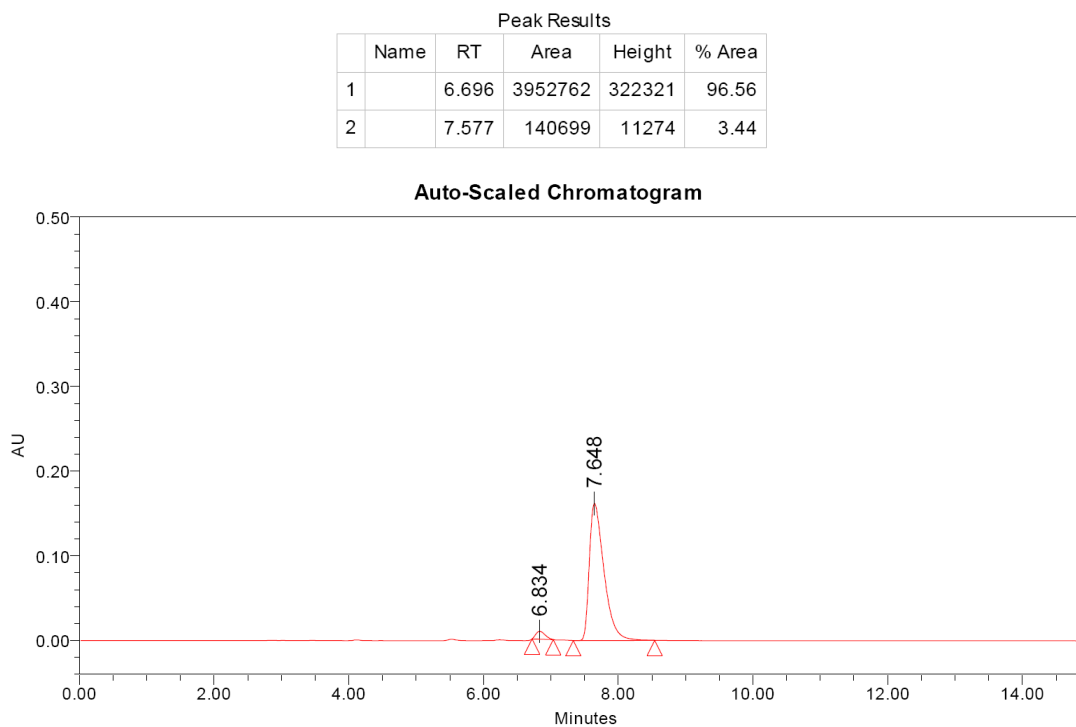

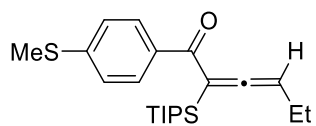

**Scheme 2, entry 7**  
 (R,S)-L1: 93% ee; (S,R)-L1: 93% ee

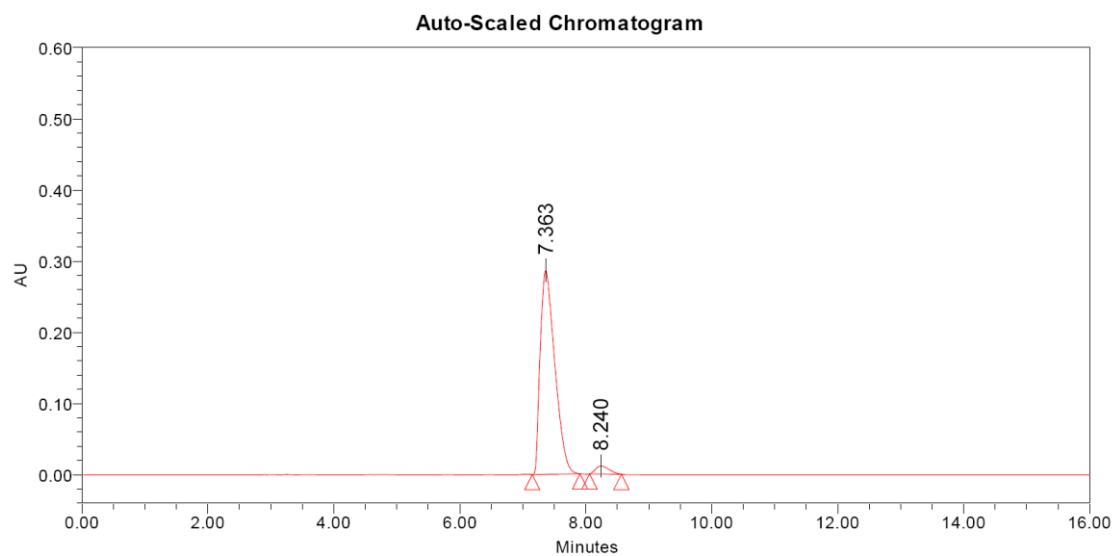

Peak Results

|   | Name | RT    | Area    | Height | % Area |
|---|------|-------|---------|--------|--------|
| 1 |      | 7.363 | 4608514 | 286286 | 96.52  |
| 2 |      | 8.240 | 166178  | 11180  | 3.48   |

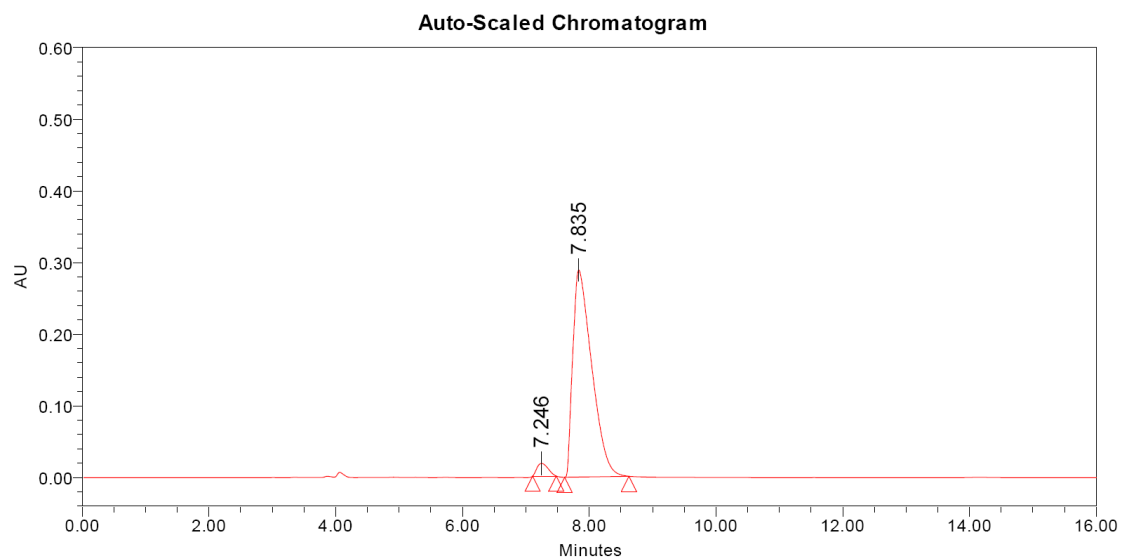

Peak Results

|   | Name | RT    | Area    | Height | % Area |
|---|------|-------|---------|--------|--------|
| 1 |      | 7.246 | 215281  | 17752  | 3.47   |
| 2 |      | 7.835 | 5992505 | 288925 | 96.53  |

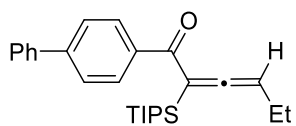

**Scheme 2, entry 8**  
 (*R,S*)-L1: 91% ee; (*S,R*)-L1: 91% ee

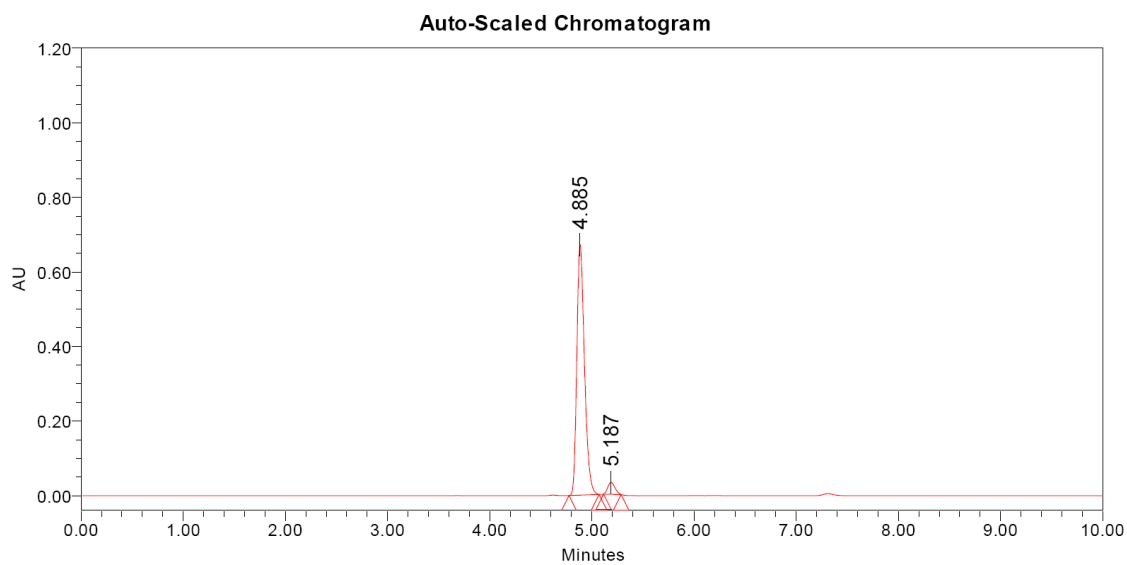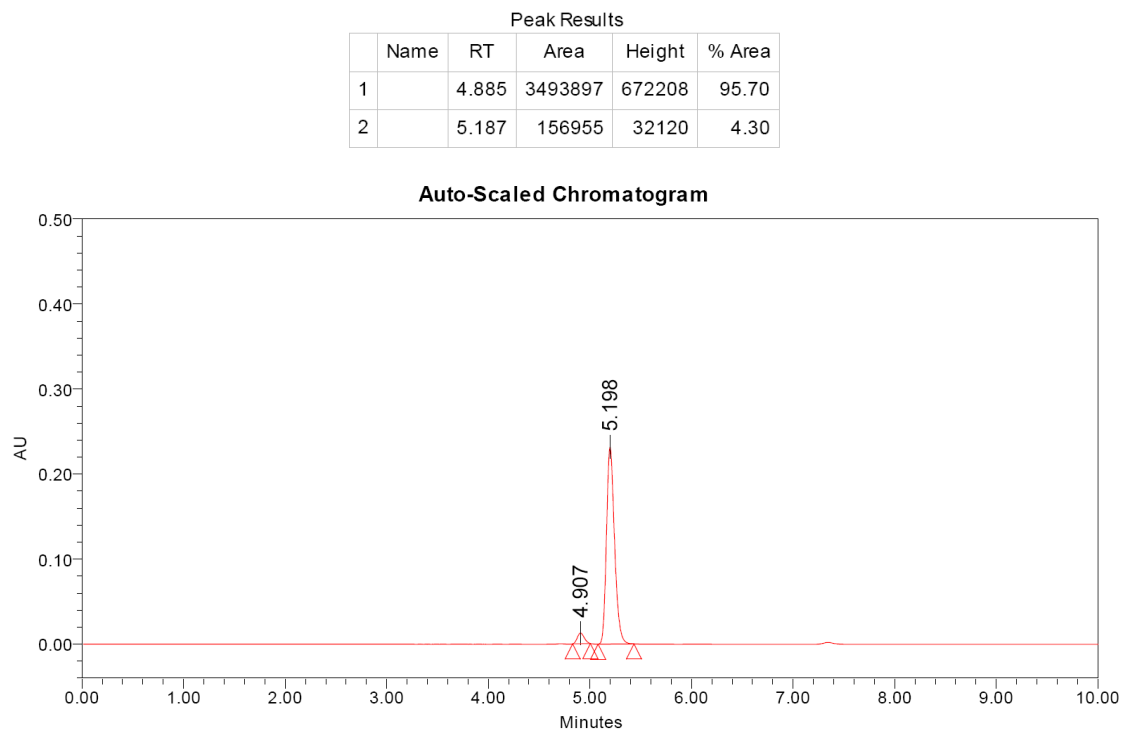

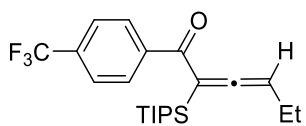

**Scheme 2, entry 9**  
 (*R,S*)-L1: 82% ee; (*S,R*)-L1: 82% ee

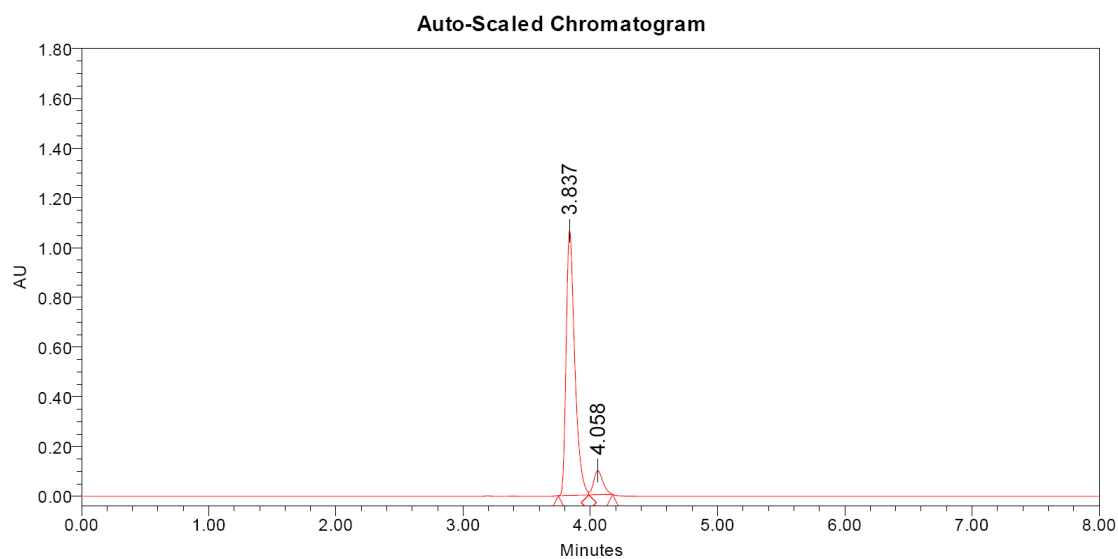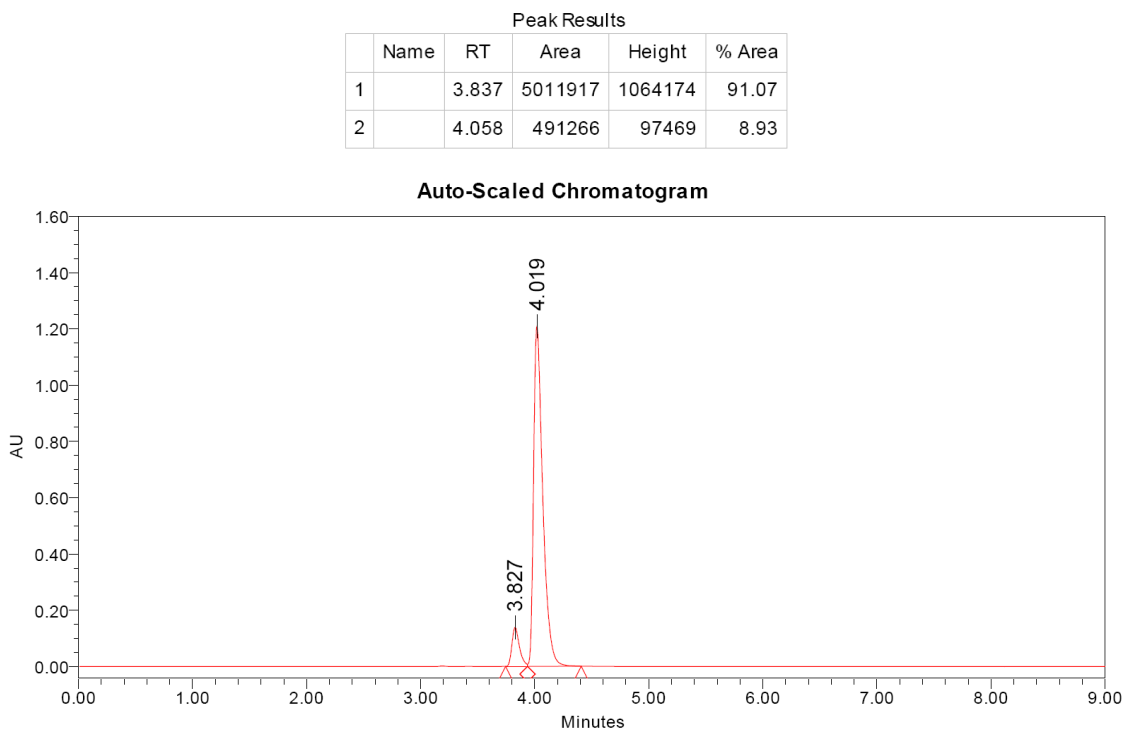

**Peak Results**

|   | Name | RT    | Area    | Height  | % Area |
|---|------|-------|---------|---------|--------|
| 1 |      | 3.827 | 632027  | 138374  | 8.56   |
| 2 |      | 4.019 | 6747930 | 1208675 | 91.44  |

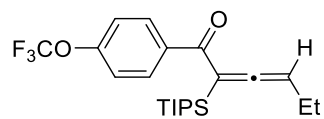

**Scheme 2, entry 10**  
*(R,S)*-L1: 84% ee; *(S,R)*-L1: 84% ee

**Auto-Scaled Chromatogram**

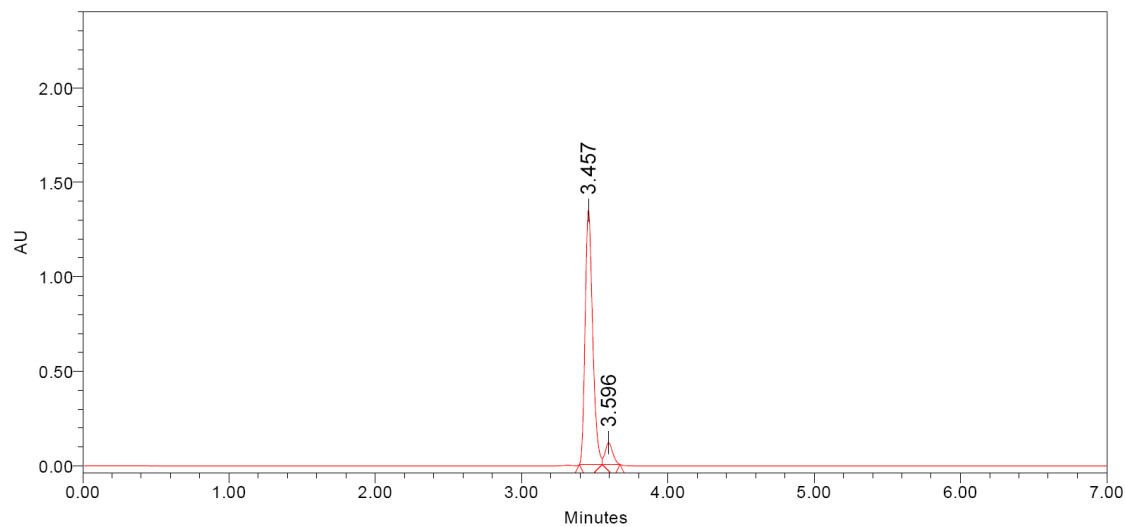

**Peak Results**

|   | Name | RT    | Area    | Height  | % Area |
|---|------|-------|---------|---------|--------|
| 1 |      | 3.457 | 4804307 | 1346829 | 92.03  |
| 2 |      | 3.596 | 416175  | 114893  | 7.97   |

**Auto-Scaled Chromatogram**

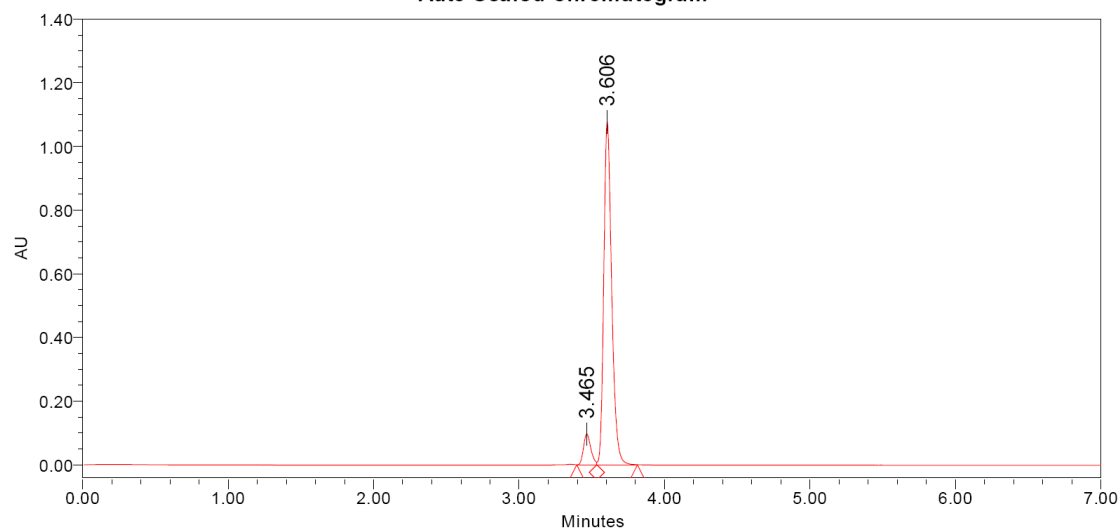

**Peak Results**

|   | Name | RT    | Area    | Height  | % Area |
|---|------|-------|---------|---------|--------|
| 1 |      | 3.465 | 338206  | 96578   | 7.68   |
| 2 |      | 3.606 | 4063196 | 1076982 | 92.32  |

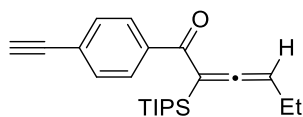

**Scheme 2, entry 11**  
*(R,S)*-L1: 87% ee; *(S,R)*-L1: 87% ee

**Auto-Scaled Chromatogram**

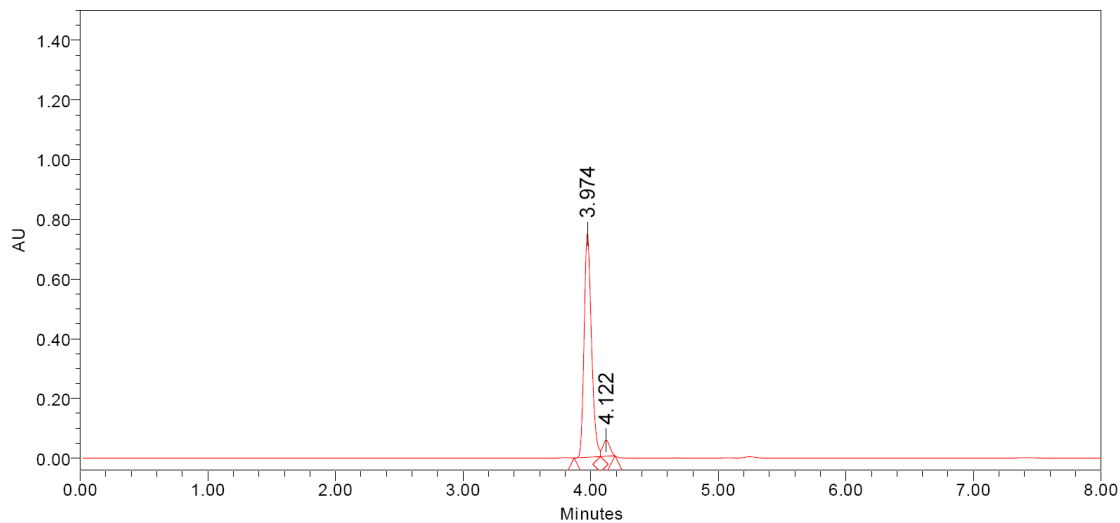

**Peak Results**

|   | Name | RT    | Area    | Height | % Area |
|---|------|-------|---------|--------|--------|
| 1 |      | 3.974 | 2991541 | 748639 | 93.51  |
| 2 |      | 4.122 | 207728  | 54005  | 6.49   |

**Auto-Scaled Chromatogram**

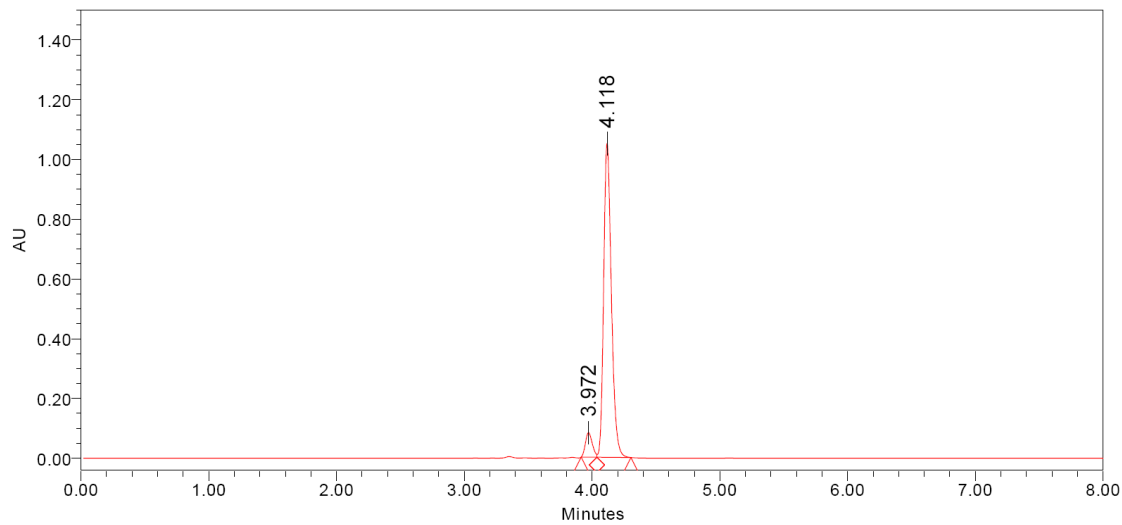

**Peak Results**

|   | Name | RT    | Area    | Height  | % Area |
|---|------|-------|---------|---------|--------|
| 1 |      | 3.972 | 305797  | 82040   | 6.49   |
| 2 |      | 4.118 | 4404321 | 1052301 | 93.51  |

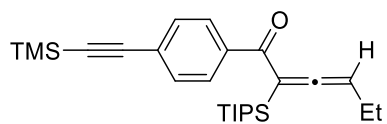

**Figure 2, entry 12**  
 (*R,S*)-L1: 88% ee; (*S,R*)-L1: 88% ee

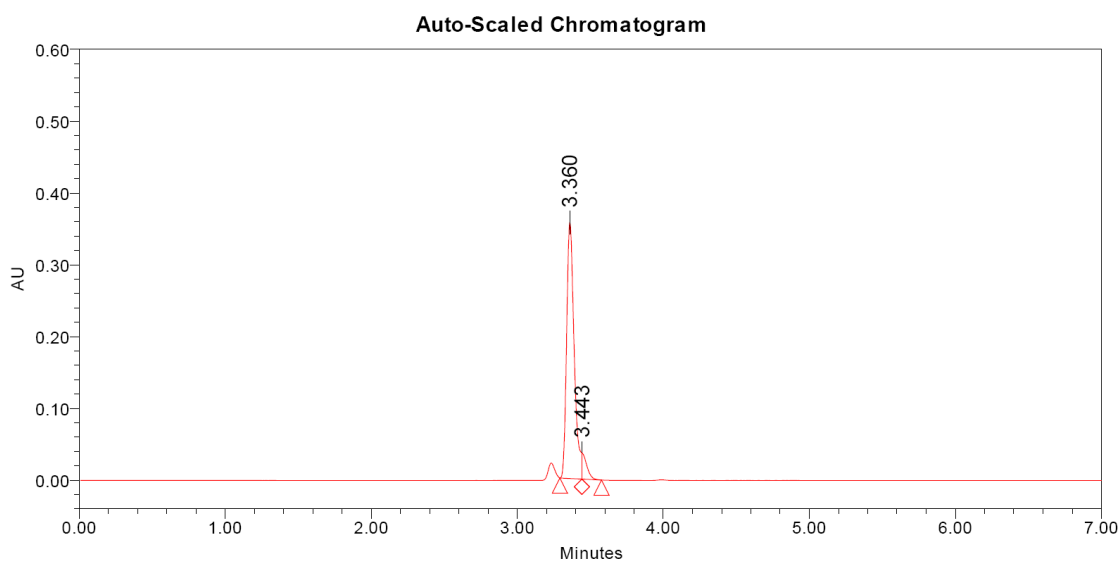

| Peak Results |      |       |         |        |        |
|--------------|------|-------|---------|--------|--------|
|              | Name | RT    | Area    | Height | % Area |
| 1            |      | 3.360 | 1275510 | 356754 | 93.92  |
| 2            |      | 3.443 | 82584   | 36465  | 6.08   |

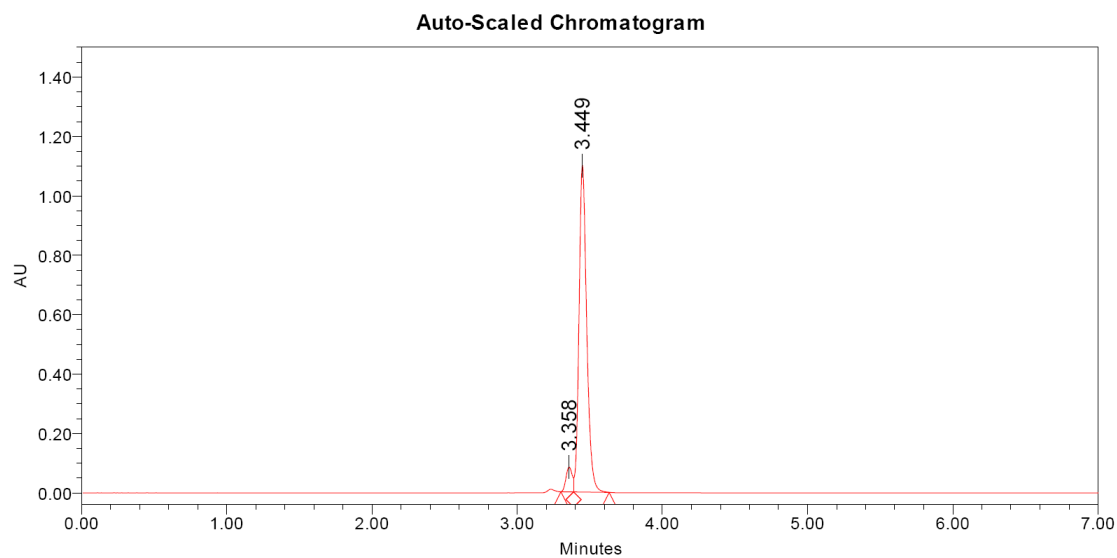

| Peak Results |      |       |         |         |        |
|--------------|------|-------|---------|---------|--------|
|              | Name | RT    | Area    | Height  | % Area |
| 1            |      | 3.358 | 244408  | 83277   | 5.69   |
| 2            |      | 3.449 | 4051460 | 1099956 | 94.31  |



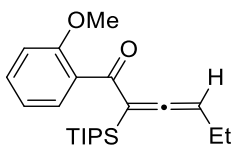

**Scheme 2, entry 13**  
*(R,S)*-L1: 77% ee; *(S,R)*-L1: 77% ee

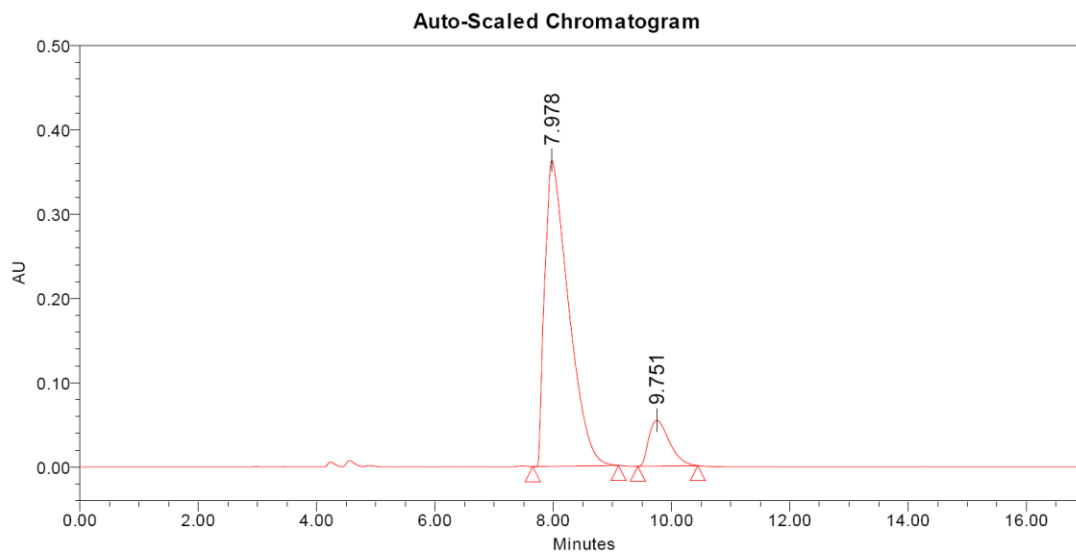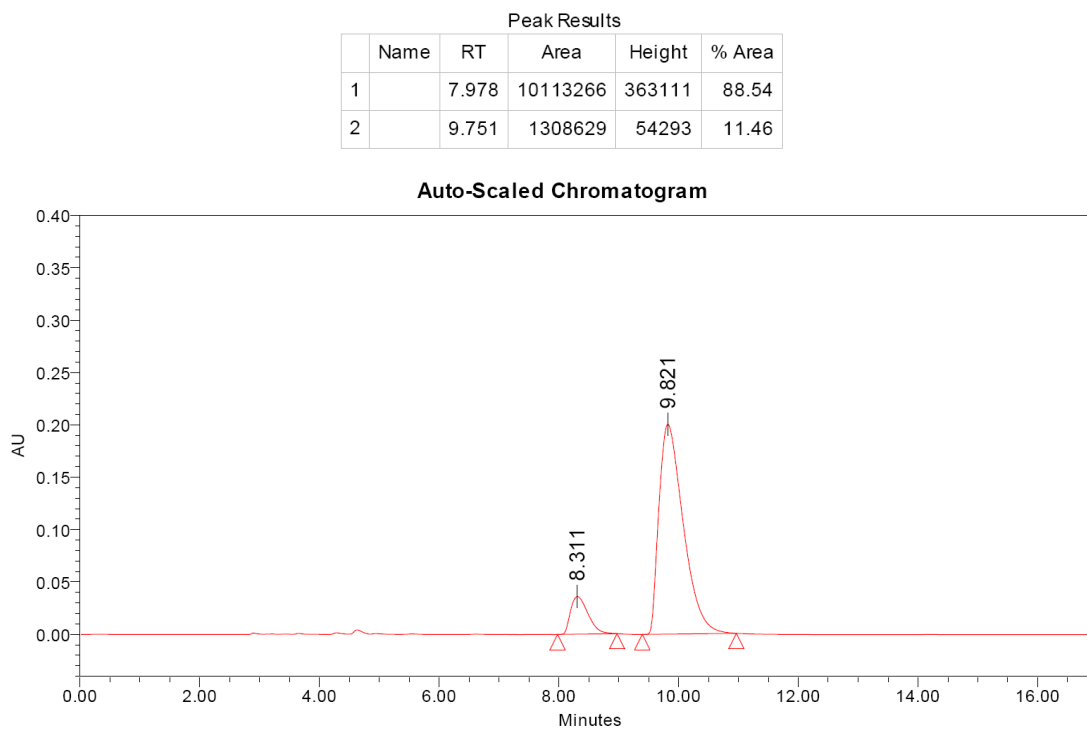

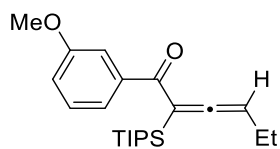

**Scheme 2, entry 14**  
 (R,S)-L1: 90% ee; (S,R)-L1: 90% ee

**Auto-Scaled Chromatogram**

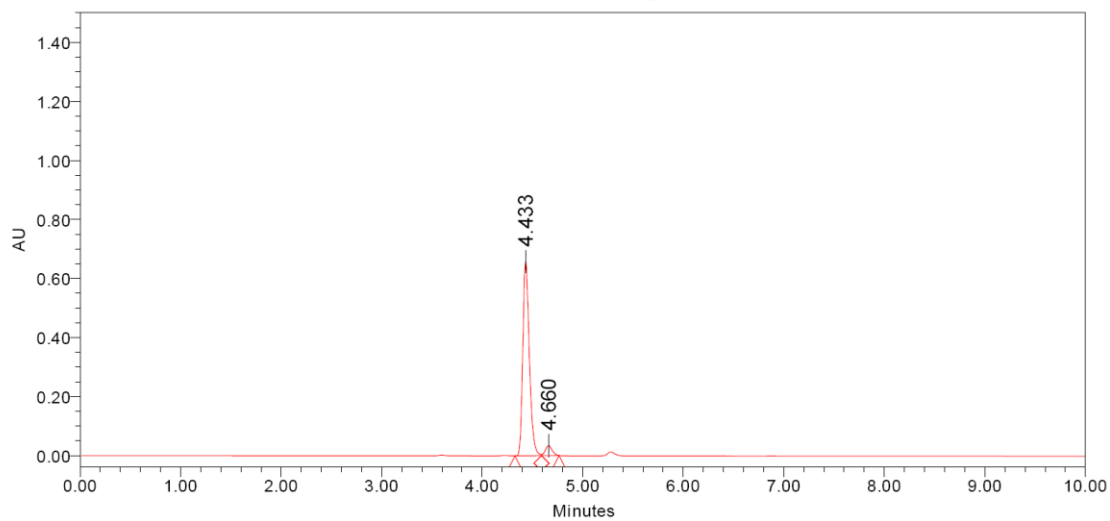

**Peak Results**

|   | Name | RT    | Area    | Height | % Area |
|---|------|-------|---------|--------|--------|
| 1 |      | 4.433 | 2978510 | 658874 | 95.03  |
| 2 |      | 4.660 | 155615  | 33532  | 4.97   |

**Auto-Scaled Chromatogram**

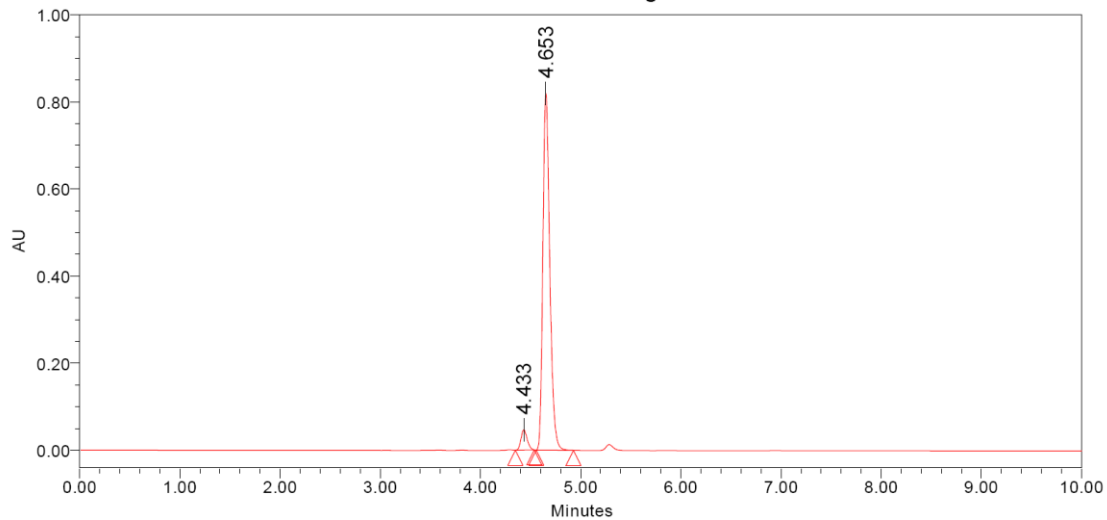

**Peak Results**

|   | Name | RT    | Area    | Height | % Area |
|---|------|-------|---------|--------|--------|
| 1 |      | 4.433 | 200843  | 46679  | 4.87   |
| 2 |      | 4.653 | 3926407 | 819496 | 95.13  |

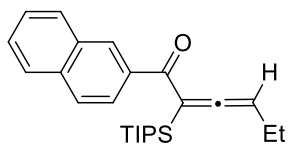

**Scheme 2, entry 15**  
 (R,S)-L1: 93% ee; (S,R)-L1: 93% ee

**Auto-Scaled Chromatogram**

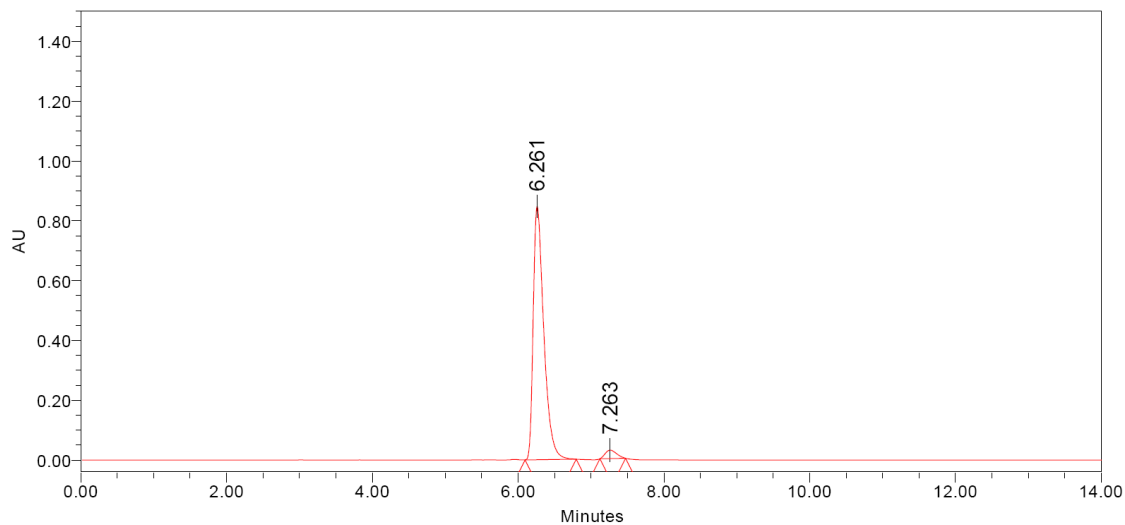

**Peak Results**

|   | Name | RT    | Area    | Height | % Area |
|---|------|-------|---------|--------|--------|
| 1 |      | 6.261 | 8528704 | 847436 | 96.53  |
| 2 |      | 7.263 | 306200  | 28246  | 3.47   |

**Auto-Scaled Chromatogram**

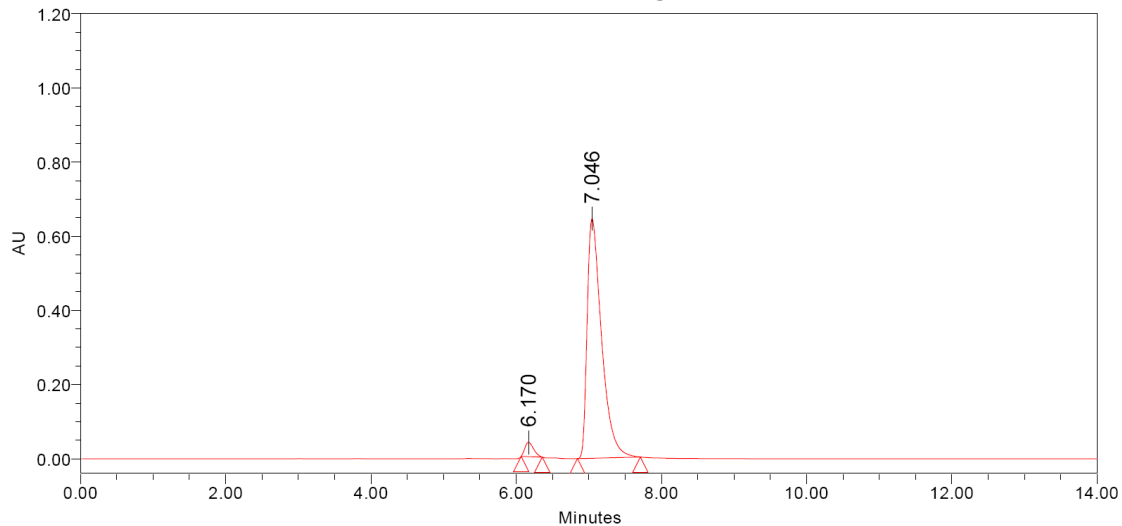

**Peak Results**

|   | Name | RT    | Area    | Height | % Area |
|---|------|-------|---------|--------|--------|
| 1 |      | 6.170 | 322552  | 38846  | 3.50   |
| 2 |      | 7.046 | 8892007 | 645891 | 96.50  |

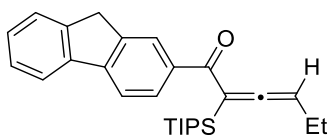

**Scheme 2, entry 16**  
*(R,S)*-L1: 92% ee; *(S,R)*-L1: 92% ee

**Auto-Scaled Chromatogram**

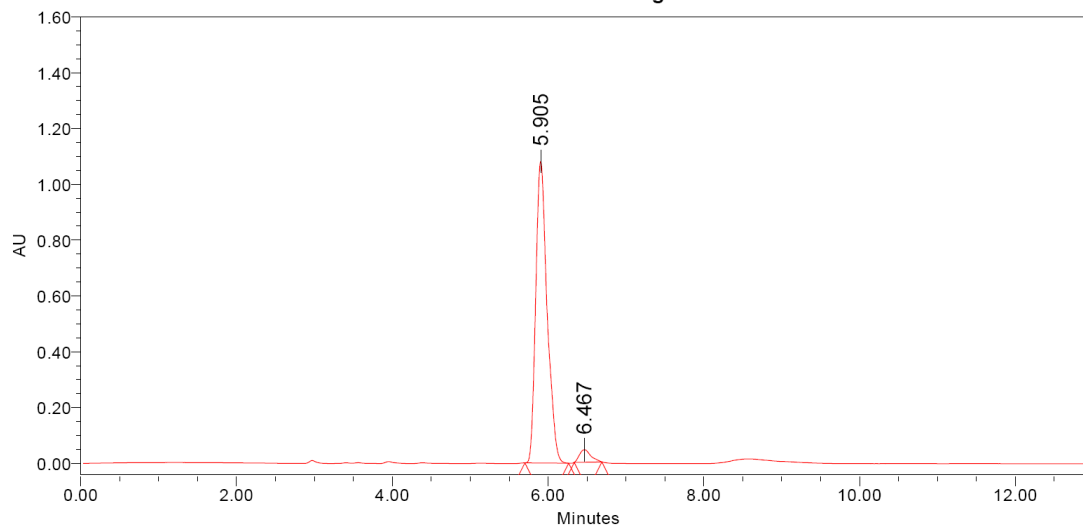

Peak Results

|   | Name | RT    | Area     | Height  | % Area |
|---|------|-------|----------|---------|--------|
| 1 |      | 5.905 | 10952617 | 1080482 | 96.04  |
| 2 |      | 6.467 | 451330   | 44860   | 3.96   |

**Auto-Scaled Chromatogram**

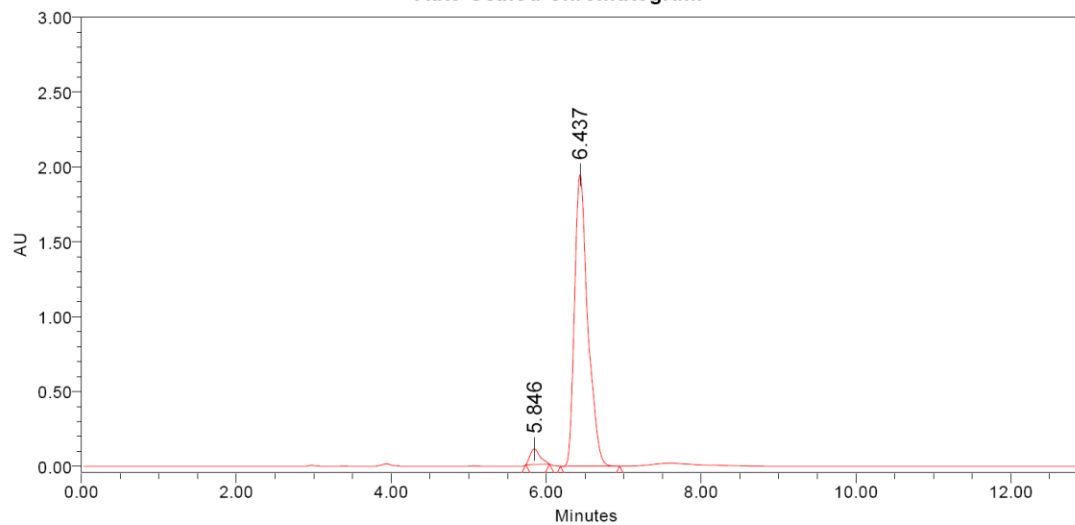

Peak Results

|   | Name | RT    | Area     | Height  | % Area |
|---|------|-------|----------|---------|--------|
| 1 |      | 5.846 | 915763   | 103138  | 3.81   |
| 2 |      | 6.437 | 23110238 | 1947391 | 96.19  |

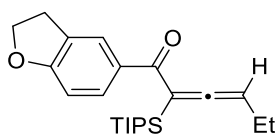

**Scheme 2, entry 17**  
*(R,S)*-L1: 90% ee; *(S,R)*-L1: 89% ee

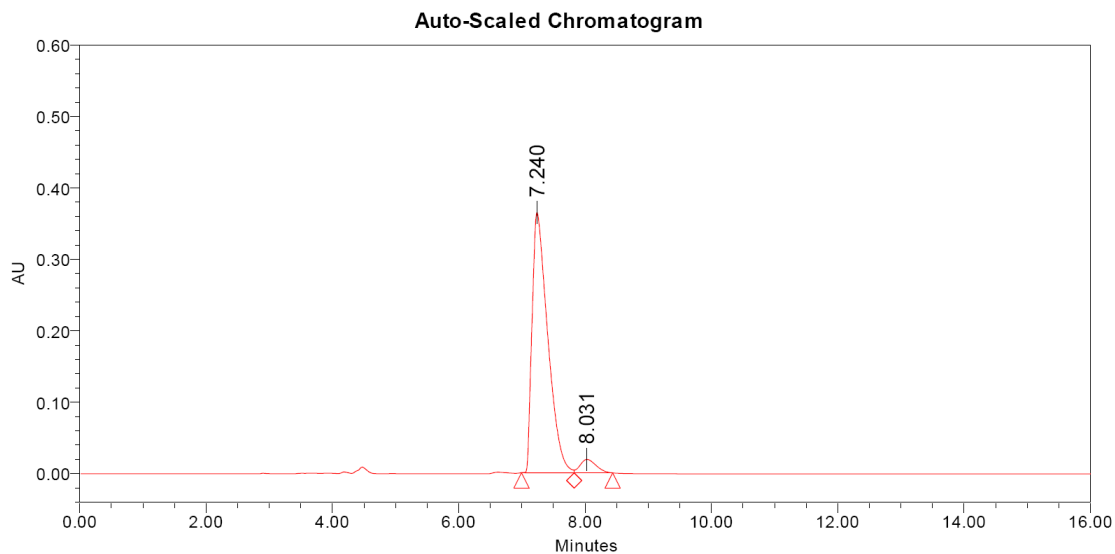

Peak Results

|   | Name | RT    | Area    | Height | % Area |
|---|------|-------|---------|--------|--------|
| 1 |      | 7.240 | 6273708 | 364633 | 95.00  |
| 2 |      | 8.031 | 330167  | 18849  | 5.00   |

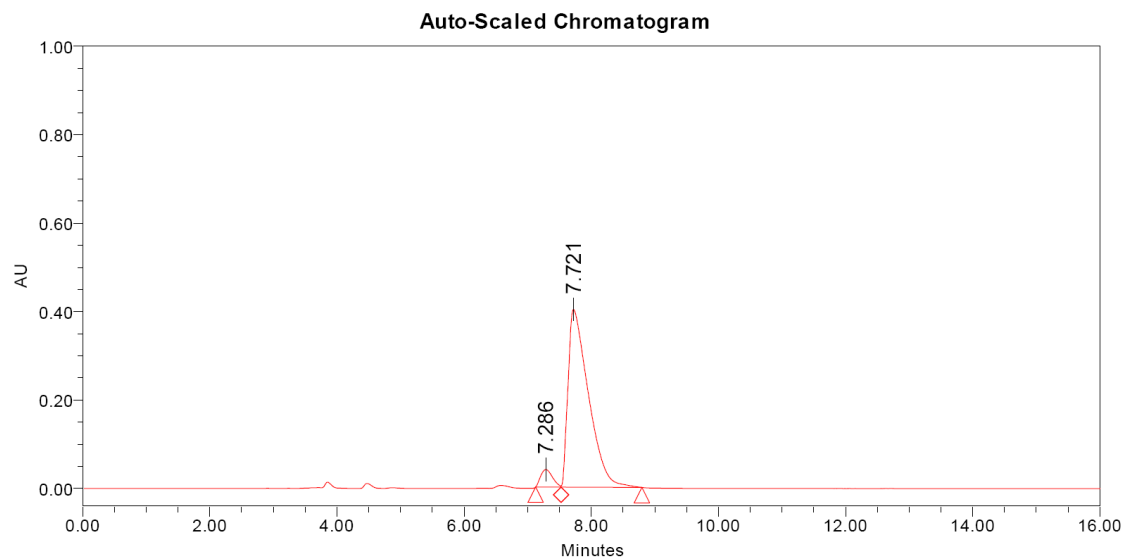

Peak Results

|   | Name | RT    | Area    | Height | % Area |
|---|------|-------|---------|--------|--------|
| 1 |      | 7.286 | 509762  | 39591  | 5.39   |
| 2 |      | 7.721 | 8950682 | 401953 | 94.61  |

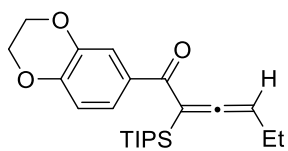

**Scheme 2, entry 18**  
*(R,S)*-L1: 91% ee; *(S,R)*-L1: 91% ee

**Auto-Scaled Chromatogram**

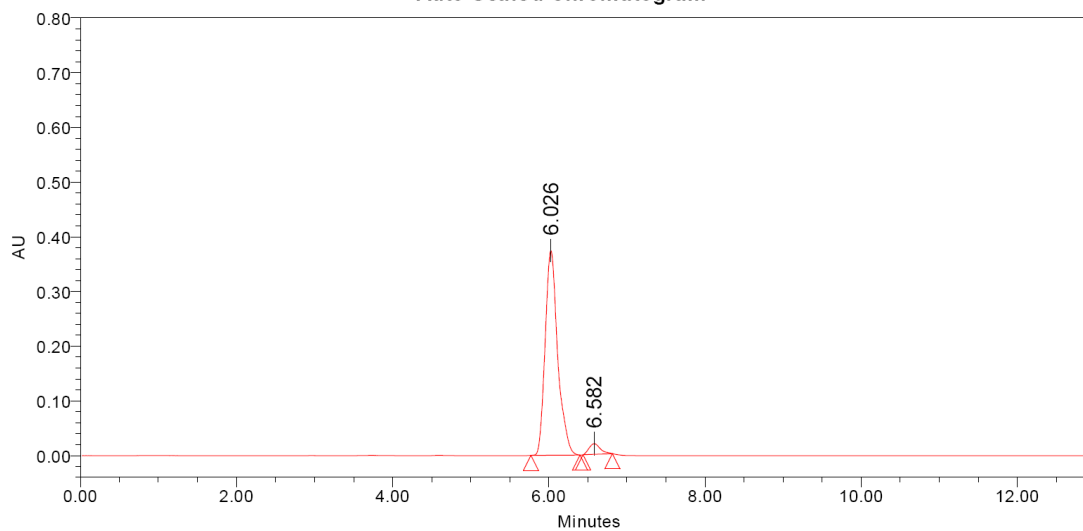

**Peak Results**

|   | Name | RT    | Area    | Height | % Area |
|---|------|-------|---------|--------|--------|
| 1 |      | 6.026 | 4183805 | 374108 | 95.57  |
| 2 |      | 6.582 | 193884  | 19391  | 4.43   |

**Auto-Scaled Chromatogram**

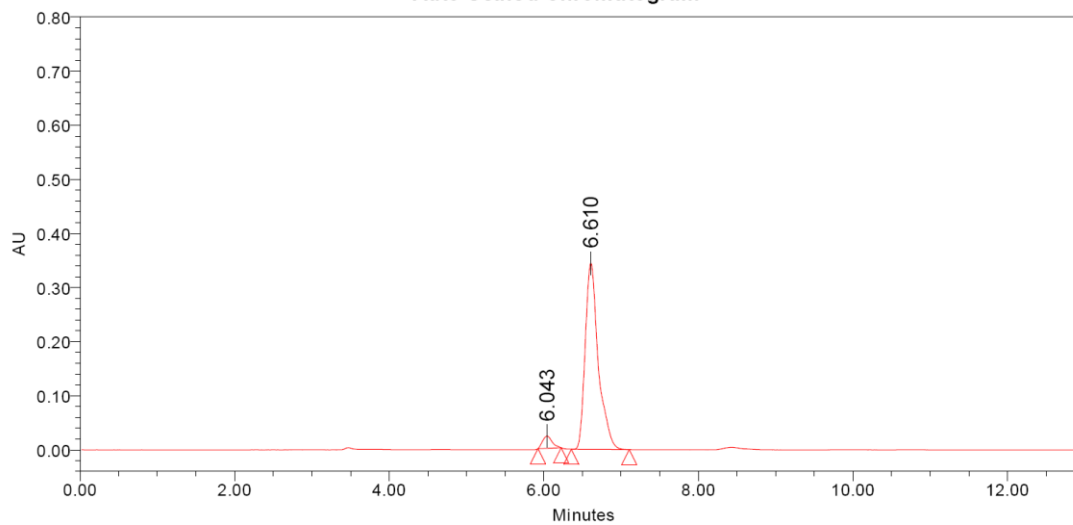

**Peak Results**

|   | Name | RT    | Area    | Height | % Area |
|---|------|-------|---------|--------|--------|
| 1 |      | 6.043 | 190671  | 22355  | 4.50   |
| 2 |      | 6.610 | 4043977 | 344228 | 95.50  |

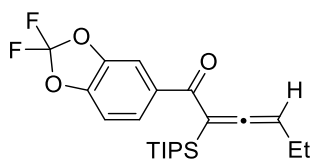

**Scheme 2, entry 19**  
 (*R,S*)-L1: 92% ee; (*S,R*)-L1: 91% ee

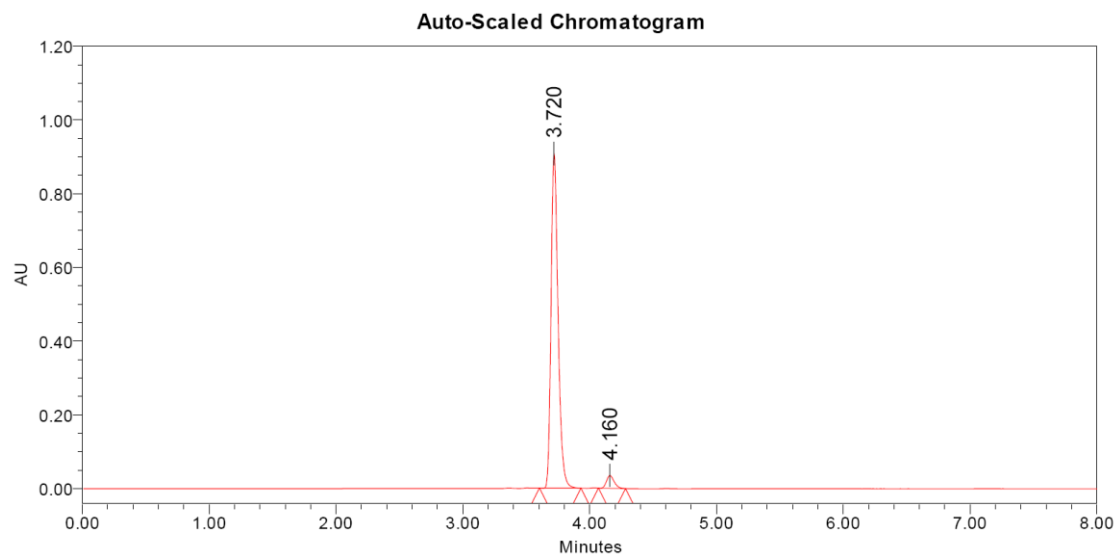

Peak Results

|   | Name | RT    | Area    | Height | % Area |
|---|------|-------|---------|--------|--------|
| 1 |      | 3.720 | 3486715 | 906960 | 96.01  |
| 2 |      | 4.160 | 145070  | 34687  | 3.99   |

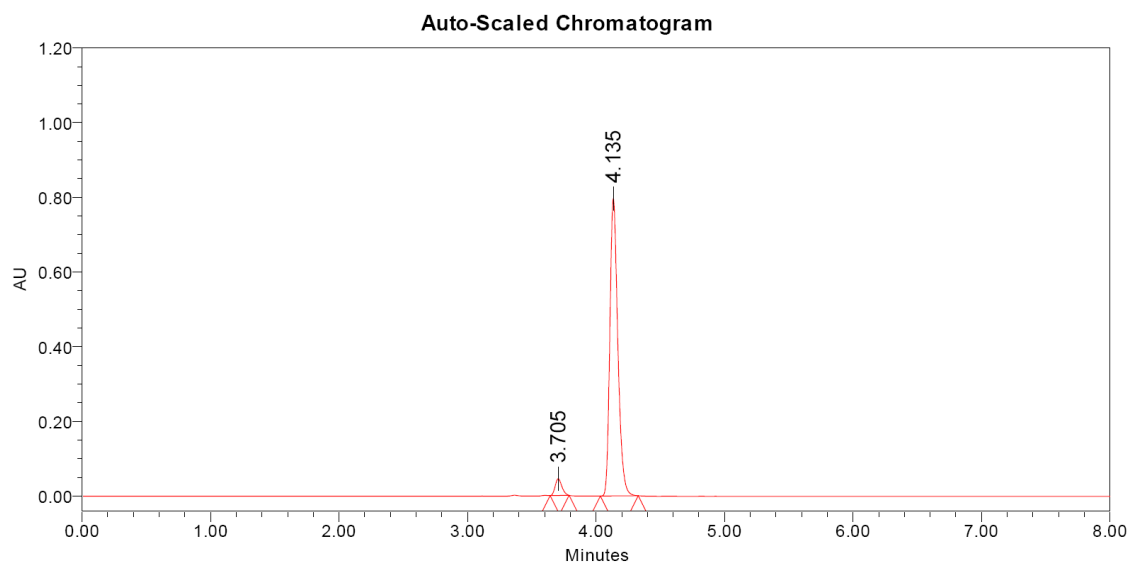

Peak Results

|   | Name | RT    | Area    | Height | % Area |
|---|------|-------|---------|--------|--------|
| 1 |      | 3.705 | 161431  | 44850  | 4.50   |
| 2 |      | 4.135 | 3424146 | 796354 | 95.50  |

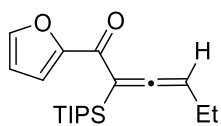

**Scheme 2, entry 20**  
 (R,S)-L1: 66% ee; (S,R)-L1: 67% ee

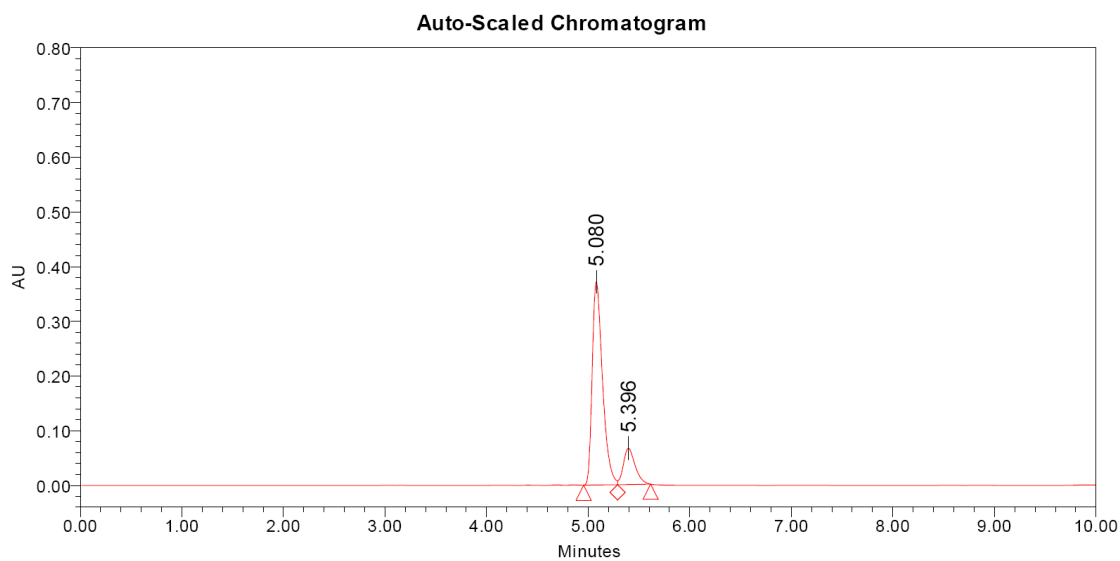

Peak Results

|   | Name | RT    | Area    | Height | % Area |
|---|------|-------|---------|--------|--------|
| 1 |      | 5.080 | 2615441 | 371473 | 83.07  |
| 2 |      | 5.396 | 533161  | 66272  | 16.93  |

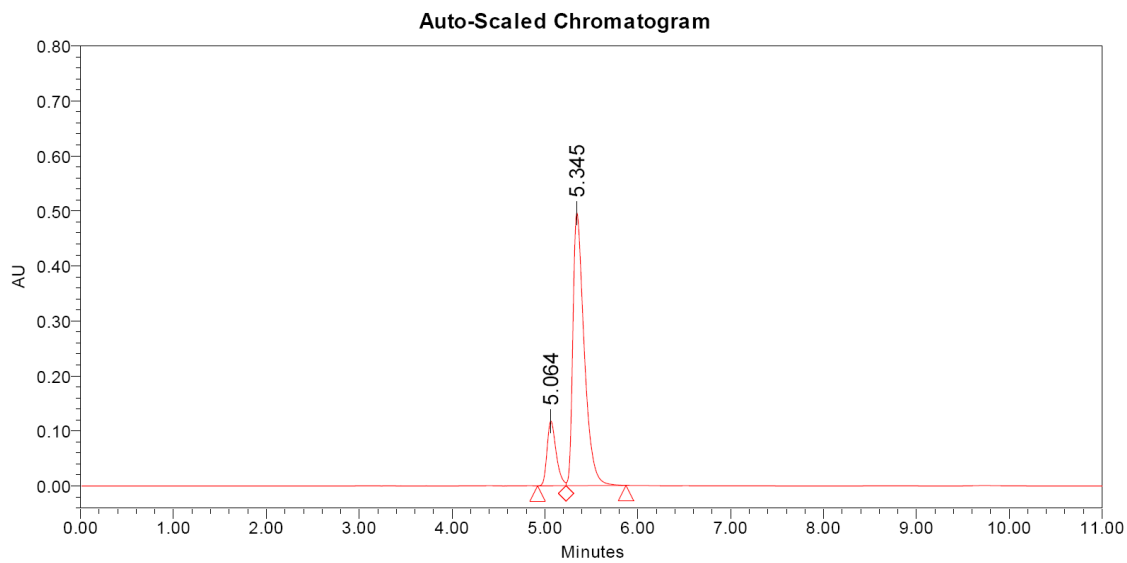

Peak Results

|   | Name | RT    | Area    | Height | % Area |
|---|------|-------|---------|--------|--------|
| 1 |      | 5.064 | 802919  | 117646 | 16.03  |
| 2 |      | 5.345 | 4206192 | 495859 | 83.97  |



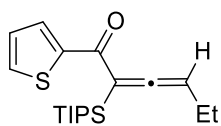

**Scheme 2, entry 21**  
 (*R,S*)-L1: 91% ee; (*S,R*)-L1: 90% ee

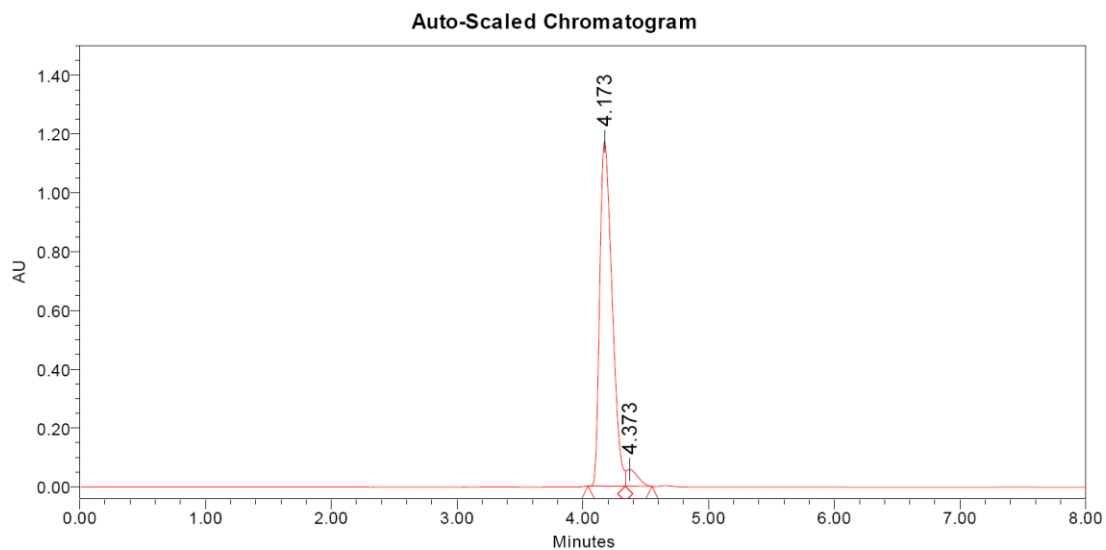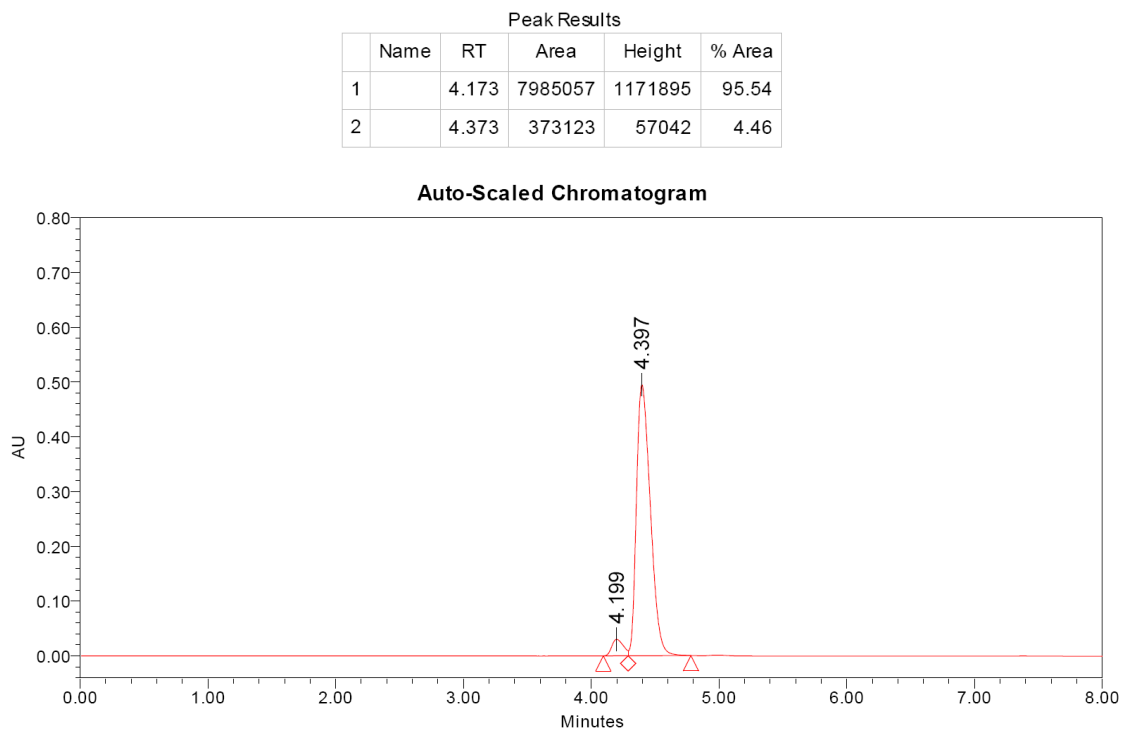

Peak Results

|   | Name | RT    | Area    | Height | % Area |
|---|------|-------|---------|--------|--------|
| 1 |      | 4.199 | 187193  | 30027  | 4.76   |
| 2 |      | 4.397 | 3742689 | 494906 | 95.24  |

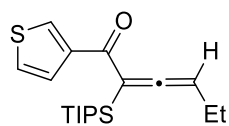

**Scheme 2, entry 22**  
*(R,S)*-L1: 91% ee; *(S,R)*-L1: 91% ee

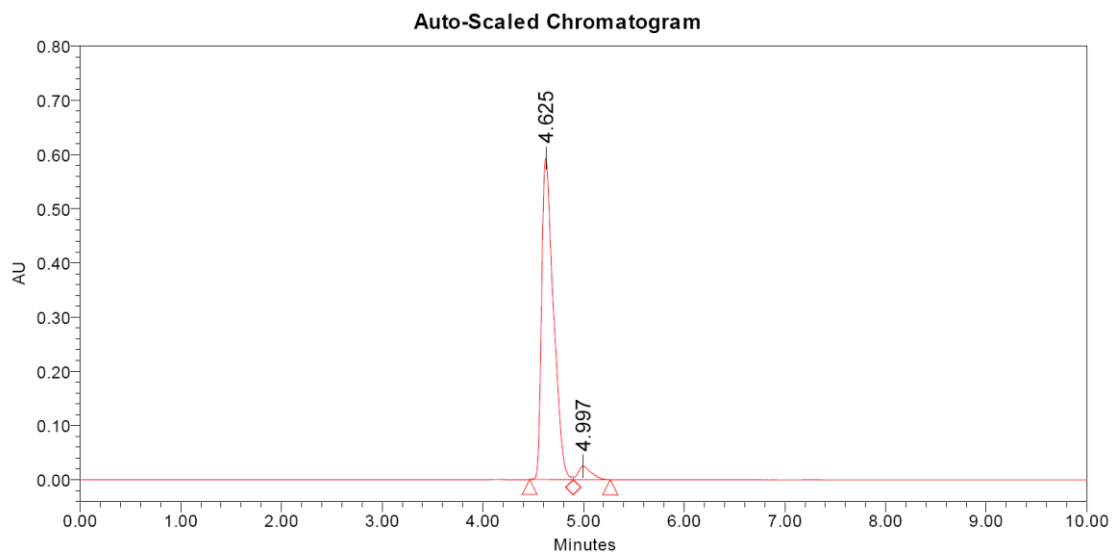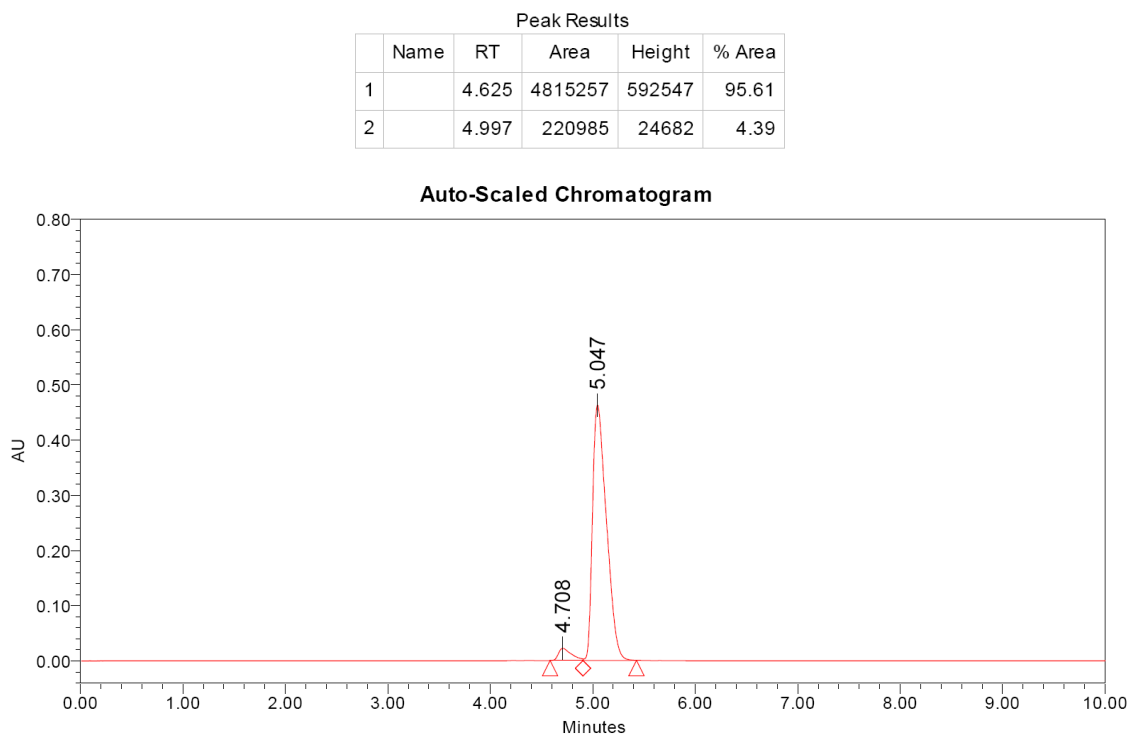

**Peak Results**

|   | Name | RT    | Area    | Height | % Area |
|---|------|-------|---------|--------|--------|
| 1 |      | 4.708 | 194663  | 22203  | 4.28   |
| 2 |      | 5.047 | 4349428 | 462462 | 95.72  |

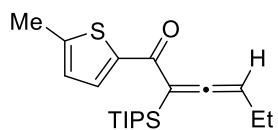

**Scheme 2, entry 23**  
*(R,S)*-L1: 93% ee; *(S,R)*-L1: 93% ee

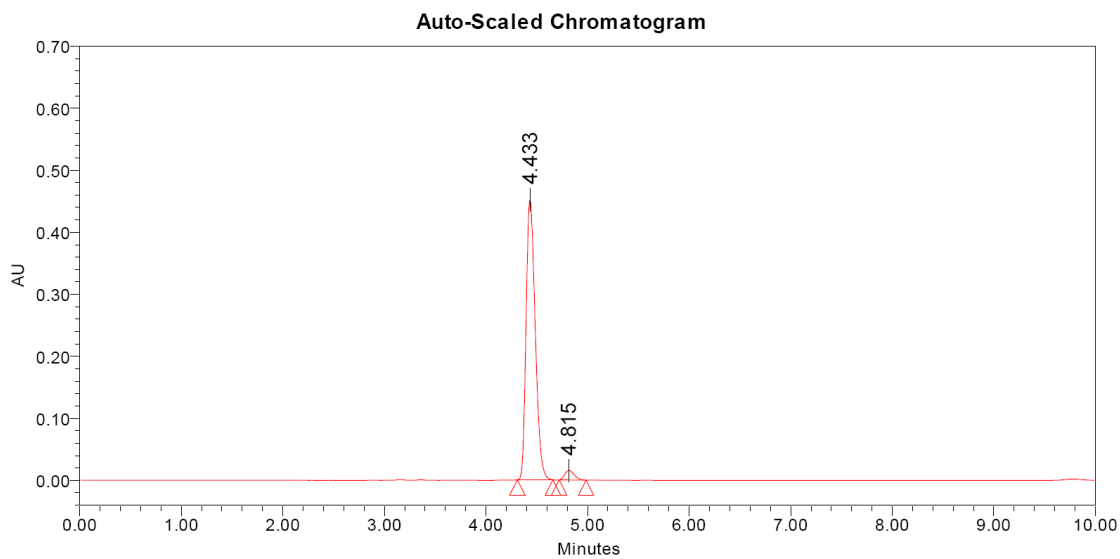

Peak Results

|   | Name | RT    | Area    | Height | % Area |
|---|------|-------|---------|--------|--------|
| 1 |      | 4.433 | 2818561 | 451485 | 96.59  |
| 2 |      | 4.815 | 99561   | 15186  | 3.41   |

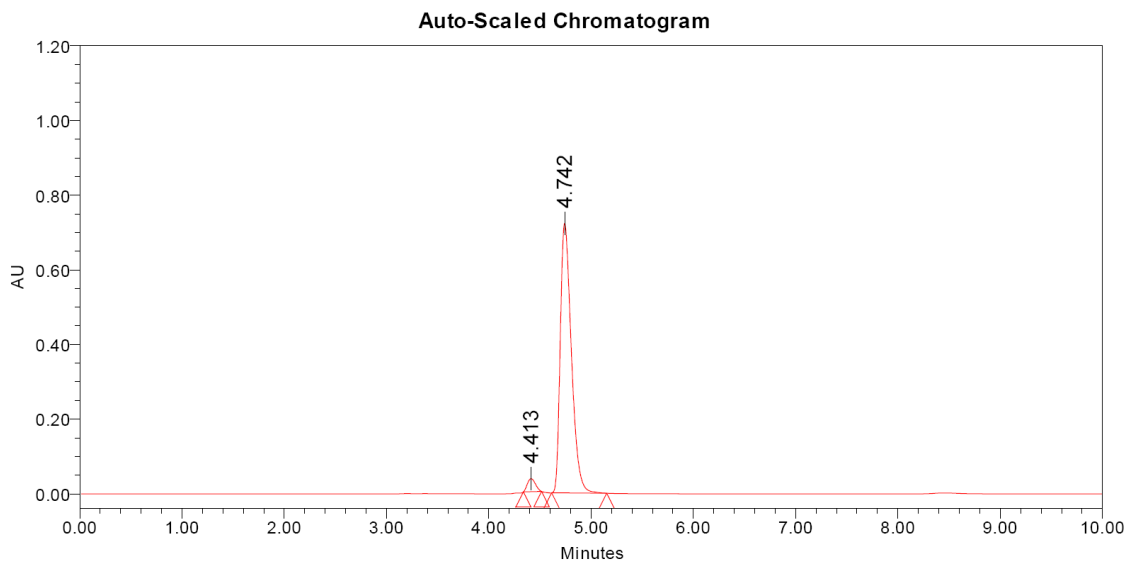

Peak Results

|   | Name | RT    | Area    | Height | % Area |
|---|------|-------|---------|--------|--------|
| 1 |      | 4.413 | 191769  | 35083  | 3.41   |
| 2 |      | 4.742 | 5425684 | 722588 | 96.59  |

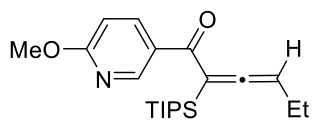

**Scheme 2, entry 24**  
 (*R,S*)-L1: 94% ee; (*S,R*)-L1: 94% ee

**Auto-Scaled Chromatogram**

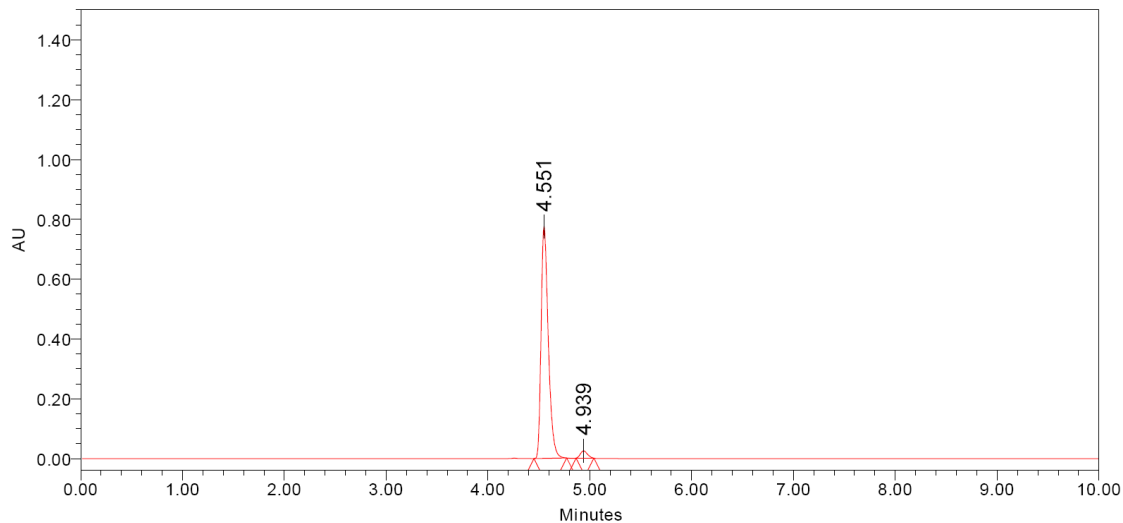

**Peak Results**

|   | Name | RT    | Area    | Height | % Area |
|---|------|-------|---------|--------|--------|
| 1 |      | 4.551 | 3798140 | 775842 | 97.05  |
| 2 |      | 4.939 | 115476  | 24155  | 2.95   |

**Auto-Scaled Chromatogram**

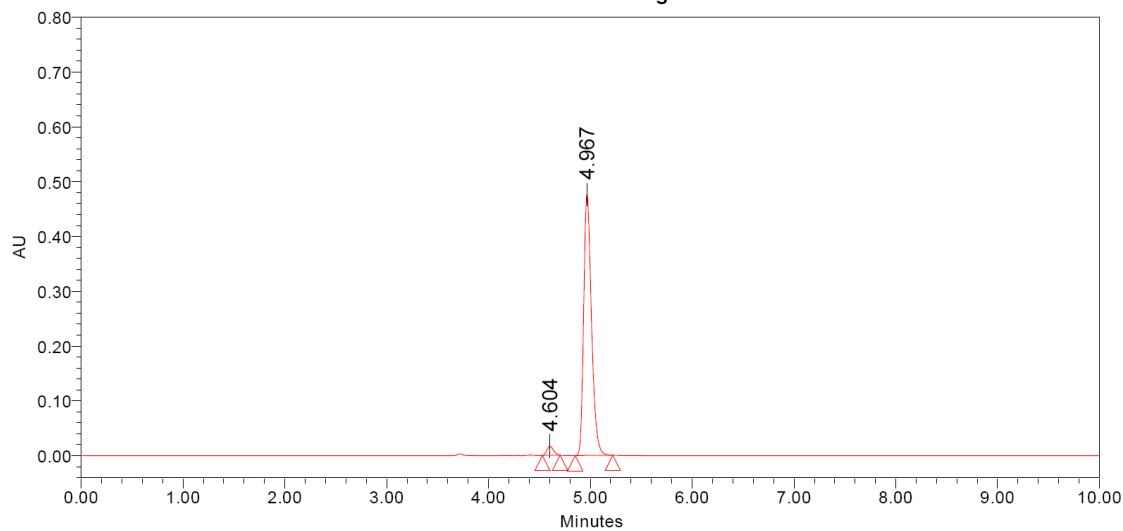

**Peak Results**

|   | Name | RT    | Area    | Height | % Area |
|---|------|-------|---------|--------|--------|
| 1 |      | 4.604 | 74337   | 16372  | 2.85   |
| 2 |      | 4.967 | 2538507 | 476264 | 97.15  |

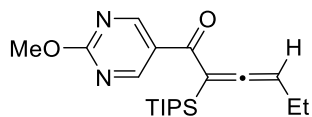

**Scheme 2, entry 25**  
*(R,S)*-L1: 90% ee; *(S,R)*-L1: 90% ee

**Auto-Scaled Chromatogram**

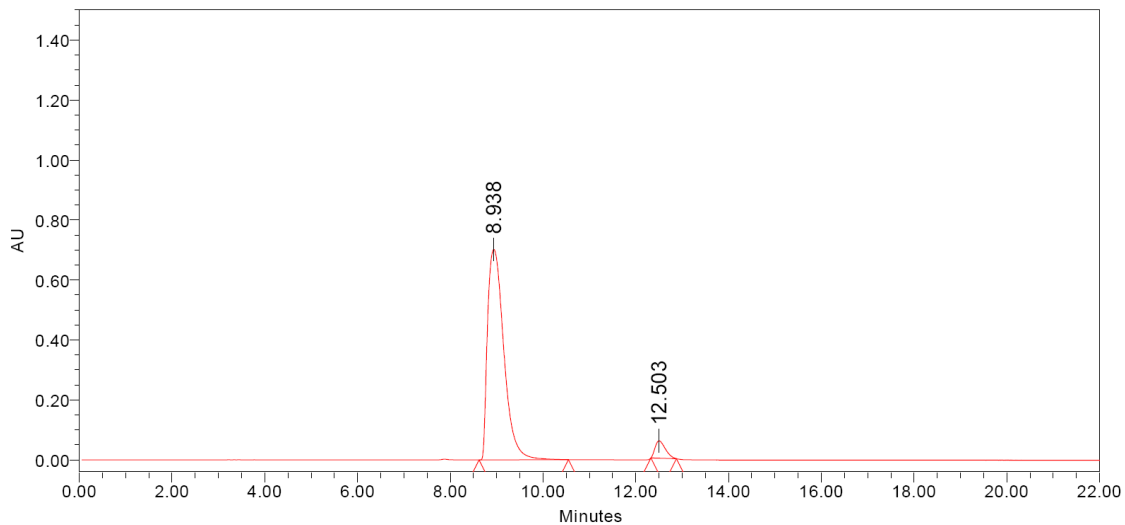

**Peak Results**

|   | Name | RT     | Area     | Height | % Area |
|---|------|--------|----------|--------|--------|
| 1 |      | 8.938  | 17135701 | 702360 | 95.07  |
| 2 |      | 12.503 | 888190   | 57897  | 4.93   |

**Auto-Scaled Chromatogram**

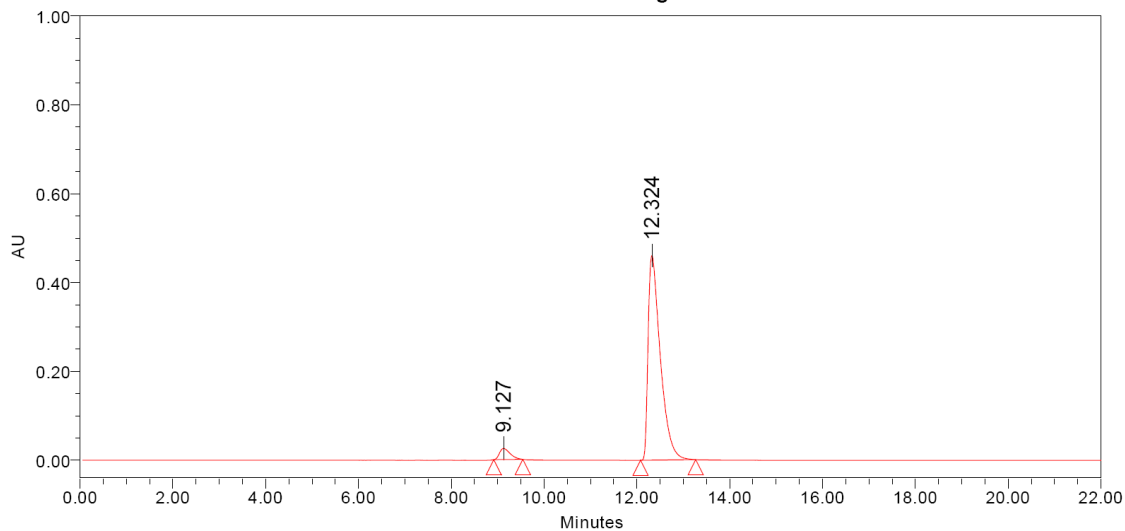

**Peak Results**

|   | Name | RT     | Area    | Height | % Area |
|---|------|--------|---------|--------|--------|
| 1 |      | 9.127  | 397671  | 25044  | 4.52   |
| 2 |      | 12.324 | 8404586 | 460693 | 95.48  |

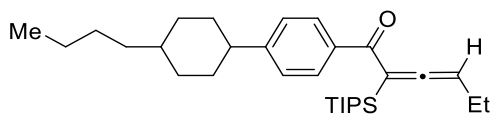

**Scheme 2, entry 26**  
*(R,S)*-L1: 90% ee; *(S,R)*-L1: 90% ee

**Auto-Scaled Chromatogram**

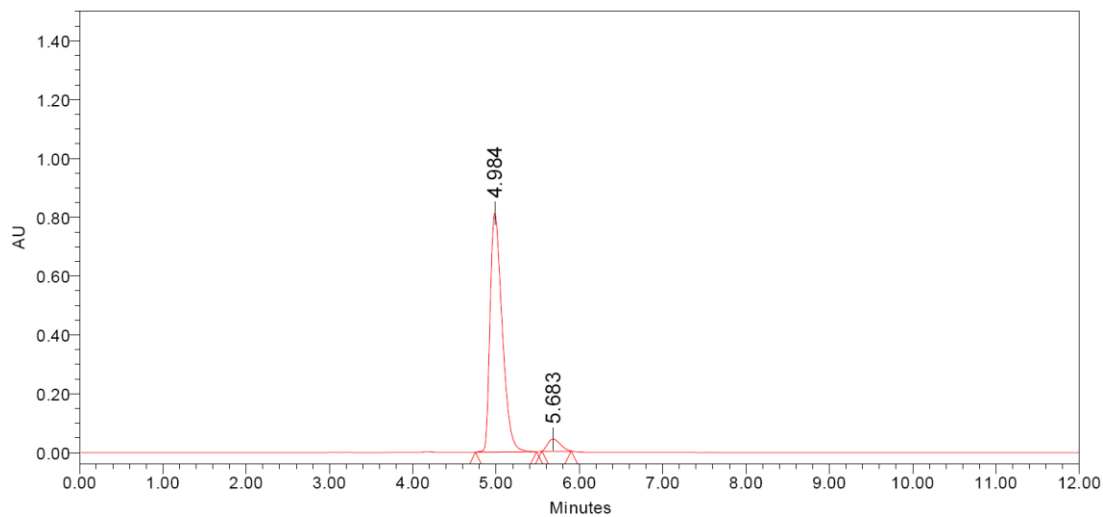

**Peak Results**

|   | Name | RT    | Area    | Height | % Area |
|---|------|-------|---------|--------|--------|
| 1 |      | 4.984 | 8200535 | 812700 | 95.06  |
| 2 |      | 5.683 | 426281  | 40814  | 4.94   |

**Auto-Scaled Chromatogram**

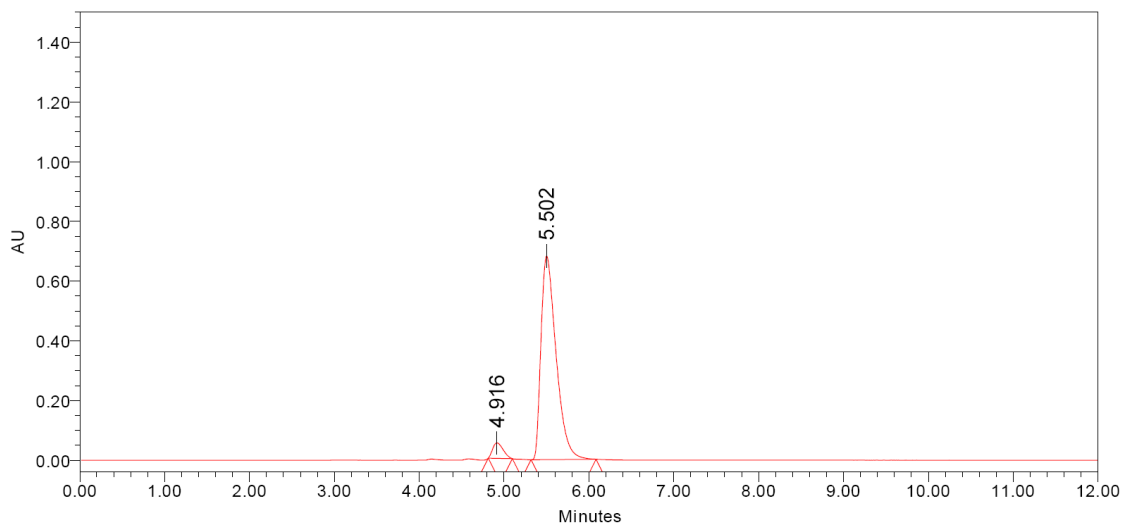

**Peak Results**

|   | Name | RT    | Area    | Height | % Area |
|---|------|-------|---------|--------|--------|
| 1 |      | 4.916 | 440618  | 51893  | 4.97   |
| 2 |      | 5.502 | 8427256 | 682419 | 95.03  |

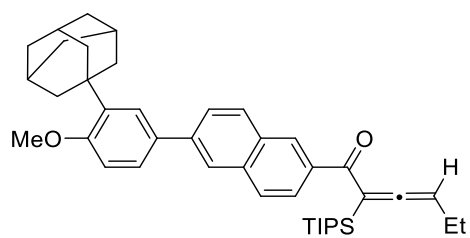

**Scheme 2, entry 27**  
*(R,S)*-L1: 91% ee; *(S,R)*-L1: 90% ee

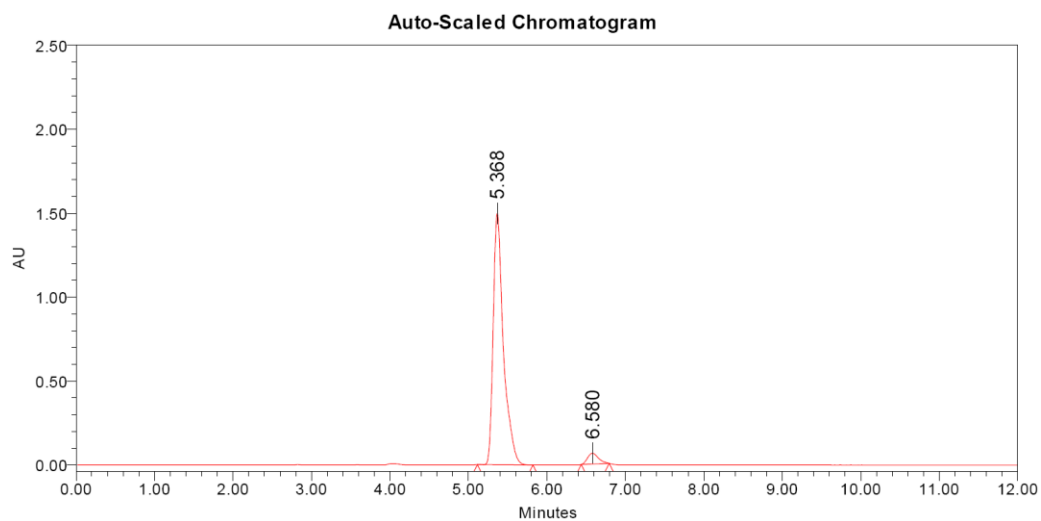

Peak Results

|   | Name | RT    | Area     | Height  | % Area |
|---|------|-------|----------|---------|--------|
| 1 |      | 5.368 | 13552058 | 1496556 | 95.61  |
| 2 |      | 6.580 | 622755   | 64837   | 4.39   |

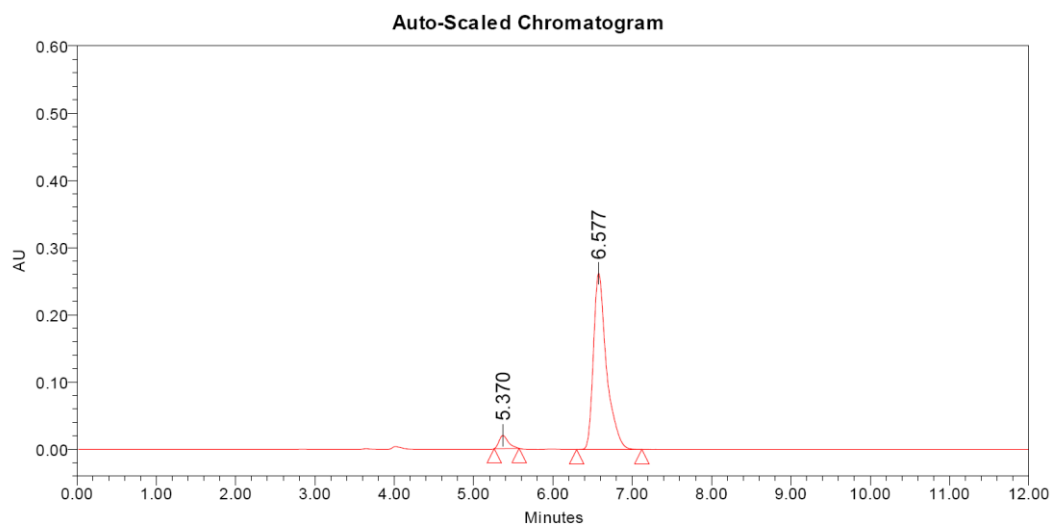

Peak Results

|   | Name | RT    | Area    | Height | % Area |
|---|------|-------|---------|--------|--------|
| 1 |      | 5.370 | 156707  | 19478  | 4.99   |
| 2 |      | 6.577 | 2985312 | 262054 | 95.01  |

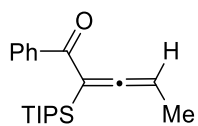

**Scheme 3, entry 28**  
 (*R,S*)-L1: 87% ee; (*S,R*)-L1: 87% ee

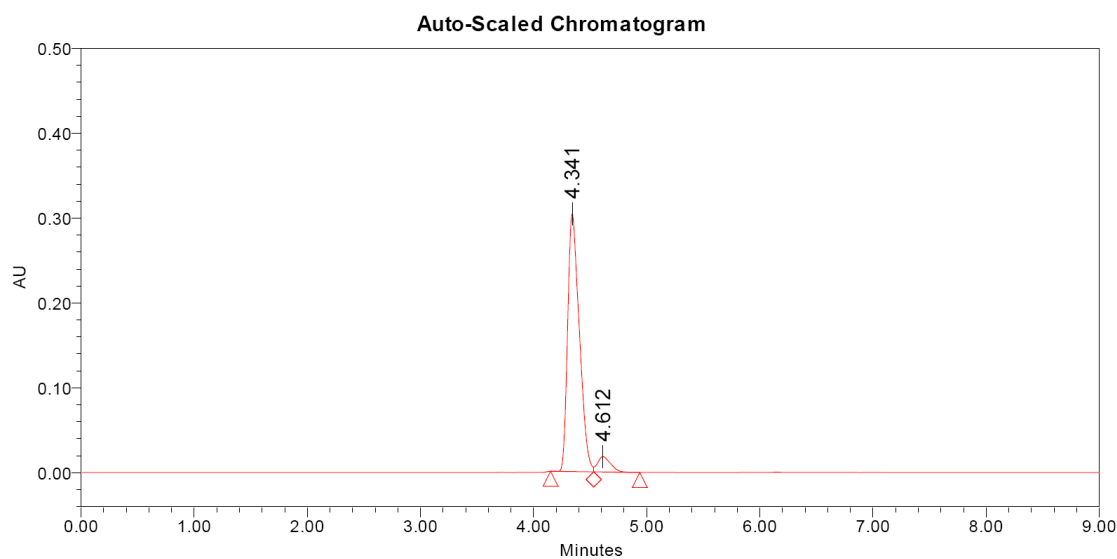

Peak Results

|   | Name | RT    | Area    | Height | % Area |
|---|------|-------|---------|--------|--------|
| 1 |      | 4.341 | 2172067 | 303749 | 93.81  |
| 2 |      | 4.612 | 143299  | 18158  | 6.19   |

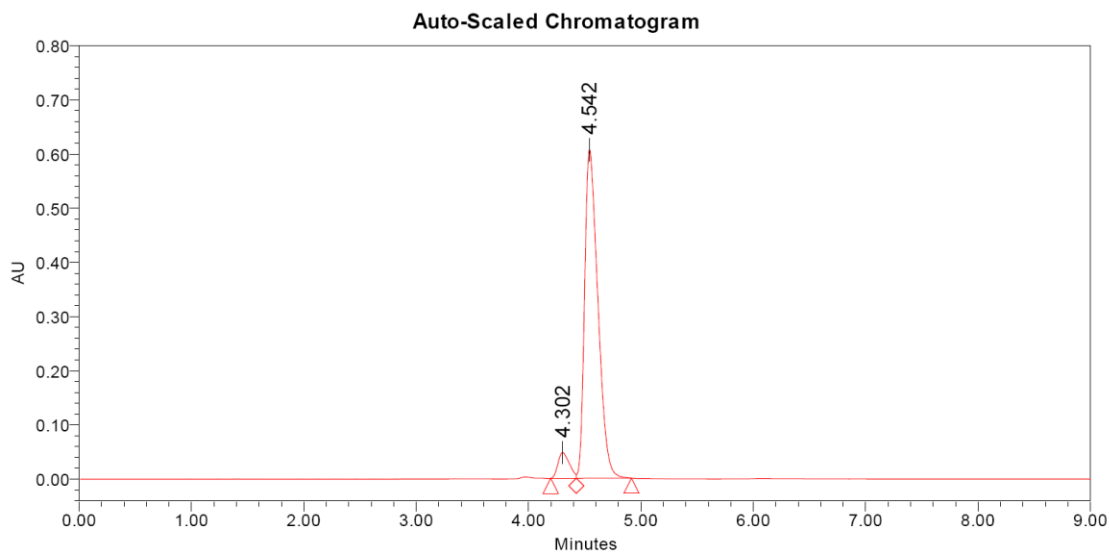

Peak Results

|   | Name | RT    | Area    | Height | % Area |
|---|------|-------|---------|--------|--------|
| 1 |      | 4.302 | 331422  | 47499  | 6.25   |
| 2 |      | 4.542 | 4970801 | 606740 | 93.75  |



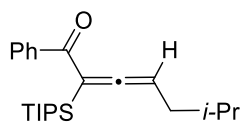

**Scheme 3, entry 29**  
 (*R,S*)-L1: 92% ee; (*S,R*)-L1: 93% ee

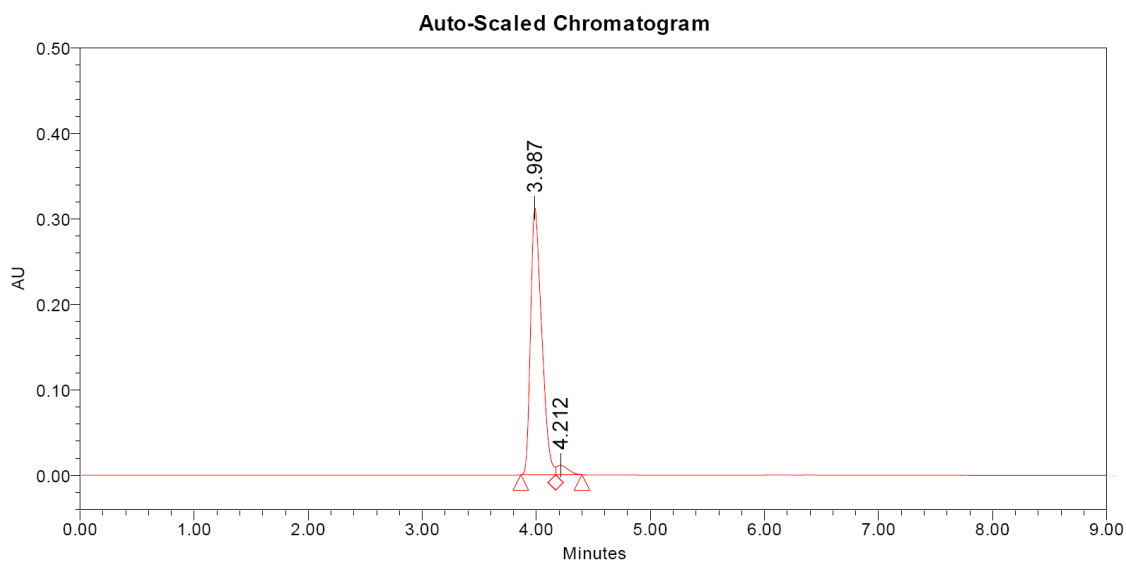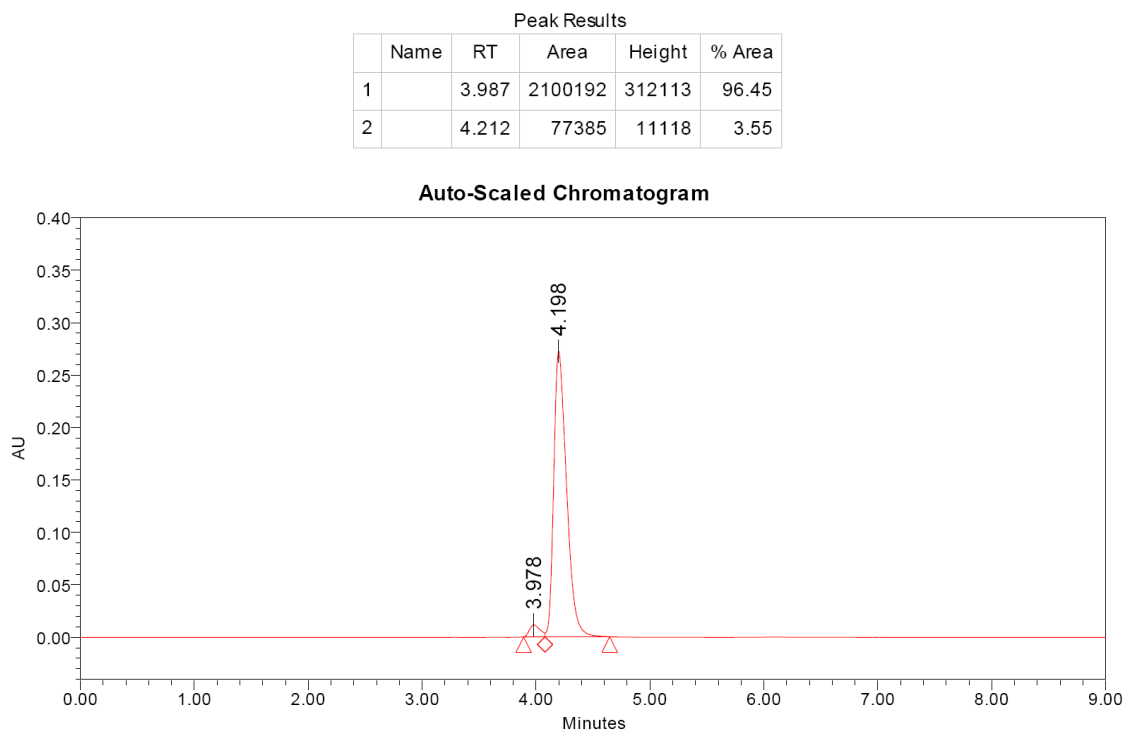

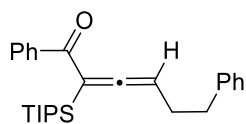

**Scheme 3, entry 30**  
*(R,S)*-L1: 90% ee; *(S,R)*-L1: 90% ee

**Auto-Scaled Chromatogram**

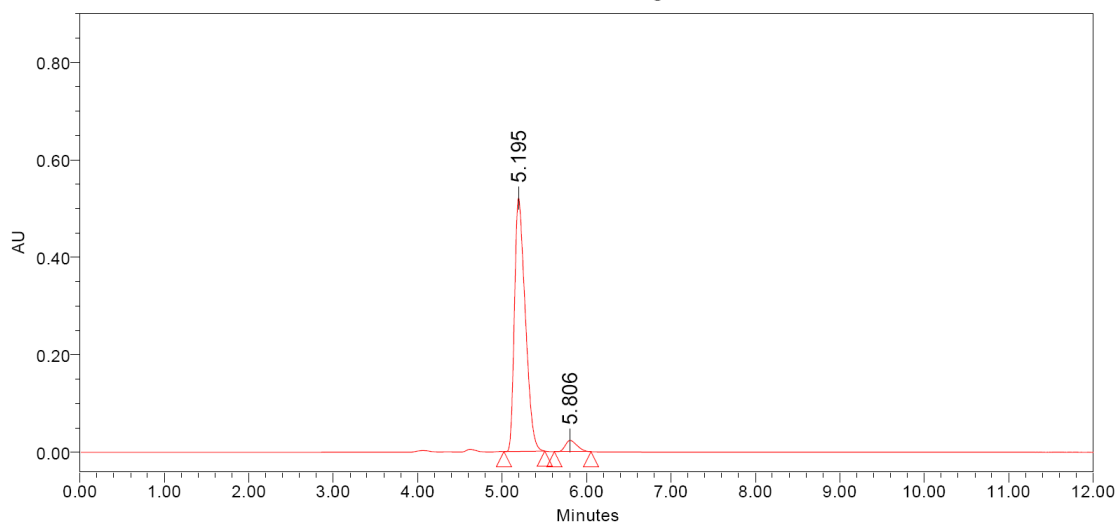

**Peak Results**

|   | Name | RT    | Area    | Height | % Area |
|---|------|-------|---------|--------|--------|
| 1 |      | 5.195 | 4610551 | 519758 | 95.35  |
| 2 |      | 5.806 | 224917  | 23237  | 4.65   |

**Auto-Scaled Chromatogram**

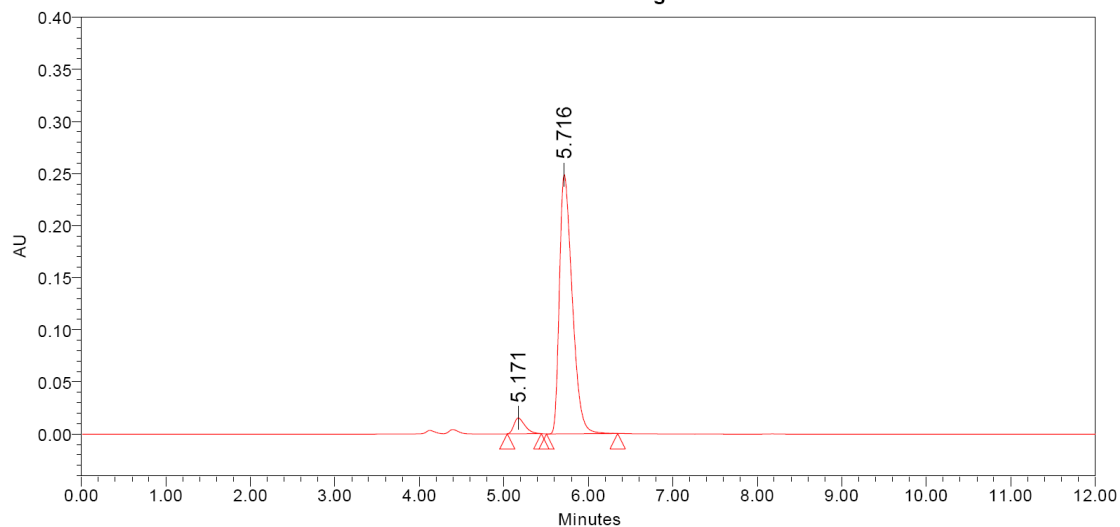

**Peak Results**

|   | Name | RT    | Area    | Height | % Area |
|---|------|-------|---------|--------|--------|
| 1 |      | 5.171 | 137205  | 15249  | 4.99   |
| 2 |      | 5.716 | 2610188 | 248732 | 95.01  |

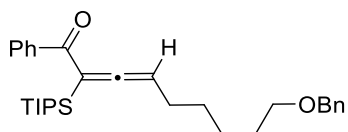

**Scheme 3, entry 31**  
*(R,S)*-L1: 91% ee; *(S,R)*-L1: 90% ee

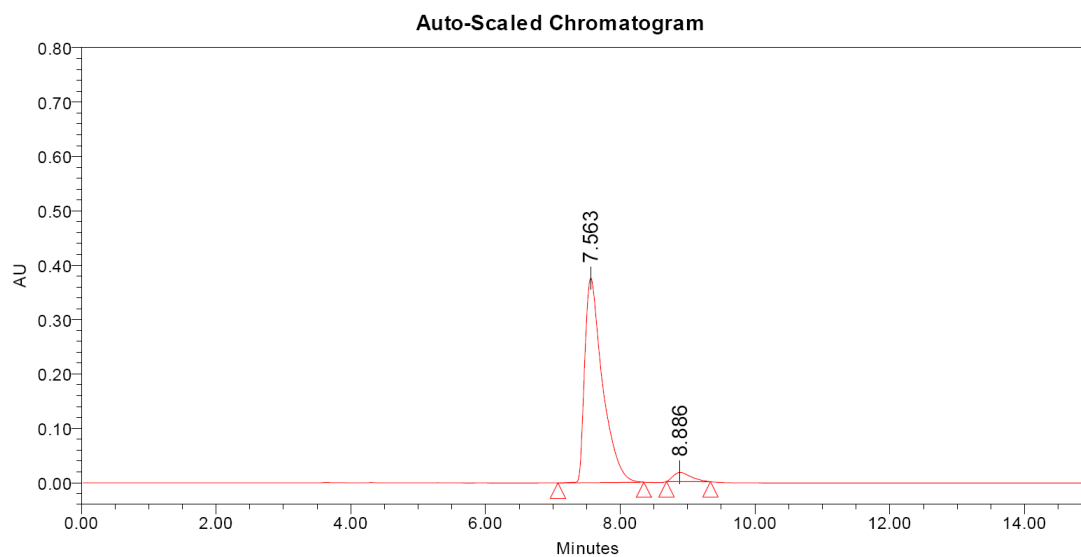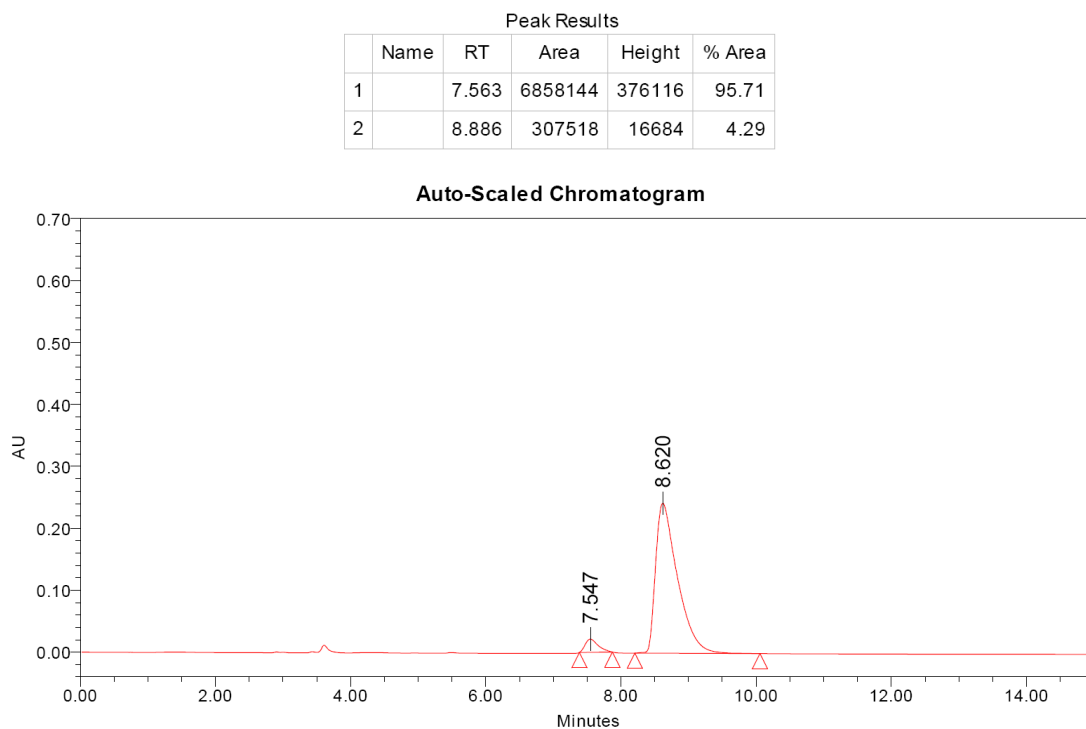

**Peak Results**

|   | Name | RT    | Area    | Height | % Area |
|---|------|-------|---------|--------|--------|
| 1 |      | 7.547 | 284631  | 21410  | 4.97   |
| 2 |      | 8.620 | 5446835 | 242179 | 95.03  |

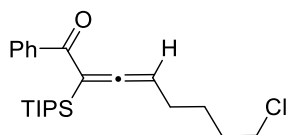

**Scheme 3, entry 32**  
*(R,S)*-L1: 90% ee; *(S,R)*-L1: 90% ee

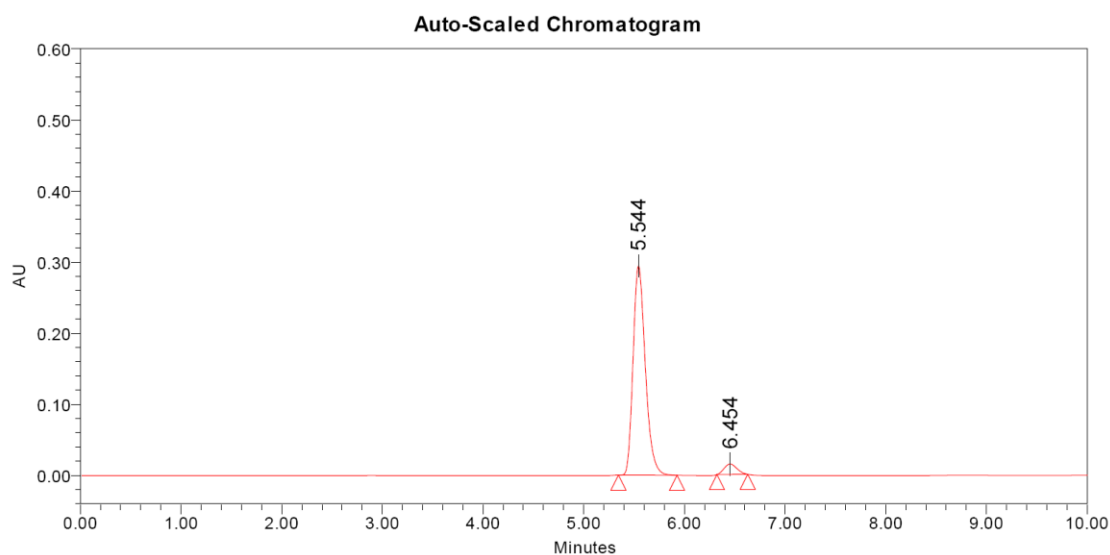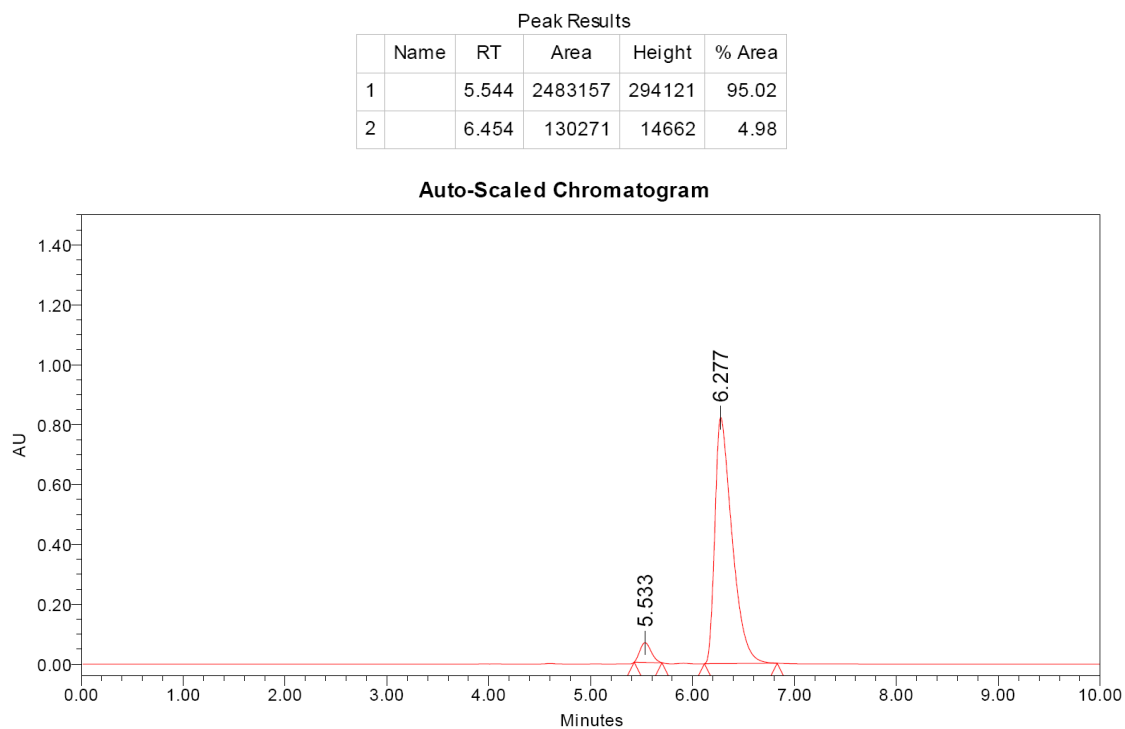

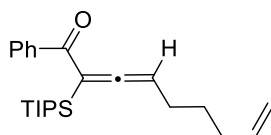

**Scheme 3, entry 33**  
 (*R,S*)-L1: 91% ee; (*S,R*)-L1: 91% ee

**Auto-Scaled Chromatogram**

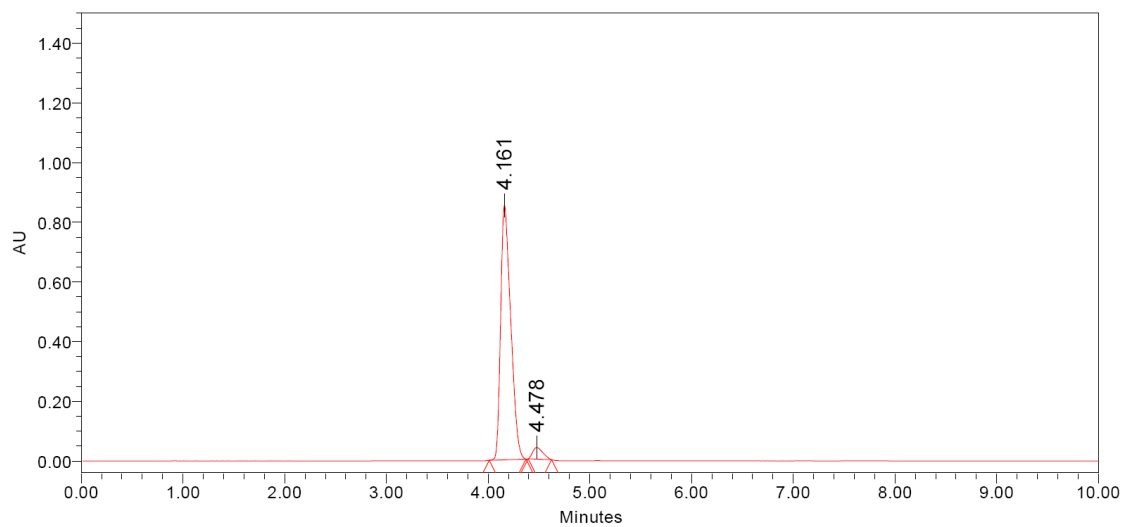

**Peak Results**

|   | Name | RT    | Area    | Height | % Area |
|---|------|-------|---------|--------|--------|
| 1 |      | 4.161 | 5852807 | 853216 | 95.63  |
| 2 |      | 4.478 | 267574  | 38935  | 4.37   |

**Auto-Scaled Chromatogram**

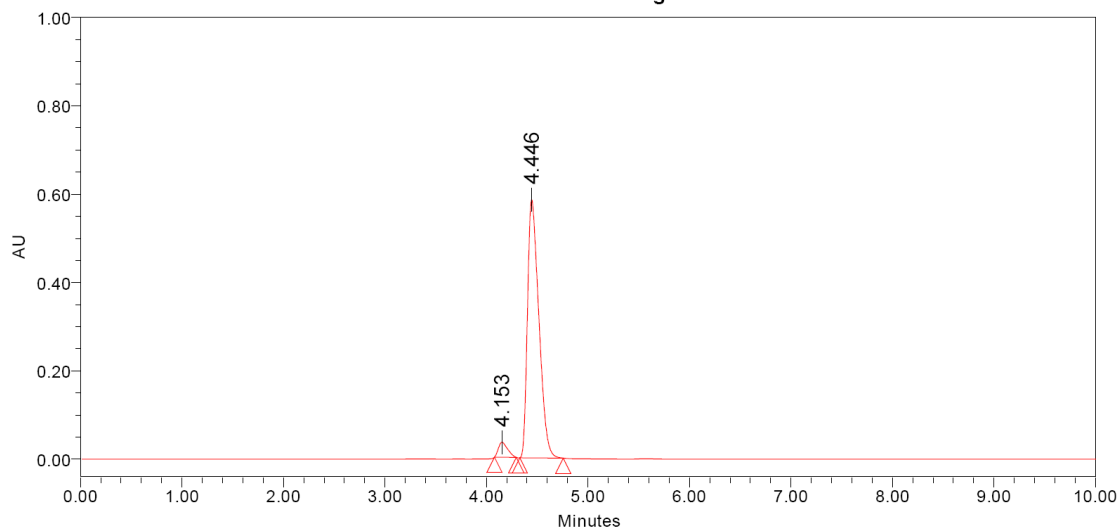

**Peak Results**

|   | Name | RT    | Area    | Height | % Area |
|---|------|-------|---------|--------|--------|
| 1 |      | 4.153 | 211273  | 34034  | 4.44   |
| 2 |      | 4.446 | 4548746 | 584859 | 95.56  |

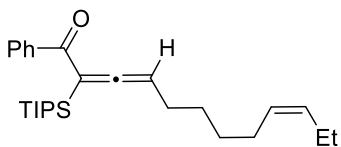

**Scheme 3, entry 34**  
 (*R,S*)-L1: 90% ee; (*S,R*)-L1: 90% ee

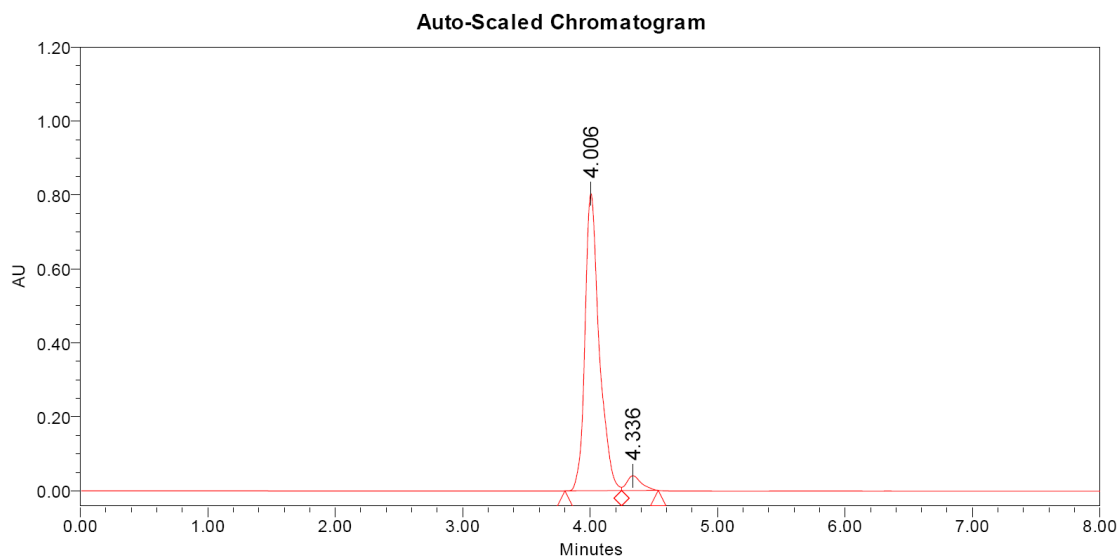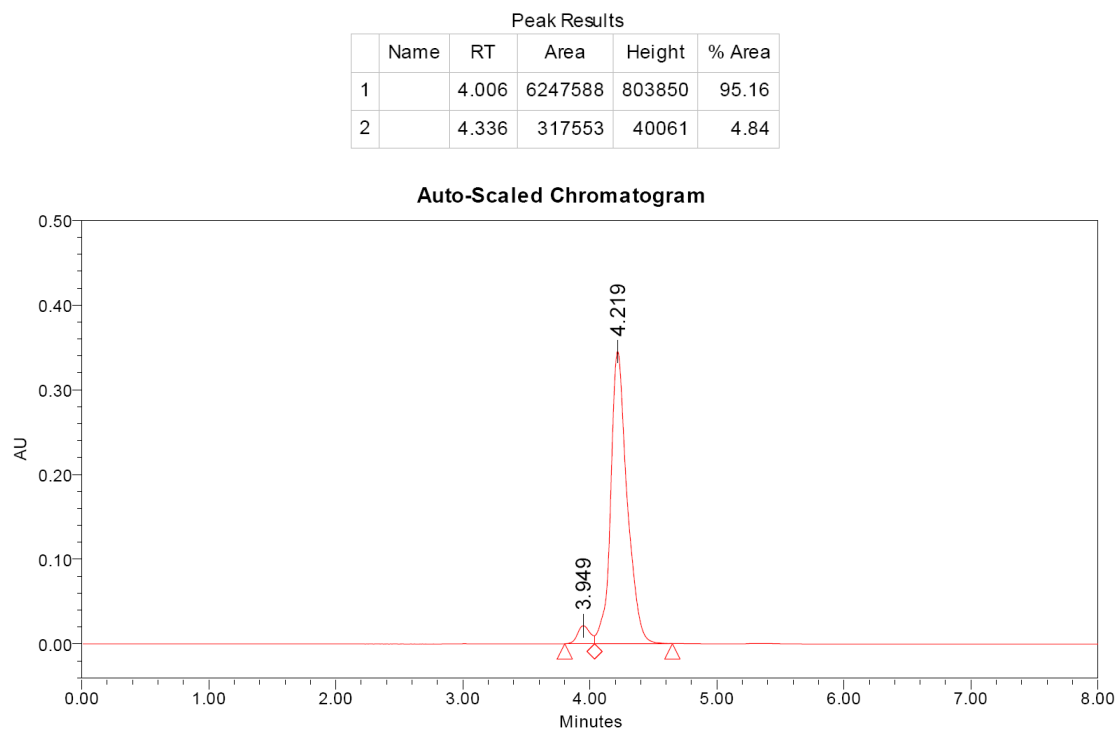

**Peak Results**

|   | Name | RT    | Area    | Height | % Area |
|---|------|-------|---------|--------|--------|
| 1 |      | 3.949 | 147552  | 21379  | 4.53   |
| 2 |      | 4.219 | 3108114 | 345019 | 95.47  |

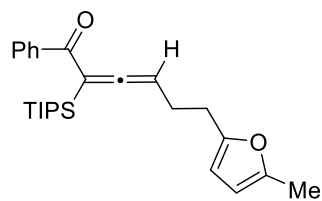

**Scheme 3, entry 35**  
*(R,S)*-L1: 88% ee; *(S,R)*-L1: 88% ee

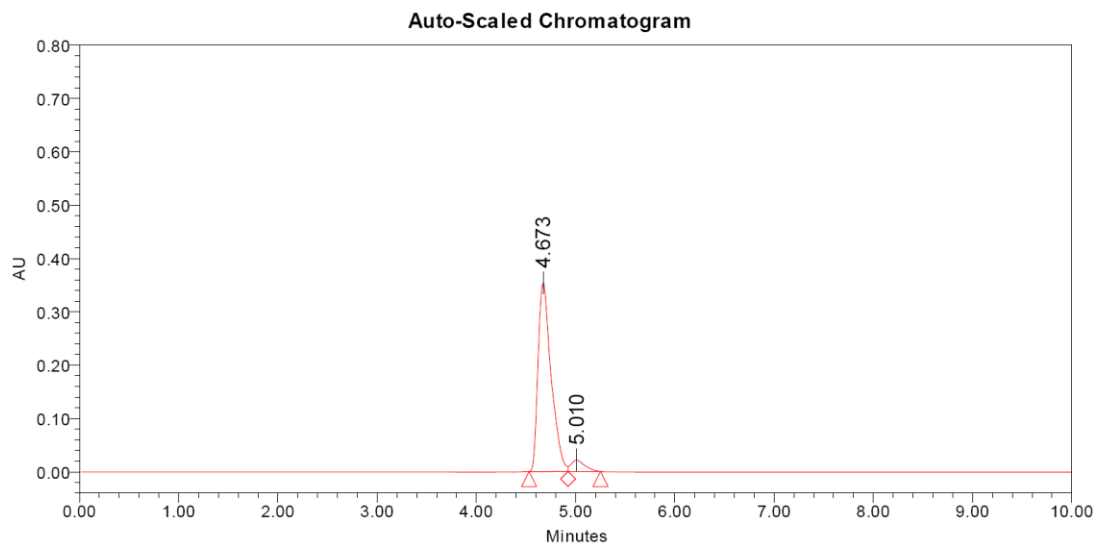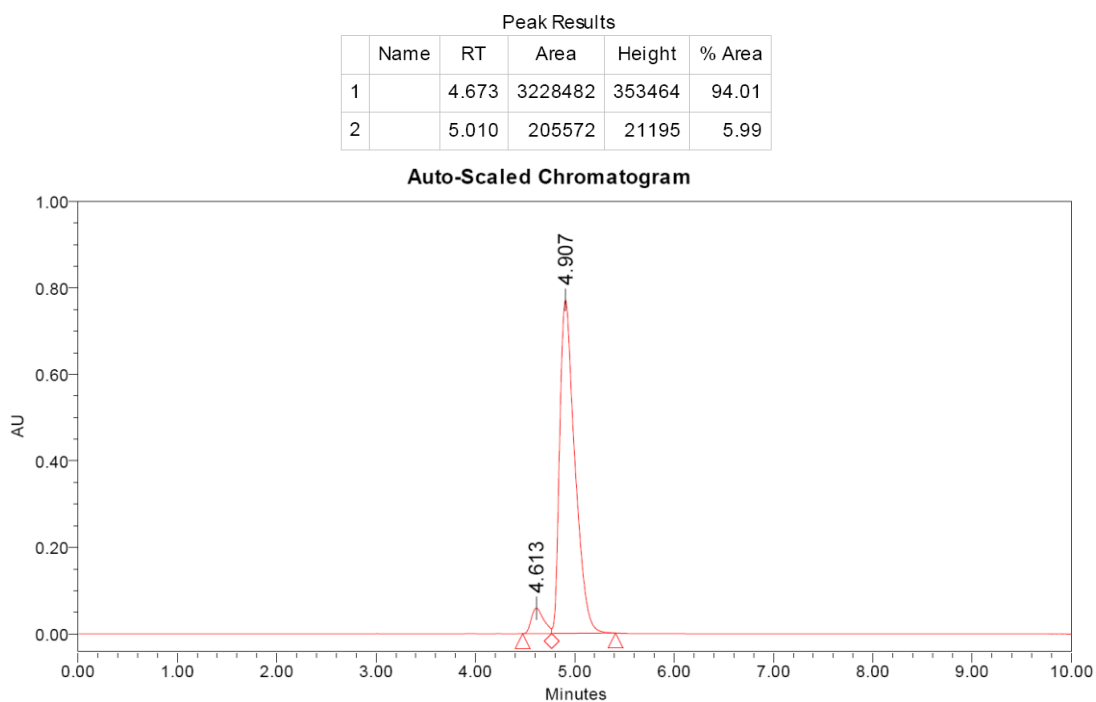

Peak Results

|   | Name | RT    | Area    | Height | % Area |
|---|------|-------|---------|--------|--------|
| 1 |      | 4.613 | 512414  | 59022  | 5.90   |
| 2 |      | 4.907 | 8166799 | 770890 | 94.10  |

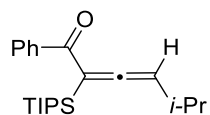

**Scheme 3, entry 36**  
*(R,S)*-L1: 92% ee; *(S,R)*-L1: 92% ee

**Auto-Scaled Chromatogram**

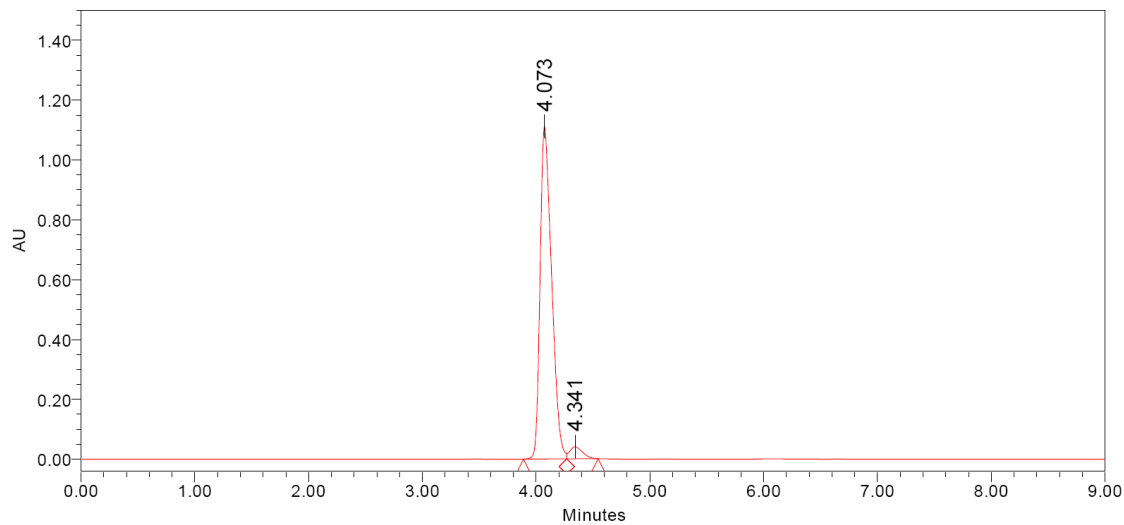

**Peak Results**

|   | Name | RT    | Area    | Height  | % Area |
|---|------|-------|---------|---------|--------|
| 1 |      | 4.073 | 7802582 | 1110994 | 96.14  |
| 2 |      | 4.341 | 313486  | 40361   | 3.86   |

**Auto-Scaled Chromatogram**

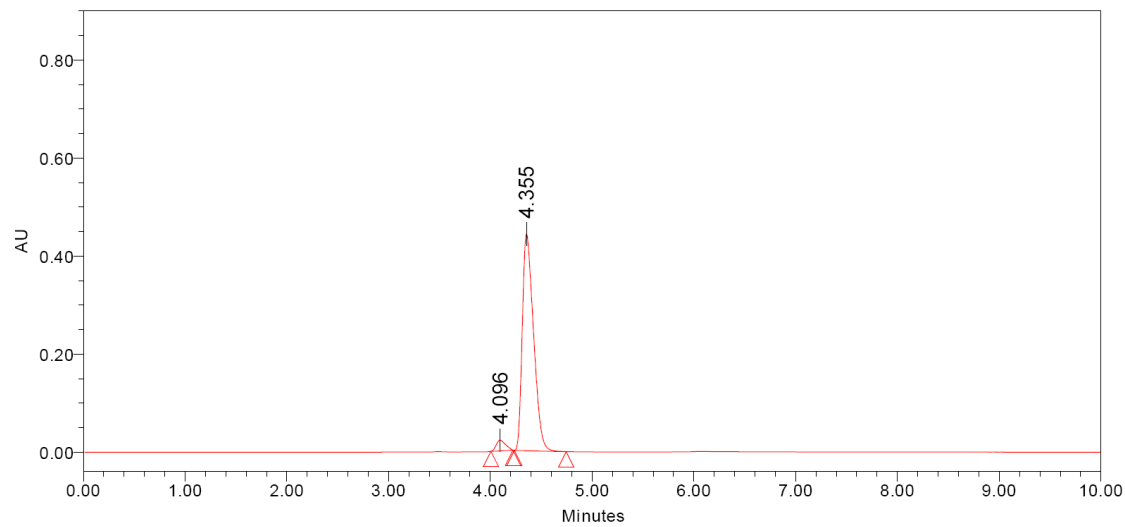

**Peak Results**

|   | Name | RT    | Area    | Height | % Area |
|---|------|-------|---------|--------|--------|
| 1 |      | 4.096 | 138205  | 21925  | 3.92   |
| 2 |      | 4.355 | 3386768 | 442599 | 96.08  |



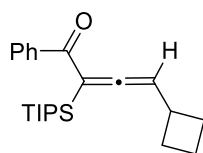

**Scheme 3, entry 37**  
 (R,S)-L1: 90% ee; (S,R)-L1: 90% ee

**Auto-Scaled Chromatogram**

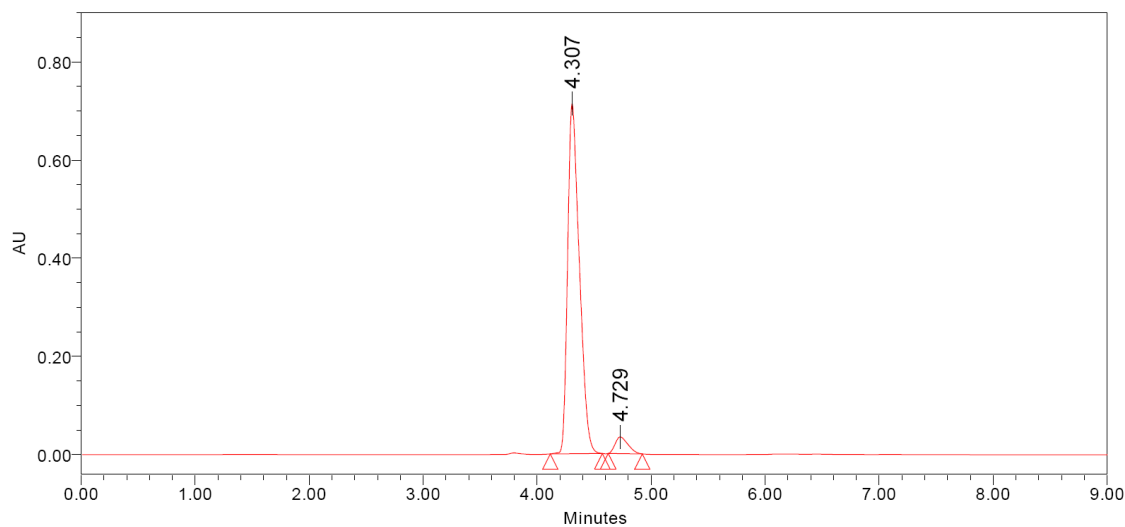

**Peak Results**

|   | Name | RT    | Area    | Height | % Area |
|---|------|-------|---------|--------|--------|
| 1 |      | 4.307 | 5088991 | 713257 | 95.04  |
| 2 |      | 4.729 | 265382  | 34106  | 4.96   |

**Auto-Scaled Chromatogram**

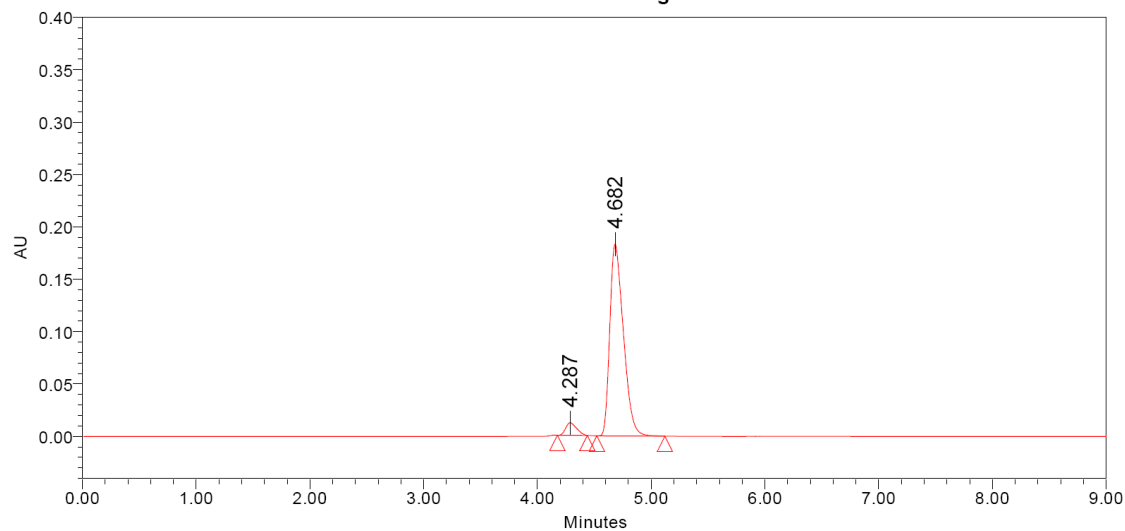

**Peak Results**

|   | Name | RT    | Area    | Height | % Area |
|---|------|-------|---------|--------|--------|
| 1 |      | 4.287 | 79247   | 12044  | 4.96   |
| 2 |      | 4.682 | 1518238 | 183135 | 95.04  |

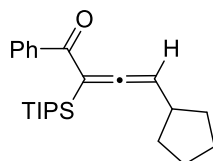

**Scheme 3, entry 38**  
 (*R,S*)-**L1**: 96% ee; (*S,R*)-**L1**: 96% ee

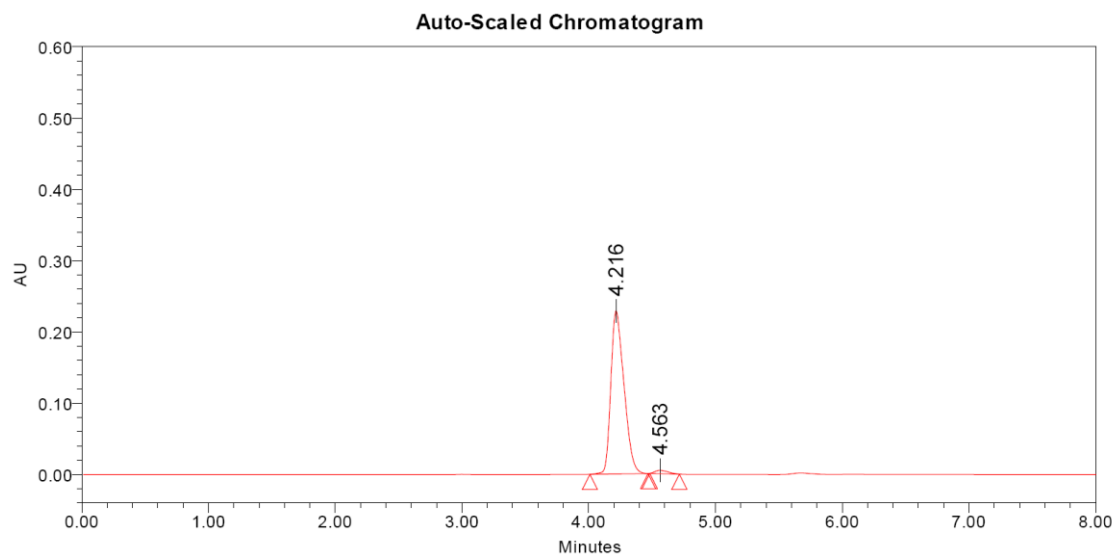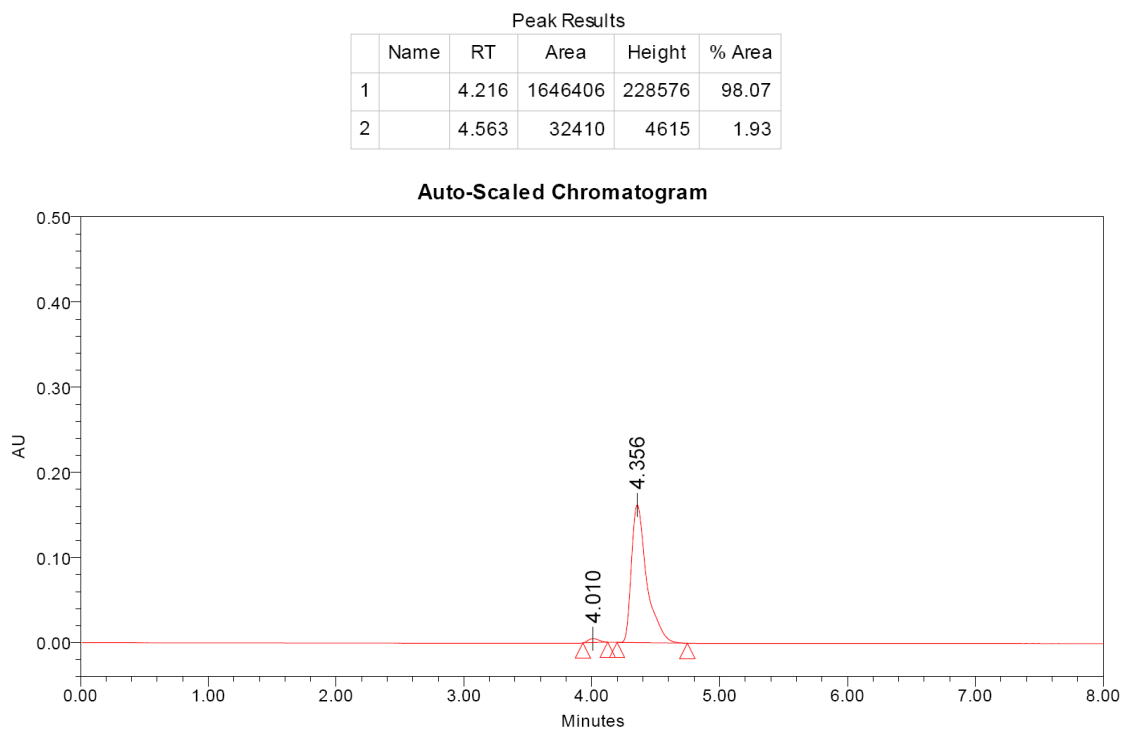

Peak Results

|   | Name | RT    | Area    | Height | % Area |
|---|------|-------|---------|--------|--------|
| 1 |      | 4.010 | 27483   | 4760   | 2.00   |
| 2 |      | 4.356 | 1346537 | 161782 | 98.00  |

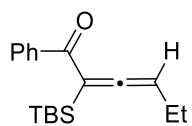

**Scheme 3, entry 39**  
*(R,S)*-L1: 74% ee; *(S,R)*-L1: 74% ee

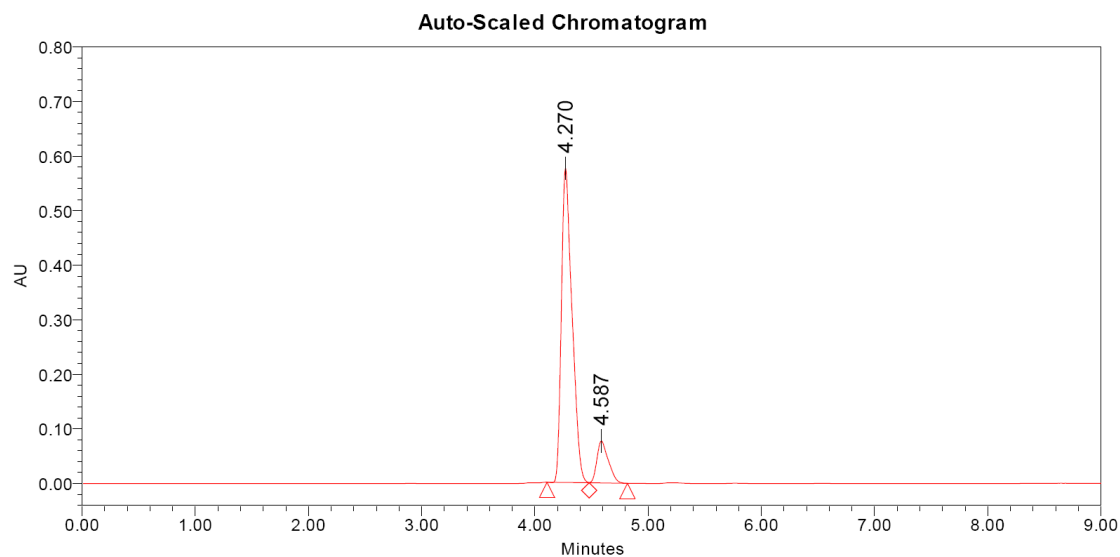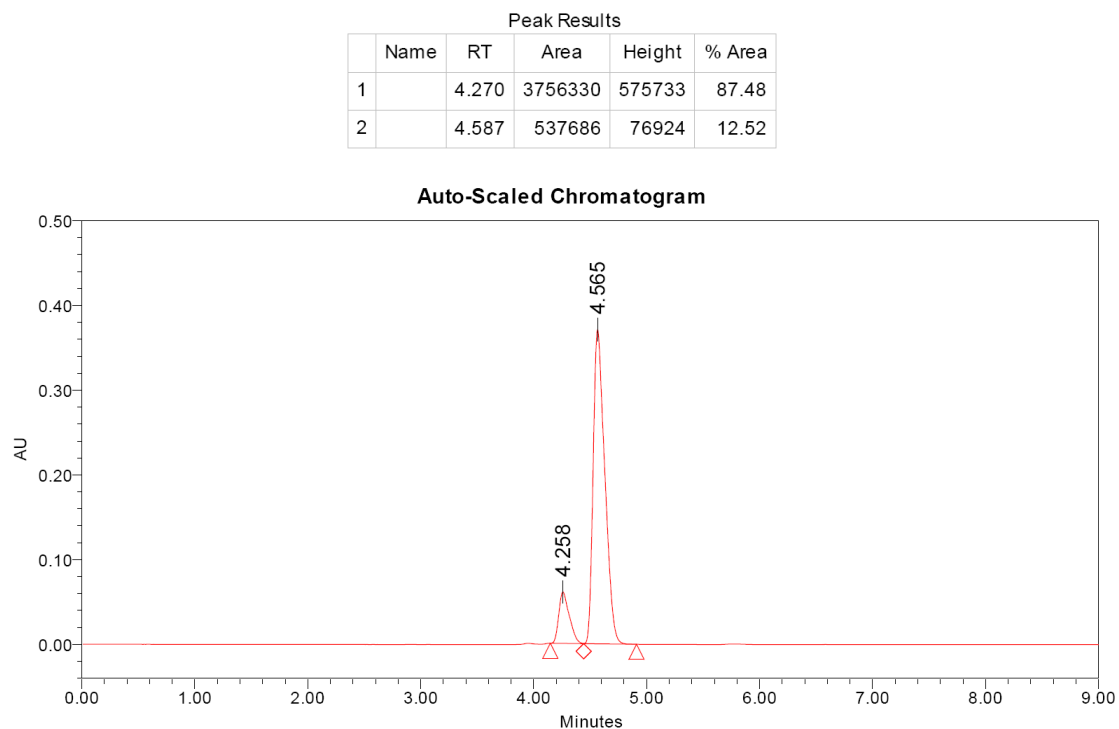

**Peak Results**

|   | Name | RT    | Area    | Height | % Area |
|---|------|-------|---------|--------|--------|
| 1 |      | 4.258 | 391975  | 60781  | 12.86  |
| 2 |      | 4.565 | 2656167 | 370944 | 87.14  |

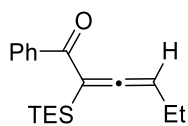

**Scheme 3, entry 40**  
 (*R,S*)-L1: 70% ee; (*S,R*)-L1: 70% ee

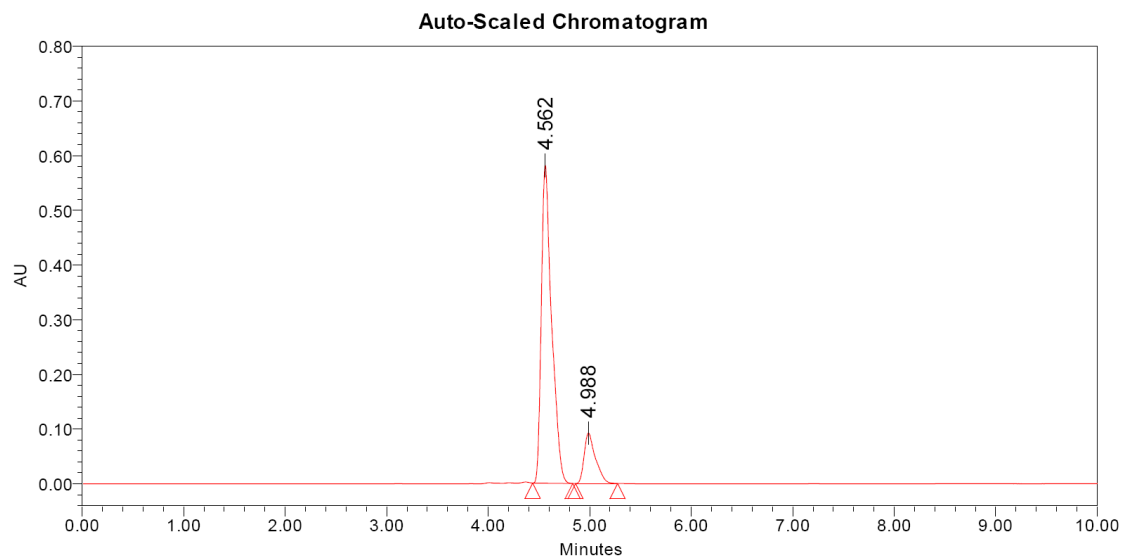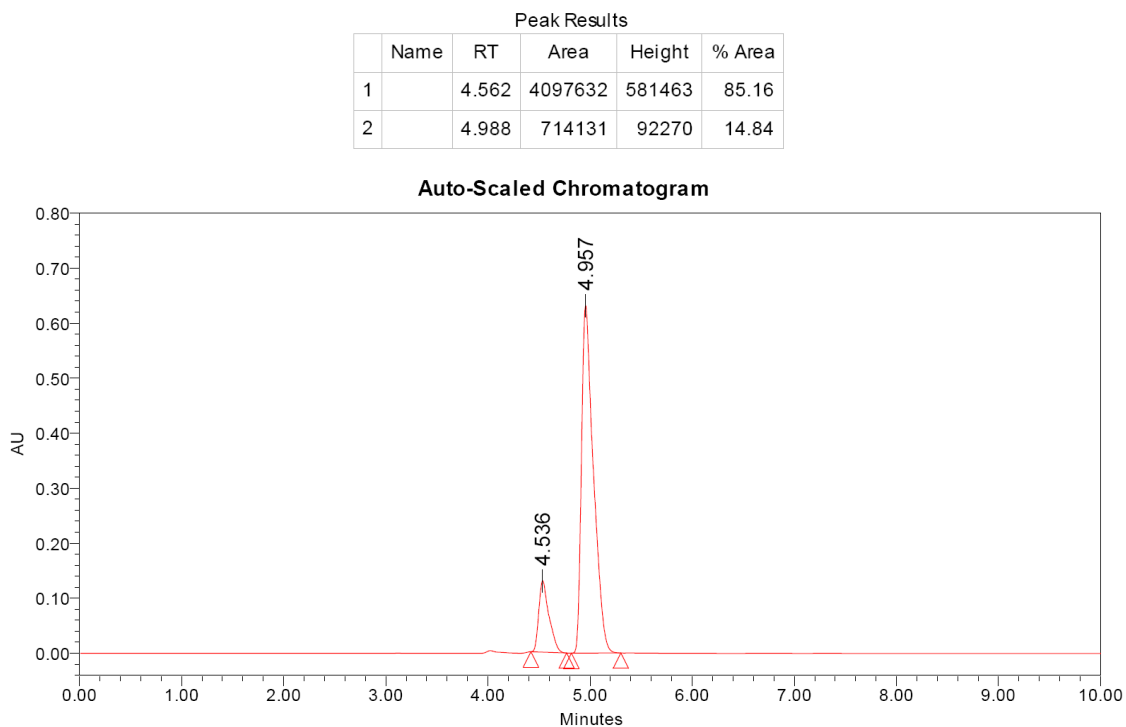

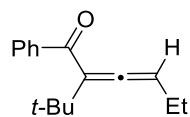

**Scheme 3, entry 41**  
*(R,S)*-L1: 95% ee; *(S,R)*-L1: 95% ee

**Auto-Scaled Chromatogram**

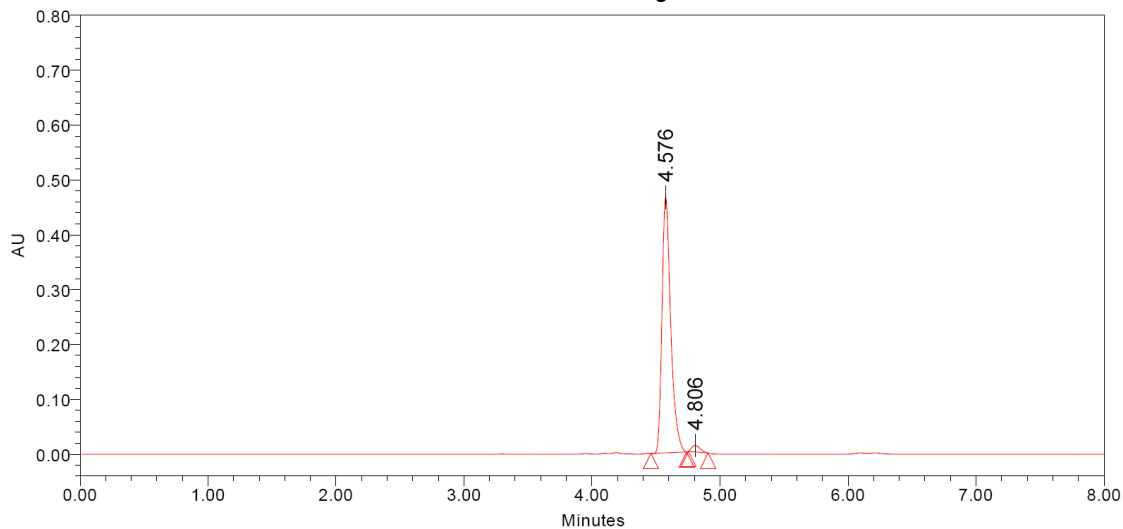

**Peak Results**

|   | Name | RT    | Area    | Height | % Area |
|---|------|-------|---------|--------|--------|
| 1 |      | 4.576 | 2208734 | 466059 | 97.58  |
| 2 |      | 4.806 | 54861   | 12026  | 2.42   |

**Auto-Scaled Chromatogram**

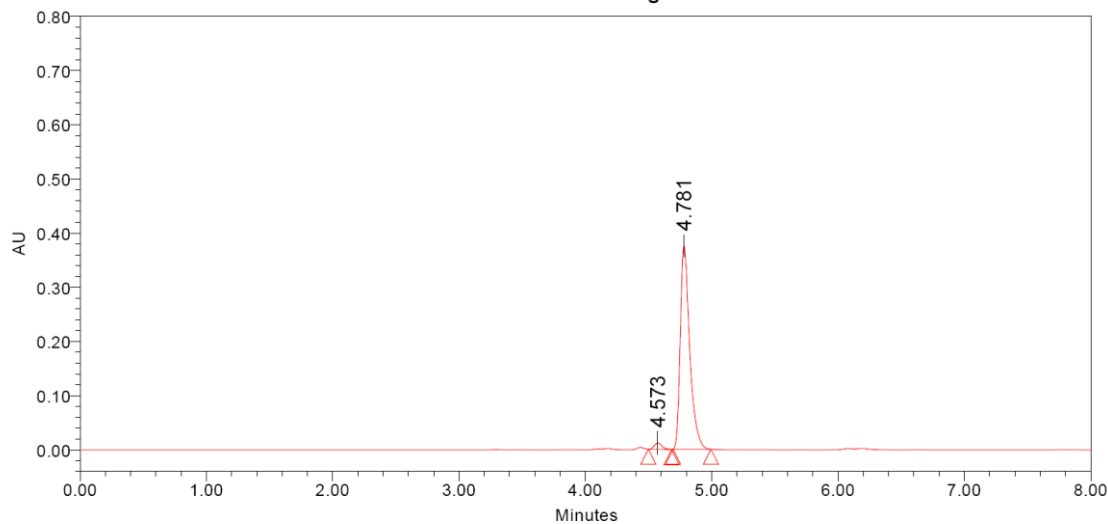

**Peak Results**

|   | Name | RT    | Area    | Height | % Area |
|---|------|-------|---------|--------|--------|
| 1 |      | 4.573 | 49362   | 11475  | 2.48   |
| 2 |      | 4.781 | 1940290 | 375245 | 97.52  |
